# Supplementary material for: A Genomic and Transcriptomic Study on the DDT-Resistant Trichoderma hamatum FBL 587: First Genetic Data into Mycoremediation Strategies for DDT-Polluted Sites
Source: MDPI journal article supplement (doi:10.3390/microorganisms9081680), 2021-08-07
Supplement: s1 [file s1]

**Supplementary Table S4.** The concentrations of DDT metabolites and isomers detected in soil and plant organs (mg/kg) of two *C. pepo* accessions inoculated with *T. hamatum* FBL 587. ND – not detected,  $\Sigma$ DDT = sum of DDT metabolites and isomers.

| Fraction          | Accession  | Treatment | p,p'-DDD | o,p'-DDD | p,p'-DDE | p,p'-DDT            | o,p'-DDT | $\Sigma$ DDT |
|-------------------|------------|-----------|----------|----------|----------|---------------------|----------|--------------|
| Initial soil      | AMES 26607 |           |          | 0.037    | ND       | 0.011               | 0.104    | ND           |
|                   | PI 614701  |           |          | 0.037    | ND       | 0.008               | 0.104    | ND           |
| Soil              | AMES 26607 | Control   | 0.024    | ND       | 0.010    | 0.075               | ND       | 0.108        |
|                   | PI 614701  | Control   | 0.031    | ND       | 0.011    | 0.082               | ND       | 0.124        |
|                   | AMES 26607 | +FBL587   | 0.026    | ND       | 0.009    | 0.068               | ND       | 0.104        |
|                   | PI 614701  | +FBL587   | 0.030    | ND       | 0.012    | 0.043               | ND       | 0.085        |
| Roots             | AMES 26607 | Control   | 0.042    | 0.009    | 0.017    | 0.050               | 0.005    | 0.123        |
|                   | PI 614701  | Control   | 0.072    | 0.016    | 0.026    | 0.230               | 0.021    | 0.365        |
|                   | AMES 26607 | +FBL587   | 0.040    | 0.006    | 0.021    | 0.163               | 0.014    | 0.243        |
|                   | PI 614701  | +FBL587   | 0.064    | 0.015    | 0.032    | 0.273               | 0.029    | 0.412        |
| Shoots and leaves | AMES 26607 | Control   | 0.006    | ND       | ND       | ND                  | ND       | 0.006        |
|                   | PI 614701  | Control   | 0.012    | ND       | ND       | ND                  | ND       | 0.012        |
|                   | AMES 26607 | +FBL587   | 0.013    | ND       | ND       | ND                  | ND       | 0.013        |
|                   | PI 614701  | +FBL587   | 0.012    | ND       | ND       | ND                  | ND       | 0.012        |
| Fruits            | AMES 26607 | Control   |          |          |          | ND                  |          |              |
|                   | PI 614701  | Control   |          |          |          | ND                  |          |              |
|                   | AMES 26607 | +FBL587   |          |          |          | no fruits available |          |              |
|                   | PI 614701  | +FBL587   |          |          |          | no fruits available |          |              |
