# Supplementary material for: A Genomic and Transcriptomic Study on the DDT-Resistant Trichoderma hamatum FBL 587: First Genetic Data into Mycoremediation Strategies for DDT-Polluted Sites
Source: MDPI journal article supplement (doi:10.3390/microorganisms9081680), 2021-08-07
Supplement: s1 [file s1]

**Supplementary Table S1.** Number of NGS-RNASeq reads before and after quality check on the raw sequencing data from *T. hamatum* FBL 587.

| Sample name | Raw reads  | Trimmed reads |
|-------------|------------|---------------|
| Treatment   |            |               |
| X7          | 26,243,489 | 21,106,233    |
| X8          | 27,183,202 | 22,544,499    |
| X9          | 27,559,216 | 22,606,573    |
| Control     |            |               |
| X10         | 29,156,404 | 24,066,207    |
| X11         | 27,478,579 | 22,560,427    |
| X12         | 29,202,771 | 23,784,059    |
