# Supplementary material for: A Genomic and Transcriptomic Study on the DDT-Resistant Trichoderma hamatum FBL 587: First Genetic Data into Mycoremediation Strategies for DDT-Polluted Sites
Source: Microorganisms. 2021 Aug 7;9(8):1680. doi: 10.3390/microorganisms9081680 (PMC8401308; doi:10.3390/microorganisms9081680)
Supplement: Supplementary file 1 [file microorganisms-09-01680-s001.zip]

Archive with 13 entries (13 files):
- Figure S1.tif
- Supplementary Table Figure caption.pdf
- Table S1.pdf
- Table S10_SM GD12.xlsx
- Table S11 SM MUT 3171.xlsx
- Table S2_TMM.xlsx
- Table S3_RPKM.xlsx
- Table S4.pdf
- Table S5_CAZyme_FBL587.xlsx
- Table S6_SM FBL587.xlsx
- Table S7_SM CBS 433.37.xlsx
- Table S8_SM IMI 2060.xlsx
- Table S9_SM T6085.xlsx
