# Supplementary material for: A Genomic and Transcriptomic Study on the DDT-Resistant Trichoderma hamatum FBL 587: First Genetic Data into Mycoremediation Strategies for DDT-Polluted Sites
Source: Microorganisms. 2021 Aug 7;9(8):1680. doi: 10.3390/microorganisms9081680 (PMC8401308; doi:10.3390/microorganisms9081680)
Supplement: Supplementary file 1 [file microorganisms-09-01680-s001.zip › Table S2_TMM.xlsx]

## Sheet: TMM
Locus	X10_Control	X11_Control	X12_Control	X7_Treatment	X8_Treatment	X9_Treatment
g10777	0	0	0	1.19506136601146	2.47773114341411	0.563728921396962
g10778	96.25958152539	107.151441663287	181.734289164148	37.6444330293611	24.7773114341411	52.9905186113145
g10779	27.9463301202745	51.9522141397754	94.1123997457195	93.8123172318998	88.5788883770543	93.0152720304988
g10780	18.6308867468497	0	0	1.79259204901719	2.47773114341411	5.63728921396962
g10781	0	9.74104015120789	0	0	0	0
g10782	71.4183991962571	97.4104015120788	87.6218894184285	143.407363921376	96.6315145931501	74.975946545796
g10783	773.181799994261	1048.78532294672	976.821804257296	42.4246784934069	61.3238457994991	52.9905186113145
g3911	0	19.4820803024158	12.981020654582	4.78024546404585	3.71659671512116	0.563728921396962
g3912	0	0	0	2.39012273202293	4.95546228682821	3.38237352838177
g3913	12.4205911645664	22.7290936861517	22.7167861455185	37.0469023463553	60.0849802277921	43.4071269475661
g3914	220.465493171054	204.561843175366	116.829185891238	328.044344970146	291.133409351157	235.074960222533
g3915	6.21029558228322	19.4820803024158	16.2262758182275	14.9382670751433	10.5303573595099	7.32847597816051
g3916	18.6308867468497	16.2350669186798	6.490510327291	42.4246784934069	17.9635507897523	14.656951956321
g3917	68.3132514051155	16.2350669186798	45.433572291037	29.2790034672808	12.3886557170705	26.4952593056572
g3918	186.308867468497	292.231204536237	152.526992691339	151.17526280045	198.837924258982	165.17257396931
g3919	888.072268266501	879.940626992446	600.372205274418	979.950320129399	997.286785224177	1084.05071584636
g3920	149.047093974797	133.127548733174	51.924082618328	54.9728228365273	76.8096654458373	54.1179764541084
g3921	9526.59342322247	6857.69226645035	7431.6343247482	1385.07612320729	874.019660839326	1297.14024813441
g3922	127.311059436806	337.68939190854	217.432095964249	436.79492927719	437.938979598443	389.536684685301
g3923	0	0	9.7357654909365	0	0	0
g3924	158.362537348222	237.031977012725	243.394137273412	295.180157404831	272.550425775552	289.192936676642
g3925	74.5235469873987	207.808856559102	133.055461709466	184.039450365765	176.538343968255	198.432580331731
g3926	80.7338425696819	64.9402676747192	35.6978068001005	201.367840172931	163.530255465331	241.2759783579
g3927	468.877316462383	668.884757049608	412.147405782979	898.68614724062	943.396132854921	932.407635990576
g3928	1235.84882087436	1532.59031712337	1178.02762440332	1352.80946632498	1486.01925326261	1519.81317208621
g3929	90.0492859431068	103.904428279551	103.848165236656	236.024619787264	238.481622553608	268.334966584954
g3930	518.559681120649	454.581873723035	564.674398474317	348.360388192341	602.708100635481	541.743493462481
g3931	0	0	0	0	1.23886557170705	6.20101813536659
g3932	347.776552607861	500.040061095338	350.487557673714	341.787550679278	283.700215920915	288.629207755245
g3933	220.465493171054	123.386508581967	204.451075309666	169.101183290622	169.105150538013	155.589182305562
g10784	164.572832930505	129.880535349438	146.036482364048	191.80734924484	175.918911182401	129.657651921301
g10785	0	6.49402676747192	3.2452551636455	12.5481443431204	3.09716392926763	12.9657651921301
g10786	0	0	0	0	0	0
g10787	0	0	0	0	0	0
g10788	1114.74805701984	1065.0203898654	1129.34879694863	501.925773724814	509.793182757452	461.130257702715
g10789	394.353769474985	376.653552513372	259.62041309164	574.226986368508	465.194022175998	395.173973899271
g10790	242.201527709046	779.283212096631	373.204343819233	1146.06385000499	734.647284022282	546.253324833657
g10791	0	0	0	0	0	0
g10792	0	0	0	0	0	0
g10793	0	16.2350669186798	0	23.3036966372235	8.67205900194937	10.7108495065423
g10794	0	0	0	0	0	0
g3934	127.311059436806	35.7171472210956	159.017503018629	127.871566163227	163.530255465331	221.545466109006
g3935	121.100763854523	136.37456211691	51.924082618328	149.382670751433	160.433091536063	118.383073493362
g3936	3387.7162401355	2974.26425950214	2829.86250269888	2120.63639398734	2950.9777918062	3486.09964991881
g3937	0	0	25.962041309164	1.19506136601146	0	2.81864460698481
g3938	2490.32852849557	509.781101246546	3693.10037622858	608.286235299835	2194.65036027904	2281.41094489351
g3939	6.21029558228322	22.7290936861517	29.2072964728095	47.8024546404585	48.9351900824286	45.662042633154
g3940	0	0	0	0	0	0
g3941	0	0	0	10.1580216110974	8.05262621609584	2.81864460698481
g3942	77.6286947785403	87.669361360871	61.6598481092645	150.577732117444	140.61124238875	149.388164170195
g3943	6.21029558228322	3.24701338373596	0	0	2.47773114341411	2.81864460698481
g3944	124.205911645664	25.9761070698877	32.452551636455	38.2419637123668	38.4048327229186	39.4610244977874
g3945	62.1029558228322	32.4701338373596	22.7167861455185	130.859219578255	141.230675174604	210.834616602464
g3946	0	0	0	0	0	0
g3947	549.611159032065	422.111739885675	438.109447092142	394.370250783783	344.404628934561	299.340057261787
g3948	530.980272285216	506.53408786281	373.204343819233	690.745469554625	750.13310366862	768.926248785457
g3949	2807.05360319202	1870.27970903191	3251.74567397279	204.35549358796	293.611140494571	295.393954812008
g3950	1176.85101284267	831.235426236406	980.067059420941	446.355420205281	548.198015480371	563.728921396962
g3951	6999.00312123319	5643.3092609331	7947.62989576783	4410.3739712653	4494.60429415319	4917.9711102671
g3952	139.731650601373	90.9163747446069	87.6218894184285	224.671536810155	206.890550475078	218.163092580624
g3953	12.4205911645664	12.9880535349438	3.2452551636455	20.9135739052006	37.1659671512116	12.9657651921301
g3954	17581.3467934438	16563.0152704371	24663.9392437058	448.745542937304	542.003687621836	2915.60598146509
g3955	832.179608025952	1103.98455047023	1229.95170702164	159.54069236253	180.87437346923	410.958383698386
g3956	3732.38764495222	4302.29273345015	4338.90615379403	711.659043459826	643.590664501814	2295.50416792843
g3957	4142.26715338291	5575.12197987465	5465.00969557902	1944.36484250065	2337.11990102535	2287.04823410748
g3958	695.553105215721	802.012305782783	869.728383856994	351.945572290376	348.121225649682	408.139739091401
g3959	6961.74134773949	9812.47444565008	9242.48670606238	783.362725420514	825.703903542751	984.834425680493
g3960	37.2617734936993	74.6813078259271	35.6978068001005	79.4715808397623	70.615337587302	85.6867960523383
g3961	9.31544337342484	32.4701338373596	22.7167861455185	52.5827001045044	40.2631310804792	34.9511931266117
g3962	71.4183991962571	103.904428279551	84.376634254783	166.711060558599	133.797481744362	125.711549471523
g3963	562.031750196632	454.581873723035	519.24082618328	665.649180868385	528.376166333058	653.925548820476
g3964	440.930986342109	298.725231303708	512.750315855989	368.07890073153	296.708304423839	294.830225890611
g3965	692.447957424579	759.801131794215	817.804301238666	388.992474636731	450.947068101367	394.610244977874
g3966	1301.05692448834	1110.4785772377	1048.2174178575	1462.75511199803	1576.45643999722	1718.80948133934
g10795	0	0	0	0	0	0
g10796	0	6.49402676747192	9.7357654909365	2.39012273202293	9.91092457365642	7.89220489955747
g10797	86.9441381519651	74.6813078259271	120.074441054884	39.4370250783783	51.4129212258427	59.191536746681
g10798	478.192759835808	516.275128014018	649.0510327291	519.851694214986	553.153477767199	430.125167025882
g10799	0	0	0	0	0	0
g10800	652.081036139739	1613.76565171677	1203.98966571248	732.572617365027	759.424595456423	1268.39007314317
g10801	0	12.9880535349438	0	2.39012273202293	0	0
g10802	37.2617734936993	35.7171472210956	22.7167861455185	20.3160432221949	17.9635507897523	21.9854279344815
g10803	21.7360345379913	48.7052007560394	12.981020654582	38.2419637123668	72.4736359448626	64.2650970392537
g10804	31.0514779114161	12.9880535349438	3.2452551636455	28.0839421012694	25.3967442199946	10.7108495065423
g10805	409.879508430693	564.980328770057	301.808730219032	656.686220623299	618.193920281819	670.837416462385
g10806	338.461109234436	159.103655803062	301.808730219032	222.878944761138	260.161770058481	240.712249436503
g10807	130.416207227948	94.1633881283429	116.829185891238	126.078974114209	96.6315145931501	121.201718100347
g3967	136.626502810231	181.832749489214	81.1313790911375	189.417226512817	232.287294695072	183.77562837541
g3968	888.072268266501	396.135632815787	577.655419128899	806.068891374732	738.983313523257	586.841807174238
g3969	425.405247386401	701.354890886968	645.805777565454	702.69608321474	668.987408721808	591.351638545413
g3970	80.7338425696819	81.175334593399	90.867144582074	183.44191968276	207.509983260931	196.177664646143
g3971	0	0	0	7.76789887907451	10.5303573595099	9.0196627423514
g3972	0	45.4581873723035	48.6788274546825	55.570353519533	61.9432785853526	62.0101813536659
g3973	1251.37455983007	1418.94484869262	1019.01012138469	1755.54514667084	1948.11611150934	1779.12847592881
g3974	19748.7399516607	10367.7137342689	18764.0653561983	1209.4021024036	2240.4883864322	2230.11161304638
g3975	102.469877107673	16.2350669186798	55.1693377819735	70.5086205946763	118.311662098024	89.632898502117
g3976	0	0	0	1.19506136601146	0.619432785853526	1.12745784279392
g3977	1161.32527388696	1103.98455047023	941.123997457195	1661.73282943894	1677.42398409135	1328.70906773264
g3978	347.776552607861	444.840833571827	639.315267238164	130.859219578255	139.372376817043	161.226471519531
g3979	1155.11497830468	1061.77337648166	1178.02762440332	280.839421012694	281.841917563354	400.81126311324
g3980	8644.73145053825	10685.921045875	8535.02108038767	7610.748309444	8937.17623429468	8857.87254191047
g3981	15.5257389557081	25.9761070698877	16.2262758182275	86.0444183528253	66.8987408721808	86.8142538951322
g3982	121.100763854523	81.175334593399	51.924082618328	57.9604762515559	49.5546228682821	33.8237352838177
g3983	65.2081036139738	32.4701338373596	90.867144582074	96.2024399639227	92.9149178780289	89.06916958072
g3984	18.6308867468497	45.4581873723035	35.6978068001005	114.128360454095	128.842019457533	122.892904864538
g3985	3.10514779114161	3.24701338373596	12.981020654582	13.7432057091318	13.0080885029241	29.877632834039
g3986	652.081036139739	370.1595257459	444.599957419434	865.224428992299	950.829326285163	785.838116427366
g3987	468.877316462383	535.757208316434	535.467102001508	843.713324404093	639.254635000839	695.077760082455
g3988	1288.63633332377	1805.33944135719	1346.78089291288	2066.26110183382	1932.630291863	1898.07527834357
g3989	363.302291563569	526.016168165226	454.33572291037	1112.60213175667	979.942667220279	968.486286959981
g3990	0	0	19.471530981873	0	4.95546228682821	7.89220489955747
g3991	450.246429715534	685.119823968288	347.242302510068	277.851767597665	239.101055339461	287.501749912451
g10808	43596.2749876282	40701.3127651303	50281.9835055234	3491.37178080249	2765.767388836	5525.10715861163
g10809	80.7338425696819	107.151441663287	331.016026691841	157.748100313513	198.837924258982	178.702068082837
g10810	0	0	0	0	2.47773114341411	0
g10811	86.9441381519651	81.175334593399	87.6218894184285	135.041934359295	181.493806255083	149.951893091592
g10812	12.4205911645664	6.49402676747192	29.2072964728095	52.5827001045044	44.5991605814539	61.4464524322689
g10813	27.9463301202745	16.2350669186798	6.490510327291	41.8271478104012	37.1659671512116	51.8630607685205
g10814	0	0	0	2.39012273202293	4.33602950097468	0
g10815	34.1566257025577	32.4701338373596	12.981020654582	16.7308591241605	36.546534365358	23.6766146986724
g10816	0	0	0	2.39012273202293	0	1.69118676419089
g10817	1027.80391886787	1198.14793859857	911.916700984386	815.031851619818	813.934680611534	649.415717449301
g3992	12.4205911645664	25.9761070698877	25.962041309164	114.128360454095	63.8015769429132	101.471205851453
g3993	15.5257389557081	29.2231204536237	32.452551636455	130.859219578255	141.850107960458	90.196627423514
g3994	6905.84868749894	5854.36513087594	7785.36713758555	4209.60366177538	3734.56026591091	4439.92898492248
g3995	96.25958152539	87.669361360871	87.6218894184285	130.859219578255	149.902734176553	151.643079855783
g3996	111.785320481098	94.1633881283429	45.433572291037	59.7530683005731	88.5788883770543	98.6525612444684
g3997	62.1029558228322	12.9880535349438	25.962041309164	151.17526280045	167.866284966306	131.348838685492
g3998	99.3647293165316	305.21925807118	295.318219891741	314.89866994402	198.837924258982	258.187845999809
g3999	49.6823646582658	142.868588884382	155.772247854984	148.187609385421	139.372376817043	132.476296528286
g4000	813.548721279102	1155.93676461	765.880218620338	1554.17730649791	1873.16474442106	1891.31053128681
g4001	534.085420076357	918.904787597277	778.86123927492	671.026957015436	739.60274630911	668.582500776797
g4002	701.763400798004	701.354890886968	408.902150619333	724.207187802946	806.501487181291	765.543875257075
g4003	971.911258627325	1230.61807243593	1268.89476898539	708.073859361792	714.825434874969	734.538784580242
g4004	4642.19594775671	4117.2129705772	5520.179033361	3420.86316020781	4462.3937892888	4623.14088437649
g4005	3841.06781764217	3266.49546403838	5380.63306132424	549.728228365273	451.566500887221	481.988227794403
g4006	282.568448993887	331.195365141068	366.713833491942	552.715881780302	466.432887747705	461.130257702715
g4007	0	9.74104015120789	0	2.98765341502866	2.47773114341411	1.69118676419089
g4008	102.469877107673	133.127548733174	71.395613600201	328.641875653152	273.169858561405	266.643779820763
g4009	1391.10621043144	1194.90092521483	1194.25390022154	1081.53053624037	1012.77260487052	953.265606082263
g4010	350.881700399002	506.53408786281	402.411640292042	827.579995962938	774.290982316908	799.367610540893
g4011	14941.9711709734	11789.9055963453	21801.6241893705	728.389902583987	595.274907205239	732.847597816051
g4012	41646.2421747913	26070.270458016	50856.3936694886	202.562901538943	219.898638978002	341.055997445162
g4013	1012.27817991217	1123.46663077264	1006.02910073011	1220.75518538071	1148.42838497244	1262.1890550078
g10818	0	3.24701338373596	0	29.8765341502866	21.0607147190199	15.7844097991149
g10819	0	0	12.981020654582	1.79259204901719	0	1.69118676419089
g10820	0	0	12.981020654582	0	0	5.63728921396962
g10821	0	3.24701338373596	0	16.1333284411547	8.05262621609584	5.63728921396962
g10822	0	0	0	1.79259204901719	0.619432785853526	2.81864460698481
g10823	0	0	0	0	0	0
g10824	0	0	3.2452551636455	0	0	0
g10825	161.467685139364	282.490164385029	181.734289164148	55.570353519533	52.6517867975497	63.7013681178567
g10826	0	0	0	0	0	0
g4014	1636.41288593163	1149.44273784253	1447.38380298589	406.918395126903	1129.84540139683	1217.65447021744
g4015	68.3132514051155	22.7290936861517	38.943061963746	219.293760663103	201.93508818825	174.755965633058
g4016	3055.46542648335	4474.38444278815	3070.01138480864	1029.54536681888	831.898231401286	1287.55685647066
g4017	524.769976702932	418.864726501939	457.580978074015	421.259131519041	384.048327229186	357.404136165674
g4018	0	0	12.981020654582	21.5111045882063	33.4493704360904	23.6766146986724
g4019	1002.96273653874	519.522141397754	1324.06410676736	31.6691261993038	22.2995802907269	51.2993318471236
g4020	7803.23639913887	4802.33279454549	12357.9316631621	105.165400209009	122.647691598998	285.81056314826
g4021	683.132514051155	772.789185329159	902.180935493449	56.7654148855445	32.2105048643834	88.5054406593231
g4022	65.2081036139738	113.645468430759	71.395613600201	60.9481296665846	71.2347703731555	88.5054406593231
g4023	189.414015259638	259.761070698877	217.432095964249	139.822179823341	138.75294403119	167.427489654898
g4024	80.7338425696819	48.7052007560394	35.6978068001005	108.153053624037	82.384560518519	140.932230349241
g4025	12467.1683814336	11630.8019405422	10293.9493790835	688.355346822603	647.307261216935	967.358829117187
g4026	1847.56293572926	892.928680527389	1353.27140324017	288.009789208763	374.756835441383	406.44855232721
g4027	226.675788753338	42.2111739885675	194.71530981873	91.4221944998769	189.546432471179	101.471205851453
g4028	0	6.49402676747192	12.981020654582	4.18271478104012	11.1497901453635	7.32847597816051
g4029	46.5772168671242	35.7171472210956	55.1693377819735	87.2394797188368	94.153783449736	115.564428886377
g4030	0	12.9880535349438	0	3.58518409803439	5.57489507268174	10.1471205851453
g4031	329.145665861011	191.573789640422	402.411640292042	363.89618595049	398.295281303817	308.359720004138
g4032	375.722882728135	178.585736105478	184.979544327793	16.1333284411547	21.0607147190199	16.3481387205119
g4033	4105.00537988921	2604.10473375624	4235.05798855738	352.543102973382	712.347703731555	912.677123741682
g4034	0	0	0	0	0	0
g4035	27.9463301202745	0	12.981020654582	0.597530683005731	7.43319343024232	9.58339166374836
g4036	96.25958152539	168.84469595427	256.375157927995	238.414742519287	303.522065068228	257.060388157015
g4037	596.18837589919	370.1595257459	834.030577056894	714.646696874855	1075.95474902758	1082.92325800356
g4038	6.21029558228322	3.24701338373596	16.2262758182275	23.3036966372235	42.1214294380398	27.6227171484512
g4039	683.132514051155	782.530225480367	863.237873529703	322.069038140089	322.724481429687	339.364810680971
g4040	9.31544337342484	42.2111739885675	19.471530981873	19.1209818561834	9.29149178780289	19.1667833274967
g10827	0	0	0	0	0.619432785853526	0
g10828	0	0	0	0	0	0
g10829	142.836798392514	97.4104015120788	116.829185891238	44.2172705424241	34.0688032219439	39.4610244977874
g10830	0	0	0	0.597530683005731	0.619432785853526	3.38237352838177
g4041	90.0492859431068	51.9522141397754	81.1313790911375	74.6913353757164	83.623426090226	54.1179764541084
g4042	760.761208829695	396.135632815787	824.294811565957	967.402175786279	864.728169051523	617.846897851071
g4043	139.731650601373	113.645468430759	142.791227200402	253.950540277436	256.44517334336	249.168183257457
g4044	375.722882728135	548.745261851378	499.769295201407	1362.96748793607	1066.04382445392	1121.82055357996
g4045	15.5257389557081	97.4104015120788	74.6408687638465	60.9481296665846	51.4129212258427	65.9562838034446
g4046	201.834606424205	237.031977012725	181.734289164148	236.024619787264	260.161770058481	246.349538650473
g4047	1024.69877107673	733.825024724327	1064.44369367572	1180.12309893632	1173.82512919243	970.177473724172
g4048	99.3647293165316	48.7052007560394	74.6408687638465	271.278930084602	306.619228997495	294.830225890611
g4049	198.729458633063	347.430432059748	305.053985382677	265.303623254545	326.441078144808	331.472605781414
g4050	2766.68668190718	1931.9729633229	5004.18346234136	247.975233447379	233.526160266779	285.81056314826
g4051	1891.03500480524	1357.25159440163	3459.4420044461	140.419710506347	156.716494820942	183.211899454013
g4052	316.725074696444	389.641606048315	230.413116618831	604.103520518794	604.566398993042	547.38078267645
g4053	459.561873088959	409.123686350731	454.33572291037	555.106004512324	416.25883209357	470.149920445067
g4054	83.8389903608235	61.6932542909833	139.545972036756	234.829558421252	236.623324196047	171.937321026074
g4055	1266.90029878578	1717.67007999632	1992.58667047834	1131.72311361286	1100.11262767586	980.888323230714
g4056	4710.50919916183	3295.718584492	5494.21699205183	1863.69820029488	2335.88103545365	2435.30894043488
g4057	1425.262836134	827.98841285267	2245.71657324269	157.150569630507	254.586874985799	281.300731777084
g4058	1338.31869798203	866.952573457502	1888.73850524168	512.681326018918	713.586569303262	688.313013025691
g4059	52.7875124494074	110.398455047023	113.583930727593	148.187609385421	115.214498168756	97.5251034016745
g4060	1285.53118553263	1071.51441663287	1207.23492087613	1009.22932359668	966.934578717355	974.123576173951
g4061	80.7338425696819	103.904428279551	146.036482364048	253.35300959443	238.481622553608	239.021062672312
g4062	133.521355019089	94.1633881283429	71.395613600201	191.209818561834	139.372376817043	147.696977406004
g4063	0	0	0	0	0	0
g4064	422.300099595259	509.781101246546	223.922606291539	289.204850574774	266.97553070287	237.893604829518
g4065	357.091995981285	256.514057315141	188.224799491439	414.686294005978	447.230471386246	385.590582235522
g4066	158.362537348222	64.9402676747192	136.300716873111	47.8024546404585	63.8015769429132	98.0888323230714
g4067	15.5257389557081	38.9641606048315	29.2072964728095	40.034555761384	84.8622916619331	68.2111994890324
g4068	55.892660240549	71.4342944421912	87.6218894184285	100.982685427969	101.586976879978	100.907476930056
g4069	43.4720690759826	116.892481814495	77.886123927492	97.9950320129399	96.0120818072966	101.471205851453
g4070	121.100763854523	84.422347977135	94.1123997457195	100.982685427969	88.5788883770543	102.598663694247
g4071	748.340617665129	1026.05622926056	1096.89624531218	398.552965564823	477.582677893069	505.664842493075
g4072	3244.87944174298	2126.79376634705	3362.08434953674	841.920732355075	923.574283707608	1033.31511292063
g10831	0	0	0	0	0	1.12745784279392
g10832	0	0	0	0	0	0
g10833	18.6308867468497	0	12.981020654582	5.37777614705158	18.5829835756058	18.6030544060998
g10834	801.128130114536	668.884757049608	486.788274546825	785.752848152537	1090.82113588806	1025.42290802107
g10835	0	0	0	0	0	0
g10836	0	0	0	0.597530683005731	6.19432785853526	2.81864460698481
g4073	263.937562247037	194.820803024158	376.449598982878	460.098625914413	270.692127417991	265.516321977969
g4074	329.145665861011	198.067816407894	275.846688909868	253.950540277436	208.129416046785	196.74139356754
g4075	117.995616063381	165.597682570534	155.772247854984	394.967781466788	367.323642011141	361.350238615453
g4076	636.55529718403	1090.99649693528	639.315267238164	1688.02417949119	2145.09573741076	2213.76347432587
g4077	928.439189551342	1110.4785772377	902.180935493449	1216.57247059967	1253.73195856754	1126.33038495113
g4078	145.941946183656	188.326776256686	94.1123997457195	396.1628428328	417.497697665277	399.683805270446
g4079	108.680172689956	207.808856559102	123.319696218529	492.962813479728	455.283097602342	400.247534191843
g4080	1710.93643291903	2162.51091356815	1791.38085033232	786.947909518548	511.651481115013	823.607954160962
g4081	1794.77542327985	1935.21997670663	2268.4333593882	172.686367388656	189.546432471179	147.133248484607
g4082	31951.9707708472	25745.5691196424	41545.7566049897	8401.87893374359	7964.66676050464	6191.43474370284
g4083	608.608967063756	441.593820188091	629.579501747227	465.476402061465	418.736563236984	388.972955763904
g4084	732.81487870942	707.84891765444	791.842259929502	911.831822266746	712.967136517409	687.185555182897
g4085	1179.95616063381	1815.0804815084	1486.32686494964	2309.45608981715	2145.71517019661	2232.36652873197
g4086	403.66921284841	305.21925807118	421.883171273915	724.207187802946	767.477221672519	775.127266920823
g4087	65.2081036139738	45.4581873723035	35.6978068001005	197.782656074897	216.801475048734	170.246134261883
g4088	124.205911645664	94.1633881283429	87.6218894184285	560.483780659376	437.31954681259	399.120076349049
g4089	102.469877107673	126.633521965702	110.338675563947	234.232027738247	241.578786482875	218.726821502021
g4090	3642.33835900911	3234.02533020102	7292.08835271144	677.002263845494	766.857788886666	883.926948750437
g4091	161.467685139364	211.055869942838	110.338675563947	342.98261204529	268.214396274577	244.094622964885
g4092	3468.45008270518	2529.42342593031	4134.45507848437	54.9728228365273	81.7651277326655	220.981737187609
g4093	52.7875124494074	68.1872810584552	42.1883171273915	44.2172705424241	68.1376064438879	88.5054406593231
g4094	0	0	0	5.37777614705158	0	0
g10837	0	0	0	0	0	2.25491568558785
g10838	403.66921284841	139.621575500646	331.016026691841	141.614771872358	318.388451928713	296.521412654802
g10839	37.2617734936993	32.4701338373596	38.943061963746	587.97019207764	277.50588806238	461.130257702715
g10840	3.10514779114161	0	0	0	0	0
g10841	74.5235469873987	55.1992275235113	48.6788274546825	45.4123319084356	91.6760523063219	57.5003499824902
g10842	0	12.9880535349438	6.490510327291	31.6691261993038	40.8825638663327	62.5739102750628
g10843	838.389903608235	863.705560073766	1259.15900349445	645.930668329196	548.817448266224	1214.83582561045
g10844	18.6308867468497	9.74104015120789	9.7357654909365	74.0938046927107	70.615337587302	70.4661151746203
g10845	0	0	6.490510327291	7.17036819606878	6.19432785853526	7.32847597816051
g10846	3.10514779114161	0	0	115.920952503112	34.6882360077975	46.7895004759479
g4095	568.242045778915	561.733315386321	428.373681601206	246.780172081367	263.878366773602	288.629207755245
g4096	173.88827630393	188.326776256686	223.922606291539	330.434467702169	309.09696014091	348.94820234472
g4097	782.497243367686	707.84891765444	356.978068001005	927.965150707901	913.663359133951	937.481196283148
g4098	40.366921284841	77.9283212096631	9.7357654909365	77.6789887907451	84.2428588760796	93.5790009518958
g4099	1679.88495500761	1704.68202646138	1664.81589895014	1457.37733585098	1526.28238434309	1267.82634422177
g4100	779.392095576545	668.884757049608	545.202867492444	974.572543982348	804.023756037877	744.12217624399
g4101	108.680172689956	113.645468430759	100.602910073011	214.513515199058	211.846012761906	238.457333750915
g4102	276.358153411603	272.749124233821	223.922606291539	207.940677685995	224.85410126483	196.177664646143
g4103	341.566257025577	399.382646199523	415.392660946624	428.429499715109	222.995802907269	402.502449877431
g4104	90.0492859431068	113.645468430759	129.81020654582	135.041934359295	182.73267182679	126.839007314317
g4105	108.680172689956	198.067816407894	223.922606291539	325.056691555118	246.534248769703	264.952593056572
g4106	211.15004979763	318.207311606124	155.772247854984	445.16035883927	387.145491158454	340.492268523765
g4107	3881.43473892702	4230.85843900796	3469.17776993704	3262.51752921129	2967.08304423839	2929.69920450001
g4108	1021.59362328559	834.482439620142	908.67144582074	663.856588819368	649.784992360349	629.12147627901
g4109	779.392095576545	759.801131794215	597.126950110772	607.688704616829	597.133205562799	643.778428235331
g4110	10116.5715035394	10747.614300166	14441.3854782225	947.086132564084	691.286989012535	1065.44766144026
g4111	2456.17190279302	1873.52672241565	2618.92091706192	601.115867103766	712.967136517409	664.636398327019
g4112	1996.61002970406	5851.1181174922	4303.20834699393	373.456676878582	316.530153571152	297.648870497596
g4113	20748.5975404083	24446.7637661481	23044.5569170467	24134.2642866015	24995.9712075473	27530.2656053421
g4114	49.6823646582658	74.6813078259271	84.376634254783	127.871566163227	110.878468667781	112.182055357996
g4115	614.819262646039	707.84891765444	811.313790911375	358.518409803439	253.348009414092	240.712249436503
g4116	254.622118873612	327.948351757332	201.205820146021	345.372734777313	363.60704529602	396.865160663461
g4117	27.9463301202745	55.1992275235113	35.6978068001005	50.7901080554872	77.4290982316908	56.3728921396962
g4118	43.4720690759826	16.2350669186798	9.7357654909365	70.5086205946763	75.5707998741302	140.368501427844
g10847	475.087612044667	353.92445882722	522.486081346926	158.345630996519	231.048429123365	153.897995541371
g10848	0	0	0	0	0	0
g10849	298.094187949595	181.832749489214	171.998523673212	402.138149662857	332.01597321749	242.403436200694
g10850	58.9978080316906	64.9402676747192	45.433572291037	230.646843640212	179.635507897523	262.133948449587
g10851	916.018598386776	782.530225480367	723.691901492946	486.389975966665	559.347805625734	478.042125344624
g4119	1825.82690119127	2233.94520801034	1681.04217476837	2417.01161275818	2464.10362212533	2332.14654781923
g4120	0	0	0	0	0	0
g4121	5232.17402807362	4263.32857284532	5202.14402732374	491.170221430711	507.934884399892	521.44925229219
g4122	71.4183991962571	35.7171472210956	87.6218894184285	7.17036819606878	83.0039933043725	77.2308622313838
g4123	254.622118873612	457.828887106771	412.147405782979	968.597237152291	756.946864313009	667.455042934003
g4124	83.8389903608235	81.175334593399	71.395613600201	16.1333284411547	16.7246852180452	23.1128857772755
g4125	819.759016861386	1019.56220249309	973.57654909365	905.856515436689	643.590664501814	683.239452733118
g4126	0	0	0	0	1.23886557170705	2.25491568558785
g4127	465.772168671242	168.84469595427	483.54301938318	76.4839274247336	60.7044130136456	191.10410435357
g4128	2732.53005620462	1324.78146056427	3105.70919160874	1490.8390540993	2392.86885175217	1657.36302890707
g4129	173.88827630393	90.9163747446069	123.319696218529	184.039450365765	184.590970184351	176.447152397249
g4130	0	0	0	7.76789887907451	6.19432785853526	9.0196627423514
g4131	0	0	0	0	0.619432785853526	0.563728921396962
g4132	0	0	0	5.37777614705158	6.81376064438879	6.20101813536659
g4133	0	0	0	0	0	0.563728921396962
g4134	0	0	0	1.19506136601146	0	0
g4135	0	0	0	0	0	0
g4136	0	0	0	0	0	0
g4137	0	0	0	0	1.85829835756058	0
g4138	1245.16426424779	698.107877503232	1268.89476898539	409.906048541932	338.210301076025	358.531594008468
g4139	40.366921284841	55.1992275235113	61.6598481092645	93.2147865488941	104.684140809246	99.2162901658654
g4140	521.664828911791	792.271265631575	558.183888147026	105.762930892014	198.837924258982	220.981737187609
g4141	74.5235469873987	6.49402676747192	103.848165236656	2.39012273202293	0	2.81864460698481
g4142	6.21029558228322	22.7290936861517	9.7357654909365	57.3629455685502	45.2185933673074	39.4610244977874
g4143	0	0	0	0	0	0
g4144	0	0	0	0	0	0
g4145	145.941946183656	68.1872810584552	181.734289164148	122.493790016175	125.744855528266	117.819344571965
g4146	0	0	0	0	0	2.81864460698481
g4147	15.5257389557081	0	0	0.597530683005731	1.85829835756058	2.81864460698481
g4148	0	0	0	0	0	0
g4149	198.729458633063	107.151441663287	175.243778836857	103.970338842997	173.441180038987	133.040025449683
g4150	0	0	0	0	0	0
g10852	46.5772168671242	38.9641606048315	32.452551636455	48.3999853234642	69.9959048014485	40.5884823405813
g10853	0	9.74104015120789	0	0	3.71659671512116	0.563728921396962
g10854	18.6308867468497	0	0	0	0	0
g10855	0	0	0	0	0	0
g10856	0	0	0	0	0	0
g10857	0	0	0	0	0	0
g4151	0	0	0	2.39012273202293	1.23886557170705	3.38237352838177
g4152	21.7360345379913	3.24701338373596	12.981020654582	7.76789887907451	2.47773114341411	2.81864460698481
g4153	1900.35044817867	3695.10123069152	2365.79101429757	1559.55508264496	699.339615228631	1189.46802414759
g4154	6983.47738227749	4386.71508142728	5523.42428852464	1547.00693830184	1456.90591232749	2011.38479154436
g4155	0	3.24701338373596	0	0	0	0
g4156	21540.4102271494	20196.4232468377	20834.5381506041	3475.83598304434	2185.97830127709	3155.7545019802
g4157	490.613351000375	441.593820188091	340.751792182778	560.483780659376	418.736563236984	1160.15412023495
g4158	288.77874457617	522.76915478149	298.563475055386	261.71843915651	213.704311119467	177.010881318646
g4159	183.203719677355	201.31482979163	217.432095964249	546.740574950244	462.716291032584	462.257715545509
g4160	217.360345379913	399.382646199523	171.998523673212	188.222165146805	186.449268541911	187.158001903792
g4161	1583.62537348222	1522.84927697217	1651.83487829556	1722.08342842252	1613.62240714844	1572.23996177613
g4162	226.675788753338	159.103655803062	295.318219891741	293.98509603882	291.133409351157	217.599363659227
g4163	21.7360345379913	9.74104015120789	0	475.634423672562	618.193920281819	493.262806222342
g4164	919.123746177917	1081.25545678408	911.916700984386	2188.75489184999	2296.23733715902	2068.32141260545
g4165	114.89046827224	259.761070698877	113.583930727593	237.219681153275	232.906727480926	215.34444797364
g657	24.8411823291329	29.2231204536237	38.943061963746	84.8493569868138	66.2793080863273	40.0247534191843
g658	0	0	0	1.19506136601146	0.619432785853526	1.69118676419089
g659	530.980272285216	620.179556293569	515.995571019635	281.436951695699	375.99570101309	360.786509694056
g660	310.514779114161	243.526003780197	249.884647600704	457.70850318239	483.777005751604	424.487877811913
g661	1083.69657910842	1250.10015273835	1330.55461709465	616.054134178909	620.671651425233	586.278078252841
g662	543.400863449782	626.673583061041	418.637916110269	475.036892989556	474.485513963801	427.870251340294
g663	99.3647293165316	194.820803024158	159.017503018629	117.116013869123	136.894645673629	125.147820550126
g664	943.96492850705	1191.6539118311	811.313790911375	578.409701149548	570.497595771098	647.160801763713
g665	217.360345379913	370.1595257459	178.489034000502	491.767752113717	403.250743590646	382.771937628537
g666	74.5235469873987	120.139495198231	45.433572291037	109.945645673055	124.505989956559	117.819344571965
g667	31.0514779114161	35.7171472210956	25.962041309164	53.7777614705158	66.8987408721808	60.8827235108719
g668	807.338425696819	899.422707294861	762.634963456693	412.89370195696	389.003789516015	505.101113571678
g669	8275.2188633924	5662.79134123552	8229.96709500499	522.839347630015	536.428792549154	966.231371274393
g670	602.398671481473	847.470493155086	444.599957419434	829.372588011955	675.801169366197	628.557747357613
g671	263.937562247037	149.362615651854	340.751792182778	32.2666568823095	35.307668793651	29.877632834039
g672	58.9978080316906	6.49402676747192	45.433572291037	7.17036819606878	8.67205900194937	11.8383073493362
g673	74.5235469873987	3.24701338373596	262.865668255286	22.7061659542178	21.0607147190199	18.0393254847028
g674	3074.0963132302	2649.56292112854	2537.78953797078	1025.96018272084	877.116824768593	917.750684034255
g675	5036.54971723169	4071.7547832049	5653.23449507046	1423.31808691965	1632.20539072404	1508.53859365827
g676	40.366921284841	55.1992275235113	81.1313790911375	109.348114990049	109.639603096074	155.025453384165
g677	347.776552607861	298.725231303708	509.505060692344	471.451708891522	605.185831778895	515.811963078221
g678	83.8389903608235	42.2111739885675	94.1123997457195	85.4468876698196	93.5343506638825	120.63798917895
g679	127.311059436806	139.621575500646	107.093420400301	195.392533342874	246.534248769703	182.648170532616
g680	326.040518069869	425.358753269411	577.655419128899	348.360388192341	325.821645358955	350.075660187514
g681	13671.9657243965	14679.7475078703	13776.1081696751	7472.71872166968	9000.35837845174	9260.3749917879
g682	201.834606424205	214.302883326573	165.508013345921	231.841905006224	188.926999685326	215.908176895037
g683	282.568448993887	405.876672966995	353.73281283736	217.501168614086	311.574691284324	240.712249436503
g684	8635.41600716482	7636.97547854698	9680.59615315453	976.365136031365	947.112729570042	1024.85917909968
g685	291.883892367312	431.852780036883	236.903626946122	337.604835898238	411.922802592595	278.482087170099
g686	2111.5004979763	1883.26776256686	2894.76760597179	3417.27797610978	3358.56456489782	3367.15284750406
g687	5753.83885698541	12923.1132672691	6811.7905884919	8050.53089213622	4111.79483249571	4993.51078573429
g688	1471.84005300112	1526.0962903559	1891.98376040533	2818.55223173803	1948.73554429519	2044.08106898539
g689	0	0	0	0	0	0
g690	217.360345379913	146.115602268118	288.827709564449	93.2147865488941	141.230675174604	175.883423475852
g691	363.302291563569	691.61385073576	395.921129964751	419.466539470023	515.987510615987	737.921158108624
g692	267.042710038179	217.549896710309	146.036482364048	411.698640590949	469.530051676973	453.801781724555
g693	74.5235469873987	165.597682570534	113.583930727593	421.259131519041	383.428894443333	414.904486148164
g694	58.9978080316906	81.175334593399	58.414592945619	185.832042414782	245.91481598385	196.177664646143
g695	7256.73038789795	9825.46249918502	7662.04744136703	8239.35058796603	9842.16753442668	9300.39974520709
g696	3530.55303852801	3318.44767817815	3378.31062535497	1961.09570162481	2079.43586211029	2497.31912178854
g697	3.10514779114161	16.2350669186798	6.490510327291	48.3999853234642	61.9432785853526	49.0444161615357
g698	409.879508430693	246.773017163933	175.243778836857	425.441846300081	397.05641573211	385.590582235522
g699	3098.93749555933	2860.61879107138	2784.42893040784	860.444183528253	874.019660839326	1403.68501427844
g700	310.514779114161	136.37456211691	321.280261200905	537.777614705158	1004.10054586857	862.505249737352
g701	1077.48628352614	1250.10015273835	1249.42323800352	3013.94476508091	3207.42296514956	3111.21991718984
g702	1183.06130842495	1126.71364415638	775.615984111275	493.560344162734	504.837720470624	533.851288562923
g703	0	0	0	10.1580216110974	6.19432785853526	5.07356029257266
g704	2120.81594134972	1756.63424060116	2369.03626946121	387.79741327072	389.623222301868	530.468915034542
g10858	0	0	0	0	0	0
g10859	3.10514779114161	0	0	5.37777614705158	1.23886557170705	3.94610244977874
g10860	0	0	0	0	0	0
g4166	6176.13895658067	5997.23371976032	7071.41100158354	3268.49283604135	3647.83967589142	3557.69322293623
g4167	0	0	0	0	0	0
g4168	2477.90793733101	2724.24422895447	2547.52530346172	1415.55018804058	1072.85758509831	1412.70467702079
g4169	5092.44237747224	3428.84613322518	5273.53964092394	1419.13537213861	1585.74793178503	1546.30843139187
g4170	12.4205911645664	19.4820803024158	6.490510327291	14.3407363921376	6.19432785853526	5.63728921396962
g4171	124.205911645664	217.549896710309	110.338675563947	173.283898071662	186.449268541911	145.442061720416
g4172	77.6286947785403	136.37456211691	87.6218894184285	348.360388192341	384.048327229186	320.761756274872
g4173	658.291331722022	818.247372701462	678.25832920191	1096.46880331552	879.594555912007	737.921158108624
g4174	71.4183991962571	68.1872810584552	45.433572291037	108.750584307043	104.684140809246	111.618326436599
g4175	245.306675500187	246.773017163933	285.582454400804	398.552965564823	374.13740265553	369.24244351501
g4176	22170.7552287511	21845.9060457756	26322.2646323286	4411.56903263131	4585.0414808878	3601.66407880519
g4177	267.042710038179	337.68939190854	356.978068001005	769.021989028376	580.408520344754	692.25911547547
g4178	55.892660240549	74.6813078259271	71.395613600201	85.4468876698196	75.5707998741302	92.4515431091018
g4179	686.237661842296	922.151800981013	726.937156656592	376.444330293611	411.922802592595	392.919058213683
g4180	127.311059436806	120.139495198231	103.848165236656	128.469096846232	154.858196463382	112.182055357996
g4181	1391.10621043144	1237.1120992034	1593.42028534994	803.678768642709	705.533943087166	740.176073794212
g4182	251.516971082471	90.9163747446069	363.468578328296	298.765341502866	218.040340620441	290.320394519436
g4183	31.0514779114161	87.669361360871	32.452551636455	141.017241189353	130.080885029241	77.2308622313838
g4184	0	12.9880535349438	0	10.7555522941032	5.57489507268174	5.07356029257266
g4185	9812.26702000749	8413.01167725988	8356.53204638716	1645.59950099778	1640.25801694014	1421.16061084174
g4186	5017.91883048484	4016.55555568138	6584.62272703672	3514.07794675671	4357.0902156937	4512.08628686129
g4187	291.883892367312	263.008084082613	331.016026691841	326.849283604135	284.319648706769	325.271587646047
g4188	245.306675500187	275.996137617557	343.997047346423	396.760373515806	380.951163299919	410.958383698386
g4189	397.458917266126	474.06395402545	389.43061963746	381.822106440662	414.400533736009	339.364810680971
g4190	242.201527709046	321.45432498986	191.470054655085	571.239332953479	722.878061091065	556.964174340199
g4191	0	0	0	0	0	0
g10861	0	0	0	1.19506136601146	0	0
g10862	0	0	6.490510327291	0	1.85829835756058	6.20101813536659
g10863	0	3.24701338373596	0	4.18271478104012	0	0
g10864	24.8411823291329	16.2350669186798	0	1.19506136601146	9.91092457365642	3.38237352838177
g10865	0	0	0	0	3.71659671512116	0
g10866	105.575024898815	100.657414895815	103.848165236656	94.4098479149056	169.105150538013	117.255615650568
g4192	288.77874457617	214.302883326573	162.262758182275	335.214713166215	272.550425775552	288.629207755245
g4193	3223.14340720499	5377.05416346675	2859.06979917169	15257.9459905514	14894.261335848	16449.046197442
g4194	279.463301202745	451.334860339299	207.696330473312	110.54317635606	115.833930954609	98.0888323230714
g4195	804.233277905677	724.083984573119	431.618936764852	709.866451410809	682.614930010586	713.680814488554
g4196	353.986848190144	227.290936861517	184.979544327793	187.6246344638	203.173953759957	214.780719052243
g4197	32069.9663869106	25002.0030547669	34234.1967212964	973.975013299342	842.428588760796	2559.89303206361
g4198	52.7875124494074	58.4462409072473	64.90510327291	169.101183290622	146.805570247286	146.005790641813
g4199	105.575024898815	58.4462409072473	16.2262758182275	144.004894604381	148.663868604846	119.510531336156
g4200	40.366921284841	22.7290936861517	38.943061963746	134.44440367629	97.2509473790036	219.290550423418
g4201	3238.6691461607	1555.31941080953	3355.59383920945	651.308444476247	721.639195519358	875.471014929483
g4202	388.143473892701	435.099793420619	541.957612328799	381.822106440662	447.8499041721	481.424498873006
g4203	841.495051399377	250.020030547669	2184.05672513342	432.612214496149	414.400533736009	248.040725414663
g4204	0	0	0	0	0	0
g4205	49.6823646582658	58.4462409072473	45.433572291037	120.103667284152	126.364288314119	109.927139672408
g4206	0	0	0	4.78024546404585	2.47773114341411	1.12745784279392
g4207	62.1029558228322	25.9761070698877	42.1883171273915	7.17036819606878	6.19432785853526	7.32847597816051
g4208	422.300099595259	418.864726501939	246.639392437058	362.701124584479	398.295281303817	317.943111667887
g4209	540.29571565864	490.29902094413	567.919653637962	270.083868718591	517.845808973548	418.850588597943
g4210	40.366921284841	74.6813078259271	48.6788274546825	152.967854849467	109.020170310221	154.461724462768
g4211	695.553105215721	821.494386085198	720.446646329301	539.570206754175	518.465241759401	522.012981213587
g10867	0	0	0	0	0	1.12745784279392
g10868	11616.3578866608	7325.26219370833	9502.10711915402	2457.04616851957	3152.2934472086	3223.40197254783
g10869	0	0	0	0	2.47773114341411	0
g10870	40.366921284841	22.7290936861517	42.1883171273915	48.99751600647	16.7246852180452	14.656951956321
g4212	1543.25845219738	772.789185329159	791.842259929502	170.296244656633	242.198219268729	220.418008266212
g4213	0	0	19.471530981873	2.39012273202293	8.05262621609584	13.5294941135271
g4214	158.362537348222	149.362615651854	146.036482364048	240.207334568304	245.91481598385	251.986827864442
g4215	506.139089956083	409.123686350731	373.204343819233	595.738090956714	581.647385916461	536.669933169908
g4216	0	0	0	5.37777614705158	3.71659671512116	6.76474705676355
g4217	68.3132514051155	87.669361360871	87.6218894184285	79.4715808397623	72.4736359448626	77.7945911527808
g4218	9706.69199510868	12754.2685713149	9073.73343755282	11975.1124181179	14352.2576482262	14359.8668147448
g4219	1307.26722007062	1405.95679515767	1210.48017603977	415.283824688983	433.602950097468	495.51772190793
g4220	2990.25732286937	3506.77445443484	2982.38949539021	2853.20901135237	2046.60592446005	2262.24416156601
g4221	4325.47087306027	4185.40025163565	3904.04196186554	1515.33781210253	1344.16914530215	1609.44607058833
g4222	0	0	0	17.9259204901719	6.81376064438879	16.9118676419089
g4223	521.664828911791	763.048145177951	499.769295201407	555.70353519533	555.631208910613	611.645879715704
g4224	189.414015259638	282.490164385029	201.205820146021	232.439435689229	191.40473082874	149.951893091592
g4225	574.452341361198	652.649690130928	545.202867492444	628.004747839024	620.05221863938	540.05230669829
g4226	375.722882728135	240.278990396461	460.826233237661	377.041860976616	505.457153256477	595.861469916589
g4227	139.731650601373	178.585736105478	136.300716873111	832.360241426984	676.420602152051	503.973655728884
g4228	394.353769474985	464.322913874242	373.204343819233	626.212155790006	660.315349719859	586.841807174238
g4229	1307.26722007062	1558.56642419326	1191.0086450579	1478.88844043919	1222.14088648901	1399.73891182866
g4230	2962.3109927491	4506.85457662551	3134.91648808155	3508.70017060965	3666.42265946702	3971.4702512416
g4231	229.780936544479	548.745261851378	282.337199237159	590.957845492668	539.525956478421	566.547566003947
g10871	223.570640962196	162.350669186798	184.979544327793	270.681399401596	221.137504549709	240.148520515106
g10872	34.1566257025577	22.7290936861517	16.2262758182275	27.4864114182636	38.4048327229186	35.5149220480086
g4232	704.868548589146	571.474355537529	467.316743564952	697.318307067688	512.89034668672	538.361119934099
g4233	24.8411823291329	9.74104015120789	12.981020654582	41.2296171273955	35.9271015795045	35.5149220480086
g4234	807.338425696819	629.920596444777	892.445170002513	759.461498100285	867.82533298079	878.853388457864
g4235	260.832414455895	279.243151001293	175.243778836857	430.819622447132	426.169756667226	401.938720956034
g4236	1080.59143131728	915.657774213541	869.728383856994	450.538134986321	468.910618891119	464.512631231097
g4237	552.716306823207	405.876672966995	639.315267238164	994.291056521537	1047.46084087831	918.314412955652
g4238	1375.58047147573	1331.27548733174	1359.76191356746	912.429352949752	926.052014851022	961.157810981821
g4239	0	0	0	0	0	0
g4240	176.993424095072	181.832749489214	142.791227200402	717.036819606878	668.367975935955	633.067578728789
g4241	58.9978080316906	116.892481814495	126.564951382174	259.925847107493	432.364084525761	343.874642052147
g4242	1670.56951163419	1548.82538404205	1648.58962313191	2053.7129574907	2437.46801233363	2033.37021947884
g4243	257.727266664754	269.502110850085	136.300716873111	246.780172081367	283.080783135062	257.060388157015
g4244	456.456725297817	347.430432059748	376.449598982878	695.525715018671	577.311356415487	604.881132658941
g4245	18.6308867468497	68.1872810584552	87.6218894184285	2.98765341502866	7.43319343024232	8.45593382095444
g4246	9088.7675846715	7471.37779597645	10095.9888141012	225.866598176166	246.534248769703	368.114985672216
g4247	456.456725297817	500.040061095338	441.354702255788	246.780172081367	252.728576628239	244.658351886282
g4248	77.6286947785403	168.84469595427	136.300716873111	176.271551486691	227.951265194098	179.829525925631
g4249	322.935370278728	487.052007560394	457.580978074015	243.792518666338	214.32374390532	229.437671008564
g4250	2446.85645941959	2996.99335318829	2067.22753924218	9222.88609219346	9969.15125552665	10253.101622368
g4251	273.253005620462	448.087846955563	220.677351127894	354.933225705404	353.07668793651	366.423798908026
g4252	1561.88933894423	1110.4785772377	1457.11956847683	353.140633656387	387.145491158454	475.787209659036
g4253	0	3.24701338373596	0	0	0	0
g4254	0	0	0	0	0	0
g4255	0	0	0	0	1.23886557170705	0
g10873	335.355961443294	120.139495198231	259.62041309164	204.35549358796	302.902632282374	289.756665598039
g10874	0	0	0	0	1.23886557170705	0
g10875	1058.85539677929	961.115961585845	1729.72100222305	1187.89099781539	1068.52155559733	832.627616903313
g10876	31.0514779114161	38.9641606048315	45.433572291037	40.6320864443897	34.0688032219439	48.4806872401388
g4256	3775.8597140282	5692.01446168914	3926.75874801106	11289.1471940273	5950.89077369483	7747.89029567985
g4257	139.731650601373	188.326776256686	256.375157927995	146.395017336404	126.983721099973	155.589182305562
g4258	614.819262646039	324.701338373596	658.786798220037	141.017241189353	141.850107960458	156.152911226959
g4259	7408.88262966389	9776.75729842898	7882.72479249492	7864.69884972144	9055.4878963927	9810.57441907134
g4260	8719.25499752565	10669.6859789564	8622.64296980609	9960.83648570554	11260.0491812454	11307.2747053803
g4261	122308.666345277	101803.610620274	121736.01169867	19587.6533196109	22732.5638080386	23930.8564422224
g4262	139.731650601373	159.103655803062	191.470054655085	175.674020803685	188.307566899472	180.956983768425
g4263	1204.79734296295	737.072038108063	1083.9152246576	507.303549871866	391.481520659429	548.508240519244
g4264	515.454533329508	633.167609828512	626.334246583581	911.831822266746	1233.29067663437	1064.88393251886
g4265	242.201527709046	237.031977012725	301.808730219032	214.513515199058	162.291389893624	171.373592104677
g4266	503.033942164941	558.486302002585	649.0510327291	448.745542937304	416.878264879423	447.037034667791
g4267	111.785320481098	292.231204536237	269.356178582576	269.486338035585	242.198219268729	312.305822453917
g4268	52.7875124494074	48.7052007560394	64.90510327291	96.2024399639227	71.854203159009	74.412217624399
g4269	99.3647293165316	129.880535349438	123.319696218529	194.795002659868	154.238763677528	117.255615650568
g4270	521.664828911791	665.637743665872	736.672922147529	614.261542129892	561.825536769148	559.782818947184
g4271	111.785320481098	71.4342944421912	25.962041309164	157.748100313513	131.939183386801	131.348838685492
g4272	139.731650601373	110.398455047023	110.338675563947	212.72092315004	229.190130765805	219.290550423418
g4273	388.143473892701	259.761070698877	139.545972036756	346.567796143324	400.153579661378	416.031943990958
g4274	2682.84769154635	3678.86616377284	2794.16469589878	2221.0215487323	1972.89342294348	1942.60986313393
g4275	248.411823291329	126.633521965702	107.093420400301	325.654222238124	273.169858561405	293.702768047817
g4276	6651.22656862533	2344.34366305736	7353.7482008207	759.461498100285	1223.37975206071	1546.87216031326
g4277	1189.27160400724	2133.28779311453	908.67144582074	4098.46295473631	3922.24840002453	3881.27362381809
g4278	1465.62975741884	2425.51899765076	1570.70349920442	5108.887339699	5120.8508406511	4762.94565688293
g4279	257.727266664754	181.832749489214	360.223323164651	111.140707039066	123.267124384852	147.133248484607
g4280	71.4183991962571	152.60962903559	149.281737527693	175.076490120679	144.947271889725	164.045116126516
g4281	0	74.6813078259271	100.602910073011	107.555522941032	79.2873965892514	94.1427298732927
g4282	2732.53005620462	3256.75442388717	2615.67566189827	3751.89515859299	5614.53877097636	6087.1448932444
g4283	1409.73709717829	1461.15602268118	1035.23639720291	2966.73984112346	3162.20437178225	2514.79471835185
g4284	6586.01846501136	2763.2083895593	5727.87536383431	3784.1618154753	2428.79595333168	1992.21800821686
g4285	0	0	0	0	0	0
g10877	2440.64616383731	2295.63846230133	2923.9749024446	1125.7478067828	969.412309860769	918.314412955652
g10878	0	0	0	0	0	0
g10879	0	0	0	0	0	0
g4286	2077.34387227374	4373.72702789234	3582.76170066463	5145.33671136235	3011.68220481985	3446.07489649963
g4287	0	6.49402676747192	6.490510327291	0	5.57489507268174	0.563728921396962
g4288	0	0	0	0	0	0
g4289	21.7360345379913	68.1872810584552	22.7167861455185	146.99254801941	145.566704675579	111.054597515202
g4290	397.458917266126	253.267043931405	567.919653637962	320.873976774078	341.926897791147	427.870251340294
g4291	412.984656221834	509.781101246546	399.166385128396	405.723333760892	372.279104297969	417.159401833752
g4292	344.671404816719	314.960298222388	100.602910073011	152.967854849467	135.655780101922	155.589182305562
g4293	127.311059436806	230.537950245253	142.791227200402	280.839421012694	146.186137461432	164.608845047913
g4294	0	6.49402676747192	0	0	0	0
g4295	316.725074696444	370.1595257459	311.544495709968	550.325759048279	413.781100950156	426.7427934975
g4296	0	0	0	14.3407363921376	6.81376064438879	32.6962774410238
g4297	58.9978080316906	126.633521965702	110.338675563947	209.135739052006	201.93508818825	195.613935724746
g4298	239.096379917904	256.514057315141	220.677351127894	226.464128859172	170.963448895573	189.976646510776
g4299	6284.81912927062	14708.9706283239	11825.7098163242	4842.98618576145	2396.58544846729	4510.3951000971
g4300	2304.01966102708	3159.34402237509	2310.6216765156	970.987359884313	777.388146246176	938.044925204545
g4301	18.6308867468497	16.2350669186798	61.6598481092645	40.6320864443897	43.9797277956004	71.5935730174142
g4302	580.662636943481	802.012305782783	759.389708293047	983.535504227434	805.262621609584	909.2947502133
g4303	6250.66250356807	4747.13356702198	6876.69569176481	766.631866296353	812.695815039826	1130.27648740091
g10880	0	0	0	0	0	0
g10881	0	6.49402676747192	0	0	0	1.12745784279392
g10882	655.18618393088	263.008084082613	379.694854146523	262.315969839516	367.323642011141	309.487177846932
g10883	18665.0433725522	23092.7591851302	19565.6433816187	15973.1902181092	15344.5889711636	16588.8509699484
g4304	0	0	0	1.79259204901719	0	1.69118676419089
g4305	695.553105215721	1003.32713557441	811.313790911375	1404.19710506347	1318.1529682963	1179.88463248384
g4306	145.941946183656	263.008084082613	84.376634254783	485.194914600654	400.773012447232	444.782118982203
g4307	574.452341361198	886.434653759918	872.97363902064	824.592342547909	642.351798930107	742.994718401196
g4308	751.44576545627	925.398814364749	1356.51665840382	285.022135793734	338.829733861879	388.972955763904
g4309	0	9.74104015120789	9.7357654909365	10.7555522941032	7.43319343024232	13.5294941135271
g4310	114.89046827224	64.9402676747192	87.6218894184285	145.199955970393	152.380465319967	164.045116126516
g4311	611.714114854898	701.354890886968	574.410163965254	623.822033057984	568.639297413537	577.822144431886
g4312	0	12.9880535349438	35.6978068001005	56.7654148855445	36.546534365358	32.1325485196269
g4313	21.7360345379913	6.49402676747192	12.981020654582	2.39012273202293	28.4939081492622	15.7844097991149
g4314	0	0	0	0	0	0
g4315	0	0	0	0	0	0
g4316	124.205911645664	207.808856559102	87.6218894184285	197.185125391891	264.497799559456	190.540375432173
g4317	4123.63626663606	4610.75900490507	5046.37177946875	618.444256910932	580.408520344754	817.970664946992
g4318	1794.77542327985	1623.50669186798	3021.33255735396	812.641728887795	751.991402026181	770.053706628251
g4319	360.197143772427	513.028114630282	1142.32981760322	573.629455685502	625.627113712062	639.832325785552
g4320	9629.06330033014	12179.5472023936	8496.07801842392	9683.58224879088	11222.8832140942	12356.3742281
g4321	350.881700399002	389.641606048315	548.448122656089	862.23677557727	708.011674230581	596.425198837986
g4322	400.564065057268	168.84469595427	369.959088655587	639.357830816132	1047.46084087831	848.975755623825
g4323	0	0	3.2452551636455	11.9506136601146	13.6275212887776	9.0196627423514
g4324	527.875124494074	490.29902094413	454.33572291037	518.059102165969	472.627215606241	516.939420921015
g4325	173.88827630393	321.45432498986	220.677351127894	320.276446091072	277.50588806238	264.952593056572
g4326	34.1566257025577	25.9761070698877	45.433572291037	64.533313764619	116.453363740463	88.5054406593231
g4327	1835.14234456469	2493.70627870922	3738.53394851962	13428.3070391878	14012.1890487926	14898.7916636003
g4328	798.022982323394	1691.69397292644	853.502108038767	2945.22873653525	1842.19310512839	2001.23767095922
g4329	652.081036139739	415.617713118203	665.277308547327	81.2641728887795	104.064708023392	129.657651921301
g10884	9.31544337342484	32.4701338373596	42.1883171273915	83.6542956208024	95.392649021443	82.3044225239565
g10885	0	6.49402676747192	0	0	1.85829835756058	0
g10886	7430.61866420188	6653.13042327499	9430.71150555382	5292.32925938176	4850.77814601896	4879.63754361211
g4330	0	0	0	0	0	0
g4331	0	0	0	0.597530683005731	9.91092457365642	3.94610244977874
g4332	18.6308867468497	9.74104015120789	32.452551636455	16.1333284411547	19.8218491473128	29.877632834039
g4333	0	0	0	0	0	1.69118676419089
g4334	9.31544337342484	0	3.2452551636455	0	0	0
g4335	40.366921284841	61.6932542909833	81.1313790911375	173.881428754668	133.178048958508	207.452243074082
g4336	1533.94300882396	1305.29938026186	1116.36777629405	690.14793887162	782.343608533004	699.023862532233
g4337	130.416207227948	126.633521965702	68.1503584365555	140.419710506347	99.7286785224177	88.5054406593231
g4338	86.9441381519651	84.422347977135	162.262758182275	223.476475444144	175.918911182401	125.711549471523
g4339	1589.83566906451	1623.50669186798	1554.47722338619	1239.27863655389	1103.20979160513	1029.36901047085
g4340	1655.04377267848	1743.64618706621	1862.77646393252	3088.03856977362	2260.92966836537	2269.00890862277
g4341	24.8411823291329	22.7290936861517	19.471530981873	7.17036819606878	9.91092457365642	10.7108495065423
g4342	158.362537348222	282.490164385029	360.223323164651	580.799823881571	431.125218954054	520.321794449396
g4343	0	0	0	0	0	0
g4344	6.21029558228322	42.2111739885675	35.6978068001005	14.3407363921376	17.3441180038987	20.2942411702906
g4345	254.622118873612	71.4342944421912	438.109447092142	105.762930892014	170.963448895573	111.054597515202
g4346	2291.59906986251	3337.92975848057	2430.69611757048	2041.76234383058	2067.66663917907	2453.34826591958
g4347	37.2617734936993	87.669361360871	22.7167861455185	35.8518409803439	48.3157572965751	36.6423798908026
g4348	801.128130114536	633.167609828512	1651.83487829556	43.0222091764127	70.615337587302	83.9956092881474
g4349	1807.19601444442	3113.88583500279	1671.30640927743	264.108561888533	542.003687621836	330.34514793862
g4350	71.4183991962571	90.9163747446069	94.1123997457195	89.6296024508597	96.6315145931501	104.853579379835
g4351	155.257389557081	191.573789640422	81.1313790911375	195.392533342874	212.46544554776	160.662742598134
g4352	80.7338425696819	133.127548733174	100.602910073011	240.207334568304	262.020068416042	200.123767095922
g4353	456.456725297817	318.207311606124	324.52551636455	1361.17489588706	1935.72745579227	1819.71695826939
g4354	102.469877107673	61.6932542909833	246.639392437058	28.6814727842751	99.1092457365642	100.343748008659
g4355	257.727266664754	288.984191152501	256.375157927995	601.115867103766	684.473228368147	834.318803667504
g4356	15.5257389557081	12.9880535349438	55.1693377819735	14.3407363921376	35.9271015795045	19.7305122488937
g4357	313.619926905303	211.055869942838	142.791227200402	252.157948228419	250.870278270678	205.197327388494
g4358	555.821454614349	727.330997956855	528.976591674216	560.483780659376	516.606943401841	535.542475327114
g4359	444.036134133251	314.960298222388	408.902150619333	304.740648332923	206.271117689224	216.471905816434
g10887	0	0	0	0	0	0
g10888	86.9441381519651	172.091709338006	58.414592945619	360.908532535462	374.756835441383	312.305822453917
g10889	0	0	0	0	0	0
g10890	3.10514779114161	0	0	0	1.85829835756058	5.63728921396962
g10891	0	0	0	0	0	0
g10892	307.40963132302	441.593820188091	373.204343819233	316.691261993038	259.542337272628	231.128857772755
g4360	378.828030519277	376.653552513372	314.789750873614	107.555522941032	74.9513670882767	96.3976455588806
g4361	49.6823646582658	120.139495198231	87.6218894184285	17.9259204901719	28.4939081492622	9.0196627423514
g4362	46400.2234430291	35493.1032976178	57960.2572227086	274.864114182636	321.48561585798	573.312313060711
g4363	11163.0063091541	12543.212701372	16531.3298036102	511.486264652906	365.465343653581	744.12217624399
g4364	27.9463301202745	0	0	8.36542956208024	9.29149178780289	11.2745784279392
g4365	0	22.7290936861517	6.490510327291	5.37777614705158	32.8299376502369	35.5149220480086
g4366	77.6286947785403	152.60962903559	68.1503584365555	249.767825496396	281.841917563354	248.040725414663
g4367	13258.9810681747	11763.9294892754	13756.6366386933	1209.99963308661	1054.89403430856	2094.25294298971
g4368	0	0	0	0	0	0
g4369	1043.32965782358	779.283212096631	869.728383856994	789.338032250571	887.02774934225	894.637798256979
g4370	14274.364395878	11182.7140935867	13273.0936193101	11251.5027609979	21746.4268129597	22316.9005402629
g4371	0	0	0	0	0	0
g4372	155.257389557081	107.151441663287	188.224799491439	209.733269735012	250.870278270678	268.334966584954
g4373	90.0492859431068	35.7171472210956	45.433572291037	164.320937826576	147.425003033139	156.152911226959
g4374	2468.59249395758	2958.02919258346	2768.20265458961	1292.4588673414	1038.78878187636	1062.06528791188
g4375	186.308867468497	113.645468430759	126.564951382174	62.7407217156018	55.1295179409638	67.6474705676355
g4376	1412.84224496943	2383.3078236622	1298.1020654582	11252.6978223639	7137.72399139018	5647.43633455477
g4377	357.091995981285	672.131770433344	444.599957419434	746.315823074158	712.967136517409	714.808272331348
g4378	409.879508430693	457.828887106771	480.297764219534	285.022135793734	489.351900824286	387.281768999713
g4379	3695.12587145852	3519.76250796978	4020.87114775677	1981.41174484701	2061.47231132054	1684.98574605552
g4380	8765.83221439277	7883.74849571091	8567.47363202412	799.496053861669	1017.10863437149	1439.76366524784
g4381	288.77874457617	204.561843175366	240.148882109767	402.138149662857	368.562507582848	359.659051851262
g10893	49.6823646582658	61.6932542909833	48.6788274546825	52.5827001045044	51.4129212258427	70.4661151746203
g10894	1009.17303212102	866.952573457502	847.011597711475	1505.17979049144	925.432582065168	1035.00629968482
g10895	0	0	12.981020654582	28.6814727842751	15.4858196463382	16.3481387205119
g10896	52.7875124494074	32.4701338373596	35.6978068001005	34.6567796143324	33.4493704360904	34.9511931266117
g10897	3397.03168350892	4484.12548293936	3543.81863870089	3187.82619383558	2912.57295908328	3587.57085577027
g10898	0	0	0	0.597530683005731	0	0
g10899	0	0	9.7357654909365	0	0	0
g4382	298.094187949595	188.326776256686	425.128426437561	176.271551486691	270.692127417991	177.010881318646
g4383	12.4205911645664	19.4820803024158	0	1.79259204901719	0	1.69118676419089
g4384	0	12.9880535349438	0	0	5.57489507268174	1.69118676419089
g4385	0	0	3.2452551636455	2.39012273202293	8.67205900194937	3.94610244977874
g4386	0	3.24701338373596	22.7167861455185	3.58518409803439	4.33602950097468	2.25491568558785
g4387	65.2081036139738	74.6813078259271	32.452551636455	174.478959437674	190.785298042886	160.662742598134
g4388	0	269.502110850085	61.6598481092645	591.555376175674	171.582881681427	108.235952908217
g4389	1061.96054457043	3672.37213700537	1547.9867130589	2936.26577629016	1357.17723380508	1109.41851730922
g4390	15.5257389557081	0	0	0	0	0
g4391	124.205911645664	71.4342944421912	155.772247854984	340.592489313267	262.639501201895	240.712249436503
g4392	3027.51909636307	1889.76178933433	3303.66975659112	148.785140068427	161.67195710777	148.824435248798
g4393	965.700963045041	1103.98455047023	1054.70792818479	1642.61184758276	1583.27020064161	1477.53350298144
g4394	558.92660240549	603.944489374889	454.33572291037	1126.3453374658	894.460942772492	864.76016542294
g4395	2499.643971869	1720.91709338006	2060.73702891489	1554.77483718091	1769.71946918352	1754.32440338735
g4396	127.311059436806	243.526003780197	162.262758182275	482.804791868631	484.396438537458	400.81126311324
g4397	93.1544337342484	16.2350669186798	94.1123997457195	21.5111045882063	29.7327737209693	46.7895004759479
g4398	27.9463301202745	19.4820803024158	19.471530981873	133.249342310278	82.384560518519	74.412217624399
g4399	816.653869070244	1360.49860778537	1311.08308611278	942.305887100038	726.594657806186	614.464524322689
g4400	108.680172689956	84.422347977135	175.243778836857	333.422121117198	396.436982946257	375.443461650377
g4401	192.51916305078	266.255097466349	220.677351127894	269.486338035585	297.327737209693	295.393954812008
g4402	0	0	0	0	0	0
g4403	0	0	0	0	0	0
g4404	0	0	0	0	0	0
g4405	62.1029558228322	48.7052007560394	3.2452551636455	260.523377790499	260.781202844335	225.491568558785
g4406	0	0	0	0	0	0
g4407	0	0	0	1.19506136601146	0	0
g4408	409.879508430693	590.956435839945	369.959088655587	828.177526645944	862.250437908109	797.676423776702
g4409	742.130322082845	672.131770433344	843.76634254783	780.375072005485	836.234260902261	860.814062973162
g705	37.2617734936993	55.1992275235113	68.1503584365555	38.8394943953725	13.6275212887776	21.9854279344815
g706	1257.58485541235	2000.16024438135	1525.26992691339	2448.08320827448	2040.41159660152	1937.53630284136
g707	357.091995981285	529.263181548962	269.356178582576	1938.9870663536	1565.30664985186	1159.59039131355
g708	1204.79734296295	1402.70978177394	1158.55609342144	1168.1724852762	1142.2340571139	956.647979610645
g709	937.754632924767	1120.21961738891	1843.30493295064	494.15787484574	304.760930639935	263.261406292381
g710	1726.46217187474	1526.0962903559	1710.24947124118	4535.2578840135	4676.71753319412	3910.02379880933
g711	0	3.24701338373596	9.7357654909365	4.78024546404585	3.71659671512116	0
g712	186.308867468497	253.267043931405	214.186840800603	487.585037332677	375.376268227237	360.222780772659
g713	245.306675500187	214.302883326573	197.960564982376	233.036966372235	157.335927606796	174.755965633058
g714	381.933178310418	425.358753269411	249.884647600704	707.476328678786	632.44087435645	616.719440008277
g715	3334.92872768609	2662.55097466349	3368.57485986403	5405.26255846985	4652.55965454584	4645.12631231097
g716	313.619926905303	214.302883326573	298.563475055386	323.861630189106	250.250845484825	219.854279344815
g717	409.879508430693	503.287074479074	295.318219891741	890.918248361545	774.290982316908	772.308622313838
g718	102.469877107673	51.9522141397754	107.093420400301	46.607393274447	26.0161770058481	39.4610244977874
g719	403.66921284841	211.055869942838	464.071488401307	364.493716633496	270.072694632137	304.41361755436
g720	117.995616063381	113.645468430759	139.545972036756	351.945572290376	391.481520659429	235.63868914393
g721	465.772168671242	590.956435839945	483.54301938318	599.323275054749	755.707998741302	837.137448274489
g722	21.7360345379913	61.6932542909833	55.1693377819735	31.071595516298	29.1133409351157	22.5491568558785
g723	3738.5979405345	4828.30890161538	3332.87705306393	7469.73106825465	6551.12114318689	5579.78886398713
g724	347453.617237582	233216.736286835	302525.931610197	47346.5387293251	37311.5338558872	38504.9402470981
g725	14889.183658524	6117.37321495855	15986.1269361177	1567.92051220704	1502.74393848065	1390.15552016491
g726	34.1566257025577	81.175334593399	6.490510327291	102.775277476986	140.61124238875	183.211899454013
g727	173.88827630393	204.561843175366	266.110923418931	311.313485845986	236.623324196047	299.903786183184
g728	0	0	0	0	0	0
g729	999.857588747599	1149.44273784253	1015.76486622104	593.945498907697	742.699910238378	757.08794143612
g730	1006.06788432988	1315.04042041306	960.595528439068	1265.56998660614	2404.63807468339	2212.63601648308
g731	9321.65366900712	7607.75235809336	9654.63411184536	593.945498907697	719.161464375944	1134.78631877209
g732	419.194951804118	438.346806804355	382.940109310169	277.851767597665	242.198219268729	214.216990130846
g733	3328.71843210381	2750.22033602436	3245.2551636455	2495.28813223193	1777.15266261377	2064.93903907707
g734	468.877316462383	454.581873723035	564.674398474317	584.982538662611	544.48141876525	612.209608637101
g735	0	3.24701338373596	0	65.7283751306305	45.2185933673074	62.0101813536659
g736	1394.21135822258	1107.23156385396	1298.1020654582	866.41949035831	1054.2746015227	1023.16799233549
g737	83.8389903608235	94.1633881283429	165.508013345921	213.915984516052	294.850006066279	275.099713641718
g738	1375.58047147573	899.422707294861	1006.02910073011	642.345484231161	402.011878018939	1112.23716191621
g739	0	12.9880535349438	9.7357654909365	16.1333284411547	21.0607147190199	16.3481387205119
g10900	149.047093974797	405.876672966995	298.563475055386	271.278930084602	309.09696014091	360.222780772659
g10901	18.6308867468497	9.74104015120789	6.490510327291	31.6691261993038	52.0323540116962	40.0247534191843
g10902	0	0	0	0	2.47773114341411	1.12745784279392
g10903	12.4205911645664	45.4581873723035	55.1693377819735	48.99751600647	48.3157572965751	40.0247534191843
g10904	6.21029558228322	19.4820803024158	9.7357654909365	9.5604909280917	4.95546228682821	1.12745784279392
g10905	0	0	0	0.597530683005731	0.619432785853526	0.563728921396962
g4410	512.349385538366	526.016168165226	597.126950110772	792.3256856656	704.914510301313	723.264206152303
g4411	2064.92328110917	1938.46699009037	2554.01581378901	1967.07100845487	1718.92598074354	1868.76137443093
g4412	624.134706019464	1065.0203898654	649.0510327291	1986.78952099406	1969.79625901421	2075.64988858362
g4413	471.982464253525	577.968382305001	522.486081346926	596.33562163972	605.185831778895	548.508240519244
g4414	46.5772168671242	64.9402676747192	9.7357654909365	64.533313764619	57.6072490843779	55.8091632182993
g4415	108.680172689956	38.9641606048315	74.6408687638465	130.261688895249	131.319750600948	135.858670056668
g4416	509.244237747224	405.876672966995	305.053985382677	533.594899924118	527.137300761351	533.851288562923
g4417	192.51916305078	282.490164385029	210.941585636958	204.35549358796	253.348009414092	233.383773458342
g4418	537.190567867499	366.912512362164	593.881694947127	452.330727035339	445.372173028685	539.488577776893
g4419	267.042710038179	422.111739885675	318.035006037259	509.693672603889	560.586671197441	572.748584139314
g4420	37215.1962768322	23800.6081027846	34338.044886533	13490.4502302204	13983.0757078575	13155.1781097195
g4421	93.1544337342484	133.127548733174	146.036482364048	406.918395126903	414.400533736009	357.967865087071
g4422	2788.42271644517	4734.14551348703	2787.67418557148	4176.14194352706	4386.20355662882	3952.8671968355
g4423	372.617734936993	318.207311606124	525.731336510571	576.617109100531	653.50158907547	593.606554231001
g4424	139.731650601373	155.856642419326	159.017503018629	275.461644865642	262.639501201895	247.476996493266
g4425	43.4720690759826	51.9522141397754	35.6978068001005	90.8246638168712	74.3319343024232	90.7603563449109
g4426	9560.75004892502	7257.07491264987	11858.1623679607	2299.89559888906	3084.15584076471	3265.6816416526
g4427	1599.15111243793	4078.24880997237	2005.56769113292	3652.70506521404	1925.81653121861	3156.88195982299
g4428	642.765592766314	873.446600224974	775.615984111275	1655.75752260888	812.076382253973	1465.6951956321
g4429	658.291331722022	730.578011340591	603.617460438063	1209.99963308661	1002.24224751101	1128.58530063672
g4430	21.7360345379913	58.4462409072473	61.6598481092645	120.103667284152	110.878468667781	75.539675467193
g4431	27.9463301202745	9.74104015120789	16.2262758182275	77.6789887907451	95.392649021443	110.490868593805
g4432	121.100763854523	165.597682570534	110.338675563947	318.483854042055	209.368281618492	178.702068082837
g4433	3.10514779114161	6.49402676747192	19.471530981873	20.9135739052006	0.619432785853526	1.12745784279392
g10906	717.289139753712	818.247372701462	769.125473783983	843.713324404093	1005.95884422613	979.197136466524
g10907	0	6.49402676747192	0	0	1.23886557170705	0
g10908	46.5772168671242	25.9761070698877	3.2452551636455	62.7407217156018	35.307668793651	53.5542475327114
g10909	0	0	0	0	0	0
g10910	0	0	0	0	0	0
g4434	49.6823646582658	123.386508581967	116.829185891238	194.795002659868	174.680045610694	162.917658283722
g4435	83.8389903608235	81.175334593399	139.545972036756	126.078974114209	134.416914530215	125.147820550126
g4436	71.4183991962571	113.645468430759	139.545972036756	139.822179823341	117.072796526316	147.696977406004
g4437	0	0	0	0	0	0
g4438	506.139089956083	308.466271454916	356.978068001005	407.515925809909	309.09696014091	316.251924903696
g4439	673.81707067773	704.601904270704	548.448122656089	683.575101358557	392.100953445282	363.605154301041
g4440	0	9.74104015120789	6.490510327291	14.9382670751433	6.81376064438879	11.2745784279392
g4441	80.7338425696819	100.657414895815	120.074441054884	342.385081362284	213.084878333613	188.285459746585
g4442	0	0	0	0	1.23886557170705	0
g4443	916.018598386776	168.84469595427	1346.78089291288	178.064143535708	310.95525849847	528.777728270351
g4444	807.338425696819	1386.47471485526	782.106494438566	2759.99422480347	2236.77178971708	2067.19395476266
g4445	0	9.74104015120789	19.471530981873	73.496274009705	36.546534365358	53.5542475327114
g4446	31.0514779114161	74.6813078259271	42.1883171273915	117.713544552129	90.4371867346148	95.8339166374836
g4447	37.2617734936993	42.2111739885675	51.924082618328	0	0	5.07356029257266
g4448	0	0	0	12.5481443431204	4.95546228682821	6.76474705676355
g4449	108.680172689956	16.2350669186798	259.62041309164	19.7185125391891	120.169960455584	140.368501427844
g4450	176.993424095072	71.4342944421912	178.489034000502	142.212302555364	102.206409665832	105.417308301232
g4451	0	0	0	1.19506136601146	0	0
g4452	3698.23101924966	97.4104015120788	8483.09699776934	342.98261204529	25.3967442199946	14304.6213804479
g4453	52.7875124494074	35.7171472210956	51.924082618328	123.688851382186	81.1456949468119	51.2993318471236
g4454	661.396479513163	360.418485594692	827.540066729602	884.942941531488	1196.74414226901	953.265606082263
g4455	3.10514779114161	19.4820803024158	9.7357654909365	1.19506136601146	1.23886557170705	2.81864460698481
g4456	96.25958152539	22.7290936861517	259.62041309164	71.106151277682	120.169960455584	106.544766144026
g4457	15739.9941532968	13591.9980243187	23745.5320323941	1263.77739455712	944.634998426628	1213.14463884626
g10911	0	0	0	0	0	0.563728921396962
g10912	121.100763854523	81.175334593399	55.1693377819735	56.1678842025387	85.4817244477866	100.343748008659
g10913	9.31544337342484	0	0	23.9012273202293	32.8299376502369	18.6030544060998
g4458	15.5257389557081	0	0	4.18271478104012	0	0
g4459	15.5257389557081	9.74104015120789	0	12.5481443431204	16.1052524321917	20.2942411702906
g4460	0	0	0	0	0	0
g4461	987.436997583033	1279.32327319197	963.840783602713	714.049166191849	769.954952815933	651.106904213491
g4462	204.939754215346	129.880535349438	314.789750873614	374.054207561588	833.137096972993	976.378491859539
g4463	211.15004979763	198.067816407894	139.545972036756	308.325832430957	309.09696014091	396.301431742065
g4464	40.366921284841	71.4342944421912	32.452551636455	97.9950320129399	73.0930687307161	50.7356029257266
g4465	108.680172689956	301.972244687444	139.545972036756	290.399911940785	286.177947064329	250.295641100251
g4466	18.6308867468497	0	16.2262758182275	11.9506136601146	1.85829835756058	1.69118676419089
g4467	596.18837589919	668.884757049608	470.561998728598	1033.13055091691	940.298968925653	925.079160012415
g4468	322.935370278728	526.016168165226	298.563475055386	1364.76007998509	1364.61042723532	1235.13006678074
g4469	0	0	0	0	0	1.69118676419089
g4470	493.718498791516	639.661636595984	327.770771528195	553.910943146313	289.275110993597	234.511231301136
g4471	4583.19813972502	3461.31626706254	6727.41395423712	1050.45894072408	2578.69868750823	1484.8619789596
g4472	167.677980721647	275.996137617557	201.205820146021	281.436951695699	279.36418641994	329.217690095826
g4473	0	0	16.2262758182275	0	0	0
g4474	689.342809633438	668.884757049608	584.14592945619	885.540472214494	617.574487495966	634.195036571583
g4475	409.879508430693	636.414623212248	525.731336510571	555.106004512324	497.404527040382	503.409926807487
g4476	925.3340417602	1185.15988506363	898.935680329804	849.091100551144	817.031844540801	852.921858073604
g10914	34.1566257025577	29.2231204536237	22.7167861455185	50.1925773724814	53.8906523692568	46.7895004759479
g10915	3.10514779114161	6.49402676747192	0	6.57283751306305	6.81376064438879	0.563728921396962
g10916	46.5772168671242	32.4701338373596	32.452551636455	65.1308444476247	73.0930687307161	69.3386573318264
g10917	0	0	0	0	0	0
g4477	0	0	0	13.1456750261261	17.9635507897523	12.4020362707332
g4478	139.731650601373	250.020030547669	220.677351127894	352.543102973382	410.683937020888	324.70785872465
g4479	27.9463301202745	45.4581873723035	16.2262758182275	175.674020803685	163.530255465331	143.187146034828
g4480	760.761208829695	1188.40689844736	554.938632983381	353.738164339393	377.234566584798	321.889214117666
g4481	726.604583127137	340.936405292276	937.87874229355	244.98758003235	250.250845484825	273.972255798924
g4482	149.047093974797	253.267043931405	318.035006037259	1060.01943165217	933.485208281264	828.117785532138
g4483	0	0	0	0	0	0
g4484	1108.53776143756	1399.4627683902	1025.50063171198	1183.70828303435	935.343506638825	1199.05141581134
g4485	3974.58917266126	2737.23228248942	3319.89603240935	191.209818561834	175.299478396548	256.496659235618
g4486	3844.17296543332	3445.08120014386	2859.06979917169	286.217197159745	203.79338654581	314.560738139505
g4487	58.9978080316906	64.9402676747192	74.6408687638465	207.940677685995	162.291389893624	198.432580331731
g4488	428.510395177542	324.701338373596	467.316743564952	502.52330440782	676.420602152051	684.366910575912
g4489	10147.6229814508	11893.8100246248	8953.65899649793	2569.38193692464	2363.75551081706	2586.95202029066
g4490	0	0	0	0.597530683005731	4.33602950097468	1.69118676419089
g4491	313.619926905303	405.876672966995	356.978068001005	182.844388999754	184.590970184351	183.211899454013
g4492	937.754632924767	1526.0962903559	1249.42323800352	1838.00438092563	1371.42418787971	1218.78192806023
g4493	27.9463301202745	9.74104015120789	3.2452551636455	2.39012273202293	2.47773114341411	6.20101813536659
g4494	475.087612044667	639.661636595984	629.579501747227	415.283824688983	375.99570101309	365.860069986629
g4495	4042.90242406638	3847.71085972711	4978.2214210322	687.160285456591	538.906523692568	623.48418706504
g4496	5353.27479192814	5308.8668824083	6597.6037476913	1257.80208772706	1609.28637764746	1620.15692009487
g4497	4837.82025859863	6558.96703514664	4884.10902128648	2993.62872185871	2691.43545453357	2948.30225890611
g4498	27.9463301202745	97.4104015120788	51.924082618328	169.101183290622	114.595065382902	114.436971043583
g4499	108.680172689956	16.2350669186798	210.941585636958	7.76789887907451	6.81376064438879	47.9169583187418
g4500	766.971504411978	529.263181548962	726.937156656592	243.194987983333	286.177947064329	254.24174355003
g4501	139.731650601373	272.749124233821	217.432095964249	448.745542937304	505.457153256477	452.674323881761
g4502	1484.26064416569	1795.59840120599	1470.10058913141	1542.22669283779	1580.17303671235	1536.16131080672
g10918	0	0	0	0.597530683005731	0	3.38237352838177
g10919	0	0	0	5.97530683005731	1.23886557170705	5.07356029257266
g10920	0	6.49402676747192	3.2452551636455	48.99751600647	22.9190130765805	46.7895004759479
g4503	0	0	0	5.97530683005731	0.619432785853526	3.38237352838177
g4504	487.508203209233	243.526003780197	415.392660946624	106.36046157502	213.704311119467	221.545466109006
g4505	2375.43806022333	1896.2558161018	1444.13854782225	351.34804160737	323.963347001394	489.88043269396
g4506	27.9463301202745	136.37456211691	87.6218894184285	26.8888807352579	11.1497901453635	21.9854279344815
g4507	11395.8923934897	13296.5198063988	13409.3943361832	1077.94535214234	760.044028242277	1858.05052492439
g4508	0	0	0	0	0.619432785853526	0
g4509	0	0	0	0	0	0
g4510	24.8411823291329	38.9641606048315	45.433572291037	19.1209818561834	15.4858196463382	27.6227171484512
g4511	229.780936544479	178.585736105478	126.564951382174	282.632013061711	260.161770058481	312.305822453917
g4512	86.9441381519651	87.669361360871	58.414592945619	25.6938193692464	20.4412819331664	34.9511931266117
g4513	62.1029558228322	110.398455047023	113.583930727593	166.113529875593	133.797481744362	136.422398978065
g4514	428.510395177542	431.852780036883	574.410163965254	126.676504797215	108.400737524367	146.005790641813
g4515	562.031750196632	756.554118410479	515.995571019635	77.0814581077393	135.036347316069	192.795291117761
g4516	80.7338425696819	113.645468430759	87.6218894184285	130.261688895249	109.639603096074	154.461724462768
g4517	102.469877107673	139.621575500646	12.981020654582	529.412185143078	532.712195834033	532.723830720129
g4518	658.291331722022	714.342944421912	597.126950110772	1024.16759067182	1085.24624081538	1131.4039452437
g4519	74.5235469873987	110.398455047023	25.962041309164	170.893775339639	192.643596400447	157.844097991149
g4520	850.810494772802	454.581873723035	545.202867492444	424.246784934069	735.266716808136	687.185555182897
g4521	639.660444975172	662.390730282136	632.824756910873	750.498537855199	709.869972588141	770.617435549648
g4522	86.9441381519651	19.4820803024158	155.772247854984	2.98765341502866	8.67205900194937	10.7108495065423
g4523	1229.63852529208	1509.86122343722	1619.3823266591	1457.37733585098	1539.29047284601	1159.59039131355
g4524	624.134706019464	733.825024724327	525.731336510571	816.824443668835	803.404323252024	811.769646811626
g4525	27.9463301202745	87.669361360871	45.433572291037	33.461718248321	25.3967442199946	40.5884823405813
g10921	0	16.2350669186798	9.7357654909365	21.5111045882063	25.3967442199946	14.656951956321
g10922	0	0	0	0	0	0
g10923	0	0	0	0	0	0
g10924	0	0	0	0	0	0
g4526	5418.48289554211	3974.34438169282	7762.65035144004	420.064070153029	489.971333610139	490.444161615357
g4527	15.5257389557081	87.669361360871	29.2072964728095	75.8863967417279	88.5788883770543	85.1230671309413
g4528	742.130322082845	698.107877503232	619.843736256291	377.041860976616	430.505786168201	380.51702194295
g4529	0	0	0	0	0	0
g4530	552.716306823207	87.669361360871	834.030577056894	12.5481443431204	35.9271015795045	59.191536746681
g4531	31.0514779114161	45.4581873723035	42.1883171273915	129.664158212244	102.206409665832	90.7603563449109
g4532	614.819262646039	675.37878381708	765.880218620338	432.612214496149	415.639399307716	388.409226842507
g4533	779.392095576545	1302.05236687812	778.86123927492	1738.81428754668	1621.67503336453	1568.29385932635
g4534	645.870740557455	207.808856559102	402.411640292042	291.594973306797	269.453261846284	273.408526877527
g4535	1766.82909315958	1581.29551787941	2005.56769113292	1265.56998660614	1264.26231592705	1177.06598787686
g4536	49.6823646582658	126.633521965702	81.1313790911375	440.97764405823	374.13740265553	381.644479785743
g4537	1223.4282297098	1522.84927697217	1375.98818938569	923.184905243855	1008.43657536954	963.976455588806
g4538	108.680172689956	201.31482979163	171.998523673212	75.8863967417279	131.939183386801	101.471205851453
g4539	0	3.24701338373596	6.490510327291	102.17774679398	125.125422742412	131.912567606889
g4540	0	0	3.2452551636455	6.57283751306305	2.47773114341411	3.94610244977874
g4541	242.201527709046	126.633521965702	207.696330473312	227.659190225184	222.376370121416	189.976646510776
g4542	186.308867468497	191.573789640422	126.564951382174	325.654222238124	386.5260583726	270.589882270542
g4543	363.302291563569	259.761070698877	259.62041309164	239.609803885298	306.619228997495	245.222080807679
g4544	642.765592766314	522.76915478149	1612.89181633181	544.350452218221	521.562405688669	538.361119934099
g4545	6387.2890063783	3646.39602993548	8343.55102573258	1413.16006530855	1133.56199811195	1105.47241485944
g4546	6.21029558228322	42.2111739885675	19.471530981873	25.6938193692464	26.6356097917016	34.9511931266117
g4547	260.832414455895	178.585736105478	142.791227200402	628.602278522029	545.100851551103	466.203817995288
g4548	198.729458633063	136.37456211691	100.602910073011	173.283898071662	162.910822679477	127.96646515711
g10925	0	6.49402676747192	3.2452551636455	0	4.95546228682821	4.5098313711757
g10926	0	0	0	4.18271478104012	6.19432785853526	1.69118676419089
g10927	0	9.74104015120789	0	73.496274009705	47.076891724868	43.9708558689631
g4549	2095.97475902059	1789.10437443851	3034.31357800854	4240.67525729168	6053.09718336066	5007.60400876922
g4550	971.911258627325	1341.01652748295	1849.79544327793	304.740648332923	280.603051991647	301.594972947375
g4551	3390.82138792664	1029.3032426443	3654.15731426483	44.2172705424241	156.716494820942	222.6729239518
g4552	189.414015259638	198.067816407894	178.489034000502	390.187536002743	465.194022175998	414.904486148164
g4553	195.624310841922	314.960298222388	126.564951382174	476.231954355568	561.825536769148	473.532293973448
g4554	40.366921284841	51.9522141397754	22.7167861455185	54.9728228365273	56.3683835126709	74.412217624399
g4555	6.21029558228322	35.7171472210956	29.2072964728095	87.2394797188368	180.254940683376	261.006490606794
g4556	329.145665861011	344.183418676012	311.544495709968	734.96274009705	874.639093625179	832.063887981916
g4557	251.516971082471	214.302883326573	256.375157927995	191.80734924484	208.748848832638	171.373592104677
g4558	0	100.657414895815	29.2072964728095	81.2641728887795	104.684140809246	90.196627423514
g4559	1847.56293572926	1354.0045810179	1989.34141531469	1671.89085105004	2287.56527815707	2075.64988858362
g4560	80.7338425696819	129.880535349438	48.6788274546825	216.90363793108	181.493806255083	179.829525925631
g4561	313.619926905303	217.549896710309	259.62041309164	98.5925626959457	254.586874985799	226.055297480182
g4562	232.886084335621	227.290936861517	220.677351127894	222.281414078132	418.736563236984	625.739102750628
g4563	0	0	0	0	1.85829835756058	0
g4564	105.575024898815	84.422347977135	207.696330473312	144.602425287387	187.688134113618	122.892904864538
g4565	71.4183991962571	32.4701338373596	71.395613600201	152.370324166462	119.550527669731	116.691886729171
g4566	2704.58372608434	2026.13635145124	3465.93251477339	589.762784126657	592.177743275971	728.901495366272
g4567	58.9978080316906	64.9402676747192	22.7167861455185	1.19506136601146	5.57489507268174	9.0196627423514
g4568	21981.3412134915	32333.7592752427	24793.7494502516	22552.0030380023	14046.2578520146	15075.2388159976
g4569	3.10514779114161	19.4820803024158	12.981020654582	0	3.71659671512116	0
g4570	2012318.97237944	2024743.38270962	2067873.34501975	11621.9717844615	22357.1875398113	144095.87705612
g10928	133.521355019089	133.127548733174	214.186840800603	218.696229980098	214.943176691174	208.579700916876
g10929	0	0	0	0	0	0
g4571	2990.25732286937	4773.10967409186	3504.87557673714	9645.93781576152	4186.12676679813	5810.35399283849
g4572	1248.26941203893	1532.59031712337	1265.64951382175	1498.60695297837	958.262519715405	1143.24225259304
g4573	506.139089956083	561.733315386321	366.713833491942	1171.16013869123	1155.86157840268	1049.09952271975
g4574	52.7875124494074	136.37456211691	139.545972036756	280.839421012694	219.898638978002	157.280369069752
g4575	34.1566257025577	16.2350669186798	9.7357654909365	13.1456750261261	17.9635507897523	28.1864460698481
g4576	732.81487870942	931.892841132221	756.144453129402	1586.44396338022	1839.71537398497	1683.85828821273
g4577	83.8389903608235	51.9522141397754	94.1123997457195	117.116013869123	124.505989956559	121.201718100347
g4578	263.937562247037	509.781101246546	285.582454400804	510.291203286895	598.99150392036	489.316703772563
g4579	226.675788753338	230.537950245253	116.829185891238	539.570206754175	517.226376187694	422.232962126325
g4580	65.2081036139738	12.9880535349438	16.2262758182275	41.8271478104012	49.5546228682821	40.5884823405813
g4581	2816.36904656544	2100.81765927717	2248.96182840633	1336.07860720082	1297.71168636314	1100.39885456687
g4582	192.51916305078	142.868588884382	146.036482364048	229.451782274201	247.153681555557	281.864460698481
g4583	3.10514779114161	58.4462409072473	19.471530981873	68.7160285456591	71.2347703731555	76.1034043885899
g4584	90.0492859431068	81.175334593399	184.979544327793	123.091320699181	260.781202844335	230.565128851358
g4585	86.9441381519651	35.7171472210956	100.602910073011	101.580216110974	186.449268541911	186.594272982395
g4586	12069.7094641674	13351.7190339223	12163.2163533433	8799.2368379424	10402.7542056241	10688.8640786078
g4587	493.718498791516	626.673583061041	441.354702255788	1551.18965308288	1223.99918484657	1110.54597515202
g4588	934.649485133625	1753.38722721742	931.388231966259	2094.34504393509	1862.63438706155	1591.97047402502
g4589	860.125938146227	642.90864997972	1427.91227200402	369.871492780548	423.072592737958	488.189245929769
g4590	86.9441381519651	165.597682570534	113.583930727593	532.399838558107	473.246648392094	345.565828816338
g10930	0	0	0	0	0	0
g4591	229.780936544479	139.621575500646	301.808730219032	175.076490120679	182.73267182679	175.883423475852
g4592	1499.7863831214	2139.781819882	1804.3618709869	1554.17730649791	1720.16484631524	1889.61934452262
g4593	1530.83786103281	1967.69011054399	1139.08456243957	1658.1476453409	1435.84519760847	1539.5436843351
g4594	0	0	0	0	0	0
g4595	2549.32633652726	3159.34402237509	2667.5997445166	873.589858554379	846.145185475917	925.079160012415
g4596	2651.79621363494	2461.23614487186	2946.69168859011	497.743058943774	421.214294380398	556.964174340199
g4597	4111.21567547149	3665.8781102379	4961.99514521397	904.661454070677	921.715985350047	1143.80598151444
g4598	0	0	0	0	0	0
g4599	0	0	0	0	0	0
g4600	0	12.9880535349438	12.981020654582	35.2543102973382	42.1214294380398	43.9708558689631
g4601	0	3.24701338373596	0	40.6320864443897	27.2550425775552	23.1128857772755
g4602	0	0	0	0	0	0
g4603	0	0	0	0	0	0
g4604	0	22.7290936861517	32.452551636455	57.3629455685502	80.5262621609584	55.8091632182993
g4605	102.469877107673	142.868588884382	197.960564982376	225.866598176166	266.356097917016	208.579700916876
g4606	2241.91670520424	2256.67430169649	1986.09616015105	1308.59219578255	1486.01925326261	1541.79860002069
g4607	99.3647293165316	172.091709338006	87.6218894184285	204.35549358796	162.910822679477	153.897995541371
g4608	15.5257389557081	74.6813078259271	71.395613600201	100.385154744963	97.2509473790036	87.3779828165292
g4609	2381.64835580562	4295.79870668268	2076.96330473312	3128.67065621801	1513.89372862602	2634.30524968801
g4610	93.1544337342484	74.6813078259271	77.886123927492	139.224649140335	121.408826027291	177.574610240043
g4611	99.3647293165316	58.4462409072473	45.433572291037	232.439435689229	204.412819331664	255.932930314221
g10931	257.727266664754	123.386508581967	165.508013345921	250.962886862407	235.38445862434	270.026153349145
g4612	745.235469873987	678.625797200816	587.391184619835	900.478739289637	802.165457680317	789.220489955747
g4613	6436.97137103656	7572.03521087226	7184.99493231114	2177.40180887288	1816.17692812254	1873.8349347235
g4614	180.098571886214	61.6932542909833	81.1313790911375	147.590078702416	125.744855528266	133.60375437108
g4615	71.4183991962571	58.4462409072473	129.81020654582	70.5086205946763	57.6072490843779	59.191536746681
g4616	255280.410205334	223543.883416686	333573.287760794	734.365209414044	661.554215291566	1880.59968178027
g4617	329.145665861011	532.510194932698	308.299240546322	0	0	17.4755965633058
g4618	5123.49385538366	7107.71229699802	4637.46962884942	7174.55091084982	8027.22947187585	7760.29233195058
g4619	701.763400798004	714.342944421912	519.24082618328	373.456676878582	264.497799559456	433.507540554264
g4620	214.255197588771	230.537950245253	133.055461709466	219.293760663103	180.87437346923	219.290550423418
g4621	124.205911645664	155.856642419326	81.1313790911375	288.009789208763	239.720488125315	233.383773458342
g4622	176.993424095072	116.892481814495	146.036482364048	57.9604762515559	45.2185933673074	40.0247534191843
g4623	186.308867468497	194.820803024158	103.848165236656	311.911016528992	286.797379850183	255.932930314221
g4624	0	3.24701338373596	0	34.0592489313267	11.1497901453635	11.8383073493362
g4625	0	25.9761070698877	35.6978068001005	63.3382523986075	45.8380261531609	46.7895004759479
g4626	0	0	0	2.39012273202293	10.5303573595099	9.0196627423514
g4627	0	3.24701338373596	0	5.37777614705158	7.43319343024232	5.63728921396962
g4628	9.31544337342484	22.7290936861517	0	60.3505989835789	48.3157572965751	49.6081450829327
g4629	96.25958152539	68.1872810584552	68.1503584365555	250.365356179401	243.437084840436	196.177664646143
g4630	204.939754215346	295.478217919973	116.829185891238	439.782582692218	480.679841822336	377.698377335965
g4631	431.615542968684	737.072038108063	438.109447092142	890.32071767854	924.193716493461	889.564237964407
g4632	6.21029558228322	0	19.471530981873	71.7036819606878	61.9432785853526	85.1230671309413
g4633	12.4205911645664	126.633521965702	55.1693377819735	311.313485845986	370.420805940409	338.237352838177
g4634	1816.51145781784	1772.86930751984	1535.00569240432	1058.22683960315	1040.64708023392	965.667642352996
g4635	270.14785782932	422.111739885675	230.413116618831	348.360388192341	260.161770058481	258.751574921206
g740	1800.98571886213	347.430432059748	1758.92829869586	3724.40874717472	3057.52023097301	1811.26102444844
g741	0	0	0	0	0	0
g742	0	0	0	0	0	0
g743	0	0	9.7357654909365	0	0	0
g744	102.469877107673	149.362615651854	220.677351127894	170.296244656633	162.291389893624	171.937321026074
g745	326.040518069869	389.641606048315	152.526992691339	665.649180868385	505.457153256477	548.508240519244
g746	332.250813652152	288.984191152501	165.508013345921	348.360388192341	288.655678207743	251.986827864442
g747	189.414015259638	298.725231303708	165.508013345921	516.266510116952	394.578684588696	388.972955763904
g748	943.96492850705	1032.55025602804	947.614507784486	1397.0267368674	1073.47701788416	1168.6100540559
g749	24.8411823291329	74.6813078259271	12.981020654582	81.8617035717852	81.1456949468119	91.3240852663079
g750	6.21029558228322	9.74104015120789	16.2262758182275	18.5234511731777	10.5303573595099	24.8040725414663
g751	940.859780715908	1081.25545678408	937.87874229355	543.15539085221	489.351900824286	583.459433645856
g752	810.443573487961	1227.37105905219	863.237873529703	1035.52067364893	758.185729884716	944.809672261309
g753	322.935370278728	314.960298222388	308.299240546322	304.740648332923	273.169858561405	298.212599418993
g754	65.2081036139738	55.1992275235113	61.6598481092645	52.5827001045044	53.8906523692568	78.9220489955747
g755	167.677980721647	123.386508581967	171.998523673212	95.0073785979113	69.3764720155949	120.074260257553
g756	74.5235469873987	772.789185329159	376.449598982878	1053.4465941391	423.692025523812	878.853388457864
g757	978.121554209608	574.721368921265	772.370728947629	129.066627529238	244.056517626289	233.947502379739
g758	0	0	6.490510327291	0.597530683005731	0	0
g759	0	0	0	0	1.23886557170705	0.563728921396962
g760	0	0	0	0	0	0
g761	4039.79727627524	4357.49196097366	3018.08730219031	81.8617035717852	84.8622916619331	113.873242122186
g762	80.7338425696819	84.422347977135	74.6408687638465	50.7901080554872	53.8906523692568	58.0640789038871
g763	291.883892367312	373.406539129636	389.43061963746	58.5580069345617	89.8177539487613	69.9023862532233
g764	12.4205911645664	12.9880535349438	58.414592945619	7.76789887907451	14.8663868604846	16.3481387205119
g765	0	0	0	0	0	0
g766	329.145665861011	340.936405292276	201.205820146021	124.286382065192	137.514078459483	151.079350934386
g767	0	0	0	0	0	0
g768	0	0	0	0	0	0
g769	0	0	0	0	0	0
g770	52.7875124494074	9.74104015120789	29.2072964728095	14.3407363921376	16.7246852180452	11.8383073493362
g771	52.7875124494074	12.9880535349438	12.981020654582	130.261688895249	100.348111308271	111.618326436599
g772	0	0	0	2.39012273202293	0	0
g773	689.342809633438	795.518279015311	522.486081346926	1078.54288282535	920.47711977834	1048.53579379835
g774	1459.41946183656	1324.78146056427	976.821804257296	735.560270780055	728.452956163747	898.583900706758
g775	810.443573487961	876.69361360871	795.087515093148	154.162916215479	152.380465319967	278.482087170099
g776	16789.5341067027	19673.6540920562	12069.1039535976	938.123172318998	1126.74823746756	2827.10054080577
g777	149.047093974797	188.326776256686	81.1313790911375	151.17526280045	148.663868604846	146.005790641813
g778	1620.88714697592	1490.37914313481	1716.73998156847	141.614771872358	112.736767025342	246.91326757187
g779	142.836798392514	185.07976287295	116.829185891238	154.760446898484	151.761032534114	151.643079855783
g780	1120.95835260212	876.69361360871	1181.27287956696	926.770089341889	945.254431212481	944.809672261309
g781	254.622118873612	227.290936861517	431.618936764852	281.436951695699	268.214396274577	262.133948449587
g782	68.3132514051155	123.386508581967	146.036482364048	176.271551486691	143.088973532165	107.67222398682
g783	1021.59362328559	1103.98455047023	882.709404511576	1391.05143003734	1381.33511245336	1394.10162261469
g784	127.311059436806	136.37456211691	133.055461709466	303.545586966912	345.024061720414	330.34514793862
g785	155.257389557081	146.115602268118	84.376634254783	195.392533342874	219.279206192148	183.77562837541
g786	3.10514779114161	16.2350669186798	6.490510327291	35.8518409803439	48.9351900824286	28.7501749912451
g10932	0	9.74104015120789	9.7357654909365	8.96296024508597	11.769222931217	9.0196627423514
g10933	0	0	0	1.19506136601146	7.43319343024232	10.7108495065423
g4636	0	3.24701338373596	16.2262758182275	8.36542956208024	8.05262621609584	11.2745784279392
g4637	291.883892367312	386.394592664579	194.71530981873	397.955434881817	392.720386231136	382.20820870714
g4638	93.1544337342484	64.9402676747192	71.395613600201	154.760446898484	217.420907834588	189.412917589379
g4639	2241.91670520424	2662.55097466349	2330.09320749747	1791.99451833419	1845.29026905765	1984.32580331731
g4640	24.8411823291329	19.4820803024158	6.490510327291	8.36542956208024	17.3441180038987	7.89220489955747
g4641	900.492859431067	1237.1120992034	743.16343247482	4252.62587095179	2635.0670710209	2440.38250072745
g4642	453.351577506675	389.641606048315	288.827709564449	765.436804930342	637.396336643279	495.51772190793
g4643	1065.06569236157	1139.70169769132	941.123997457195	260.523377790499	316.530153571152	297.648870497596
g4644	341.566257025577	487.052007560394	405.656895455688	804.87383000872	759.424595456423	618.974355693865
g4645	503.033942164941	808.506332550254	509.505060692344	1019.98487589078	875.258526411033	970.741202645569
g4646	27.9463301202745	90.9163747446069	38.943061963746	100.385154744963	126.364288314119	90.7603563449109
g4647	83.8389903608235	139.621575500646	77.886123927492	197.185125391891	219.279206192148	161.226471519531
g4648	117.995616063381	451.334860339299	227.167861455185	474.439362306551	424.311458309666	444.782118982203
g4649	55.892660240549	87.669361360871	35.6978068001005	337.604835898238	320.246750286273	328.090232253032
g4650	39289.4350013148	4958.18943696481	45907.3795449292	2554.4436698495	9738.10282640329	10074.9632832065
g4651	857.020790355085	1613.76565171677	1145.57507276686	1252.42431158001	690.667556226682	951.574419318072
g4652	0	0	0	0	4.95546228682821	5.07356029257266
g4653	18.6308867468497	19.4820803024158	90.867144582074	103.372808159992	105.303573595099	67.6474705676355
g4654	161.467685139364	110.398455047023	74.6408687638465	180.454266267731	195.740760329714	193.359020039158
g4655	357.091995981285	327.948351757332	522.486081346926	257.53572437547	232.906727480926	235.074960222533
g4656	263.937562247037	240.278990396461	155.772247854984	213.915984516052	190.165865257033	217.599363659227
g4657	15.5257389557081	22.7290936861517	12.981020654582	89.6296024508597	79.2873965892514	84.5593382095444
g4658	801.128130114536	944.880894667165	671.767818874619	818.019505034846	699.959048014485	716.499459095539
g4659	83.8389903608235	123.386508581967	97.357654909365	181.649327633742	202.554520974103	144.878332799019
g4660	139.731650601373	181.832749489214	90.867144582074	397.955434881817	431.125218954054	440.272287611028
g4661	208.044902006488	113.645468430759	155.772247854984	285.61966647674	607.044130136456	563.165192475565
g4662	71.4183991962571	94.1633881283429	58.414592945619	70.5086205946763	84.8622916619331	69.9023862532233
g4663	568.242045778915	737.072038108063	337.506537019132	426.636907666092	466.432887747705	418.286859676546
g10934	1412.84224496943	1704.68202646138	2177.56621480613	334.61718248321	398.295281303817	313.433280296711
g10935	15.5257389557081	25.9761070698877	71.395613600201	4.78024546404585	7.43319343024232	9.0196627423514
g4664	0	3.24701338373596	0	0	0	0
g4665	0	0	12.981020654582	7.17036819606878	0	2.81864460698481
g4666	0	0	0	0	0	0
g4667	0	6.49402676747192	0	7.17036819606878	6.81376064438879	2.25491568558785
g4668	0	16.2350669186798	0	14.3407363921376	11.769222931217	12.9657651921301
g4669	21.7360345379913	71.4342944421912	45.433572291037	183.44191968276	218.040340620441	131.348838685492
g4670	1080.59143131728	1220.87703228472	1090.40573498489	1514.14275073652	1522.56578762797	1619.59319117347
g4671	2052.50268994461	2412.53094411582	2073.71804956947	1746.58218642575	1886.79226570984	1765.59898181529
g4672	1347.63414135546	1363.7456211691	1625.8728369864	409.308517858926	407.58677309162	382.20820870714
g4673	701.763400798004	672.131770433344	778.86123927492	677.599794528499	843.048021546649	687.185555182897
g4674	1822.72175340013	1905.99685625301	1687.53268509566	2287.94498522895	2048.46422281761	2371.04384339562
g4675	776.286947785403	717.589957805647	590.636439783481	595.738090956714	536.428792549154	541.179764541084
g4676	294.989040158453	1042.29129617924	658.786798220037	616.651664861915	585.983415417436	495.51772190793
g4677	80.7338425696819	51.9522141397754	25.962041309164	38.2419637123668	258.922904486774	235.074960222533
g4678	6.21029558228322	68.1872810584552	9.7357654909365	33.461718248321	51.4129212258427	37.7698377335965
g4679	167.677980721647	237.031977012725	220.677351127894	145.199955970393	128.842019457533	140.932230349241
g4680	223.570640962196	142.868588884382	227.167861455185	120.103667284152	149.2833013907	222.6729239518
g4681	633.450149392889	1078.00844340034	817.804301238666	872.394797188368	464.574589390145	644.342157156728
g4682	27.9463301202745	3.24701338373596	61.6598481092645	16.7308591241605	18.5829835756058	20.2942411702906
g4683	624.134706019464	392.888619432051	610.107970765354	283.827074427722	364.226478081873	253.678014628633
g4684	0	0	0	0	6.81376064438879	7.32847597816051
g4685	0	0	12.981020654582	5.37777614705158	0	1.69118676419089
g4686	15.5257389557081	0	3.2452551636455	6.57283751306305	7.43319343024232	11.8383073493362
g4687	0	0	0	0	0	0
g4688	0	0	0	0	0	0
g10936	1391.10621043144	1993.66621761388	1726.47574705941	1555.37236786392	1604.33091536063	2041.8261532998
g10937	422.300099595259	211.055869942838	308.299240546322	57.3629455685502	75.5707998741302	115.00069996498
g10938	248.411823291329	597.450462607417	318.035006037259	553.313412463307	514.74864504428	649.979446370698
g4689	71.4183991962571	6.49402676747192	64.90510327291	11.3530829771089	32.8299376502369	31.0050906768329
g4690	133.521355019089	201.31482979163	116.829185891238	202.562901538943	132.558616172655	109.363410751011
g4691	0	0	0	2.98765341502866	5.57489507268174	2.81864460698481
g4692	2549.32633652726	2509.9413456279	2222.99978709717	890.918248361545	695.003585727657	677.602163519149
g4693	1220.32308191865	1844.30360196203	1239.68747251258	1174.74532278927	1144.09235547146	1085.17817368915
g4694	229.780936544479	263.008084082613	129.81020654582	758.266436734273	719.161464375944	673.65606106937
g4695	189.414015259638	220.796910094045	314.789750873614	136.834526408312	107.781304738514	111.618326436599
g4696	90.0492859431068	97.4104015120788	45.433572291037	160.138223045536	149.2833013907	165.17257396931
g4697	161.467685139364	136.37456211691	240.148882109767	420.661600836035	434.222382883322	423.924148890516
g4698	27.9463301202745	42.2111739885675	3.2452551636455	76.4839274247336	66.2793080863273	54.6817053755053
g4699	304.304483531878	435.099793420619	412.147405782979	506.108488505854	562.444969555002	528.213999348954
g4700	273.253005620462	383.147579280843	337.506537019132	248.572764130384	287.416812636036	261.570219528191
g4701	735.920026500562	545.498248467642	379.694854146523	421.259131519041	404.489609162353	329.781419017223
g4702	27.9463301202745	51.9522141397754	77.886123927492	132.651811627272	125.125422742412	156.152911226959
g4703	602.398671481473	935.139854515957	658.786798220037	3272.07802013938	1927.67482957617	2151.75329297221
g4704	99.3647293165316	227.290936861517	107.093420400301	555.106004512324	494.926795896968	491.007890536754
g4705	707.973696380287	405.876672966995	655.541543056391	162.528345777559	282.461350349208	313.433280296711
g4706	43.4720690759826	71.4342944421912	58.414592945619	91.4221944998769	86.7205900194937	70.4661151746203
g4707	2723.21461283119	1334.52250071548	2599.44938608005	1065.39720779922	1243.82103399388	1243.0222716803
g4708	419.194951804118	418.864726501939	318.035006037259	818.617035717852	727.21409059204	594.734012073795
g4709	307.40963132302	853.964519922558	382.940109310169	1169.36754664222	766.238356100812	762.161501728693
g4710	77.6286947785403	77.9283212096631	68.1503584365555	133.249342310278	97.8703801648572	111.618326436599
g10939	1012.27817991217	1305.29938026186	1288.36629996726	301.752994917894	262.020068416042	192.795291117761
g10940	0	0	0	0	0	0
g4711	15.5257389557081	0	0	1.79259204901719	0	1.69118676419089
g4712	0	0	0	1.79259204901719	3.09716392926763	3.38237352838177
g4713	0	0	12.981020654582	0	0	0
g4714	0	0	0	0	0	0
g4715	0	0	0	0	0	0.563728921396962
g4716	366.40743935471	198.067816407894	256.375157927995	262.913500522522	287.416812636036	265.516321977969
g4717	512.349385538366	457.828887106771	710.710880838365	0	0	3.94610244977874
g4718	124.205911645664	64.9402676747192	249.884647600704	0	1.85829835756058	0
g4719	0	0	0	0	0.619432785853526	0
g4720	0	0	0	0	0	0
g4721	0	0	0	0	0	0
g4722	0	0	0	0	0	0
g4723	0	0	0	0	4.33602950097468	2.25491568558785
g4724	239.096379917904	188.326776256686	204.451075309666	113.530829771089	133.797481744362	98.0888323230714
g4725	0	3.24701338373596	0	2.98765341502866	0.619432785853526	5.07356029257266
g4726	124.205911645664	279.243151001293	110.338675563947	164.918468509582	126.364288314119	157.280369069752
g4727	552.716306823207	366.912512362164	580.900674292545	430.222091764127	469.530051676973	521.44925229219
g4728	2561.74692769183	3133.3679153052	2047.75600826031	998.473771302577	1087.10453917294	1061.50155899048
g4729	341.566257025577	357.171472210956	347.242302510068	391.382597368754	382.190028871626	372.624817043392
g4730	142.836798392514	175.338722721742	126.564951382174	563.471434074405	482.538140179897	492.135348379548
g4731	71.4183991962571	74.6813078259271	107.093420400301	115.323421820106	143.088973532165	129.093922999904
g4732	1530.83786103281	759.801131794215	1122.85828662134	1074.95769872731	750.752536454474	715.372001252745
g4733	129031.311313099	79792.1068919275	123777.277196603	84.2518263038081	92.9149178780289	157.844097991149
g4734	21.7360345379913	19.4820803024158	25.962041309164	0	0	0
g4735	621.029558228322	379.900565897108	548.448122656089	562.873903391399	694.384152941803	771.744893392441
g4736	130.416207227948	159.103655803062	58.414592945619	146.395017336404	144.947271889725	113.309513200789
g4737	4350.3120553894	5110.7990660004	4634.22437368577	256.340663009459	338.210301076025	366.423798908026
g4738	562.031750196632	464.322913874242	454.33572291037	5.37777614705158	18.5829835756058	21.9854279344815
g4739	2574.1675188564	3165.83804914256	2586.46836542546	1443.03659945884	1209.13279798608	1300.52262166279
g4740	214.255197588771	483.804994176658	353.73281283736	160.735753728542	163.530255465331	188.849188667982
g4741	33417.600528266	32359.7353823126	36574.0256942848	1698.77973178529	1370.80475509385	1454.98434612556
g4742	729.709730918279	711.095931038176	567.919653637962	1951.53521069672	2671.61360538626	2610.06490606794
g4743	155.257389557081	224.043923477781	133.055461709466	598.128213688737	530.853897476472	470.713649366464
g4744	639.660444975172	688.366837352024	629.579501747227	497.743058943774	1113.74014896464	1324.19923636146
g4745	34.1566257025577	71.4342944421912	90.867144582074	60.9481296665846	69.9959048014485	63.7013681178567
g4746	155.257389557081	240.278990396461	184.979544327793	348.360388192341	336.352002718465	346.693286659132
g4747	133.521355019089	373.406539129636	318.035006037259	555.106004512324	555.631208910613	509.610944942854
g4748	21.7360345379913	90.9163747446069	84.376634254783	71.106151277682	74.9513670882767	56.3728921396962
g4749	21.7360345379913	3.24701338373596	9.7357654909365	44.8148012254299	73.0930687307161	73.2847597816051
g4750	10582.3436722106	9864.42665978985	15385.7547308433	774.997295858434	637.396336643279	729.465224287669
g4751	7228.78405777767	6114.12620157482	10624.9654057754	850.883692600161	811.456949468119	943.118485497118
g4752	1881.71956143182	1857.29165549697	1849.79544327793	1227.92555357678	1166.39193576219	1315.17957361911
g4753	3.10514779114161	3.24701338373596	29.2072964728095	5.97530683005731	6.81376064438879	12.9657651921301
g10941	0	0	0	0	0	0
g10942	0	0	0	0	0	0
g4754	9.31544337342484	19.4820803024158	32.452551636455	72.3012126436935	86.1011572336402	98.0888323230714
g4755	419.194951804118	551.992275235113	408.902150619333	804.276299325714	723.497493876919	779.637098291999
g4756	621.029558228322	678.625797200816	574.410163965254	804.276299325714	931.00747713785	737.921158108624
g4757	1229.63852529208	1522.84927697217	1100.14150047582	1249.43665816498	1264.26231592705	1285.30194078507
g4758	934.649485133625	1181.91287167989	918.407211311677	1263.77739455712	1104.44865717684	1013.58460067174
g4759	596.18837589919	662.390730282136	665.277308547327	325.654222238124	291.133409351157	307.232262161344
g4760	105.575024898815	107.151441663287	84.376634254783	195.392533342874	144.947271889725	148.824435248798
g4761	136.626502810231	58.4462409072473	103.848165236656	109.945645673055	140.61124238875	110.490868593805
g4762	1142.69438714011	863.705560073766	908.67144582074	963.816991688245	1302.04771586411	1177.06598787686
g4763	347.776552607861	516.275128014018	262.865668255286	573.031925002496	588.46114656085	559.782818947184
g4764	223.570640962196	126.633521965702	191.470054655085	283.827074427722	398.295281303817	341.055997445162
g4765	164.572832930505	113.645468430759	152.526992691339	184.636981048771	299.186035567253	237.893604829518
g4766	689.342809633438	87.669361360871	236.903626946122	98.5925626959457	132.558616172655	153.334266619974
g4767	99.3647293165316	168.84469595427	103.848165236656	557.496127244347	468.910618891119	436.326185161249
g4768	21.7360345379913	19.4820803024158	42.1883171273915	62.7407217156018	49.5546228682821	40.5884823405813
g4769	127.311059436806	152.60962903559	142.791227200402	296.375218770843	309.716392926763	268.334966584954
g4770	900.492859431067	857.211533306294	752.899197965756	1104.8342328776	1058.61063102368	1137.60496337907
g4771	608.608967063756	613.685529526097	739.918177311174	438.587521326207	487.493602466725	449.291950353379
g4772	31.0514779114161	12.9880535349438	64.90510327291	2.98765341502866	43.3602950097468	21.4216990130846
g4773	170.783128512789	146.115602268118	162.262758182275	200.17277880692	234.145593052633	227.182755322976
g4774	12.4205911645664	16.2350669186798	0	66.3259058136362	56.9878162985244	49.0444161615357
g4775	27.9463301202745	45.4581873723035	16.2262758182275	220.488822029115	220.518071763855	227.182755322976
g4776	503.033942164941	681.872810584552	434.864191928497	978.755258763388	984.278696721253	940.299840890133
g4777	139.731650601373	123.386508581967	262.865668255286	63.3382523986075	133.797481744362	82.3044225239565
g4778	71.4183991962571	74.6813078259271	64.90510327291	108.153053624037	114.595065382902	123.456633785935
g4779	121.100763854523	178.585736105478	136.300716873111	279.046828963677	294.850006066279	321.889214117666
g4780	844.600199190518	454.581873723035	840.521087384185	332.227059751187	408.825638663327	462.821444466906
g4781	232.886084335621	155.856642419326	230.413116618831	151.17526280045	144.947271889725	113.873242122186
g10943	335.355961443294	428.605766653147	253.129902764349	228.256720908189	237.862189767754	213.653261209449
g10944	624.134706019464	1250.10015273835	876.218894184285	809.654075472766	849.242349405185	1024.85917909968
g4782	0	0	0	0	0	0
g4783	0	0	0	0	0	0
g4784	77.6286947785403	97.4104015120788	77.886123927492	119.506136601146	170.34401610972	136.986127899462
g4785	0	16.2350669186798	0	2.98765341502866	2.47773114341411	1.69118676419089
g4786	46.5772168671242	3.24701338373596	103.848165236656	56.1678842025387	47.6963245107215	40.0247534191843
g4787	0	0	0	0	0	0
g4788	0	0	6.490510327291	0	0.619432785853526	1.69118676419089
g4789	15.5257389557081	16.2350669186798	19.471530981873	19.7185125391891	11.769222931217	27.0589882270542
g4790	24.8411823291329	19.4820803024158	51.924082618328	8.36542956208024	16.7246852180452	11.2745784279392
g4791	0	0	0	0	4.95546228682821	0
g4792	9.31544337342484	12.9880535349438	19.471530981873	34.6567796143324	28.4939081492622	29.877632834039
g4793	0	9.74104015120789	0	11.3530829771089	8.67205900194937	5.07356029257266
g4794	31.0514779114161	0	3.2452551636455	7.76789887907451	15.4858196463382	18.6030544060998
g4795	12.4205911645664	6.49402676747192	55.1693377819735	62.1431910325961	92.9149178780289	76.6671333099869
g4796	0	19.4820803024158	0	2.98765341502866	5.57489507268174	9.58339166374836
g4797	0	0	12.981020654582	4.18271478104012	3.71659671512116	1.12745784279392
g4798	0	9.74104015120789	16.2262758182275	11.9506136601146	5.57489507268174	10.7108495065423
g4799	37.2617734936993	42.2111739885675	81.1313790911375	13.7432057091318	19.8218491473128	14.656951956321
g4800	34.1566257025577	19.4820803024158	25.962041309164	7.76789887907451	3.71659671512116	11.8383073493362
g4801	0	0	0	0	0	0
g4802	96.25958152539	16.2350669186798	29.2072964728095	32.2666568823095	65.6598753004738	77.7945911527808
g4803	226.675788753338	68.1872810584552	262.865668255286	20.9135739052006	41.5019966521863	31.5688195982299
g4804	0	0	0	1.19506136601146	3.71659671512116	2.81864460698481
g4805	0	0	32.452551636455	3.58518409803439	9.29149178780289	15.7844097991149
g4806	2288.49392207137	1850.7976287295	4741.31779408608	188.819695829811	758.80516267057	364.168883222438
g4807	124.205911645664	194.820803024158	168.753268509566	246.182641398361	254.586874985799	309.487177846932
g10945	0	0	0	0	0	0
g4808	167.677980721647	165.597682570534	162.262758182275	106.36046157502	125.744855528266	109.927139672408
g4809	12.4205911645664	6.49402676747192	6.490510327291	37.0469023463553	29.7327737209693	23.6766146986724
g4810	422.300099595259	818.247372701462	490.033529710471	992.49846447252	1154.62271283097	1011.32968498615
g4811	4058.42816302209	1896.2558161018	4861.39223514096	96.2024399639227	134.416914530215	506.228571414472
g4812	614.819262646039	610.438516142361	619.843736256291	797.703461812651	742.699910238378	644.342157156728
g4813	76563.6290861787	117905.54999022	65051.1397552741	30368.3019024003	26711.8000243616	20649.9541196921
g4814	332.250813652152	308.466271454916	285.582454400804	148.785140068427	150.522166962407	142.059688192035
g4815	327549.619896364	103170.603254826	514944.108346613	42846.535155609	72531.243193947	88291.7873981136
g4816	270.14785782932	123.386508581967	240.148882109767	44.8148012254299	35.9271015795045	46.7895004759479
g4817	254.622118873612	360.418485594692	269.356178582576	434.404806545167	576.691923629633	700.151320375027
g4818	3114.46323451504	2396.29587719714	3631.44052811931	421.259131519041	460.23855988917	511.302131707045
g4819	37.2617734936993	55.1992275235113	32.452551636455	172.686367388656	141.230675174604	188.849188667982
g4820	6843.74573167611	5945.28150562055	6201.68261772655	2261.05610449369	2934.25310658815	3358.1331847617
g4821	459.561873088959	396.135632815787	616.598481092645	1578.67606450114	2389.15225503705	1394.10162261469
g4822	19345.0707388122	16806.5412742173	18170.1836612512	6796.91151919019	6277.95128462549	5901.6780781048
g4823	227250.241094699	192064.088661366	259026.531396693	506.70601918886	578.550221987194	2713.79102760498
g4824	46.5772168671242	32.4701338373596	25.962041309164	55.570353519533	55.1295179409638	63.1376391964598
g4825	521.664828911791	623.426569677305	428.373681601206	1208.80457172059	1234.52954220608	1134.22258985069
g10946	0	0	0	0	0	0
g10947	24.8411823291329	6.49402676747192	29.2072964728095	10.7555522941032	3.71659671512116	11.8383073493362
g4826	0	19.4820803024158	12.981020654582	16.1333284411547	18.5829835756058	29.877632834039
g4827	372.617734936993	1334.52250071548	561.429143310672	317.288792676043	292.372274922864	328.653961174429
g4828	108.680172689956	64.9402676747192	25.962041309164	470.854178208516	354.934986294071	218.163092580624
g4829	0	0	0	0	0	0
g4830	15.5257389557081	0	0	0	0	0
g4831	6322.08090276432	5841.377077341	4955.50463488668	836.542956208024	1316.29466993874	889.00050904301
g4832	170.783128512789	263.008084082613	275.846688909868	642.943014914167	524.040136832083	439.708558689631
g4833	55.892660240549	19.4820803024158	0	62.1431910325961	68.1376064438879	55.8091632182993
g4834	15.5257389557081	19.4820803024158	22.7167861455185	92.6172558658884	68.1376064438879	82.8681514453535
g4835	586.872932525765	607.191502758625	623.088991419936	1336.07860720082	1009.67544094125	890.127966885804
g4836	108.680172689956	175.338722721742	175.243778836857	311.313485845986	263.878366773602	216.471905816434
g4837	0	0	0	0	0	0
g4838	0	0	0	3.58518409803439	0	0.563728921396962
g4839	31526.5655234608	25709.8519724213	34714.4944855159	1943.76731181764	1495.31074505041	2341.16621056158
g4840	220.465493171054	188.326776256686	142.791227200402	105.762930892014	78.0485310175443	63.1376391964598
g4841	235.991232126763	324.701338373596	269.356178582576	309.520893796969	310.95525849847	341.055997445162
g4842	1490.47093974797	1065.0203898654	1470.10058913141	656.686220623299	1417.88164681872	1538.41622649231
g10948	0	0	0	0	0	0
g4843	363.302291563569	376.653552513372	301.808730219032	496.547997577763	475.724379535508	433.507540554264
g4844	226.675788753338	263.008084082613	298.563475055386	377.639391659622	456.521963174049	397.992618506255
g4845	1406.63194938715	1389.72172823899	1155.3108382578	569.446740904462	508.554317185745	522.012981213587
g4846	117.995616063381	272.749124233821	236.903626946122	185.832042414782	187.068701327765	237.893604829518
g4847	698.658253006863	802.012305782783	532.221846837862	819.812097083863	519.704107331109	595.297740995192
g4848	1763.72394536844	2480.71822517427	3099.21868128145	376.444330293611	173.441180038987	220.418008266212
g4849	1077.48628352614	1730.65813353127	1382.47869971298	715.24422755786	628.724277641329	659.562838034446
g4850	4154.68774454748	3867.19294002953	6529.45338925475	114.128360454095	139.991809602897	218.163092580624
g4851	0	9.74104015120789	0	2.39012273202293	3.09716392926763	0
g4852	1077.48628352614	2428.7660110345	1223.46119669435	3223.08050413291	2119.07956040491	1802.80509062749
g4853	43.4720690759826	87.669361360871	64.90510327291	75.8863967417279	47.6963245107215	37.7698377335965
g4854	43.4720690759826	25.9761070698877	32.452551636455	32.8641875653152	25.3967442199946	26.4952593056572
g4855	108.680172689956	126.633521965702	61.6598481092645	151.17526280045	116.453363740463	209.143429838273
g4856	0	0	0	0	0	0
g4857	0	19.4820803024158	0	21.5111045882063	24.1578786482875	23.1128857772755
g4858	186.308867468497	256.514057315141	214.186840800603	437.989990643201	389.003789516015	315.124467060902
g4859	0	0	0	0	0	0
g4860	0	0	0	0	0	0
g787	298.094187949595	263.008084082613	613.353225929	314.89866994402	387.145491158454	459.439070938524
g788	285.673596785028	347.430432059748	386.185364473815	298.765341502866	305.999796211642	280.737002855687
g789	90.0492859431068	123.386508581967	61.6598481092645	195.392533342874	236.003891410194	221.545466109006
g790	1179.95616063381	311.713284838652	1346.78089291288	45.4123319084356	117.69222931217	111.618326436599
g791	1341.42384577318	899.422707294861	1126.10354178499	424.844315617075	532.712195834033	454.365510645952
g792	782.497243367686	1438.42692899503	941.123997457195	2887.26826028369	3065.5728571891	2606.68253253955
g793	71.4183991962571	22.7290936861517	71.395613600201	87.2394797188368	106.542439166807	91.8878141877049
g794	239.096379917904	305.21925807118	269.356178582576	381.822106440662	498.023959826235	528.777728270351
g795	291.883892367312	172.091709338006	272.601433746222	358.518409803439	563.683835126709	587.969265017032
g796	2095.97475902059	3071.67466101422	2427.45086240683	1211.19469445262	1350.36347316069	1104.34495701665
g797	813.548721279102	240.278990396461	872.97363902064	154.760446898484	281.841917563354	350.075660187514
g798	96.25958152539	298.725231303708	243.394137273412	380.029514391645	362.368179724313	393.48278713508
g799	378.828030519277	311.713284838652	214.186840800603	216.90363793108	275.647589704819	214.780719052243
g800	459.561873088959	379.900565897108	418.637916110269	566.459087489433	503.598854898917	544.562138069466
g801	611.714114854898	1042.29129617924	528.976591674216	489.377629381694	485.635304109165	443.090932218012
g802	832.179608025952	1604.02461156557	911.916700984386	1599.58963840634	1300.80885029241	1175.93853003406
g803	381.933178310418	360.418485594692	515.995571019635	558.093657927353	798.448860965195	624.047915986437
g804	27583.0278287109	24596.1263817999	38965.7787498915	218.098699297092	262.639501201895	385.590582235522
g805	133.521355019089	233.784963628989	207.696330473312	186.429573097788	224.234668478977	203.506140624303
g806	394.353769474985	532.510194932698	564.674398474317	198.380186757903	192.643596400447	285.246834226863
g807	7197.73257986626	10341.737627199	6561.9059408912	7395.03973287893	9113.71457826293	9542.23945248638
g808	1096.11717027299	1918.98490978795	1609.64656116817	1002.05895540061	543.861985979396	931.843907069179
g809	2080.44902006488	2315.12054260374	2502.09173117068	942.903417783044	783.582474104711	803.877441912068
g810	3409.45227467349	2415.77795749956	3303.66975659112	1304.40948100151	1755.47251510889	2031.67903271465
g811	4530.41062727561	4341.25689405498	3738.53394851962	2555.63873121551	3173.35416192762	3543.03627097991
g812	1782.35483211529	2117.05272619585	2102.92534604228	3312.11257590077	3501.03410564413	3419.01590827258
g813	602.398671481473	607.191502758625	467.316743564952	527.619593094061	633.060307142304	647.160801763713
g814	43.4720690759826	38.9641606048315	51.924082618328	62.1431910325961	52.0323540116962	54.1179764541084
g815	540.29571565864	448.087846955563	512.750315855989	130.859219578255	146.805570247286	131.348838685492
g816	3136.19926905303	3961.35632815787	2962.91796440834	2123.62404740237	1263.02345035534	1631.99522744421
g817	248.411823291329	451.334860339299	405.656895455688	414.686294005978	379.092864942358	410.394654776989
g818	313.619926905303	412.370699734467	434.864191928497	187.6246344638	1207.89393241438	1804.49627739168
g819	9287.49704330456	7507.09494319754	12747.3622827995	532.399838558107	577.93078920134	648.288259606507
g820	1319.68781123519	2639.82188097734	2982.38949539021	1387.46624593931	804.023756037877	948.755774711088
g821	139.731650601373	90.9163747446069	113.583930727593	164.918468509582	158.574793178503	129.093922999904
g822	155.257389557081	71.4342944421912	262.865668255286	249.17029481339	324.582779787248	238.457333750915
g823	1403.52680159601	983.845055271996	1840.059677787	191.209818561834	242.817652054582	216.471905816434
g824	763.866356620837	564.980328770057	804.823280584084	445.16035883927	582.886251488168	504.537384650281
g825	866.33623372851	1552.07239742579	960.595528439068	1801.55500926228	1720.7842791011	1578.44097991149
g826	0	0	0	0.597530683005731	0	0.563728921396962
g827	0	0	0	0	1.85829835756058	0
g828	155.257389557081	175.338722721742	123.319696218529	458.903564548402	366.084776439434	355.712949401483
g829	3.10514779114161	68.1872810584552	16.2262758182275	93.2147865488941	87.9594555912007	82.8681514453535
g830	316.725074696444	474.06395402545	438.109447092142	483.999853234642	669.606841507662	563.728921396962
g831	332.250813652152	275.996137617557	292.072964728095	524.631939679032	535.189926977447	577.258415510489
g832	1984.18943853949	2178.74598048683	2440.43188306142	922.587374560849	954.545923000284	891.255424728597
g833	1710.93643291903	1237.1120992034	1434.40278233131	339.994958630261	387.145491158454	423.924148890516
g834	0	0	0	0	0	0
g835	145.941946183656	259.761070698877	155.772247854984	277.254236914659	291.133409351157	235.63868914393
g836	0	0	0	0	0	0
g837	0	3.24701338373596	9.7357654909365	0	1.23886557170705	0
g4861	99.3647293165316	45.4581873723035	38.943061963746	67.5209671796476	68.7570392297414	74.412217624399
g4862	3111.3580867239	3000.24036657203	3319.89603240935	2677.53499054868	2456.05099590923	2251.53331205947
g4863	167.677980721647	162.350669186798	110.338675563947	175.674020803685	147.425003033139	157.844097991149
g4864	0	29.2231204536237	0	34.0592489313267	27.8744753634087	36.0786509694056
g4865	49.6823646582658	84.422347977135	107.093420400301	133.249342310278	77.4290982316908	85.1230671309413
g4866	183.203719677355	94.1633881283429	178.489034000502	0	23.538445862434	37.2061088121995
g4867	695.553105215721	337.68939190854	532.221846837862	175.076490120679	158.574793178503	212.525803366655
g4868	1015.38332770331	1084.50247016781	675.013074038264	995.486117887548	981.800965577839	942.554756575721
g4869	1263.79515099464	1269.58223304076	1895.22901556897	295.180157404831	480.060409036483	443.654661139409
g4870	13774.4356015042	15666.839576526	17440.0012494309	12070.1197967158	10531.5962250817	8842.65186103275
g4871	723.499435335996	789.024252247839	898.935680329804	1414.35512667457	1505.84110240992	1345.05720645315
g4872	1183.06130842495	1370.23964793658	1226.706451858	1594.8093929423	1648.31064315623	1670.8925230206
g4873	316.725074696444	324.701338373596	356.978068001005	489.9751600647	536.428792549154	497.208908672121
g4874	291.883892367312	207.808856559102	282.337199237159	149.980201434439	122.647691598998	108.799681829614
g4875	21.7360345379913	12.9880535349438	35.6978068001005	106.36046157502	142.469540746311	89.632898502117
g4876	484.403055418091	555.239288618849	512.750315855989	691.940530920637	738.363880737403	713.117085567157
g4877	1828.93204898241	3587.94978902824	2219.75453193352	3704.09270395253	2847.53251656866	3366.58911858266
g4878	1226.53337750094	974.104015120789	1044.97216269385	1083.32312828939	1078.43248017099	997.236461951226
g4879	462.6670208801	357.171472210956	509.505060692344	900.478739289637	644.210097287667	550.199427283435
g4880	1993.50488191291	633.167609828512	2852.57928884439	135.639465042301	506.076586042331	613.900795401292
g4881	2779.10727307174	3951.61528800667	2992.12526088115	16297.0518482983	12201.5870157428	9048.41291734264
g4882	403.66921284841	327.948351757332	418.637916110269	647.723260378213	675.181736580344	665.200127248416
g4883	3216.93311162271	3526.25653473725	3358.83909437309	1706.54763066437	1825.46841991034	1695.69659556206
g4884	152.152241765939	243.526003780197	155.772247854984	274.266583499631	259.542337272628	273.408526877527
g4885	77.6286947785403	136.37456211691	45.433572291037	259.328316424487	232.906727480926	215.34444797364
g4886	465.772168671242	1019.56220249309	775.615984111275	919.599721145821	846.145185475917	554.709258654611
g4887	195.624310841922	275.996137617557	204.451075309666	152.370324166462	131.939183386801	158.971555833943
g4888	0	3.24701338373596	0	5.37777614705158	12.3886557170705	7.32847597816051
g4889	8259.69312443669	8854.60549744797	10706.0967848665	3205.15458364274	2544.62988428629	2769.03646190188
g4890	0	0	3.2452551636455	7.17036819606878	6.19432785853526	5.63728921396962
g4891	96.25958152539	178.585736105478	230.413116618831	99.7876240619571	131.319750600948	141.495959270638
g4892	0	0	0	0	0	0
g4893	0	19.4820803024158	12.981020654582	21.5111045882063	24.7773114341411	18.0393254847028
g4894	6.21029558228322	16.2350669186798	0	49.5950466894757	36.546534365358	34.9511931266117
g4895	0	0	0	0	0	0
g4896	0	0	0	0	0	0
g4897	12.4205911645664	0	3.2452551636455	0	1.23886557170705	3.94610244977874
g4898	74.5235469873987	123.386508581967	113.583930727593	174.478959437674	200.076789830689	174.192236711661
g4899	127.311059436806	298.725231303708	64.90510327291	326.849283604135	284.939081492622	235.63868914393
g4900	285.673596785028	405.876672966995	522.486081346926	348.957918875347	346.882360077975	277.354629327305
g4901	782.497243367686	1217.63001890099	668.522563710973	2310.05362050016	2169.25361605905	2060.99293662729
g4902	99.3647293165316	155.856642419326	42.1883171273915	134.44440367629	92.2954850921754	111.618326436599
g4903	695.553105215721	214.302883326573	528.976591674216	383.017167806674	719.161464375944	542.870951305275
g4904	642.765592766314	314.960298222388	980.067059420941	262.913500522522	250.250845484825	193.922748960555
g4905	198.729458633063	256.514057315141	113.583930727593	378.834453025634	375.376268227237	403.629907720225
g4906	0	3.24701338373596	6.490510327291	16.1333284411547	29.7327737209693	18.6030544060998
g4907	93.1544337342484	123.386508581967	94.1123997457195	178.661674218714	175.918911182401	148.824435248798
g4908	0	0	0	0.597530683005731	0	0
g4909	217.360345379913	324.701338373596	314.789750873614	505.510957822849	471.388350034534	472.968565052051
g4910	27.9463301202745	110.398455047023	87.6218894184285	139.822179823341	83.623426090226	201.251224938716
g4911	608.608967063756	266.255097466349	519.24082618328	135.041934359295	97.8703801648572	122.329175943141
g4912	773.181799994261	776.036198712895	720.446646329301	948.281193930096	805.882054395438	795.421508091114
g4913	332.250813652152	201.31482979163	340.751792182778	208.538208369	196.979625901421	241.2759783579
g4914	77.6286947785403	136.37456211691	152.526992691339	75.8863967417279	86.7205900194937	102.03493477285
g4915	301.199335740736	435.099793420619	392.675874801106	207.343147002989	253.348009414092	244.094622964885
g4916	0	0	0	0	0	0
g4917	568.242045778915	1194.90092521483	477.052509055888	7447.62243298344	11497.2919382273	6553.34871123969
g4918	676.922218468871	1428.68588884382	687.994094692846	1389.25883798833	932.865775495411	797.676423776702
g4919	884.967120475359	526.016168165226	801.578025420439	728.389902583987	1022.68352944417	925.079160012415
g4920	12.4205911645664	61.6932542909833	6.490510327291	84.8493569868138	117.69222931217	62.5739102750628
g4921	74.5235469873987	133.127548733174	116.829185891238	149.980201434439	169.105150538013	175.319694554455
g4922	3322.50813652153	3620.4199228656	3011.59679186302	4013.01606706649	4148.34136686107	4011.49500466078
g4923	506.139089956083	399.382646199523	470.561998728598	554.508473829319	472.007782820387	543.434680226672
g4924	155.257389557081	142.868588884382	97.357654909365	107.555522941032	115.214498168756	162.917658283722
g4925	366.40743935471	555.239288618849	282.337199237159	608.286235299835	647.307261216935	730.028953209066
g4926	142.836798392514	253.267043931405	155.772247854984	178.064143535708	183.971537398497	194.486477881952
g4927	93.1544337342484	19.4820803024158	42.1883171273915	5.97530683005731	38.4048327229186	25.3678014628633
g4928	1909.66589155209	1821.57450827587	1408.44074102215	2090.16232915405	1799.45224290449	2219.96449246124
g4929	117.995616063381	64.9402676747192	178.489034000502	394.370250783783	368.562507582848	298.212599418993
g4930	3.10514779114161	0	0	0.597530683005731	0	0
g4931	558.92660240549	360.418485594692	412.147405782979	222.281414078132	252.728576628239	195.050206803349
g4932	18.6308867468497	25.9761070698877	55.1693377819735	60.3505989835789	51.4129212258427	37.7698377335965
g4933	0	3.24701338373596	0	2.39012273202293	4.33602950097468	5.07356029257266
g4934	1192.37675179838	2470.97718502307	1285.12104480362	1531.47114054369	1627.24992843721	1510.22978042246
g4935	0	0	3.2452551636455	8.36542956208024	0.619432785853526	0.563728921396962
g4936	0	6.49402676747192	0	0	2.47773114341411	0
g4937	34.1566257025577	16.2350669186798	58.414592945619	6.57283751306305	65.0404425146203	63.7013681178567
g4938	31.0514779114161	32.4701338373596	6.490510327291	1.79259204901719	11.1497901453635	7.89220489955747
g4939	313.619926905303	162.350669186798	279.091944073513	81.2641728887795	110.878468667781	127.96646515711
g4940	24.8411823291329	3.24701338373596	38.943061963746	16.1333284411547	29.7327737209693	51.2993318471236
g4941	170.783128512789	61.6932542909833	350.487557673714	26.8888807352579	90.4371867346148	139.24104358505
g4942	127.311059436806	19.4820803024158	217.432095964249	12.5481443431204	83.623426090226	65.9562838034446
g4943	0	6.49402676747192	38.943061963746	0	5.57489507268174	2.81864460698481
g4944	0	0	0	0	0	0
g4945	21.7360345379913	22.7290936861517	38.943061963746	6.57283751306305	7.43319343024232	11.2745784279392
g4946	3.10514779114161	9.74104015120789	9.7357654909365	88.4345410848482	94.153783449736	93.5790009518958
g4947	394.353769474985	201.31482979163	441.354702255788	213.915984516052	146.186137461432	171.937321026074
g4948	2639.37562247037	3367.15287893419	2398.24356593402	2724.14238382313	2959.64985080815	2909.40496332972
g4949	1686.0952505899	2233.94520801034	1483.08160978599	1506.37485185745	1019.5863655149	1080.10461339658
g4950	1431.47313171628	1652.7298123216	1577.19400953171	4177.93453557607	4006.49125890061	3793.89564100156
g4951	68.3132514051155	81.175334593399	77.886123927492	128.469096846232	161.052524321917	146.56951956321
g4952	24.8411823291329	74.6813078259271	48.6788274546825	153.565385532473	73.0930687307161	117.255615650568
g4953	40.366921284841	32.4701338373596	16.2262758182275	32.2666568823095	37.7853999370651	34.9511931266117
g4954	0	0	12.981020654582	0	1.23886557170705	1.69118676419089
g4955	40.366921284841	48.7052007560394	42.1883171273915	40.6320864443897	27.2550425775552	43.9708558689631
g4956	121.100763854523	123.386508581967	266.110923418931	183.44191968276	126.983721099973	125.147820550126
g4957	1959.34825621036	2331.35560952242	2875.29607498991	525.229470362038	564.303267912562	488.752974851166
g4958	316.725074696444	402.629659583259	285.582454400804	113.530829771089	76.8096654458373	103.162392615644
g4959	0	6.49402676747192	9.7357654909365	11.9506136601146	6.19432785853526	11.8383073493362
g4960	130.416207227948	48.7052007560394	61.6598481092645	50.1925773724814	52.0323540116962	64.2650970392537
g4961	950.175224089333	889.681667143653	713.95613600201	356.128287071416	337.590868290172	348.384473423323
g4962	83.8389903608235	103.904428279551	81.1313790911375	300.557933551883	278.125320848233	230.565128851358
g4963	105.575024898815	259.761070698877	230.413116618831	536.582553339147	485.015871323311	478.042125344624
g4964	74.5235469873987	162.350669186798	107.093420400301	298.765341502866	247.773114341411	209.143429838273
g4965	0	3.24701338373596	9.7357654909365	2.98765341502866	16.7246852180452	5.07356029257266
g4966	0	0	0	0	0	0
g4967	24.8411823291329	45.4581873723035	35.6978068001005	111.140707039066	126.983721099973	105.981037222629
g4968	34.1566257025577	3.24701338373596	51.924082618328	99.7876240619571	112.736767025342	187.721730825188
g4969	173.88827630393	136.37456211691	175.243778836857	372.859146195576	335.732569932611	387.84549792111
g4970	68.3132514051155	9.74104015120789	6.490510327291	23.9012273202293	47.6963245107215	21.4216990130846
g4971	18.6308867468497	0	45.433572291037	16.1333284411547	19.8218491473128	21.9854279344815
g4972	2130.13138472315	2039.12440498618	2872.05081982627	282.034482378705	300.42490113896	313.433280296711
g4973	0	0	0	0	0	0
g4974	291.883892367312	324.701338373596	220.677351127894	538.375145388164	451.566500887221	528.777728270351
g4975	447.141281924392	334.442378524804	554.938632983381	203.160432221949	272.550425775552	289.192936676642
g4976	1099.22231806413	1457.90900929745	1463.61007880412	1915.68336971637	2203.94185206685	2328.20044536945
g4977	0	0	0	0	0	0
g4978	313.619926905303	324.701338373596	334.261281855487	154.760446898484	127.603153885826	100.343748008659
g4979	409.879508430693	373.406539129636	269.356178582576	1341.45638334787	1245.67933235144	1172.55615650568
g4980	6.21029558228322	29.2231204536237	19.471530981873	28.6814727842751	32.8299376502369	27.6227171484512
g4981	176.993424095072	246.773017163933	175.243778836857	638.162769450121	948.971027927602	898.583900706758
g4982	9.31544337342484	0	0	8.96296024508597	20.4412819331664	19.1667833274967
g4983	21.7360345379913	42.2111739885675	25.962041309164	114.7258911371	201.93508818825	166.863760733501
g4984	0	0	0	0	0	0
g4985	459.561873088959	470.816940641714	447.845212583079	855.663938064207	861.011572336402	744.685905165387
g4986	0	0	0	1.19506136601146	0	0
g4987	31.0514779114161	19.4820803024158	12.981020654582	26.2913500522522	47.6963245107215	22.5491568558785
g4988	0	0	0	0	0	0
g4989	12.4205911645664	38.9641606048315	74.6408687638465	90.8246638168712	102.825842451685	131.912567606889
g4990	9.31544337342484	0	35.6978068001005	3.58518409803439	17.9635507897523	25.3678014628633
g4991	0	0	0	0	0	0
g4992	0	0	0	0	2.47773114341411	0
g4993	0	0	0	0	0	0
g4994	0	0	22.7167861455185	0	0	0
g4995	5669.99986662458	3688.60720392405	5899.87388750752	1492.03411546531	1938.20518693568	1890.74680236541
g4996	217.360345379913	327.948351757332	243.394137273412	251.560417545413	284.939081492622	266.080050899366
g4997	2335.07113893849	3419.10509307397	2602.69464124369	1209.99963308661	1075.95474902758	961.721539903218
g4998	0	0	29.2072964728095	40.6320864443897	28.4939081492622	27.0589882270542
g4999	273.253005620462	185.07976287295	184.979544327793	133.846872993284	159.194225964356	133.60375437108
g5000	55.892660240549	129.880535349438	116.829185891238	138.029587774324	104.684140809246	145.442061720416
g5001	1133.37894376669	2110.55869942837	1538.25094756797	1024.16759067182	1077.81304738514	1054.17308301232
g5002	1440.78857508971	629.920596444777	1664.81589895014	383.61469848968	378.473432156505	417.723130755149
g5003	254.622118873612	282.490164385029	214.186840800603	353.140633656387	351.218389578949	304.977346475757
g5004	751.44576545627	587.709422456209	1096.89624531218	653.69856720827	1032.59445401783	924.515431091018
g5005	372.617734936993	448.087846955563	681.503584365555	143.407363921376	239.720488125315	279.609545012893
g5006	1291.74148111491	1240.35911258714	1577.19400953171	1268.55764002117	1398.67923045726	1696.82405340486
g5007	298.094187949595	194.820803024158	301.808730219032	346.567796143324	415.639399307716	306.668533239948
g5008	794.917834532253	1045.53830956298	889.199914838867	1379.69834706023	1286.56189621777	1310.10601332654
g5009	0	0	0	1.79259204901719	0	2.81864460698481
g5010	0	12.9880535349438	6.490510327291	25.0962886862407	35.307668793651	17.4755965633058
g5011	43.4720690759826	32.4701338373596	25.962041309164	202.562901538943	248.392547127264	153.334266619974
g5012	211.15004979763	71.4342944421912	129.81020654582	123.091320699181	167.246852180452	164.045116126516
g5013	242.201527709046	214.302883326573	230.413116618831	237.817211836281	390.242655087722	401.938720956034
g5014	385.03832610156	837.729453003878	454.33572291037	937.525641635992	874.639093625179	711.989627724363
g5015	506.139089956083	646.155663363456	522.486081346926	730.182494633004	791.015667534953	687.185555182897
g5016	263.937562247037	237.031977012725	441.354702255788	242.597457300327	333.254838789197	328.653961174429
g5017	751.44576545627	899.422707294861	785.351749602211	1505.17979049144	1385.05170916848	1328.70906773264
g5018	260.832414455895	227.290936861517	126.564951382174	455.915911133373	407.58677309162	347.820744501926
g5019	301.199335740736	185.07976287295	204.451075309666	407.515925809909	594.655474419385	505.101113571678
g5020	391.248621683843	396.135632815787	366.713833491942	417.673947421006	568.019864627684	553.581800811817
g5021	16081.5604103224	18878.1358130409	16670.8757756469	14724.3510906272	15841.9934982039	16004.2640784598
g5022	316.725074696444	217.549896710309	285.582454400804	510.291203286895	567.40043184183	571.057397375123
g5023	397.458917266126	672.131770433344	301.808730219032	591.555376175674	613.857890780845	648.288259606507
g5024	55.892660240549	120.139495198231	64.90510327291	400.943088296846	402.631310804792	258.187845999809
g5025	723.499435335996	581.215395688737	840.521087384185	380.627045074651	415.639399307716	491.007890536754
g5026	158.362537348222	136.37456211691	162.262758182275	244.390049349344	275.028156918966	191.667833274967
g5027	621.029558228322	402.629659583259	571.164908801608	846.103447136116	1217.80485698803	1265.00769961478
g5028	31.0514779114161	16.2350669186798	6.490510327291	42.4246784934069	55.1295179409638	50.1718740043296
g5029	2102.18505460287	1578.04850449568	2430.69611757048	220.488822029115	275.647589704819	368.114985672216
g5030	10029.6273653874	12052.9136804279	9323.61808515352	7654.96557998642	8255.18073706994	9197.80108151284
g5031	152.152241765939	181.832749489214	162.262758182275	173.283898071662	197.599058687275	181.520712689822
g5032	363.302291563569	415.617713118203	295.318219891741	177.466612852702	152.999898105821	171.937321026074
g5033	319.830222487586	399.382646199523	428.373681601206	184.039450365765	188.307566899472	148.260706327401
g5034	739.025174291704	827.98841285267	898.935680329804	414.686294005978	520.323540116962	457.747884174333
g5035	493.718498791516	551.992275235113	262.865668255286	720.024473021906	805.262621609584	748.068278693769
g5036	18.6308867468497	6.49402676747192	6.490510327291	1.79259204901719	8.67205900194937	3.38237352838177
g5037	121.100763854523	360.418485594692	483.54301938318	754.083721953233	824.465037971044	1006.25612469358
g5038	217.360345379913	94.1633881283429	214.186840800603	102.775277476986	102.825842451685	130.221380842698
g5039	3695.12587145852	5204.96245412875	5302.74693739675	3456.71500118816	2397.20488125315	2666.43779820763
g5040	9.31544337342484	12.9880535349438	19.471530981873	5.37777614705158	1.85829835756058	4.5098313711757
g5041	1561.88933894423	1009.82116234188	1577.19400953171	424.246784934069	485.635304109165	637.577410099964
g5042	1148.9046827224	1574.80149111194	1285.12104480362	1713.71799886044	1949.9744098669	2220.52822138263
g5043	86.9441381519651	149.362615651854	139.545972036756	57.9604762515559	60.7044130136456	64.2650970392537
g5044	27551.9763507995	17689.7289145935	37816.958421961	852.078753966173	844.286887118356	1195.66904228296
g5045	134043.019848001	136095.318965909	168006.859821928	1503.38719844242	1558.49288920747	3464.11422198433
g5046	1533.94300882396	2246.93326154529	1583.684519859	420.661600836035	289.89454377945	369.24244351501
g5047	707.973696380287	844.22347977135	574.410163965254	1097.06633399852	1123.6510735383	1196.79650012575
g5048	83.8389903608235	51.9522141397754	22.7167861455185	58.5580069345617	79.2873965892514	81.1769646811626
g5049	912.913450595634	951.374921434637	613.353225929	1214.77987855065	1258.06798806851	1183.83073493362
g5050	0	19.4820803024158	9.7357654909365	106.36046157502	99.1092457365642	69.3386573318264
g5051	872.546529310793	941.633881283429	856.747363202412	1389.25883798833	1417.88164681872	1513.04842502945
g5052	34.1566257025577	45.4581873723035	25.962041309164	169.698713973628	266.356097917016	207.452243074082
g5053	46.5772168671242	146.115602268118	87.6218894184285	383.017167806674	330.777107645783	328.090232253032
g5054	124.205911645664	71.4342944421912	68.1503584365555	128.469096846232	88.5788883770543	113.873242122186
g5055	37.2617734936993	12.9880535349438	25.962041309164	32.8641875653152	29.7327737209693	33.2600063624208
g5056	164.572832930505	71.4342944421912	97.357654909365	37.6444330293611	61.3238457994991	37.2061088121995
g5057	0	32.4701338373596	77.886123927492	31.6691261993038	29.7327737209693	20.2942411702906
g5058	161.467685139364	129.880535349438	84.376634254783	268.291276669573	257.684038915067	298.212599418993
g5059	0	0	0	0	0	0
g5060	605.503819272614	889.681667143653	834.030577056894	823.397281181898	694.384152941803	682.675723811721
g5061	34.1566257025577	16.2350669186798	184.979544327793	19.7185125391891	93.5343506638825	472.968565052051
g5062	503.033942164941	623.426569677305	301.808730219032	843.713324404093	739.60274630911	644.905886078125
g5063	101398.601119729	61319.8477518536	113087.406687555	746.913353757164	615.716189138405	2210.38110079749
g5064	0	0	0	0	1.85829835756058	0.563728921396962
g5065	1068.17084015271	1172.17183152868	503.014550365053	660.271404721333	625.007680926208	761.034043885899
g5066	990.542145374174	987.092068655732	1353.27140324017	13.7432057091318	16.1052524321917	7.89220489955747
g5067	1415.94739276057	1396.21575500646	2226.24504226081	37.6444330293611	60.0849802277921	48.4806872401388
g5068	391.248621683843	350.677445443484	408.902150619333	252.755478911424	211.226579976052	201.251224938716
g5069	74.5235469873987	123.386508581967	146.036482364048	108.750584307043	148.663868604846	151.643079855783
g5070	204.939754215346	253.267043931405	210.941585636958	604.7010512018	641.1129333584	549.635698362038
g5071	49.6823646582658	103.904428279551	133.055461709466	158.943161679525	240.339920911168	179.265797004234
g5072	322.935370278728	318.207311606124	201.205820146021	400.34555761384	424.311458309666	423.360419969119
g5073	18.6308867468497	29.2231204536237	0	108.153053624037	99.7286785224177	97.5251034016745
g5074	232.886084335621	100.657414895815	100.602910073011	167.308591241605	139.372376817043	142.623417113431
g5075	1235.84882087436	1250.10015273835	1350.02614807653	2899.21887394381	2541.53272035702	2475.33369385406
g5076	394.353769474985	438.346806804355	321.280261200905	482.207261185625	440.416710741857	405.321094484416
g5077	211.15004979763	288.984191152501	282.337199237159	372.859146195576	286.177947064329	264.952593056572
g5078	496.823646582658	1487.13212975107	522.486081346926	492.962813479728	187.688134113618	389.536684685301
g5079	0	0	0	0	1.23886557170705	0
g5080	7188.41713649283	7779.84406743136	9427.46625039018	2206.68081234017	1714.58995124256	2084.10582240457
g5081	19587.2722665213	16199.3497714587	21889.2460787889	16126.7556036417	13127.6390305938	12520.9830731479
g5082	149.047093974797	61.6932542909833	68.1503584365555	96.2024399639227	86.1011572336402	148.824435248798
g5083	7470.98558548672	6201.79556293569	12994.0016752366	1622.29580436056	1668.7519250894	2072.26751505523
g5084	164.572832930505	220.796910094045	133.055461709466	220.488822029115	234.765025838486	177.010881318646
g5085	788.707538949969	737.072038108063	1061.19843851208	3460.8977159692	1953.69100658202	1796.60407249212
g5086	0	9.74104015120789	35.6978068001005	4.18271478104012	6.19432785853526	4.5098313711757
g838	164.572832930505	191.573789640422	331.016026691841	212.123392467035	226.712399622391	178.702068082837
g839	152.152241765939	162.350669186798	126.564951382174	261.71843915651	189.546432471179	183.211899454013
g840	742.130322082845	876.69361360871	782.106494438566	823.397281181898	672.084572651076	741.867260558402
g841	534.085420076357	672.131770433344	532.221846837862	1082.72559760639	1362.1326960919	1442.58230985483
g842	1620.88714697592	2613.84577390745	1216.97068636706	4869.27753581371	4223.9121667352	4497.99306382636
g843	453.351577506675	402.629659583259	554.938632983381	892.113309727557	1001.0033819393	984.270696759096
g844	102.469877107673	29.2231204536237	35.6978068001005	88.4345410848482	107.16187195266	112.745784279392
g845	950.175224089333	2445.00107795318	1291.61155513091	5360.44775724442	4303.8189961103	3708.20884494922
g846	15.5257389557081	29.2231204536237	32.452551636455	35.2543102973382	13.0080885029241	8.45593382095444
g847	1527.73271324167	2078.08856559102	1632.36334731369	3119.70769597292	1951.83270822446	1480.35214758842
g848	0	0	6.490510327291	6.57283751306305	5.57489507268174	3.38237352838177
g849	0	0	0	0	0	0
g850	0	0	0	0	1.23886557170705	3.94610244977874
g851	0	0	0	0	6.81376064438879	0
g852	394.353769474985	334.442378524804	279.091944073513	568.849210221456	583.505684274022	620.101813536659
g853	456.456725297817	678.625797200816	567.919653637962	748.705945806181	843.048021546649	867.015081108528
g854	93.1544337342484	357.171472210956	178.489034000502	449.940604303316	358.032150223338	366.423798908026
g855	0	0	16.2262758182275	0	0	3.38237352838177
g856	83.8389903608235	71.4342944421912	61.6598481092645	108.750584307043	136.275212887776	95.2701877160866
g857	863.231085937368	1152.68975122627	1100.14150047582	1316.95762534463	1087.10453917294	1174.81107219127
g858	630.345001601747	629.920596444777	577.655419128899	943.50094846605	909.94676241883	799.93133946229
g859	34.1566257025577	48.7052007560394	3.2452551636455	95.0073785979113	109.639603096074	105.417308301232
g860	127.311059436806	103.904428279551	90.867144582074	152.370324166462	100.348111308271	96.9613744802775
g861	655.18618393088	879.940626992446	658.786798220037	1190.87865123042	871.541929695912	909.2947502133
g862	437.825838550967	428.605766653147	314.789750873614	309.520893796969	313.432989641884	270.589882270542
g863	0	0	0	0	1.23886557170705	0
g864	9.31544337342484	0	6.490510327291	26.2913500522522	21.6801475048734	20.8579700916876
g865	229.780936544479	136.37456211691	133.055461709466	436.79492927719	397.675848517964	358.531594008468
g866	180.098571886214	149.362615651854	149.281737527693	357.323348437427	323.963347001394	310.614635689726
g867	549.611159032065	383.147579280843	434.864191928497	640.552892182144	728.452956163747	762.72523065009
g868	43.4720690759826	68.1872810584552	16.2262758182275	99.7876240619571	151.761032534114	131.348838685492
g869	369.512587145852	366.912512362164	616.598481092645	946.488601881078	830.659365829579	894.074069335582
g870	0	0	0	0	0	0
g871	2359.91232126762	3415.85807969023	2554.01581378901	4188.69008787018	5525.34044981346	5447.87629638024
g872	102.469877107673	113.645468430759	94.1123997457195	152.370324166462	170.34401610972	147.133248484607
g873	49.6823646582658	214.302883326573	123.319696218529	349.555449558353	321.48561585798	273.408526877527
g874	931.544337342484	883.187640376182	1424.66701684037	934.537988220964	1148.42838497244	1314.61584469772
g875	183.203719677355	136.37456211691	100.602910073011	110.54317635606	156.097062035089	121.765447021744
g876	242.201527709046	444.840833571827	279.091944073513	620.834379642955	495.546228682821	513.557047392633
g877	77.6286947785403	74.6813078259271	120.074441054884	45.4123319084356	53.8906523692568	43.9708558689631
g878	3549.18392527486	3639.90200316801	3884.57043088366	1533.86126327571	1157.71987676024	1319.68940499029
g879	12731.1059436806	11468.4512713554	15973.1459154632	1565.53038947502	1492.21358112114	1804.49627739168
g880	260.832414455895	188.326776256686	197.960564982376	368.07890073153	393.339819016989	316.815653825093
g881	394.353769474985	415.617713118203	369.959088655587	777.387418590456	807.120919967145	660.126566955843
g882	2123.92108914086	1961.19608377652	2904.50337146272	632.78499330307	649.165559574496	642.08724147114
g883	916.018598386776	1185.15988506363	937.87874229355	1561.94520537698	1648.93007594209	1680.47591468434
g884	152.152241765939	142.868588884382	171.998523673212	162.528345777559	203.173953759957	202.942411702906
g885	8396.31962724692	7490.85987627886	7256.39054591134	7069.38551064081	6057.43321286163	5259.02710771226
g886	1266.90029878578	1565.06045096073	895.690425166158	2160.67094974872	1987.75980980397	2136.53261209449
g887	52.7875124494074	29.2231204536237	32.452551636455	197.782656074897	178.396642325816	169.118676419089
g888	3269.72062407212	2445.00107795318	2284.65963520643	774.997295858434	718.542031590091	899.147629628155
g5087	15.5257389557081	139.621575500646	25.962041309164	119.506136601146	126.983721099973	176.447152397249
g5088	5682.42045778915	5776.43680966628	5257.31336510571	1831.43154341257	2177.925675061	2540.72624873611
g5089	13957.6393211815	9685.84092368437	17926.7895239777	187.027103780794	148.044435818993	311.178364611123
g5090	984.331849791891	1110.4785772377	1178.02762440332	406.320864443897	465.813454961852	457.747884174333
g5091	1717.14672850131	1454.66199591371	2161.3399389879	204.35549358796	296.708304423839	377.698377335965
g5092	1117.85320481098	1146.19572445879	801.578025420439	613.06648076388	435.461248455029	491.007890536754
g5093	524.769976702932	474.06395402545	564.674398474317	247.975233447379	255.206307771653	247.476996493266
g5094	3381.50594455322	3409.36405292276	3439.97047346423	2363.23385128767	2124.03502269174	2107.21870818185
g5095	543.400863449782	201.31482979163	373.204343819233	12.5481443431204	16.1052524321917	17.4755965633058
g5096	69254.1111858314	58108.5515153388	82919.5146863062	1074.36016804431	1271.69550935729	1523.19554561459
g5097	5598.58146742833	6558.96703514664	4416.79227772153	4483.272714592	5076.8711128555	6004.27674179905
g5098	13994.9010946752	10718.3911797124	15823.8641779355	157.748100313513	135.655780101922	213.653261209449
g5099	350.881700399002	292.231204536237	146.036482364048	373.456676878582	358.651583009192	354.021762637292
g5100	658.291331722022	711.095931038176	503.014550365053	617.846726227926	684.473228368147	572.748584139314
g5101	145.941946183656	97.4104015120788	298.563475055386	29.8765341502866	32.8299376502369	25.9315303842603
g5102	406.774360639551	272.749124233821	512.750315855989	234.232027738247	304.760930639935	339.364810680971
g5103	25900.0377259122	33992.9831143318	26766.8645897481	15289.0175860676	14707.8120673061	16181.2749597784
g5104	593.083228108048	711.095931038176	717.201391165656	746.315823074158	665.270812006687	675.347247833561
g5105	971.911258627325	1146.19572445879	957.350273275423	1652.17233851085	1951.83270822446	1965.15901998981
g5106	62.1029558228322	6.49402676747192	32.452551636455	4.78024546404585	4.33602950097468	2.25491568558785
g5107	2620.74473572352	1065.0203898654	4196.11492659363	904.661454070677	841.809155974942	1089.68800506033
g5108	593.083228108048	412.370699734467	623.088991419936	236.024619787264	199.457357044835	268.334966584954
g5109	698.658253006863	662.390730282136	665.277308547327	490.572690747705	463.335723818438	414.340757226767
g5110	130.416207227948	162.350669186798	113.583930727593	244.390049349344	266.356097917016	246.349538650473
g5111	1403.52680159601	1094.24351031902	1070.93420400302	3432.81377386793	2615.86465465944	2545.23608010729
g5112	27.9463301202745	38.9641606048315	19.471530981873	87.2394797188368	137.514078459483	85.6867960523383
g5113	3434.29345700262	3750.30045821504	4510.90467746725	1058.22683960315	983.039831149546	1012.45714282894
g5114	583.767784734623	568.227342153793	902.180935493449	277.851767597665	242.198219268729	239.021062672312
g5115	21.7360345379913	3.24701338373596	35.6978068001005	71.106151277682	58.2266818702315	60.8827235108719
g5116	496.823646582658	824.741399468934	756.144453129402	2090.75985983705	2377.38303210583	2421.77944632135
g5117	735.920026500562	483.804994176658	892.445170002513	1024.16759067182	1067.28269002563	866.451352187131
g5118	145.941946183656	178.585736105478	133.055461709466	171.491306022645	208.129416046785	164.045116126516
g5119	515.454533329508	1116.97260400517	746.408687638465	1219.5601240147	1168.8696669056	1197.36022904715
g5120	2092.86961122945	1694.94098631017	2726.01433746222	403.333211028869	497.404527040382	632.503849807392
g5121	1459.41946183656	2068.34752543981	2057.49177375125	2394.30544680397	2188.45603242051	2137.09634101588
g5122	31.0514779114161	12.9880535349438	87.6218894184285	26.8888807352579	36.546534365358	69.9023862532233
g5123	3021.30880078079	2428.7660110345	2210.01876644259	820.409627766869	976.845503291011	982.015781073508
g5124	68.3132514051155	42.2111739885675	42.1883171273915	221.683883395126	177.777209539962	120.074260257553
g5125	471.982464253525	415.617713118203	421.883171273915	549.728228365273	649.165559574496	541.179764541084
g5126	80.7338425696819	58.4462409072473	32.452551636455	204.953024270966	187.068701327765	168.554947497692
g5127	1034.01421445016	1107.23156385396	1067.68894883937	580.799823881571	504.21828768477	466.767546916685
g5128	24.8411823291329	12.9880535349438	0	22.1086352712121	12.3886557170705	25.9315303842603
g5129	6.21029558228322	51.9522141397754	16.2262758182275	38.8394943953725	73.7125015165696	60.8827235108719
g5130	372.617734936993	402.629659583259	428.373681601206	246.182641398361	272.550425775552	284.683105305466
g5131	155.257389557081	282.490164385029	71.395613600201	720.024473021906	825.084470756897	677.038434597752
g5132	127.311059436806	204.561843175366	87.6218894184285	159.54069236253	203.79338654581	178.702068082837
g5133	3176.56619033787	2746.97332264062	2735.75010295316	871.797266505362	601.469235063774	713.680814488554
g5134	52.7875124494074	253.267043931405	133.055461709466	160.735753728542	158.574793178503	125.147820550126
g5135	512.349385538366	496.793047711602	477.052509055888	721.817065070923	917.999388634926	758.215399278914
g5136	90375.3264611766	49913.0897347892	82598.2344251053	5280.37864572165	15500.0666004128	17530.2782686813
g5137	81370.3978668659	59975.5842109869	93132.3326862986	3641.94951291993	3466.96530242219	4361.5706648483
g5138	52.7875124494074	149.362615651854	207.696330473312	141.614771872358	120.789393241438	101.471205851453
g5139	24.8411823291329	38.9641606048315	45.433572291037	95.0073785979113	92.2954850921754	102.598663694247
g5140	2853.63082005914	474.06395402545	3631.44052811931	427.831969032104	1298.33111914899	1447.6558701474
g5141	158.362537348222	71.4342944421912	136.300716873111	19.7185125391891	50.1740556541356	45.098313711757
g5142	316.725074696444	61.6932542909833	425.128426437561	10.1580216110974	142.469540746311	271.717340113336
g5143	0	12.9880535349438	9.7357654909365	0	0	0
g5144	93.1544337342484	123.386508581967	201.205820146021	66.9234364966419	80.5262621609584	85.6867960523383
g5145	468.877316462383	321.45432498986	412.147405782979	383.017167806674	374.13740265553	330.908876860017
g5146	217.360345379913	311.713284838652	379.694854146523	213.318453833046	196.979625901421	201.251224938716
g5147	15.5257389557081	116.892481814495	42.1883171273915	214.513515199058	218.659773406295	187.721730825188
g5148	1881.71956143182	3048.94556732807	2171.07570447884	1064.20214643321	949.590460713456	1037.82494429181
g5149	71.4183991962571	25.9761070698877	29.2072964728095	2.98765341502866	7.43319343024232	2.25491568558785
g5150	341.566257025577	318.207311606124	331.016026691841	302.3505256009	262.639501201895	256.496659235618
g5151	1307.26722007062	720.836971189383	1139.08456243957	351.945572290376	360.509881366752	405.321094484416
g5152	527.875124494074	457.828887106771	386.185364473815	919.002190462815	929.768611566143	831.500159060519
g5153	80.7338425696819	81.175334593399	55.1693377819735	109.348114990049	132.558616172655	137.549856820859
g5154	1108.53776143756	1233.86508581967	1168.29185891238	2289.14004659496	2019.97031466835	1757.14304799433
g5155	869.441381519651	873.446600224974	704.220370511073	229.451782274201	247.153681555557	196.74139356754
g5156	527.875124494074	438.346806804355	610.107970765354	236.024619787264	411.303369806741	275.663442563115
g5157	391.248621683843	324.701338373596	295.318219891741	947.68366324709	849.242349405185	719.881832623921
g5158	189.414015259638	412.370699734467	197.960564982376	1549.39706103386	1412.30675174604	1452.16570151857
g5159	1108.53776143756	1029.3032426443	885.954659675221	782.765194737508	793.493398678367	768.36251986406
g5160	419.194951804118	526.016168165226	314.789750873614	493.560344162734	421.214294380398	457.747884174333
g5161	0	0	0	0	0	0
g5162	14761.8725990872	19384.6699009037	13620.3359218202	11248.5151075829	12956.0561489124	13238.6099900863
g5163	1717.14672850131	1389.72172823899	1885.49325007804	1342.05391403087	1606.18921371819	1630.86776960141
g5164	167.677980721647	266.255097466349	149.281737527693	438.587521326207	474.485513963801	329.781419017223
g5165	745.235469873987	1165.67780476121	772.370728947629	1389.85636867133	1594.41999078698	1498.39147307313
g5166	5375.01082646613	6390.12233919237	6578.13221670943	8581.13813864531	7189.13691261603	6481.75513822227
g5167	149.047093974797	142.868588884382	97.357654909365	193.599941293857	177.777209539962	197.305122488937
g5168	273.253005620462	347.430432059748	188.224799491439	197.782656074897	188.307566899472	189.412917589379
g5169	186.308867468497	100.657414895815	392.675874801106	135.639465042301	221.137504549709	169.682405340486
g5170	124.205911645664	71.4342944421912	107.093420400301	47.8024546404585	51.4129212258427	46.2257715545509
g5171	0	9.74104015120789	0	7.76789887907451	0	9.0196627423514
g5172	24.8411823291329	0	12.981020654582	31.6691261993038	28.4939081492622	9.58339166374836
g5173	52.7875124494074	12.9880535349438	55.1693377819735	97.3975013299342	80.5262621609584	83.4318803667504
g5174	49.6823646582658	9.74104015120789	35.6978068001005	7.17036819606878	14.2469540746311	8.45593382095444
g5175	21.7360345379913	9.74104015120789	6.490510327291	2.98765341502866	8.67205900194937	7.32847597816051
g5176	0	0	9.7357654909365	1.19506136601146	0	3.94610244977874
g5177	0	3.24701338373596	0	0	0	0
g5178	298.094187949595	279.243151001293	321.280261200905	1058.82437028616	1076.57418181343	990.471714894463
g5179	0	25.9761070698877	19.471530981873	42.4246784934069	37.1659671512116	43.4071269475661
g5180	46.5772168671242	35.7171472210956	16.2262758182275	378.236922342628	363.60704529602	290.320394519436
g5181	2831.89478552115	1535.83733050711	1664.81589895014	626.212155790006	736.505582379843	657.871651270255
g5182	329.145665861011	211.055869942838	220.677351127894	1143.07619658996	1072.23815231245	958.902895296233
g5183	0	16.2350669186798	48.6788274546825	12.5481443431204	9.91092457365642	15.7844097991149
g5184	152.152241765939	116.892481814495	152.526992691339	231.841905006224	245.91481598385	253.678014628633
g5185	0	0	0	3.58518409803439	3.09716392926763	0
g5186	83.8389903608235	42.2111739885675	155.772247854984	139.822179823341	189.546432471179	166.300031812104
g5187	14724.6108255935	13316.0018867012	14882.7401804783	7804.94578142086	6994.63501785802	5637.85294289102
g5188	0	0	6.490510327291	8.36542956208024	1.23886557170705	2.81864460698481
g5189	68.3132514051155	81.175334593399	48.6788274546825	238.414742519287	205.032252117517	330.908876860017
g5190	21.7360345379913	38.9641606048315	16.2262758182275	1.79259204901719	2.47773114341411	13.5294941135271
g5191	12383.3293910727	12614.6469958142	17096.0042020845	563.471434074405	580.408520344754	808.387273283244
g5192	93.1544337342484	136.37456211691	113.583930727593	337.604835898238	247.153681555557	258.187845999809
g5193	1462.5246096277	1308.54639364559	1103.38675563947	1501.5946063934	1329.30275844167	1211.45345208207
g5194	173.88827630393	97.4104015120788	97.357654909365	237.219681153275	193.2630291863	156.716640148356
g5195	49.6823646582658	48.7052007560394	51.924082618328	314.301139261015	179.635507897523	156.716640148356
g5196	1220.32308191865	1152.68975122627	1496.06263044058	564.666495440416	556.87007448232	563.165192475565
g5197	223.570640962196	224.043923477781	272.601433746222	411.101109907943	485.635304109165	383.335666549934
g5198	189.414015259638	64.9402676747192	136.300716873111	94.4098479149056	172.821747253134	112.745784279392
g5199	24.8411823291329	214.302883326573	74.6408687638465	249.17029481339	283.080783135062	242.403436200694
g5200	52.7875124494074	29.2231204536237	110.338675563947	166.113529875593	159.81365875021	170.246134261883
g5201	80.7338425696819	29.2231204536237	94.1123997457195	74.6913353757164	68.7570392297414	72.7210308602081
g5202	195.624310841922	246.773017163933	204.451075309666	412.296171273955	377.853999370651	466.767546916685
g5203	298.094187949595	250.020030547669	159.017503018629	348.360388192341	324.582779787248	278.482087170099
g5204	788.707538949969	457.828887106771	610.107970765354	190.612287878828	233.526160266779	312.869551375314
g5205	49.6823646582658	123.386508581967	84.376634254783	372.859146195576	354.934986294071	321.889214117666
g5206	12.4205911645664	9.74104015120789	103.848165236656	14.3407363921376	10.5303573595099	17.4755965633058
g5207	68.3132514051155	35.7171472210956	74.6408687638465	19.7185125391891	22.2995802907269	21.4216990130846
g5208	447.141281924392	175.338722721742	515.995571019635	69.3135592286648	63.8015769429132	87.9417117379261
g5209	124.205911645664	68.1872810584552	81.1313790911375	85.4468876698196	99.7286785224177	73.2847597816051
g5210	239.096379917904	334.442378524804	340.751792182778	154.162916215479	229.190130765805	222.6729239518
g5211	1738.8827630393	2746.97332264062	1745.94727804128	1901.34263332424	1247.537630709	1866.50645874534
g5212	0	3.24701338373596	0	7.17036819606878	3.71659671512116	14.656951956321
g5213	0	0	0	0	0.619432785853526	0.563728921396962
g5214	43.4720690759826	64.9402676747192	29.2072964728095	126.078974114209	99.7286785224177	89.632898502117
g5215	0	0	0	0	0	0
g5216	0	12.9880535349438	19.471530981873	4.78024546404585	9.91092457365642	16.9118676419089
g5217	0	0	0	0	0	0
g5218	0	0	0	0	0	0
g5219	27.9463301202745	55.1992275235113	12.981020654582	67.5209671796476	86.7205900194937	50.7356029257266
g5220	3.10514779114161	6.49402676747192	0	0	2.47773114341411	3.38237352838177
g5221	1083.69657910842	360.418485594692	967.086038766359	286.217197159745	299.186035567253	223.236652873197
g5222	0	0	0	0	0	1.12745784279392
g5223	729.709730918279	753.307105026743	723.691901492946	500.133181675797	498.643392612089	547.944511597847
g5224	770.07665220312	642.90864997972	769.125473783983	486.389975966665	641.1129333584	485.370601322785
g5225	52.7875124494074	214.302883326573	191.470054655085	122.493790016175	144.947271889725	113.873242122186
g5226	1903.45559596981	1396.21575500646	1668.06115411379	1292.4588673414	2270.22116015317	2341.72993948298
g5227	145.941946183656	120.139495198231	178.489034000502	73.496274009705	107.16187195266	130.785109764095
g5228	18.6308867468497	16.2350669186798	9.7357654909365	36.4493716633496	34.6882360077975	18.0393254847028
g5229	0	0	0	4.18271478104012	2.47773114341411	5.07356029257266
g5230	0	6.49402676747192	0	29.2790034672808	1.85829835756058	6.76474705676355
g5231	43.4720690759826	51.9522141397754	0	41.8271478104012	7.43319343024232	9.0196627423514
g5232	0	29.2231204536237	9.7357654909365	34.0592489313267	1.23886557170705	0.563728921396962
g5233	9.31544337342484	204.561843175366	6.490510327291	171.491306022645	42.1214294380398	26.4952593056572
g5234	0	0	0	0	0	0
g5235	602.398671481473	1974.18413731146	1025.50063171198	2179.79193160491	1370.80475509385	1097.58020995989
g5236	0	25.9761070698877	0	32.8641875653152	53.8906523692568	56.3728921396962
g5237	71.4183991962571	120.139495198231	116.829185891238	148.785140068427	174.060612824841	202.378682781509
g5238	3.10514779114161	9.74104015120789	0	14.9382670751433	3.71659671512116	13.5294941135271
g5239	0	0	0	0	2.47773114341411	0.563728921396962
g5240	0	0	0	0	3.71659671512116	0
g5241	130.416207227948	87.669361360871	139.545972036756	117.713544552129	127.603153885826	133.60375437108
g5242	114.89046827224	48.7052007560394	22.7167861455185	145.199955970393	122.028258813145	156.716640148356
g5243	40.366921284841	19.4820803024158	19.471530981873	18.5234511731777	14.8663868604846	14.656951956321
g5244	0	0	0	0	1.85829835756058	2.25491568558785
g5245	304.304483531878	240.278990396461	305.053985382677	305.935709698934	306.619228997495	289.756665598039
g5246	0	0	0	0	0	2.25491568558785
g5247	372.617734936993	379.900565897108	470.561998728598	1024.16759067182	864.728169051523	967.358829117187
g5248	0	0	0	11.3530829771089	11.1497901453635	1.12745784279392
g5249	0	9.74104015120789	0	0	0	0
g5250	15.5257389557081	19.4820803024158	74.6408687638465	16.1333284411547	25.3967442199946	24.8040725414663
g5251	0	12.9880535349438	9.7357654909365	0	6.19432785853526	7.32847597816051
g5252	0	0	0	4.78024546404585	3.09716392926763	0.563728921396962
g5253	0	0	3.2452551636455	1.19506136601146	1.85829835756058	5.07356029257266
g5254	27.9463301202745	0	0	1.79259204901719	6.81376064438879	9.0196627423514
g5255	0	0	0	0	0	0
g5256	468.877316462383	474.06395402545	801.578025420439	141.017241189353	157.335927606796	192.795291117761
g5257	434.720690759826	275.996137617557	262.865668255286	244.390049349344	427.408622238933	465.640089073891
g5258	58.9978080316906	84.422347977135	74.6408687638465	46.607393274447	52.6517867975497	56.3728921396962
g5259	102.469877107673	295.478217919973	162.262758182275	197.185125391891	197.599058687275	209.70715875967
g5260	40.366921284841	9.74104015120789	25.962041309164	42.4246784934069	47.076891724868	45.662042633154
g5261	18.6308867468497	0	6.490510327291	9.5604909280917	9.91092457365642	14.0932230349241
g5262	217.360345379913	626.673583061041	545.202867492444	687.757816139597	457.760828745756	507.919758178663
g5263	108.680172689956	240.278990396461	175.243778836857	95.604909280917	142.469540746311	115.00069996498
g5264	1304.16207227948	1139.70169769132	1197.49915538519	590.957845492668	732.169552878868	670.273687540988
g5265	565.136897987773	662.390730282136	447.845212583079	1183.11075235135	818.890142898362	674.783518912164
g5266	80.7338425696819	25.9761070698877	19.471530981873	104.567869526003	92.2954850921754	71.0298440960173
g5267	425.405247386401	178.585736105478	473.807253892243	121.298728650163	196.360193115568	378.262106257362
g5268	676.922218468871	704.601904270704	707.465625674719	749.303476489187	583.505684274022	718.19064585973
g5269	701.763400798004	964.362974969581	801.578025420439	1073.16510667829	898.796972273467	1016.40324527872
g5270	52.7875124494074	64.9402676747192	100.602910073011	50.1925773724814	30.3522065068228	38.3335666549934
g5271	335.355961443294	532.510194932698	356.978068001005	515.668979433946	736.505582379843	581.204517960268
g5272	5107.96811642795	5127.03413291908	4520.64044295818	524.034408996026	388.384356730161	558.65536110439
g5273	251.516971082471	418.864726501939	81.1313790911375	305.935709698934	102.825842451685	65.3925548820476
g5274	9.31544337342484	81.175334593399	55.1693377819735	157.150569630507	96.6315145931501	136.986127899462
g5275	0	3.24701338373596	6.490510327291	4.18271478104012	0	0
g5276	7356.09511721448	7208.36971189383	9485.8808433358	3322.86812819487	2975.75510324034	2365.40655418165
g5277	117.995616063381	9.74104015120789	25.962041309164	130.859219578255	148.044435818993	140.368501427844
g5278	43.4720690759826	48.7052007560394	35.6978068001005	28.0839421012694	65.0404425146203	42.8433980261691
g5279	90.0492859431068	12.9880535349438	77.886123927492	33.461718248321	35.307668793651	29.877632834039
g5280	0	0	0	10.7555522941032	10.5303573595099	4.5098313711757
g5281	9.31544337342484	3.24701338373596	0	1.79259204901719	1.23886557170705	0.563728921396962
g5282	425.405247386401	457.828887106771	412.147405782979	226.464128859172	247.773114341411	213.089532288052
g5283	534.085420076357	597.450462607417	389.43061963746	639.955361499138	627.485412069622	586.841807174238
g5284	0	0	0	4.18271478104012	7.43319343024232	4.5098313711757
g5285	0	0	0	0.597530683005731	4.95546228682821	7.32847597816051
g5286	347.776552607861	360.418485594692	308.299240546322	410.503579224937	485.015871323311	453.238052803158
g5287	14131.5275974855	14169.9664066237	14217.4628719309	4629.66773192841	5402.69275821446	5632.77938259845
g5288	481.29790762695	211.055869942838	275.846688909868	399.150496247829	542.623120407689	512.993318471236
g5289	1089.90687469071	996.83310880694	983.312314584586	2362.63632060466	2166.77588491563	2376.1174036882
g5290	10383.6142135775	13566.0219172488	11851.6718576334	9592.75758497401	10101.7098716993	10056.9239577218
g5291	10777.9679830525	13046.4997758511	10196.5917241742	11878.9099781539	14185.0107960458	13526.6754689201
g5292	90.0492859431068	64.9402676747192	45.433572291037	184.636981048771	238.481622553608	200.687496017319
g5293	24.8411823291329	6.49402676747192	9.7357654909365	67.5209671796476	57.6072490843779	103.162392615644
g5294	829.07446023481	1013.06817572562	739.918177311174	1149.64903410303	934.724073852971	934.098822754767
g5295	503.033942164941	866.952573457502	561.429143310672	495.950466894757	449.088769743807	434.071269475661
g5296	86.9441381519651	113.645468430759	42.1883171273915	152.370324166462	143.708406318018	162.917658283722
g5297	16913.7400183484	29378.977096043	15943.9386189903	10178.9351850026	6325.64760913621	6870.16436506478
g889	62.1029558228322	103.904428279551	181.734289164148	327.446814287141	272.550425775552	343.31091313075
g890	0	3.24701338373596	0	0	3.71659671512116	5.63728921396962
g891	18.6308867468497	42.2111739885675	25.962041309164	8.96296024508597	9.91092457365642	7.32847597816051
g892	152.152241765939	133.127548733174	197.960564982376	105.165400209009	107.16187195266	86.8142538951322
g893	530.980272285216	464.322913874242	584.14592945619	528.217123777066	655.359887433031	730.028953209066
g894	552.716306823207	603.944489374889	811.313790911375	483.999853234642	511.032048329159	456.620426331539
g895	2692.16313491978	2545.65849284899	5043.12652430511	252.157948228419	221.756937335562	258.187845999809
g896	39019.2871434855	39853.8422719752	63529.1150835243	3543.95448090699	1702.20129552549	1533.34266619974
g897	0	16.2350669186798	6.490510327291	16.1333284411547	11.769222931217	16.3481387205119
g898	58.9978080316906	87.669361360871	55.1693377819735	242.597457300327	168.485717752159	195.050206803349
g899	27.9463301202745	29.2231204536237	0	17.9259204901719	14.8663868604846	30.441361755436
g900	726.604583127137	1032.55025602804	713.95613600201	1061.21449301818	1027.01955894515	975.814762938142
g901	2083.55416785602	3032.71050040939	2378.77203495215	2985.26329229663	2796.73902812867	2969.1602289978
g902	52.7875124494074	25.9761070698877	0	108.153053624037	47.076891724868	42.8433980261691
g903	24.8411823291329	55.1992275235113	29.2072964728095	55.570353519533	110.878468667781	125.711549471523
g904	444.036134133251	435.099793420619	629.579501747227	481.609730502619	644.210097287667	457.747884174333
g905	819.759016861386	912.410760829805	879.464149347931	870.602205139351	806.501487181291	710.862169881569
g906	0	0	0	0	0	1.12745784279392
g907	24.8411823291329	32.4701338373596	25.962041309164	16.1333284411547	10.5303573595099	18.6030544060998
g908	0	0	0	0	0	0
g909	0	0	0	19.7185125391891	9.29149178780289	14.0932230349241
g910	0	0	0	0	0	0
g911	0	0	0	0	0	0
g912	937.754632924767	1568.30746434447	1064.44369367572	2971.5200865875	1882.45623620887	1869.32510335233
g913	1245.16426424779	1386.47471485526	1466.85533396777	1010.42438496269	937.821237782239	982.015781073508
g914	2341.28143452078	2402.78990396461	3151.14276389978	967.402175786279	1086.48510638709	1041.77104674159
g915	602.398671481473	779.283212096631	697.729860183783	468.464055476493	582.266818702315	742.994718401196
g916	406.774360639551	155.856642419326	337.506537019132	8.96296024508597	29.1133409351157	32.6962774410238
g917	822.864164652527	1600.77759818183	545.202867492444	1976.63149938296	1806.88543633474	1568.85758824775
g918	574.452341361198	886.434653759918	639.315267238164	923.184905243855	909.94676241883	854.613044837795
g919	12.4205911645664	45.4581873723035	9.7357654909365	112.335768405077	148.663868604846	124.020362707332
g920	111.785320481098	45.4581873723035	129.81020654582	75.2888660587221	97.2509473790036	152.770537698577
g921	294.989040158453	500.040061095338	347.242302510068	611.871419397869	640.493500572546	739.048615951418
g922	6.21029558228322	0	6.490510327291	5.37777614705158	4.33602950097468	8.45593382095444
g923	0	0	0	0	0	0
g924	0	0	0	0	0	0
g925	0	0	16.2262758182275	0	0	0
g926	0	0	0	0	0	0
g927	4458.99222807936	3247.01338373596	8142.34520558656	45.4123319084356	68.1376064438879	146.56951956321
g928	586.872932525765	633.167609828512	629.579501747227	565.861556806428	512.89034668672	642.650970392537
g929	1521.52241765939	1061.77337648166	1862.77646393252	299.362872185871	331.396540431637	330.34514793862
g930	829.07446023481	1068.26740324913	1632.36334731369	281.436951695699	281.841917563354	314.560738139505
g931	1052.64510119701	1113.72559062143	1502.55314076787	2457.04616851957	1684.23774473574	1832.11899454013
g932	180.098571886214	178.585736105478	233.658371782476	167.308591241605	159.81365875021	227.182755322976
g933	735.920026500562	827.98841285267	694.484605020137	161.930815094553	161.67195710777	171.937321026074
g934	3819.33178310418	3500.28042766737	2855.82454400804	959.036746224199	834.995395330553	825.86286984655
g935	2263.65273974224	1987.17219084641	1658.32538862285	2894.43862847976	2656.12778573992	2735.21272661806
g936	80.7338425696819	90.9163747446069	107.093420400301	75.2888660587221	62.5627113712062	73.2847597816051
g937	149.047093974797	194.820803024158	262.865668255286	100.385154744963	109.639603096074	112.182055357996
g938	65.2081036139738	35.7171472210956	0	48.3999853234642	54.5100851551103	49.0444161615357
g939	161.467685139364	100.657414895815	123.319696218529	89.6296024508597	112.736767025342	86.8142538951322
g940	0	16.2350669186798	12.981020654582	7.76789887907451	21.6801475048734	9.0196627423514
g941	0	0	0	0	0.619432785853526	0
g942	9.31544337342484	74.6813078259271	51.924082618328	88.4345410848482	102.206409665832	136.986127899462
g943	4629.77535659214	4312.03377360136	4773.77034572253	3646.13222770097	5790.45768215876	9567.04352502785
g944	0	0	6.490510327291	1.19506136601146	0.619432785853526	1.69118676419089
g5298	270.14785782932	113.645468430759	194.71530981873	144.602425287387	135.655780101922	264.388864135175
g5299	1422.15768834286	1717.67007999632	1405.1954858585	928.562681390907	984.898129507107	1297.70397705581
g5300	9.31544337342484	25.9761070698877	16.2262758182275	1.19506136601146	1.85829835756058	6.20101813536659
g5301	0	6.49402676747192	9.7357654909365	1.19506136601146	0	0
g5302	0	0	0	0	0	1.12745784279392
g5303	6.21029558228322	3.24701338373596	3.2452551636455	2.39012273202293	3.71659671512116	2.25491568558785
g5304	0	0	0	0	0	0
g5305	0	9.74104015120789	6.490510327291	17.9259204901719	6.81376064438879	3.38237352838177
g5306	0	0	0	0	0	0
g5307	130.416207227948	116.892481814495	81.1313790911375	119.506136601146	109.639603096074	103.162392615644
g5308	170.783128512789	113.645468430759	129.81020654582	93.8123172318998	86.1011572336402	69.3386573318264
g5309	0	0	0	0	0	1.12745784279392
g5310	99.3647293165316	77.9283212096631	45.433572291037	172.088836705651	154.238763677528	144.878332799019
g5311	18.6308867468497	25.9761070698877	12.981020654582	16.7308591241605	31.5910720785298	14.656951956321
g5312	161.467685139364	155.856642419326	126.564951382174	44.8148012254299	19.8218491473128	45.098313711757
g5313	0	0	0	0	0	2.25491568558785
g5314	0	0	0	0	0	0
g5315	0	6.49402676747192	0	1.19506136601146	0	0
g5316	0	0	0	0	0	0
g5317	1502.89153091254	1389.72172823899	1158.55609342144	986.523157642462	1104.44865717684	1043.46223350578
g5318	17112.4694769814	14994.7078060927	13928.6351623665	712.256574142832	554.392343338906	553.01807189042
g5319	307.40963132302	438.346806804355	415.392660946624	140.419710506347	147.425003033139	192.795291117761
g5320	58.9978080316906	9.74104015120789	84.376634254783	42.4246784934069	50.1740556541356	41.1522112619783
g5321	1006.06788432988	2175.49896710309	687.994094692846	365.688777999508	345.024061720414	356.840407244277
g5322	2040.08209878004	2743.72630925689	1963.37937400553	1151.44162615204	1155.86157840268	1019.7856188071
g5323	152.152241765939	425.358753269411	311.544495709968	445.757889522276	458.380261531609	376.570919493171
g5324	18.6308867468497	19.4820803024158	22.7167861455185	77.6789887907451	68.7570392297414	65.9562838034446
g5325	611.714114854898	522.76915478149	749.65394280211	616.054134178909	641.732366144253	607.136048344528
g5326	214.255197588771	97.4104015120788	220.677351127894	52.5827001045044	112.117334239488	75.539675467193
g5327	1977.97914295721	1418.94484869262	2239.2260629154	543.752921535215	642.351798930107	539.488577776893
g5328	7946.07319753139	6630.40132958883	12497.4776351988	846.103447136116	654.740454647177	792.602863484129
g5329	1661.25406826076	2889.84191152501	1421.42176167673	4057.23333760892	4011.44672118744	3795.02309884435
g5330	158.362537348222	94.1633881283429	113.583930727593	157.748100313513	226.092966836537	245.222080807679
g5331	2207.76007950169	2052.11245852113	3105.70919160874	509.693672603889	260.781202844335	357.404136165674
g5332	15923.1978729742	11140.5029195981	25348.688083235	331.629529068181	263.878366773602	359.095322929865
g5333	0	0	0	0	0	0
g5334	804.233277905677	1129.96065754011	733.427666983883	2433.14494119934	1939.44405250739	2203.05262481933
g5335	1863.08867468497	2529.42342593031	2440.43188306142	2581.93008126777	2399.68261239656	2007.43868909458
g5336	0	0	0	0	0	1.12745784279392
g5337	254.622118873612	185.07976287295	139.545972036756	421.259131519041	439.17784517015	385.590582235522
g5338	5614.10720638403	8020.12305782783	5357.91627517872	8021.25188866894	9169.46352898975	10342.1707919487
g5339	1369.37017589345	1000.08012219068	1142.32981760322	3494.95696490052	4629.0212086834	3826.02818952118
g5340	27.9463301202745	9.74104015120789	0	25.0962886862407	13.0080885029241	18.6030544060998
g5341	0	0	0	0	0	0
g5342	31.0514779114161	9.74104015120789	6.490510327291	48.3999853234642	42.7408622238933	45.098313711757
g5343	3.10514779114161	12.9880535349438	6.490510327291	19.1209818561834	19.8218491473128	15.7844097991149
g5344	12.4205911645664	0	22.7167861455185	23.3036966372235	23.538445862434	28.7501749912451
g5345	18.6308867468497	74.6813078259271	29.2072964728095	46.607393274447	38.4048327229186	63.1376391964598
g5346	18.6308867468497	38.9641606048315	9.7357654909365	39.4370250783783	56.3683835126709	45.098313711757
g5347	627.239853810606	1308.54639364559	756.144453129402	1835.0167275106	1712.11222009915	1668.63760733501
g5348	518.559681120649	607.191502758625	626.334246583581	599.920805737754	657.837618576445	447.037034667791
g5349	381.933178310418	519.522141397754	314.789750873614	764.839274247336	736.505582379843	763.288959571487
g5350	22434.6927909981	30914.8144265501	20334.7688554027	22641.0351097702	17775.8626556386	17551.6999676944
g5351	0	0	0	2.39012273202293	0.619432785853526	1.69118676419089
g5352	490.613351000375	357.171472210956	246.639392437058	284.424605110728	207.509983260931	268.334966584954
g5353	3.10514779114161	12.9880535349438	9.7357654909365	4.18271478104012	4.33602950097468	9.0196627423514
g5354	3511.92215178116	3854.20488649459	3115.44495709968	1247.64406611597	1297.71168636314	1507.97486473687
g5355	21.7360345379913	29.2231204536237	6.490510327291	6.57283751306305	1.85829835756058	14.656951956321
g5356	111.785320481098	207.808856559102	126.564951382174	257.53572437547	262.020068416042	221.545466109006
g5357	12.4205911645664	9.74104015120789	35.6978068001005	63.9357830816133	69.3764720155949	63.7013681178567
g5358	267.042710038179	357.171472210956	272.601433746222	356.725817754422	347.501792863828	375.443461650377
g5359	130.416207227948	288.984191152501	240.148882109767	380.627045074651	333.254838789197	386.718040078316
g5360	853.915642563943	772.789185329159	418.637916110269	883.150349482471	766.857788886666	631.940120885995
g5361	186.308867468497	84.422347977135	97.357654909365	268.888807352579	214.32374390532	185.466815139601
g5362	307.40963132302	353.92445882722	282.337199237159	408.71098717592	357.412717437485	366.987527829423
g5363	46.5772168671242	32.4701338373596	42.1883171273915	87.8370104018425	102.206409665832	66.5200127248415
g5364	1925.1916305078	2240.43923477781	1830.32391229606	1325.92058558972	1372.04362066556	1369.29755007322
g5365	15.5257389557081	152.60962903559	71.395613600201	375.249268927599	239.101055339461	234.511231301136
g5366	232.886084335621	237.031977012725	165.508013345921	303.545586966912	294.850006066279	261.570219528191
g5367	0	0	0	0	0	0
g5368	0	0	0	0	0	0
g5369	279.463301202745	340.936405292276	314.789750873614	282.034482378705	291.133409351157	242.967165122091
g5370	180.098571886214	100.657414895815	136.300716873111	69.9110899116706	75.5707998741302	65.9562838034446
g5371	13268.2965115481	8659.78469442381	13821.5417419662	1863.10066961187	2252.87704214927	2699.13407564866
g5372	25850.3553612539	28599.6938839464	25098.8034356343	15479.0323432635	19084.7241321471	20325.8099898889
g5373	14016.6371292132	17689.7289145935	11562.8441480689	13895.5760332983	17179.9683156476	17615.4013358123
g5374	1484.26064416569	1003.32713557441	1742.70202287763	1238.08357518788	1382.57397802507	1168.04632513451
g5375	4757.08641602895	3805.49968573855	5718.13959834337	2596.2708176599	3110.79145055641	3071.75889269205
g5376	4567.67240076931	4480.87846955563	4744.56304924972	2580.73501990175	2641.26139887944	2577.93235754831
g5377	1499.7863831214	1522.84927697217	1285.12104480362	1566.12792015802	1698.48469881037	1770.67254210786
g5378	8039.22763126563	9458.54998682286	9395.01369875372	7292.86198608495	7351.42830250965	7223.62239878068
g5379	434.720690759826	311.713284838652	285.582454400804	632.78499330307	560.586671197441	527.08654150616
g5380	170.783128512789	87.669361360871	139.545972036756	151.17526280045	131.319750600948	140.368501427844
g5381	108.680172689956	81.175334593399	155.772247854984	72.8987433266992	94.153783449736	72.1573019388112
g5382	1248.26941203893	1142.94871107506	1119.6130314577	424.844315617075	273.169858561405	413.77702830537
g5383	0	0	0	0	0	0
g5384	0	0	0	0	0	1.69118676419089
g5385	1676.77980721647	2276.15638199891	2352.80999364299	1234.49839108984	1022.06409665832	1140.42360798605
g5386	329.145665861011	237.031977012725	201.205820146021	338.79989726425	361.748746938459	310.614635689726
g5387	127.311059436806	58.4462409072473	133.055461709466	108.750584307043	257.064606129213	234.511231301136
g5388	1431.47313171628	1334.52250071548	1771.90931935044	844.310855087098	937.821237782239	949.319503632485
g5389	220.465493171054	38.9641606048315	227.167861455185	12.5481443431204	5.57489507268174	25.9315303842603
g5390	1505.99667870368	1613.76565171677	1625.8728369864	799.496053861669	729.691821735454	637.577410099964
g5391	37.2617734936993	42.2111739885675	16.2262758182275	79.4715808397623	73.7125015165696	60.318994589475
g5392	208.044902006488	175.338722721742	233.658371782476	509.096141920883	332.635406003344	450.98313711757
g5393	1564.99448673537	3094.40375470037	2135.37789767874	2945.22873653525	1487.25811883432	2387.39198211614
g5394	894.282563848784	720.836971189383	626.334246583581	660.271404721333	678.278900509611	912.677123741682
g5395	24.8411823291329	110.398455047023	81.1313790911375	207.940677685995	175.918911182401	188.285459746585
g5396	198.729458633063	412.370699734467	188.224799491439	335.812243849221	325.202212573101	283.555647462672
g5397	294.989040158453	123.386508581967	90.867144582074	32.2666568823095	33.4493704360904	31.5688195982299
g5398	254.622118873612	363.665498978428	321.280261200905	287.412258525757	353.07668793651	323.016671960459
g5399	15.5257389557081	6.49402676747192	6.490510327291	8.96296024508597	25.3967442199946	9.58339166374836
g5400	20512.6063082815	18121.5816946304	24332.923217014	2586.11279604881	1573.35927606796	2444.32860317723
g5401	52.7875124494074	35.7171472210956	81.1313790911375	14.9382670751433	26.6356097917016	40.5884823405813
g5402	589.978080316906	769.542171945423	610.107970765354	682.380039992545	538.906523692568	457.747884174333
g5403	7185.31198870169	6289.46492429656	7850.27224085847	714.646696874855	773.671549531054	638.704867942758
g5404	40.366921284841	12.9880535349438	25.962041309164	32.2666568823095	34.0688032219439	44.53458479036
g5405	481.29790762695	493.546034327866	567.919653637962	934.537988220964	929.768611566143	873.779828165292
g5406	0	0	3.2452551636455	6.57283751306305	5.57489507268174	1.12745784279392
g5407	832.179608025952	795.518279015311	850.256852875121	265.90115393755	180.254940683376	210.270887681067
g5408	18.6308867468497	6.49402676747192	16.2262758182275	19.7185125391891	7.43319343024232	11.8383073493362
g5409	0	6.49402676747192	0	3.58518409803439	3.09716392926763	2.25491568558785
g5410	90.0492859431068	58.4462409072473	58.414592945619	87.8370104018425	62.5627113712062	87.9417117379261
g5411	0	0	0	0	3.09716392926763	0
g5412	0	0	0	0	0	1.12745784279392
g5413	0	0	0	0	0	1.69118676419089
g5414	316.725074696444	438.346806804355	324.52551636455	80.6666422057737	74.9513670882767	148.260706327401
g5415	251.516971082471	282.490164385029	305.053985382677	350.750510924364	311.574691284324	385.026853314125
g5416	68.3132514051155	12.9880535349438	12.981020654582	40.6320864443897	50.7934884399892	29.877632834039
g5417	71.4183991962571	61.6932542909833	45.433572291037	74.6913353757164	91.0566195204684	112.182055357996
g5418	0	0	0	1.19506136601146	1.85829835756058	0
g5419	34.1566257025577	9.74104015120789	42.1883171273915	1.79259204901719	5.57489507268174	1.12745784279392
g5420	40.366921284841	103.904428279551	68.1503584365555	180.454266267731	135.036347316069	127.96646515711
g5421	12.4205911645664	0	0	44.2172705424241	10.5303573595099	31.0050906768329
g5422	9.31544337342484	0	0	9.5604909280917	6.19432785853526	2.25491568558785
g5423	12.4205911645664	9.74104015120789	3.2452551636455	5.97530683005731	9.29149178780289	3.94610244977874
g5424	49.6823646582658	201.31482979163	68.1503584365555	92.6172558658884	145.566704675579	114.436971043583
g5425	12.4205911645664	35.7171472210956	29.2072964728095	71.106151277682	53.8906523692568	36.6423798908026
g5426	0	0	0	0	0	0
g5427	0	0	0	2.39012273202293	0	0.563728921396962
g5428	294.989040158453	152.60962903559	684.7488395292	16.1333284411547	37.7853999370651	40.5884823405813
g5429	0	0	3.2452551636455	2.39012273202293	6.81376064438879	0
g5430	34.1566257025577	58.4462409072473	12.981020654582	129.066627529238	112.117334239488	127.96646515711
g5431	24.8411823291329	42.2111739885675	42.1883171273915	67.5209671796476	66.8987408721808	68.2111994890324
g5432	0	0	0	0	0	0
g5433	0	0	0	0	0	0
g5434	0	0	0	0	0	0
g5435	58.9978080316906	32.4701338373596	25.962041309164	88.4345410848482	94.7732162355895	78.3583200741778
g5436	102.469877107673	149.362615651854	29.2072964728095	149.980201434439	96.6315145931501	194.486477881952
g5437	1462.5246096277	1068.26740324913	1814.09763647783	2080.00430754295	1396.20149931385	5396.57696453312
g5438	0	0	0	0	0.619432785853526	0
g5439	4617.35476542758	5260.16168165226	5925.83592881668	270.681399401596	326.441078144808	426.7427934975
g5440	270.14785782932	321.45432498986	1019.01012138469	12.5481443431204	30.9716392926763	24.2403436200694
g5441	111.785320481098	185.07976287295	61.6598481092645	197.185125391891	155.477629249235	121.765447021744
g5442	43.4720690759826	217.549896710309	61.6598481092645	96.2024399639227	115.214498168756	87.3779828165292
g5443	180.098571886214	198.067816407894	171.998523673212	331.031998385175	232.287294695072	188.849188667982
g5444	8290.7446023481	8133.76852625858	7882.72479249492	4082.32962629516	3092.2084669808	3030.04295250867
g5445	0	0	0	0	0	0
g5446	49.6823646582658	38.9641606048315	29.2072964728095	35.8518409803439	20.4412819331664	21.4216990130846
g5447	130.416207227948	288.984191152501	116.829185891238	249.767825496396	278.125320848233	353.458033715895
g5448	3.10514779114161	87.669361360871	0	20.9135739052006	3.09716392926763	3.94610244977874
g5449	40.366921284841	48.7052007560394	29.2072964728095	75.8863967417279	60.0849802277921	68.7749284104294
[truncated: 8,949 more rows]
