# Supplementary material for: A Genomic and Transcriptomic Study on the DDT-Resistant Trichoderma hamatum FBL 587: First Genetic Data into Mycoremediation Strategies for DDT-Polluted Sites
Source: Microorganisms. 2021 Aug 7;9(8):1680. doi: 10.3390/microorganisms9081680 (PMC8401308; doi:10.3390/microorganisms9081680)
Supplement: Supplementary file 1 [file microorganisms-09-01680-s001.zip › Table S3_RPKM.xlsx]

## Sheet: FPKM
Locus	X10_Control	X11_Control	X12_Control	X7_Treatment	X8_Treatment	X9_Treatment
g10777	0	0	0	0.0566815014625925	0.119201420915983	0.0242087108044186
g10778	1.87229524793426	2.2967184024642	3.17081638399623	2.74638859054971	1.83354477061129	3.5003349349477
g10779	0.870324966098896	1.78295377678683	2.62910151661883	10.9584058420336	10.4952758123236	9.83766397571469
g10780	0.684539725462913	0	0	0.247045789393563	0.346358845680402	0.703422917713296
g10781	0	0.405205216232412	0	0	0	0
g10782	0.729492786730842	1.09646706151134	0.80283695569138	5.49431055214071	3.75523094056268	2.60084166918659
g10783	17.3297001656374	25.9045106764549	19.6394184054797	3.56663646880967	5.22932679008906	4.03356131298645
g3911	0	1.0153284989595	0.550686682200161	0.847955261880383	0.668719971338662	0.0905405784085257
g3912	0	0	0	0.337254933702425	0.709248454450096	0.432125487858873
g3913	0.654745533590323	1.32035818601421	1.07418978613885	7.3250912351928	12.0504474665327	7.77091907041327
g3914	3.61846725975773	3.69988322625301	1.72004268609867	20.1951665307778	18.1795464031086	13.1030217339855
g3915	0.0541168985383947	0.187083429658239	0.126836232409882	0.488260630524701	0.349116770155746	0.216877931960406
g3916	0.154540288810344	0.148402645383707	0.0482937456201595	1.31995040451814	0.566901170056579	0.412888631178945
g3917	4.18020531057482	1.09477811039995	2.49386759961256	6.72016300427383	2.88418964841074	5.50607214351293
g3918	2.61454129988166	4.51926631584347	1.92005000470383	7.95744366675582	10.6161775865337	7.87192565985105
g3919	4.71748779673824	5.15104343850602	2.8607961065838	19.5252856354036	20.1553115024249	19.5565905962318
g3920	10.520602006688	10.3553404122735	3.28768168477708	14.5544559874991	20.6271831955209	12.9729783988335
g3921	226.888640027088	179.983411614116	158.768120785406	123.73131366251	79.196009075683	104.916337872383
g3922	1.33500063342443	3.90222335150732	2.04523324320459	17.1800248457472	17.4717302193804	13.872181747293
g3923	0	0	0.201892812957461	0	0	0
g3924	3.78796783775847	6.24798727081292	5.22237189586497	26.4832848228176	24.8031973955091	23.4921399613451
g3925	1.51354673041002	4.65099353306601	2.42403493545163	14.0198738083904	13.6410669000064	13.6866248588103
g3926	0.425787998743938	0.377425494807312	0.168881928187878	3.98344444554689	3.28127690253796	4.32148435418103
g3927	11.5663579469641	18.1831060047143	9.11997877190655	83.1526918505651	88.5397865678276	78.1131756195164
g3928	49.173593043179	67.2004278958772	42.046119575439	201.898963195317	224.956219525043	205.370408140108
g3929	1.04892906911919	1.3337648590601	1.08509691073923	10.312263806735	10.5688501217317	10.615102296172
g3930	28.0045238910354	27.0533422778768	27.3546647194044	70.5649556226314	123.835011549419	99.3583150006774
g3931	0	0	0	0	0.0839799031103451	0.375221988022415
g3932	21.0476151053972	33.3493029213388	19.02738262081	77.5871313658376	65.3234682544714	59.3231138969207
g3933	8.04680095141272	4.96283316286709	6.69384859013978	23.1504875108192	23.4826142085296	19.2860416191038
g10784	4.42578195370031	3.84906552543542	3.52287377930647	19.3476388448946	17.9991240593184	11.8416191094822
g10785	0	0.2921208176209	0.118828815517914	1.92123032516055	0.480994636186871	1.79741468850464
g10786	0	0	0	0	0	0
g10787	0	0	0	0	0	0
g10788	19.7028417030173	20.7438532978378	17.9054025338974	33.2753399616701	34.2809730813493	27.6794101424035
g10789	12.7117538405623	13.3795316643154	7.50692653437416	69.4278851834145	57.0506473438388	43.2602354674426
g10790	5.61092638512743	19.8944702385346	7.7554719938966	99.5857885409904	64.7505621886351	42.976679030443
g10791	0	0	0	0	0	0
g10792	0	0	0	0	0	0
g10793	0	0.189588654841989	0	0.926263550309477	0.349629519799343	0.38546405020275
g10794	0	0	0	0	0	0
g3934	3.58079609152159	1.10705599575023	4.01201214941919	13.490197348097	17.4992142032547	21.1620332372009
g3935	2.1166879103345	2.62677383574527	0.814109139472255	9.79356988048225	10.6686845128211	7.02717266423088
g3936	111.480515121358	107.857626496493	83.5335861866249	261.751398743717	369.457813190883	389.594488881537
g3937	0	0	0.804761330981447	0.154897881867502	0	0.330784994185637
g3938	85.7873351888574	19.3521682337234	114.119930031386	78.5968938106089	287.633090689736	266.901565633208
g3939	0.095268812579871	0.384237692686249	0.401914515507532	2.75054996902812	2.85605610248903	2.37889286179954
g3940	0	0	0	0	0	0
g3941	0	0	0	0.294979759599408	0.23719019875202	0.0741094537955659
g3942	1.66875079178053	2.07680829332625	1.1889826092958	12.1411776132873	11.4999570828694	10.9060242173906
g3943	0.213267736044981	0.122878621934933	0	0	0.323723360952326	0.328726166420996
g3944	3.79317523150114	0.874206579669926	0.889023702813913	4.38058068868095	4.46224581120817	4.09270142252561
g3945	0.443751559566936	0.255676649137222	0.145605695164083	3.50721836947611	3.83940238238904	5.11623644017959
g3946	0	0	0	0	0	0
g3947	11.6334550082746	9.84600313355866	8.31839697377162	31.3103685253147	27.7350610448644	21.5178599708753
g3948	7.16882273258541	7.53628820597997	4.51980810737286	34.9798836619905	38.5313974785062	35.2561762905629
g3949	156.179368220853	114.672395176602	162.290604577812	42.6471617004546	62.1516208655933	55.8156036306676
g3950	31.5715749475081	24.5741311471559	23.5849198981187	44.9144860653619	55.9524611351028	51.3601336190989
g3951	214.338612336611	190.448450791571	218.326128421771	506.606203926616	523.675991122931	511.483075138931
g3952	5.0008402106115	3.58566460893805	2.8129671063738	30.159706071205	28.1705818556719	26.5161542603996
g3953	0.545331823733054	0.628408443211008	0.127811895736112	3.44411537070116	6.20827559598227	1.93329351774173
g3954	1933.63975467302	2007.43824542341	2433.26673530304	185.120465602374	226.794563922996	1089.01365471836
g3955	12.9095937541455	18.8728665067448	17.1154143378283	9.28320281428325	10.6752860154344	21.6508234123105
g3956	136.228940050677	173.046156336813	142.058342301855	97.4283767681471	89.371561035393	284.538990844169
g3957	47.746725300867	70.8172773270324	56.5067427731154	84.0647847976644	102.492822440955	89.5286172083468
g3958	49.732377808433	63.1930516451035	55.7823010695196	94.3876766936506	94.699221283164	99.1057562363733
g3959	223.104065199025	346.535318925287	265.69432953394	94.1636669684932	100.674831438546	107.184969347324
g3960	0.919180763997145	2.03015261217684	0.789919421188756	7.35326330859386	6.62740359076319	7.17847804967745
g3961	0.327025605854764	1.25615049358722	0.715367111023539	6.92391889340292	5.37765265039044	4.16697890024392
g3962	3.69419706530415	5.92274957726375	3.91503813126677	32.3448559853982	26.3308488714598	22.0834129524545
g3963	7.75892569976489	6.91563753808945	6.43003632260405	34.46807304078	27.751785855318	30.65844439855
g3964	22.59581567471	16.8697511179029	23.5704129455642	70.7504467729917	57.8487632584761	51.3109996213023
g3965	22.255627064593	26.9111340015479	23.5779443543953	46.8948073833605	55.1423458566638	43.072702349687
g3966	30.3959953677997	28.5897015585632	21.9672298598194	128.180675437387	140.122868612071	136.373152079969
g10795	0	0	0	0	0	0
g10796	0	0.40222407995	0.490849759176714	0.503878338978156	2.11931626457075	1.5064476543354
g10797	1.63074298337851	1.54360612211973	2.02022451402042	2.77447118263978	3.66880361990333	3.77038669293294
g10798	69.1285480836106	82.2460421646232	84.1660867991513	281.88032450063	304.233518256039	211.16909575543
g10799	0	0	0	0	0	0
g10800	21.0194354843943	57.3243727341788	34.8133718031602	88.5729315659378	93.1346120420058	138.852396293503
g10801	0	0.852194183778957	0	0.533784787154917	0	0
g10802	1.84938618483384	1.95353059519944	1.0113810879988	3.78210930149046	3.39205782563089	3.70578379393216
g10803	1.35511363731783	3.34618620184393	0.725952311751625	8.94265436258031	17.1902591502311	13.6066631958575
g10804	3.19239281905841	1.47149057820217	0.299286240326175	10.8298633990158	9.93388363220476	3.73971954296084
g10805	6.4399366104062	9.78223470758322	4.25364297712749	38.7002837544245	36.9536285379836	35.7951123940683
g10806	10.2232302156307	5.29588922054605	8.17739575986097	25.2510400179024	29.8971520032796	24.6921340203543
g10807	7.36756322268702	5.86210709012453	5.9203517028345	26.7156553284413	20.7691185637605	23.2531690281282
g3967	2.04197839550427	2.99479888331169	1.08769942872492	10.6185819758046	13.2083515783596	9.327927761998
g3968	7.13577280322153	3.50764780789406	4.16356557051821	24.293815345681	22.5909404557005	16.0138154092943
g3969	13.7126793398192	24.9136106852769	18.6734797542557	84.9606586635749	82.0435407874113	64.7360727608378
g3970	2.64097951394832	2.92625967256114	2.66636832290592	22.5081010101401	25.8258948087807	21.7941550398388
g3971	0	0	0	1.34338316210158	1.84720697746752	1.41233214230569
g3972	0	1.13664830817947	0.990783098543813	4.72942833690995	5.34731528372245	4.77835814767408
g3973	18.8301839344515	23.5294687751296	13.7546514485904	99.0854995217725	111.529319462278	90.9192026455068
g3974	364.220897047693	210.711302509227	310.424690464754	83.6617698490339	157.208179705883	139.679648874033
g3975	1.89934860556073	0.331620916980053	0.917297244986271	4.90209298931409	8.34339867189055	5.64231040138237
g3976	0	0	0	0.18783819092287	0.0987561139107729	0.160451657939159
g3977	25.0621566110538	26.2546917375447	18.2186109006898	134.510634640038	137.725508221379	97.3812909493002
g3978	10.5624270299562	14.8883796712869	17.4173608888537	14.9072868860393	16.1044947226054	16.6295631168687
g3979	27.6298830518853	27.9875594185729	25.2762799759865	25.1966475034904	25.6487609430833	32.5592817008116
g3980	365.027316053479	497.239001499362	323.282583523755	1205.40247439402	1435.75770036819	1270.23581119033
g3981	0.433368671052617	0.799021865398145	0.406282332989158	9.00863094409176	7.10444488943267	8.22957365298404
g3982	1.21008358049307	0.893865013169899	0.465415849731498	2.17235746610617	1.88390775706636	1.14781294692366
g3983	1.80644018765464	0.991255159374686	2.2580458098584	9.99629267928025	9.79297029157036	8.37973888868865
g3984	1.04714820482527	2.81556855965	1.79978245031462	24.060190686207	27.5511114394197	23.4575420460798
g3985	0.0252257788401671	0.0290687095816626	0.0945964852859173	0.418775451419453	0.402052498105453	0.824308088087436
g3986	7.05917601127304	4.4159153159455	4.31743401103626	35.1327441727418	39.1617402007517	28.8912676295093
g3987	20.3434500194309	25.6160859829232	20.8402070098685	137.306517176044	105.522784468119	102.418837777718
g3988	59.6642590784301	92.1132521666754	55.935133279422	358.83924945938	340.439258136046	298.454670281195
g3989	6.26081244483116	9.98943707982017	7.02333353144401	71.9172884132543	64.2495658737146	56.6809472119172
g3990	0	0	0.480250013546652	0	0.518387574681133	0.736958196348465
g3991	17.5977356224129	29.508858578575	12.174271693268	40.7333880965267	35.5545329113944	38.161731395329
g10808	1271.57928174668	1308.2231885639	1315.55894665342	381.962755134026	306.913989782524	547.287882191517
g10809	2.49316349637659	3.64646895615119	9.16954969894858	18.2721702886538	23.3615325808143	18.7415618925857
g10810	0	0	0	0	0.421715297240598	0
g10811	2.83572548341188	2.91761062919397	2.56354145162144	16.5205076883592	22.5212588048538	16.6095130045985
g10812	0.217440610838034	0.125282910148361	0.458662889722503	3.45280566709622	2.97051705935736	3.65322376127473
g10813	0.545492593728259	0.349218725074514	0.113644067671024	3.06233843102438	2.7600470515157	3.43797951032374
g10814	0	0	0	0.413348665262025	0.760614637780744	0
g10815	1.18775791650261	1.2442751212739	0.404916678088354	2.18223780630981	4.83510763590454	2.79610609791035
g10816	0	0	0	0.149137860129716	0	0.0955453339989467
g10817	41.8513667208959	53.7637046497005	33.3087547320946	124.481501236684	126.094430019947	89.8055626428476
g3992	0.396892080207262	0.914710359422973	0.74417119216238	13.6790080252663	7.75654921710385	11.0116919686045
g3993	0.404704916431814	0.83944482197439	0.758820231378175	12.7944430754196	14.0676917855102	7.98468093051565
g3994	223.913994586353	209.181537469276	226.436862247486	511.960256361791	460.69195152474	488.901387739357
g3995	1.75766492663216	1.76408426460145	1.4351872991703	8.96246150346544	10.4137859114515	9.40363536366541
g3996	2.05475944245003	1.90738187385507	0.749129578784228	4.1197160141329	6.19460199250417	6.15836804833115
g3997	2.4272738789535	0.5594096413	0.910225920992002	22.1624670718737	24.9618611890878	17.434673362964
g3998	2.60240629806787	8.80915285225937	6.93804225794111	30.9346020676101	19.8129453533488	22.9646435425422
g3999	2.6442456276188	8.37945277812235	7.43692625479317	29.5830051170487	28.2217029704821	23.9452172800683
g4000	8.7556250906061	13.7093553283868	7.39381013487213	62.7386274912879	76.6984414461248	69.1269663174326
g4001	7.23731002418055	13.7219658646389	9.46739281719475	34.10650999612	38.1304510877919	30.768230943413
g4002	5.64286641312894	6.21478702302147	2.94939065885683	21.8425201657553	24.6729569216281	20.9054830787332
g4003	9.9550898100749	13.8906069912312	11.6586436353793	27.2037008713559	27.85643527472	25.5513804351536
g4004	126.06939943942	123.216512944552	134.475519379765	348.459876126501	461.063859921603	426.387447473194
g4005	58.6790379940208	54.9911035969297	73.7340751455361	31.4999531986021	26.2457930606152	25.0062465055388
g4006	2.07689818792295	2.68259527922248	2.41781286423361	15.237872781626	13.0433058352801	11.5105539957198
g4007	0	0.267795760840863	0	0.279563245721679	0.235169042922413	0.143282000495783
g4008	2.87477678773853	4.11580902826803	1.79673197158527	34.5829211677911	29.1573241740459	25.4050724670024
g4009	25.91569040552	24.5309155254143	19.9573564061285	75.5739530671388	71.7829682233257	60.311132617992
g4010	3.22841592868981	5.13590291302471	3.32126209109047	28.5607499441715	27.1044086956332	24.9779261056983
g4011	526.223164573353	457.563908830738	688.739146732574	96.2181150216132	79.7602703403401	87.650985480594
g4012	386.728525709006	266.781241828054	423.623260710456	7.05539213338762	7.76890663289657	10.7556619792456
g4013	8.47311906453096	10.3629398418875	7.55366687973673	38.3268274341067	36.572472768787	35.879708859591
g10818	0	0.247813789843672	0	7.76109680068342	5.54934983188987	3.71254254562156
g10819	0	0	0.585836895957618	0.338280024686323	0	0.288959292793167
g10820	0	0	0.477080046460536	0	0	0.784386199083762
g10821	0	0.259769718301042	0	4.3931892679658	2.22417826724482	1.38987730013088
g10822	0	0	0	0.244602479388572	0.0857333296588028	0.348232993878945
g10823	0	0	0	0	0	0
g10824	0	0	0.0377626055583966	0	0	0
g10825	6.94200329380701	13.3838756681025	7.00873959163841	8.96134538123587	8.61230266117974	9.30098669105764
g10826	0	0	0	0	0	0
g4014	50.2532381296194	38.8989489861107	39.8711461463104	46.8715530308881	132.007059277242	126.991980105465
g4015	1.7934108429984	0.657561412225952	0.917083293116843	21.5939439707643	20.1694286888029	15.5807339529342
g4016	38.1267727076147	61.5269424611342	34.3634301689547	48.1869035692579	39.4938839713203	54.5632403918398
g4017	11.9070344364305	10.4734022682251	9.31336112631184	35.8521180378658	33.1533547590792	27.5407187784124
g4018	0	0	0.242288295122635	1.67885548392408	2.6479797733712	1.67309428360192
g4019	24.4677971657324	13.9666902337833	28.9749661820866	2.89785742591767	2.06973019869004	4.25013621563971
g4020	415.311828887877	281.663878610067	589.996149546925	20.9943907282281	24.8350986140243	51.6605325999771
g4021	15.3113816724508	19.0875341826509	18.138731949247	4.77226006390026	2.74671710186496	6.73690559722205
g4022	3.0576430938347	5.87241459502071	3.00303643976009	10.7195477511082	12.7082053099061	14.0940645426303
g4023	5.81678847420643	8.79072293471429	5.98961164081344	16.1056437727281	16.2113932445736	17.4613972645014
g4024	2.24783117587527	1.49438593202618	0.891565906842145	11.2947783515816	8.72691748410842	13.3259892527267
g4025	127.462050903746	131.039462543291	94.4058608058399	26.3971248911497	25.1785391720317	33.5878143249911
g4026	65.2754045040982	34.7653390340988	42.8883251158557	38.1670364672414	50.37404977978	48.768228306065
g4027	5.8947671331333	1.20967391208843	4.54219180133676	8.91751851407984	18.7535765724982	8.96159692024685
g4028	0	0.202314246874936	0.329189306182846	0.443529118618048	1.1992416223836	0.703603128537646
g4029	0.410086630746067	0.346543858244156	0.435716191368479	2.88101821024518	3.15389206340575	3.45547154298496
g4030	0	0.322765644537534	0	0.303253755100273	0.478307881407081	0.777119405958736
g4031	7.06174670771883	4.5293872334227	7.74458911454537	29.2841322212903	32.5114343378194	22.4679115182271
g4032	7.64486840910595	4.00431747694537	3.37621367851666	1.23128107325901	1.63035600469782	1.12967040054891
g4033	128.932689258829	90.1336842687956	119.31980175281	41.5329130878319	85.1232727589536	97.3525972584271
g4034	0	0	0	0	0	0
g4035	0.566537317185013	0	0.236056752933321	0.045435447283854	0.573305547993954	0.659787436044982
g4036	1.79025084942927	3.46048289907545	4.27710302326811	16.6315944271904	21.4766807274495	16.2362655213491
g4037	14.9746960277289	10.245727645039	18.7914518451838	67.3281624854189	102.819500904234	92.3747464233266
g4038	0.163426150673578	0.0941613605288354	0.383029290083578	2.30019660665088	4.21715297240598	2.4686342125695
g4039	14.7713329393924	18.6464095116991	16.7436087892995	26.1212867657959	26.5493330663194	24.920835885926
g4040	0.26002120263157	1.29841053127199	0.487538799586989	2.00191798757595	0.986728456865648	1.81691885845102
g10827	0	0	0	0	0.237857713382654	0
g10828	0	0	0	0	0	0
g10829	5.91811294566873	4.44762171008542	4.34208522886235	6.87172756029472	5.37040444233177	5.55255111641772
g10830	0	0	0	0.0381470876167267	0.0401117377838101	0.195511788851315
g4041	4.9850441712989	3.1693643222816	4.02885323516004	15.5092151786232	17.6126079407758	10.1744596472457
g4042	33.269203367968	19.0905006189215	32.3355654211323	158.683569730687	143.873438131251	91.7605439300144
g4043	3.47020044622328	3.1102210833343	3.18101084241654	23.6559162049338	24.2304385713859	21.015195018453
g4044	8.56035850076763	13.7776280599804	10.214044105502	116.477130647317	92.4073123963852	86.8018071046637
g4045	0.645697542548246	4.46438410346514	2.78456519579855	9.50753858326937	8.13497285066505	9.3156700648973
g4046	3.50009333173874	4.52970894856211	2.82699292067134	15.352254446695	17.1646299610238	14.5083095522095
g4047	28.8210417122469	22.7449686399593	26.8559180614182	124.500653095755	125.609889830181	92.6713974585819
g4048	0.740198371007602	0.399825579023205	0.498765503117833	7.57988811390599	8.69004913249499	7.45879967492378
g4049	10.1369539622736	19.5295594689436	13.9580830850426	50.7597256148735	63.351514490712	57.4214207595519
g4050	147.965086360823	113.86222935289	240.069145705515	49.7437406252527	47.5162090566163	51.9109067482807
g4051	74.1732046246109	58.6660977084419	121.718721047915	20.6588626450419	23.3867114778983	24.4051914549047
g4052	5.16761704037232	7.00571660198768	3.37224348266979	36.9700553741219	37.5282967322633	30.3304244180754
g4053	13.4753474034586	13.2199547694461	11.9502424392418	61.0524033216135	46.4372415880878	46.818059942336
g4054	2.3762554082957	1.92692195150704	3.54787438660635	24.9649499725271	25.5159418287612	16.5500115498461
g4055	174.026472612704	260.011164014317	245.524000009989	583.101185788907	574.932689051331	457.586823658026
g4056	169.132417559299	130.403271603529	176.957371766652	250.99521736218	319.09257200699	296.957385149004
g4057	15.8972127315093	10.1772314164572	22.4690556652424	6.57465312130132	10.8036127445043	10.6556010910034
g4058	77.1858293056732	55.1001441508509	97.7133076342969	110.906343703257	156.578334752467	134.817129557085
g4059	1.67226395134218	3.85403800243	3.22770902246506	17.6082575912003	13.8863381608124	10.4923100911698
g4060	50.0672355203575	45.9884084822832	42.1761211896829	147.431986194291	143.276531898384	128.844568991709
g4061	5.02381817314981	7.1251122734	8.15161207204186	59.1337222100794	56.45990986083	50.5121121647564
g4062	10.3517262231107	8.04495258738402	4.96520779032932	55.6036237298612	41.1098343036063	38.8879205623504
g4063	0	0	0	0	0	0
g4064	7.25486592279221	9.65097751562438	3.45072220423817	18.6356540428823	17.4496467179445	13.8794431042442
g4065	4.89905951470091	3.87813689684075	2.31639860104917	21.3394460330237	23.3437680283575	17.9655320936602
g4066	4.00500190027328	1.80985472185294	3.09209099631107	4.5345201170074	6.1388731771731	8.42463135993769
g4067	0.629100665689601	1.73985299699302	1.06160529310313	6.0846238956839	13.0824653715581	9.38652018506992
g4068	1.42660823278817	2.00925968696688	2.00616389621878	9.6678014148467	9.8649515175634	8.74690398965942
g4069	3.23400153445288	9.58287572051663	5.19749228143972	27.3441752988393	27.1745756143239	25.6362087179196
g4070	10.4130049407105	7.99955787059	7.25905171991122	32.5691907404056	28.9778654246754	29.9607004915485
g4071	27.4044322505056	41.4068333277731	36.0322093497119	54.7442355879357	66.53911661716	62.8876429012315
g4072	116.888820422738	84.4265717760121	108.639276912828	113.756566212272	126.57653864457	126.411987112056
g10831	0	0	0	0	0	0.0839449071337324
g10832	0	0	0	0	0	0
g10833	0.470099308416223	0	0.293811492027525	0.508967049337501	1.78393285036991	1.59412146435743
g10834	11.7662478188153	10.8259663967731	6.41327657841803	43.2865360781329	60.9532023564898	51.1469913432013
g10835	0	0	0	0	0	0
g10836	0	0	0	0.0716178430642215	0.753063030786781	0.305880332461235
g4073	3.29719967764636	2.68199980857226	4.21846779194841	21.5588625544116	12.8654993227985	11.2646146042607
g4074	16.3362446326989	10.8332151188332	12.2810560685568	47.2763662686308	39.3010837728269	33.1620139508288
g4075	1.295163081366	2.00305191273509	1.53374274883334	16.2611447145248	15.3396142850729	13.4700124442657
g4076	17.7232842713243	33.4742448773864	15.9671348770821	176.28590521115	227.227934191484	209.32463918183
g4077	7.06405874128489	9.31087269788188	6.15741371846423	34.7191978634774	36.2921341987519	29.1036665047493
g4078	3.46831822854486	4.93208148573291	2.00627057585486	35.3137147378577	37.7485142949965	32.2579246691682
g4079	0.575100176962728	1.21181577028414	0.585368675932077	9.78449016416083	9.16603860970113	7.19288162868243
g4080	33.2785381165089	46.3519532133685	31.25519007082	57.4125995833964	37.8626995131232	54.4041419144531
g4081	83.4487895943645	99.1561446081234	94.6106016855825	30.1161077033711	33.5299199112222	23.2328141506147
g4082	1760.00175021826	1562.77808313226	2052.79685269073	1735.89210817597	1669.12949917658	1158.211349189
g4083	18.383056167556	14.6987945713115	17.0582234130433	52.7360862572278	48.120177986231	39.9006381125163
g4084	21.0404436345088	22.3965205176669	20.3940341109687	98.1988086232248	77.88200070939	67.0063101092758
g4085	20.5590097547362	34.8507054072677	23.23028293597	150.93045796167	142.237911096666	132.093938604439
g4086	7.99243800273834	6.65955096008125	7.49289594500818	53.7832867957025	57.8130812541888	52.1203987549079
g4087	2.38003971802348	1.8284122178984	1.16876721415139	27.077071964951	30.1059156519611	21.1028426411933
g4088	1.85634399591297	1.55087799314356	1.17471538302292	31.4202835750937	24.8669232381916	20.2581989432349
g4089	1.85266882006088	2.52307191166888	1.78950614914853	15.884688958218	16.6175634603545	13.4302682117726
g4090	184.936491121975	180.95271714585	332.122347558525	128.932768059304	148.137200194807	152.419231382205
g4091	1.90496882973321	2.74396808640159	1.16770697045294	15.1776739230015	12.0390249057228	9.78006034056455
g4092	141.059053415481	113.361717953033	150.829970266002	8.38579835151976	12.6514589172179	30.5212957190411
g4093	2.43386605731556	3.464561034054	1.74486379109383	7.64695030734747	11.9525157365545	13.8585091463746
g4094	0	0	0	0.252558535828594	0	0
g10837	0	0	0	0	0	0.134775980618752
g10838	15.7215956947982	5.99242898405509	11.5644203262034	20.687614403817	47.1775383701276	39.2200482000225
g10839	0.769520015773031	0.738958150625546	0.721423601135582	45.5451952887717	21.8039699534003	32.3415690559712
g10840	0.231000109603777	0	0	0	0	0
g10841	2.61343344339866	2.1331937036755	1.53130565760108	5.97341365625482	12.2315305492029	6.84809035844146
g10842	0	1.34607944937812	0.547557780596751	11.1715696788928	14.6282493730332	19.9858038134729
g10843	31.2200935533114	35.4432258166964	42.0603213963903	90.2204368201471	77.7540544102434	153.633816118404
g10844	0.4142177922378	0.238660157579466	0.194164209640755	6.17885466178788	5.97311995890141	5.32055111534318
g10845	0	0	0.212503129845707	0.981646113532968	0.860169018627459	0.908400511044745
g10846	0.0710401166369598	0	0	9.94750557734589	3.0193299788615	3.63538880824834
g4095	28.9853527358761	31.5758297955818	19.6007124172939	47.2156907183395	51.2101426433459	49.9996044709023
g4096	2.90586710314292	3.46814210480866	3.35665910528367	20.7119814408062	19.6520180034153	19.8037519557871
g4097	14.6022278979524	14.5564758494194	5.97560238576838	64.9529428685291	64.8678476519324	59.4127887967107
g4098	2.42970115283245	5.168945085612	0.525655469372881	17.5372565525261	19.2915579610426	19.1287549292194
g4099	108.194788689808	120.990020547217	96.1826787831118	352.070529817213	373.997472945825	277.311347448525
g4100	25.4202534405851	24.0411115845583	15.9509245878667	119.225433804044	99.7699451491475	82.4231472408648
g4101	0.815648766057317	0.939905849939838	0.677278451810445	6.03862948624292	6.04895190578386	6.07777494145646
g4102	14.6380149453721	15.920350863685	10.6392667001071	41.3123803588123	45.3124652579077	35.289095840507
g4103	14.4227747003889	18.5841377041694	15.7339052057189	67.8553485232405	35.8242841788569	57.7196187354351
g4104	2.07739122957264	2.88914613525061	2.68627649853737	11.6852371454248	16.038405816659	9.93738055703331
g4105	1.53099008811865	3.07478914223905	2.8295922074753	17.1756044534069	13.2131478024788	12.6756809771936
g4106	2.91860681278092	4.84701009245802	1.93142719435547	23.0797843982578	20.3594284941312	15.98353091905
g4107	108.616915441336	130.470713426453	87.083441312422	342.443471144001	315.894345435127	278.425672182904
g4108	20.86339978195	18.7803410407993	16.6462969943294	50.8524681650504	50.4874640092514	43.6337445112525
g4109	24.2723962767581	26.0756989855074	16.6811958295816	70.985342301581	70.7513698117481	68.0885591531284
g4110	125.386098429297	146.79371846307	160.556815336344	44.0287515469995	32.597282017332	44.8465687886483
g4111	75.6380312371921	63.580028020115	72.3448620406677	69.4337320251356	83.5329737841178	69.5098970795872
g4112	99.0962764040131	320.023830231762	191.584474669486	69.5240680421041	59.7703982378409	50.1706113640046
g4113	610.014667767083	792.049406167296	607.748288457447	2661.43862335081	2795.94433132036	2748.79909503653
g4114	2.76423660567881	4.57893244628794	4.21113345211888	26.6856508885885	23.470759778357	21.197147180349
g4115	67.6193344092651	85.7913227802988	80.041668924442	147.899173583788	106.010259022292	89.9088999545127
g4116	3.40023961252191	4.826121075463	2.4102260999886	17.2994503306173	18.4736477224053	17.9985466073907
g4117	2.87315353715257	6.25383495735924	3.29214864358792	19.5859231684328	30.2862305859901	19.682734436636
g4118	1.00078628847812	0.411874101339621	0.201050422917305	6.08841312859176	6.61899461663442	10.9744247681544
g10847	12.8388918060189	10.5400767987224	12.6657936906037	16.0505817427358	23.755480886602	14.12433023173
g10848	0	0	0	0	0	0
g10849	12.6842219566496	8.52632329888869	6.56506295296465	64.1824749151427	53.7497286303055	35.0291955025273
g10850	2.5397996446033	3.08075400637906	1.75446342183406	37.2427684915604	29.4213598139897	38.3237428764306
g10851	24.815498681044	23.3614181361794	17.5863729728816	49.4235789913505	57.6511039120524	43.9810862056472
g4119	32.1679024368942	43.3725567765562	26.5671887926794	159.724941725273	165.169206332237	139.540426297631
g4120	0	0	0	0	0	0
g4121	93.6774781955934	84.1164975115987	83.5486108838292	32.9849552248494	34.5993567287175	31.7063410056898
g4122	2.26247475769824	1.246894647845	2.48994696018733	0.852012464090337	10.0041360943487	8.30893920514604
g4123	2.93495612793935	5.81551316430493	4.26149425901761	41.8773866493589	33.195395977431	26.1281446326553
g4124	5.07397864147967	5.41384787684072	3.87594831164647	3.66232962740842	3.85094681849504	4.75048373002685
g4125	43.0077541620471	58.9459070447169	45.8178301355126	178.258740869149	128.462766813156	121.734749162905
g4126	0	0	0	0	0.208602486602969	0.338921951261861
g4127	16.669467368705	6.65909141659924	15.5234110685072	10.2671339816868	8.26561982591572	23.2273289257764
g4128	192.877703455947	103.048265566039	196.644460770729	394.710518356634	642.603295841107	397.297463464277
g4129	4.90334133843792	2.8251616382178	3.11930701586974	19.4654125278333	19.8033767775759	16.8973089687462
g4130	0	0	0	0.877660700990842	0.709893812461425	0.922706531551854
g4131	0	0	0	0	0.110977709800157	0.0901542032517326
g4132	0	0	0	0.667764768730802	0.858190629884616	0.697162453745648
g4133	0	0	0	0	0	0.0933408024830162
g4134	0	0	0	0.157361793031884	0	0
g4135	0	0	0	0	0	0
g4136	0	0	0	0	0	0
g4137	0	0	0	0	0.157504703881919	0
g4138	21.9727156493849	13.5755987112122	20.085680292935	27.1314043680011	22.7065363402307	21.486495473068
g4139	0.830537995063922	1.25154434820987	1.13799454214763	7.19365402403184	8.19448649361547	6.93262850213199
g4140	5.05253604270871	8.45611993477095	4.84952285963278	3.84221975376607	7.32696399257838	7.26867604309522
g4141	3.01968319531008	0.289975499498837	3.7745965977	0.363261128100531	0	0.387872734920245
g4142	0.181616693946432	0.732495530757001	0.255397975402018	6.29224752632087	5.03115290568399	3.91915931273654
g4143	0	0	0	0	0	0
g4144	0	0	0	0	0	0
g4145	3.80422621445905	1.95870458460691	4.24939329571778	11.9765334724247	12.4704866046226	10.4299894654861
g4146	0	0	0	0	0	0.304997136121116
g4147	0.292696608125515	0	0	0.0422528960219439	0.133287010232649	0.180462428490797
g4148	0	0	0	0	0	0
g4149	4.49070520239971	2.66826943412565	3.5522110217007	8.81236782397873	14.9111620457768	10.2097635174665
g4150	0	0	0	0	0	0
g10852	1.4984700987417	1.38139931831224	0.936541976530887	5.84050818131897	8.56750076658377	4.43464057511146
g10853	0	0.319860463218564	0	0	0.421335715514909	0.0570462690242736
g10854	0.49779684636165	0	0	0	0	0
g10855	0	0	0	0	0	0
g10856	0	0	0	0	0	0
g10857	0	0	0	0	0	0
g4151	0	0	0	1.04870792105348	0.551359222540711	1.34371176436681
g4152	2.4146487966972	0.39749997162844	1.29355932060441	3.23674198117093	1.04721248308068	1.06339605513369
g4153	28.9111074675977	61.9493476004241	32.2857782544511	88.9943855385719	40.4786606425356	61.4560819436546
g4154	77.8142257462161	53.8649254721193	55.2076837069398	64.6562319549738	61.7626254242103	76.1138164365984
g4155	0	0.0673422351024872	0	0	0	0
g4156	765.939047629456	791.396398938357	664.550469873127	463.586067514867	295.728418402774	381.087336790171
g4157	1.42570380146081	1.41413964625679	0.888243309816359	6.10919312840875	4.62953959558542	11.4495046748
g4158	4.32185331643414	8.62172406816875	4.00816256031763	14.6916299328959	12.1681640354345	8.99675367730287
g4159	4.363243077444	5.28360393942953	4.64518082647258	48.8413080246749	41.9272989224204	37.3886992852473
g4160	4.1617428653312	8.42681547719423	2.95408847738953	13.5175054398948	13.5819643301577	12.1698267334537
g4161	57.4211115822313	60.8492782417678	53.726633315421	234.209329862744	222.601472752108	193.606102110586
g4162	5.52987366284355	4.27729888409615	6.46255373178892	26.9008651613489	27.0214775940088	18.0280503212849
g4163	0.421291183498692	0.208059118639242	0	34.5785035070074	45.5862384833323	32.4684451260082
g4164	11.4690291884695	14.8682669372697	10.2073191093829	102.442616235747	109.012530068268	87.6499689131612
g4165	1.24620471973335	3.1049801191422	1.10516249294757	9.65132565844358	9.61157145349147	7.93268370460019
g657	0.381605749507864	0.494707621302773	0.536632033698533	4.88902279761659	3.87371429646294	2.08810521898085
g658	0	0	0	0.326855001826139	0.171844339183944	0.418800032286132
g659	11.5949560292212	14.9240787500973	10.1074254170313	23.051686167708	31.2378095670402	26.7560548331263
g660	5.65118464946018	4.88407056948632	4.07944092503968	31.2447506473517	33.4972703253479	26.236360021514
g661	27.2196297587364	34.6017995029824	29.9785807646901	58.0395781960425	59.3121127841347	50.0102739616136
g662	10.2795048773681	13.0638933532789	7.10385820038208	33.7062216597452	34.1492998696943	27.4881196048284
g663	1.70702727595111	3.68827166202205	2.45051286967638	7.54666981901846	8.94749866511771	7.3015079837493
g664	15.9437218506117	22.180092804651	12.2921134419679	36.6437809598308	36.6601841430302	37.1216371474955
g665	5.61283417641003	10.5334391857733	4.13444564444349	47.6313403246186	39.6172245110541	33.5678135082467
g666	2.09074675471893	3.71426668404676	1.14337489100881	11.5695590815883	13.2893926507556	11.2254971365825
g667	1.58389905660525	2.00771172110636	1.18792196468448	10.2891335705825	12.9828530645102	10.546791568081
g668	9.37450462334514	11.5089556850372	7.94352501069156	17.9829866788645	17.1851572197168	19.9182921002551
g669	74.4021740852415	56.106872692819	66.3755430636696	17.6321495756971	18.3495404049202	29.503146652512
g670	9.3713531306833	14.5285492449797	6.20428252149853	48.3948151106074	39.9985465312763	33.208139778127
g671	6.25901084940033	3.90324470707926	7.24847262566473	2.87004914927279	3.1855213534399	2.40620018549878
g672	1.27821068501305	0.155045800451931	0.882972756145546	0.582691770271206	0.71481846849028	0.871038287045372
g673	1.99925540564695	0.0959926997935778	6.32575666141595	2.28480652005857	2.14958607750677	1.64352427581116
g674	151.214113352071	143.624477118788	111.978413757938	189.293727573186	164.149389695612	153.313585667691
g675	86.1227113176189	76.7265286145531	86.7132412545037	91.288778645361	106.185777129318	87.6036216295714
g676	0.931244344291185	1.40329955140744	1.67892281158586	9.46193981244574	9.62304348999538	12.1456873474852
g677	7.60941537518324	7.20281508404845	10.0000770611034	38.6918118916503	50.3786724386992	38.3286453870857
g678	2.56749890554059	1.4245281129404	2.58532369303036	9.81502332495679	10.897887907878	12.5466962493961
g679	2.33237244035468	2.81879614634578	1.75994221898502	13.4267404153583	17.183673124419	11.363919857805
g680	11.7065944915797	16.8303729852831	18.605086931166	46.9157459833764	44.5088021415212	42.6876241151693
g681	681.636445407404	806.528639723175	616.101459396754	1397.43410270204	1707.21657341504	1567.94737509307
g682	1.5399120005276	1.80180443465963	1.13272151155484	6.63472715852478	5.48404831684737	5.59436023768743
g683	16.4689250676144	26.0684400407735	18.4935712376199	47.5481955825532	69.0892904660631	47.6453853632189
g684	290.226427045286	282.848873212677	291.84996474674	123.082643215581	121.105073658844	116.976588916436
g685	3.01771848367458	4.92021045456639	2.19707131952126	13.0920637911341	16.2028496074405	9.77793004799131
g686	39.6037581677637	38.9257196012802	48.7037909866545	240.412131719953	239.665701531516	214.481140160842
g687	192.792738236468	477.17699023299	204.737839614549	1011.78528217612	524.169065253412	568.224605748891
g688	53.899173803899	61.5861128609284	62.1502309197693	387.149264270304	271.507212551991	254.214708093495
g689	0	0	0	0	0	0
g690	6.14487908980158	4.55207055468606	7.32446206256833	9.88436321491651	15.1903938835255	16.8864750849035
g691	6.76816021751303	14.1986005622642	6.61629750420565	29.3110027917853	36.5719954312112	46.6867371951222
g692	3.37805662764102	3.0326650491148	1.6571102874766	19.5342387659968	22.5973007764803	19.4954588969065
g693	3.23339602957842	7.91769930381261	4.42064997179028	68.5560160121181	63.2932205288428	61.1356566134632
g694	1.26578478723262	1.91923187856894	1.12421454888562	14.9546225300842	20.0731561930238	14.2940278031866
g695	130.136527076973	194.17378354063	123.255671678251	554.219838451247	671.515360890213	566.42303564935
g696	112.490828157531	116.516844426632	96.5556750046337	234.371080202598	252.07331739633	270.227462603309
g697	0.0414663367380721	0.238916884923911	0.0777492290318905	2.42431743387544	3.14712908388506	2.22425220858379
g698	7.11906948485092	4.72328402803825	2.73031959432924	27.7164810152927	26.2377274518763	22.7444013336842
g699	69.741304334557	70.9441519723911	56.2104726936466	72.6324697463822	74.8351139464306	107.282276115609
g700	6.18130179035964	2.99164741124567	5.73700948233181	40.1542254197716	76.0469584564021	58.3096569305659
g701	14.8007808815217	18.9233077779796	15.3952345283136	155.288404494152	167.623956301114	145.139176998198
g702	39.5205989735342	41.4771766561155	23.2416452906375	61.8425494978857	64.1615781447539	60.5644292906273
g703	0	0	0	2.15244616390285	1.33135375408721	0.973388470944901
g704	147.808459605103	134.914000896829	148.105734002254	101.375283019015	103.311369607162	125.555955784623
g10858	0	0	0	0	0	0
g10859	0.253189775304632	0	0	1.64474080968178	0.384321822608426	1.09273111872359
g10860	0	0	0	0	0	0
g4166	102.743392970277	109.942899188001	105.522914115566	203.946023727386	230.87641020514	200.995534289118
g4167	0	0	0	0	0	0
g4168	37.4397302242799	45.3599899162418	34.527879035713	80.2238824039388	61.6732156740449	72.4903161315545
g4169	296.802605614149	220.226181464455	275.70691065259	310.238913485065	351.627402769625	306.068599651779
g4170	0.154986880925263	0.267896701572427	0.0726499580738999	0.671204692781306	0.294072107009086	0.238893346724342
g4171	3.96892080207262	7.6606992601674	3.16272756669012	20.7691744886243	22.6671972266821	15.7834251549997
g4172	1.56508904953838	3.02990843173054	1.58464955748828	26.3436770990701	29.4584315429333	21.9624314129816
g4173	14.2063561538594	19.4593597584154	13.1299644077385	88.7547697103449	72.2194319329237	54.0823546256402
g4174	2.88327575828617	3.03360344201314	1.64534435535414	16.4679116407867	16.0791814246674	15.3035660578313
g4175	3.88741448210664	4.30951620748727	4.05963375102082	23.690181412874	22.5574281061103	19.8721183342791
g4176	1233.54058528417	1339.43728254892	1313.71167038986	920.654955656304	970.561809382113	680.545594649495
g4177	4.60196470303829	6.41297195247715	5.51833348899173	49.7086735702783	38.0542624675541	40.5146700676568
g4178	0.571966268292505	0.842183865700564	0.655376731521057	3.27976513578927	2.94223006451941	3.21300105140611
g4179	23.2763378883027	34.4684606545677	22.1177437932852	47.8929649704468	53.1572996342464	45.2610125056554
g4180	1.03578201025336	1.07712821016839	0.757887790690809	3.92041247582323	4.79339702565191	3.09960741516531
g4181	169.934250371251	166.536353427121	174.604255232653	368.242564142242	327.903095417168	307.069541015778
g4182	3.6989777657344	1.47345169403274	4.79496178192944	16.4806942280172	12.1999556447391	14.5001681547195
g4183	0.978068970253861	3.04308731847995	0.916937862845178	16.6605862586393	15.5886196934322	8.2615047282375
g4184	0	0.75811194588976	0	2.13684725993857	1.12344955184895	0.912649030357939
g4185	219.481320354616	207.376272360681	167.671071734086	138.064877859206	139.587763386638	107.957404538868
g4186	222.975568883581	196.682985961752	262.463186150634	585.700910500499	736.609260598949	680.913762023205
g4187	19.4813197272701	19.3444643450953	19.8180590267598	81.8251183906247	72.1974888410995	73.7285072967813
g4188	6.58088237692122	8.15937948245411	8.27815069271717	39.923987613655	38.8822187549019	37.4415374083231
g4189	17.6614311986995	23.2139983431009	15.5227118472529	63.6393269528684	70.0585151180974	51.2131540152386
g4190	5.18629612182866	7.58541019597815	3.67777489891117	45.8806323779392	58.8914774241648	40.5031462013819
g4191	0	0	0	0	0	0
g10861	0	0	0	0.120448190608009	0	0
g10862	0	0	0.203098354868342	0	0.246630126415734	0.734628507635035
g10863	0	0.0833016818180555	0	0.365240926794469	0	0
g10864	1.79947568969244	1.29600647204896	0	0.324709345359009	2.73146013092378	0.832101595877041
g10865	0	0	0	0	1.38903258141562	0
g10866	2.45265379530186	2.57691560554633	2.164102049348	8.22665368105003	14.9464779558852	9.25102330967112
g4192	5.21261697707323	4.26282957578416	2.62732195706184	22.695749137161	18.7173528873417	17.693426009605
g4193	81.5135680879149	149.855970969424	64.8602897083345	1447.3621398473	1433.0990829624	1412.77194512426
g4194	13.1601058173987	23.4213994662777	8.77338668654595	19.5252856354036	20.7528317326294	15.6868313658015
g4195	15.7537974156114	15.6304515470984	7.58416125929512	52.1567748357786	50.8728388452312	47.4775506423879
g4196	4.6263859298064	3.27352917811656	2.16861415513092	9.19761974739973	10.1025204250136	9.53303287072791
g4197	1024.77535109515	880.408720944611	981.282738265118	116.737084194681	102.416572187002	277.800517941294
g4198	0.9285418858409	1.13293828257968	1.02412507316714	11.1570096558517	9.82471158741446	8.72210779248975
g4199	1.67066522863535	1.01921120832455	0.230330232755804	8.5474457862823	8.95036290510638	6.42266818156081
g4200	0.299492522200325	0.185832573020378	0.259175713272151	3.74139830082251	2.74511896197964	5.52536967741854
g4201	69.2157752556159	36.6300458038649	64.3297321782564	52.2102860567085	58.6766878229695	63.5420676487465
g4202	14.5519604719254	17.9761821824087	18.2262947761039	53.6934298752966	63.8805544534724	61.2968944197244
g4203	27.7741358102368	9.09375308971702	64.6631345923469	53.5572939582475	52.0374813190255	27.8030888831764
g4204	0	0	0	0	0	0
g4205	0.798795910820249	1.03554630782659	0.65526098659077	7.24303699287093	7.72974031950469	6.00232586341125
g4206	0	0	0	0.355005193370974	0.186644330118446	0.0758114890980478
g4207	1.93405548021977	0.891476888393415	1.17856274882913	0.837585159900661	0.733935371491163	0.775088676874491
g4208	8.33142230823634	9.10649219865344	4.36479909014431	26.8397043186066	29.8957945073035	21.3023959211478
g4209	13.6328799440705	13.6331583257138	12.8542527762042	25.5614562556167	49.7122620969747	35.8918863035627
g4210	0.601681960404255	1.22668383860483	0.650856614486908	8.55209269073417	6.18237284023136	7.81885769417165
g4211	20.9518570748903	27.2694384540078	19.4669495937	60.9636625380562	59.4181121030212	53.4016405135636
g10867	0	0	0	0	0	0.0656771035087751
g10868	468.971070076024	325.895684056269	344.112019462637	372.066223444588	484.183161361731	441.948437973128
g10869	0	0	0	0	0.418884993232272	0
g10870	1.04482848636267	0.648307225032779	0.97952478655619	4.75690305237822	1.6469647456738	1.28838039643094
g4212	37.9844901416501	20.9608089128442	17.4827667880646	15.7218470952729	22.6801308742741	18.4245028330212
g4213	0	0	0.886842049555474	0.455190708064623	1.55556026052705	2.33294741911539
g4214	1.38216385116207	1.43657516769909	1.14333182766313	7.86365049740113	8.16580015972468	7.4690606338064
g4215	6.09515931251727	5.42936665503989	4.03149126201464	26.9092386898108	26.6490625173337	21.948432685137
g4216	0	0	0	0.265829923857803	0.186347125771124	0.302763080665452
g4217	2.63270206405236	3.72326515916464	3.02909729149681	11.4878688709348	10.626341802995	10.1818624845909
g4218	356.645196966178	516.416433729012	299.057706548878	1650.34822174547	2006.28361360373	1791.82919829108
g4219	11.6774731607446	13.839992266353	9.69942611457515	13.9142685815167	14.7361389618611	15.0322768199584
g4220	29.8257402738941	38.5451614549253	26.6839968860623	106.744895406568	77.6647358497568	76.6307739702891
g4221	109.642804702709	116.913081241853	88.7697655208185	144.074481325618	129.630632524684	138.549269486553
g4222	0	0	0	0.794107228839103	0.306168615727655	0.678327558536939
g4223	14.1669960574064	22.8358679353073	12.174738380061	56.60570913496	57.4089786715266	56.4114596400945
g4224	18.6068189174912	30.5803687372075	17.7298234476906	85.6447395437791	71.5351779429043	50.0256845687462
g4225	5.32542257718593	6.66744701781021	4.53379682349055	21.8370444611243	21.8693215680482	17.0026636462496
g4226	6.86056310072552	4.83489761409286	7.54802209193271	25.8233479848707	35.1142533212579	36.9503441613172
g4227	4.33937823153437	6.11165528610706	3.79694851235571	96.9560478259336	79.9201916965718	53.1522457486448
g4228	11.2059838577317	14.5399689192913	9.51293517534613	66.7446330595975	71.3875311320328	56.6325489152727
g4229	53.1654981986727	69.850609265027	43.449449833299	225.596205652298	189.100973058113	193.327493036681
g4230	158.427264184316	265.614746792959	150.393511512015	703.843963738515	746.017085957856	721.326110535775
g4231	11.1048665828502	29.2246621476664	12.2397149437919	107.123983175144	99.2015976946915	92.9858349056903
g10871	9.45241827803961	7.56417570531769	7.01545294373769	42.9257045884849	35.5711198036466	34.4817375241665
g10872	0.704514352966036	0.516626131350109	0.300218596215041	2.12649216764395	3.0137535572272	2.48775047215949
g4232	13.4029156069073	11.9747722641978	7.97088132765311	49.7339642037683	37.1041638318867	34.7652938920732
g4233	0.462000219207554	0.19964324417743	0.216562178393322	2.8761403896645	2.54213771875933	2.24316826281797
g4234	10.2716036437959	8.83177108369844	10.1851639434599	36.2425920683598	42.0070251019617	37.9734562710316
g4235	5.83431357904675	6.88319545465787	3.51620888296725	36.1455253945126	36.2675155626914	30.5329747862805
g4236	31.3520394156362	29.2763432215316	22.6355875505588	49.0305419829608	51.7608403173177	45.770206508359
g4237	14.9734195431384	12.116918120425	15.5359438370299	101.032967372982	107.960151401197	84.4872516851406
g4238	57.6432995022033	61.476641181725	51.11278604092	143.414458769611	147.640390296605	136.785038393133
g4239	0	0	0	0	0	0
g4240	1.78637737198165	2.02240229467543	1.29277056492111	27.1449092980001	25.6648472739884	21.6993745996775
g4241	1.14149966493275	2.49233179171823	2.19663156400707	18.8634115460678	31.8270580553351	22.5954570312335
g4242	35.6338506702579	36.4065921179743	31.5438441028314	164.311820599067	197.808114374178	147.297620118355
g4243	10.36693687511	11.9462506661699	4.91804023593097	37.2332725105739	43.3218952675654	35.1161028286773
g4244	11.6237478228701	9.74975699641879	8.59918434512559	66.4340334019362	55.932424269403	52.3115603404951
g4245	1.45464691660869	5.86687458125183	6.13677965423529	0.874953837435537	2.20803764121256	2.24216055021113
g4246	152.57662665343	138.217512954198	152.032249978105	14.2221705307777	15.7458911439276	20.986865309603
g4247	15.1108721697311	18.2420686979723	13.1063430363638	30.6429832762023	31.8310706357203	27.5062277205101
g4248	1.26844828200495	3.04030580471584	1.99780212940335	10.8034773925407	14.1709661580157	9.97912692923188
g4249	9.5197551847398	15.8221270986565	12.0999055060454	26.9563694115135	24.0373964170709	22.9697335606313
g4250	54.7314178605814	73.8742954028978	41.4782418231507	773.794985387382	848.385749223772	778.869208152693
g4251	4.04018056814824	7.30093293133004	2.92682961955423	19.6839994355663	19.8614908861193	18.3992689485838
g4252	57.7719659588396	45.2643654843397	48.3465989428801	48.9942865698205	54.481375690999	59.7668980153709
g4253	0	0.0198883464649555	0	0	0	0
g4254	0	0	0	0	0	0
g4255	0	0	0	0	0.0563302021584914	0
g10873	8.63958386580352	3.41076629352154	5.99969926132471	19.7471293476813	29.6890851088488	25.3513619543872
g10874	0	0	0	0	0.498513290667799	0
g10875	109.88436248221	109.914349521634	161.019750101003	462.388143586497	421.880546181523	293.447974973588
g10876	0.712864415906247	0.985755824232524	0.935632712476002	3.49884452717634	2.97569566534194	3.77984938987049
g4256	72.8006868426301	120.93861396556	67.9137477902645	816.416215338836	436.52445498499	507.322537421517
g4257	0.764717671485474	1.13578930560852	1.25859536806368	3.00513157985795	2.64399944583397	2.89179033700234
g4258	24.8212434843766	14.445730676253	23.857493152635	21.3539953144267	21.7877665458511	21.4095343334306
g4259	383.232791209379	557.293718035661	365.754908494115	1525.88886910327	1782.08647986977	1723.39746911016
g4260	1019.95935320316	1375.41732232429	904.789894190884	4370.49026099037	5011.30397367252	4492.02842827825
g4261	4280.12069360096	3925.9189745444	3821.39301688285	2571.05906551144	3026.59407324001	2844.05567210806
g4262	11.9221061722052	14.9595221281404	14.6542267879295	56.2207451336929	61.126980197967	52.4341957948343
g4263	49.3619788665695	33.2788156940315	39.8361838794547	77.9609857882908	61.0234561304093	76.3207771708501
g4264	22.3643225379174	30.2735561616365	24.3767269873007	148.392170829067	203.581263445761	156.9093143245
g4265	3.44712545328766	3.71763301066426	3.85314950679606	11.451588419526	8.78785058351323	8.28333408655815
g4266	10.8346115168096	13.2558611228284	12.5400350533544	36.2532596918118	34.1611340812886	32.6994632885964
g4267	3.15214800328152	9.08087669427151	6.81322321887338	28.5029254871845	25.9836252350074	29.9076970245539
g4268	1.09837575685265	1.11679753185363	1.21144147561318	7.5082148031049	5.68825284650108	5.25829631989175
g4269	4.11694813611738	5.93016228011389	4.58331218602137	30.2727457385957	24.3132855661929	16.4990090316412
g4270	8.49880324506809	11.9504297572743	10.7657620326779	37.536208566014	34.8236802659872	30.971828765633
g4271	3.36726274417881	2.37125551773981	0.701511697070269	17.8232634662756	15.1207382054283	13.4369138657239
g4272	7.85361153618953	6.83780935915	5.56296393733609	44.8451721690559	49.0091886181985	41.857724109748
g4273	9.57479962497026	7.06140039018033	3.08786682828332	32.0668625487552	37.5552870143248	34.853400004355
g4274	88.0227176813282	133.012393875913	82.2346044009012	273.326907319942	246.268777023381	216.453898153663
g4275	14.1056670701449	7.92409034350896	5.45491524820914	69.3599769312535	59.0148242287721	56.6383343835151
g4276	152.801522882182	59.3508007603668	151.543930483327	65.4429039291271	106.928679201446	120.687260934834
g4277	26.8740639456107	53.1228187339561	18.418871964374	347.379487957874	337.205278835209	297.85687210914
g4278	24.8307384959966	45.2844824382397	23.8706049039681	324.655337919274	330.076390492981	274.045108946542
g4279	32.564843695479	25.3186241470817	40.828583212741	52.6735568210047	59.2574376637886	63.1365025772429
g4280	2.07211754758515	4.87939053692193	3.88521278852874	19.0529824947049	16.0000483939925	16.1639928324423
g4281	0	5.59438358427377	6.13444610048434	27.4236044653307	20.5055815988857	21.7334571169541
g4282	39.3473870904041	51.679145941675	33.7861489884005	202.643419016031	307.5898560352	297.677257920262
g4283	25.199218219898	28.7822603646726	16.5993974264708	198.911211707969	215.053169328538	152.662561661071
g4284	400.787313325325	185.303672435715	312.671597361351	863.757001710002	562.327115604542	411.726622917299
g4285	0	0	0	0	0	0
g10877	162.896992613131	168.846127061511	175.059521403045	281.82545346972	246.163551277387	208.152059595246
g10878	0	0	0	0	0	0
g10879	0	0	0	0	0	0
g4286	149.499755716505	346.867116546707	231.288406524068	1388.9184597925	824.60925741087	842.243889278092
g4287	0	0.450399207396483	0.366426499562845	0	1.33489728118934	0.120491264041764
g4288	0	0	0	0	0	0
g4289	0.479390633854607	1.657265038275	0.449427838571084	12.1600513071121	12.2145719837009	8.31815174053011
g4290	5.91626179992407	4.15444664592241	7.58308437157371	17.9151519188869	19.3640135585476	21.6295905163893
g4291	5.26038533547501	7.15561126302738	4.56080447647498	19.3840484788258	18.0409447186209	18.0454096250928
g4292	8.87957230652028	8.9417386613943	2.32488346376333	14.7814769386152	13.2963387297298	13.6127935786204
g4293	0.945825179470582	1.88741122076179	0.951590541503869	7.82588872190995	4.13197708202973	4.1531629772672
g4294	0	0.455596121327981	0	0	0	0
g4295	13.4769858289402	17.3571581441663	11.8914347827284	87.8336692375133	66.9866020989628	61.667676733519
g4296	0	0	0	1.23317593486759	0.594314840640316	2.54567000234497
g4297	1.08808129621166	2.57367391101155	1.82539596606739	14.4672032841709	14.1691641095156	12.2519813345019
g4298	2.38482035419506	2.81950718049916	1.97444155413737	8.47252677677258	6.48773217146879	6.43522821529714
g4299	209.946699009011	541.474381130268	354.362156648883	606.820658208672	304.590362996384	511.695880416377
g4300	50.3126162203635	76.0268514337418	45.2609238800396	79.5307643790349	64.5855865018706	69.5657425661285
g4301	0.718009653832462	0.689493547993452	2.13158698290516	5.87349686634258	6.44846382916793	9.37026475031191
g4302	15.9259934719787	24.2405823626205	18.6831977101049	101.182068427773	84.028607279506	84.6970729752
g4303	97.652870779339	81.7277950161359	96.3701693850282	44.9238214189932	48.3052085635856	59.968712504184
g10880	0	0	0	0	0	0
g10881	0	0.252838829338901	0	0	0	0.135279412776879
g10882	28.9969990524688	12.8273453411327	15.0739436070164	43.5455634986367	61.8506372777804	46.5170378106904
g10883	426.138647019721	581.001310255169	400.700518084369	1367.86879675952	1332.85882655183	1286.23194522716
g4304	0	0	0	0.274461475022935	0	0.234445394152779
g4305	13.8211830283941	21.9703435699219	14.4613099317269	104.658343772001	99.6523878857614	79.6224498357329
g4306	1.18126339666577	2.34593015040765	0.612622103670106	14.7303719698292	12.3416167489519	12.2262986442613
g4307	14.696355504738	24.9908907974189	20.0336750885414	79.1272008284824	62.5223888710374	64.5538930755068
g4308	12.1170978096594	16.4440684804693	19.6213983453199	17.2389346043509	20.7868872402641	21.3010712963068
g4309	0	0.455012771620775	0.370179908009071	1.71002501595596	1.19872978216918	1.94760783260337
g4310	3.71427422326776	2.31357405361865	2.5410103255818	17.6070788630192	18.7424445091988	18.0108552947429
g4311	15.5774035449347	19.6817524413688	13.1211692162692	59.5851639790561	55.0922376387467	49.9714346216286
g4312	0	0.305296369962049	0.683035994352648	4.54164182627621	2.96586499315794	2.32768626192022
g4313	0.4832540909441	0.159106771719644	0.25888561285434	0.199317892315738	2.41020629920583	1.19180344983687
g4314	0	0	0	0	0	0
g4315	0	0	0	0	0	0
g4316	2.69096986318536	4.96146561446178	1.70287602970927	16.0240236824582	21.8019632889535	14.0195686200636
g4317	123.540112915338	152.222704067231	135.615939722823	69.4958809086355	66.1558716743633	83.2235886783163
g4318	80.7276334119395	80.4721409954314	121.903026762855	137.101462179029	128.686193759872	117.628941676946
g4319	12.565042842726	19.7216951150194	35.7453104568282	75.0561032644385	83.0321425599638	75.8003051059786
g4320	980.822911529797	1367.152840881	776.298779846166	3699.75926223979	4349.28610692293	4274.43463598625
g4321	8.59795744739151	10.5215388493212	12.055187732102	79.2486685811783	66.005779554412	49.6331253659172
g4322	30.6248528679095	14.2255417098252	25.3722847803538	183.348294211434	304.681997718851	220.433897825099
g4323	0	0	0.317007136134961	4.88132140885089	5.645990986083	3.33570552031411
g4324	7.88946198263013	8.07526127464403	6.09111680085957	29.0419891893456	26.8745926781023	26.2383734900373
g4325	3.25043632485947	6.62170760190978	3.7002662440327	22.4557322316149	19.735609167307	16.8197912458526
g4326	0.684885243192301	0.573979365452574	0.817191018407265	4.85352951227718	8.88386313629799	6.02689858697576
g4327	29.5055239559229	44.1833091339345	53.9186183251833	809.814777814867	857.12968513488	813.515232021004
g4328	19.5546465838904	45.6810145041364	18.760440080135	270.697635091218	171.742072086458	166.538369611537
g4329	38.4794300222334	27.0271638463372	35.2154807913205	17.9869297974627	23.3634784995326	25.9840162634093
g10884	0.198190968072649	0.761278865972204	0.80514923008057	6.67574033292718	7.72150952338344	5.94681691089417
g10885	0	0.34136885171549	0	0	0.33725070600653	0
g10886	592.743498109441	584.853681147635	674.823402970824	1583.50536991933	1472.17761722375	1321.93607877817
g4330	0	0	0	0	0	0
g4331	0	0	0	0.0720350343830423	1.21191968915745	0.43072702349687
g4332	0.34944492500968	0.201339928972139	0.546006625410925	1.13501093835264	1.41447850405912	1.90314756881377
g4333	0	0	0	0	0	0.150067257030706
g4334	0.0873117628315522	0	0.0272848724193172	0	0	0
g4335	0.866063275474951	1.45861622771239	1.56140909567447	13.9929104702717	10.8708528501262	15.1155236539444
g4336	84.4937672116444	79.2327896858578	55.1602966197167	142.589814731757	163.953224254163	130.764096603328
g4337	5.74885758787562	6.15145761686514	2.69477171382902	23.2171505624705	16.7254196115995	13.2495466938708
g4338	1.4775469022911	1.58102144772954	2.47356697600175	14.2450389861579	11.3741897931319	7.25533074413289
g4339	190.00384466471	213.817674269449	166.647332618876	555.533144944919	501.620450221366	417.794105854793
g4340	39.4170942419941	45.76282766893	39.7960267820189	275.859978001661	204.86565069188	183.523798320879
g4341	0.472349448701577	0.476269351416959	0.33212005531888	0.511403230887078	0.716988673079936	0.691665532931299
g4342	6.92542600720967	13.6137176544768	14.1308966997862	95.2689498321355	71.7305966614258	77.2764434739081
g4343	0	0	0	0	0	0
g4344	0.220827172446146	1.65404392061071	1.13863787672966	1.91268104183545	2.34638586434618	2.45072242308791
g4345	13.0482879248325	4.03407091949853	20.1392768838681	20.3292679850966	33.3324815435061	19.3274702206435
g4346	29.4956244148431	47.3451521417351	28.0642522820319	98.5723265402259	101.252662326978	107.240598003006
g4347	0.915089454958582	2.37261481581782	0.500438565055784	3.30249638343621	4.51435588960076	3.05608035429371
g4348	16.9247751012187	14.7407296434771	31.3033926081553	3.40913730047633	5.67579809751385	6.02640863306269
g4349	35.7174438127058	67.819902622041	29.6302311840534	19.5789073153575	40.7553216363115	22.172982246673
g4350	1.76176313099453	2.47149013656311	2.08251483767945	8.29315410743668	9.06907859788647	8.78419024500003
g4351	2.52567687404621	3.43432162219716	1.18390871480379	11.9224176562911	13.1498497230477	8.87609110196603
g4352	1.77704206656629	3.22915867909327	1.9863532253563	19.8316664472357	21.9423740595498	14.9596633873129
g4353	39.2490186226781	30.15217966607	25.0312128272801	439.009565128071	633.257548616157	531.390885641311
g4354	3.41271288685258	2.26423022068433	7.36834293084723	3.58290955724106	12.5581215274866	11.3494527864208
g4355	5.89632968086766	7.2857596734827	5.26139832855372	51.5834567567524	59.5778504757493	64.8238004362354
g4356	0.389966042388774	0.359499215615402	1.24301432438959	1.35106680572747	3.43323606934113	1.68303806601584
g4357	4.81107503528348	3.5679214320866	1.96491540914793	14.5091510866233	14.6418066013678	10.6903333542597
g4358	15.5539422911994	22.4293475115314	13.2783918932879	58.8300322221745	55.0012284118781	50.8955914130766
g4359	31.2759403715667	24.4470939997695	25.835407111731	80.5106458753449	55.2761082691639	51.7815052685356
g10887	0	0	0	0	0	0
g10888	2.24338376123388	4.89330830233794	1.35203667102923	34.9294119956183	36.7891540480545	27.3668248689215
g10889	0	0	0	0	0	0
g10890	0.0845354019520401	0	0	0	0.192476965434648	0.521203987549079
g10891	0	0	0	0	0	0
g10892	19.0932642187512	30.2249134149294	20.7928132819479	73.7784714253335	61.3306965583582	48.7526191430523
g4360	6.05552677469293	6.63485225458807	4.51371628698587	6.44871819150943	4.5582312548193	5.23307930251112
g4361	0.722002098498197	1.92398362035785	1.14222764415968	0.977121405810362	1.57541579434481	0.445151219567817
g4362	2166.52526632597	1826.2785790993	2427.6039847907	48.1385039360866	57.1100060148886	90.9109136375592
g4363	132.835442250677	164.482973522429	176.459253359933	22.8295647429334	16.5457313780774	30.0717090041257
g4364	2.024410150904	0	0	2.27296541751306	2.56074387274105	2.7736719862568
g4365	0	0.575423276070038	0.133754572359512	0.463403725697989	2.86947847983627	2.77088099085079
g4366	1.45602052087367	3.15432555389684	1.14661391336294	17.5716508233853	20.1121162295905	15.7997156656237
g4367	213.489717054288	208.736592591698	198.693165380902	73.0773701188864	64.6223312121286	114.51885902304
g4368	0	0	0	0	0	0
g4369	38.3342246259231	31.5529389243796	28.6650448337265	108.782495929632	123.996466753584	111.6332170411
g4370	307.448821868972	265.425498296634	256.443716841097	908.986524629581	1782.01327517355	1632.41658596337
g4371	0	0	0	0	0	0
g4372	1.74940518675427	1.33050194724101	1.90247441263841	8.86413409819648	10.7546013089693	10.2682507575632
g4373	4.48954279282642	1.96235678764763	2.03190116173252	30.728800435236	27.9640429781679	26.4394851708029
g4374	104.23732624372	137.643491451206	104.851727659986	204.701699938311	166.881457133175	152.302187251484
g4375	9.96397887951671	6.6977781972288	6.07178773185154	12.5857657003651	11.217354392676	12.2866051475221
g4376	32.3904066426764	60.2118862840941	26.6953377797862	967.632050226105	622.571809881669	439.69865661193
g4377	3.78770605862649	7.8565149791323	4.23028298806436	29.6926980720129	28.7721713610787	25.749380773921
g4378	6.06027085222236	7.45964886461982	6.37015858373567	15.8068480315911	27.5273294737442	19.4466119502724
g4379	173.266441983966	181.877069171499	169.125552221034	348.490395516421	367.76441105537	268.325852980394
g4380	252.339497989653	250.094538671241	221.232388849108	86.3255324214312	111.395178993719	140.755170503272
g4381	30.5429378145441	23.8423784899435	22.7840017076425	159.533436051058	148.30770397367	129.186652770759
g10893	2.26233945031485	3.09579757821214	1.98838038621104	8.98109424550062	8.90706793552872	10.8972498084539
g10894	40.7419400627393	38.5701009055956	30.6739197676736	227.926755072207	142.143769517474	141.905794354436
g10895	0	0	0.553056926169459	5.1096299855059	2.79832603979593	2.63697810859838
g10896	1.83369971579494	1.2429694810627	1.11235242731932	4.51560645754769	4.4207091494581	4.1232540429486
g10897	96.4474985921156	140.297035440845	90.2540522885513	339.482088924988	314.611908757014	345.91781191621
g10898	0	0	0	0.06240209034023	0	0
g10899	0	0	1.88961116441232	0	0	0
g4382	9.89801873848882	6.89106269771911	12.6624796283237	21.9537063162361	34.1961616904876	19.9607012379077
g4383	0.284750827627925	0.492195255728289	0	0.154146991858449	0	0.131672586328188
g4384	0	0.53843177975125	0	0	0.797904511256358	0.216062743929436
g4385	0	0	0.0755252111167933	0.232589609449948	0.855989513991495	0.347687174139323
g4386	0	0.14393073091771	0.819673372655161	0.540919213228677	0.663573888124634	0.308035989725239
g4387	1.2026161694971	1.51780769110937	0.536881166490408	12.0697810256511	13.3868176249411	10.0628665139281
g4388	0	21.2349120912696	3.95471537433161	158.648217193063	46.6755948317374	26.2821894991487
g4389	43.5097854957906	165.807667620923	56.8917955404189	451.237083820567	211.554418325517	154.367203979684
g4390	0.306302290743983	0	0	0	0	0
g4391	2.94541687030604	1.86676920773356	3.31358748601816	30.2949632423239	23.6958079624301	19.3858014944902
g4392	182.227586462434	125.346918326091	178.372422607198	33.5905913967615	37.022769322295	30.4216343452646
g4393	23.6109750137479	29.7449757203792	23.1316876293458	150.638876517395	147.276436819194	122.684489812498
g4394	23.9677574860914	28.5396741287839	17.4764555879585	181.16531218445	145.928788218722	125.935845978076
g4395	82.9990112967031	62.9700556860539	61.3791951449277	193.639131643547	223.566210411266	197.827077236843
g4396	2.45462842150315	5.17421337559442	2.80635321447374	34.9158049009569	35.5326453417573	26.2446394140496
g4397	4.52177633901822	0.8684383544375	4.09785177736923	3.91650890751203	5.49095577638784	7.71320763274977
g4398	0.643362614021646	0.494248921607545	0.40210084583461	11.5060688786099	7.21578921321621	5.81776734697342
g4399	12.2386137743223	22.4683754900273	17.624965337959	52.9684140781889	41.4279439011751	31.2731830356293
g4400	2.56621020476379	2.19674021410638	3.7118324870125	29.5302536813907	35.6141877270234	30.1070026063158
g4401	4.69660502871644	7.15792874481396	4.82916103034777	24.6591263979032	27.5964026492005	24.4733118351122
g4402	0	0	0	0	0	0
g4403	0	0	0	0	0	0
g4404	0	0	0	0	0	0
g4405	0.352460307813066	0.304615956313925	0.0165215445542651	5.54594432380192	5.63094392689593	4.3461961176731
g4406	0	0	0	0	0	0
g4407	0	0	0	0.129036670286145	0	0
g4408	6.7373120348192	10.7044729201788	5.45491524820914	51.0604639446591	53.9226034485594	44.528521804193
g4409	13.2015135179526	13.1758104513014	13.4638603117181	52.0688272710268	56.5950539956149	52.0036669859608
g705	3.29823685904858	5.3843177975125	5.41115924354437	12.8950415827398	4.58925470526533	6.60897804960629
g706	62.137305602001	108.907872823715	67.6029546432287	453.703525288573	383.565798485743	325.1217576016
g707	19.8679506033165	32.4506951628232	13.4432337125334	404.649238941448	331.344189720157	219.108199748632
g708	24.3792658460808	31.2790686721019	21.0294318279065	88.6634150277586	87.9364037290083	65.7415361194913
g709	24.3292356815451	32.0274075886519	42.8983199143386	48.0879017537768	30.0819172059868	23.1957014747234
g710	35.1933787673439	34.2819248930291	31.2728320602893	346.766187374575	362.703720086702	270.685108552385
g711	0	0.033509191384802	0.0817851508218061	0.16791193304562	0.132419796304686	0
g712	1.85494824854762	2.778793786626	1.91291163290582	18.2087235182735	14.2190983379379	12.1800904427469
g713	1.63528168608956	1.57431120458883	1.18376567307425	5.82691770271206	3.99041518673695	3.9563643807189
g714	3.04010363047914	3.73109014004112	1.78420366497888	21.1224248931973	19.1526073381318	16.67130919578
g715	52.9251593398529	46.5642823907601	47.9540919566919	321.75349408431	280.914748586392	250.353814122903
g716	3.39846151428535	2.55909310703376	2.90214585382082	13.1634298836914	10.3171853734083	8.09086019820868
g717	6.67763112112493	9.03569079208544	4.31579006596337	54.4421079493452	47.9929441372481	42.7305190422127
g718	4.5350756811918	2.53379661059412	4.25162511992772	7.73702494964387	4.38065221866236	5.93113414708256
g719	7.01120479568652	4.03965081345376	7.23029077757557	23.7458615440008	17.8465665663309	17.9561063160665
g720	10.3888613122337	11.0263954895868	11.0210566052027	116.227378481809	131.135512110028	70.4579075594006
g721	10.9511770710597	15.3116537366762	10.1982636636145	52.8541716411769	67.6002433147748	66.8444114031694
g722	1.10872933962368	3.4678657000928	2.52433417495451	5.94483272966987	5.64994531511094	3.90621909928924
g723	50.1683172774672	71.3995024028471	40.1184288441119	375.972948426057	334.459376558194	254.284333831095
g724	4913.4364705595	3634.35701313087	3837.55812056459	2511.35208030388	2007.42155998213	1849.20912743749
g725	211.093044483854	95.5756762617979	203.305976184432	83.3792411681953	81.0578340704722	66.9341098281786
g726	0.283111050703678	0.741455880979438	0.0482574708988624	3.19522450958933	4.43413467892311	5.15723124385068
g727	1.96334335993388	2.54524708982003	2.69520937570679	13.1842293659522	10.164604384718	11.4997651430201
g728	0	0	0	0	0	0
g729	38.1336471257203	48.3099850311375	34.7509942598086	84.9664849101916	107.768178176755	98.0612877440726
g730	15.498183249266	22.3239979412919	13.2738809390267	73.1257835774695	140.932189399386	115.756276955526
g731	220.107515277168	197.960089294279	204.494474978929	52.6040719700758	64.6063624235533	90.9990934632336
g732	5.05918030785523	5.82990297433909	4.14570907307085	12.577900006474	11.1209537097698	8.78009254708999
g733	81.7479913096334	74.4298055184332	71.4912235793978	229.85374828716	166.047269836725	172.221882119659
g734	3.96679079090871	4.23810345421377	4.28530781318551	18.5632424280164	17.5254876209506	17.5898154117458
g735	0	0.235966118616086	0	16.2581063657344	11.345149580148	13.8876982817858
g736	15.6776416098447	13.720500039721	13.0937730142701	36.543588264631	45.1037689001858	39.0733032839782
g737	2.65594862860228	3.287267707955	4.70323314702052	25.4183718453617	35.5370804545522	29.5968053438779
g738	14.1819391487825	10.2186336524575	9.30387807828052	24.8398604237383	15.7686848842081	38.9428816069806
g739	0	1.12814277662167	0.688358352750202	4.76974834807716	6.31568861819848	4.37612795641208
g10900	4.23170012104346	12.6988627299823	7.60382125507941	28.8893848869625	33.388205544396	34.7331052505434
g10901	0.762386023043368	0.439264492751329	0.238245165352357	4.86080658463569	8.10068692103694	5.56225803078335
g10902	0	0	0	0	0.451619855221479	0.18343966681901
g10903	0.884258484074673	3.56638684222333	3.52321049364619	13.0840408687995	13.0867779337244	9.67713278904027
g10904	0.478116505924097	1.65286034714337	0.672350018965313	2.76078457356404	1.45148520910717	0.294783278539386
g10905	0	0	0	0.0649703024645653	0.068316401041603	0.0554977275709002
g4410	8.8155837046036	9.97386103447742	9.21627399524178	51.1351399478542	46.1453854095962	42.2632502436055
g4411	47.7365275380571	49.3838197992522	52.963214599174	170.568095799333	151.185817542522	146.717466618006
g4412	6.28209328169955	11.8130852012314	5.86015016023279	75.0082043184323	75.4317754231206	70.9514401915884
g4413	20.5590097547362	27.7434059145512	20.4152595670915	97.4311753206638	100.293330789147	81.1410367816406
g4414	4.30705511621567	6.61759729303212	0.807571251829845	22.3831766055017	20.2670717570516	17.5264304014269
g4415	2.30482172138298	0.910608519246188	1.41993202809459	10.3617851507805	10.5955630735274	9.7848786531187
g4416	15.0925586382128	13.2559301192116	8.10993368146164	59.3170136751821	59.4384492578993	53.7326315371636
g4417	4.79194964208136	7.7485595973225	4.70982030829085	19.0789933923086	23.9917954629397	19.7283155058577
g4418	5.31010553533794	3.99683906975696	5.26597222975819	16.7711067957008	16.7496148887603	18.1108191925564
g4419	3.27300044225714	5.70127689777332	3.49658519057118	23.4317885444639	26.140571507037	23.8402293091979
g4420	213.629037550297	150.559231494168	176.815113969652	290.467317566139	305.386371975587	256.458896552618
g4421	0.68241900048914	1.07471888766459	0.959649838974611	11.1811317033187	11.5498105251123	8.90579488882268
g4422	25.5281951877116	47.7619960378902	22.8932454374279	143.406095398832	152.77674603311	122.900822749006
g4423	15.1540612442773	14.2611660582764	19.1793211798213	87.9597327088757	101.115826952007	81.9870520207915
g4424	5.23870576989313	6.43922943847474	5.34783499418616	38.7365746048697	37.4624551705011	31.5097618855492
g4425	0.441180466839832	0.581017739032618	0.324976046362756	3.45732832097152	2.8700427954449	3.12811869608855
g4426	165.018746180481	138.032797760005	183.595724156879	148.895064004452	202.527782073917	191.423930919923
g4427	19.775663099905	55.5769403738758	22.247577392584	169.428715031395	90.6073511159463	132.580899275839
g4428	15.9989286437232	23.9581900193075	17.3176469797156	154.584475702009	76.9027967039461	123.897633611667
g4429	12.7367331034602	15.577073698239	10.476242843726	87.8124330592813	73.7767620824244	74.1575491418515
g4430	0.333905030819381	0.989415242605545	0.849667386689344	6.92037734028828	6.48032578567164	3.94093097666808
g4431	0.971801931683957	0.373282536382169	0.506145847610442	10.1318183864384	12.6204504394797	13.0484951235816
g4432	3.08385146321042	4.6470804375454	2.52045058391612	30.4203950199587	20.2845057972728	15.4545802683476
g4433	0.260901139019494	0.601294373326269	1.46756603124408	6.59102281601186	0.198013527892159	0.32171779129933
g10906	35.1267104537282	44.1577779133274	33.7865830536268	154.977622197221	187.426248377167	162.852498945157
g10907	0	0.249378929569	0	0	0.164247010504233	0
g10908	1.79921322240982	1.10576421512509	0.112450606050208	9.09053555253911	5.18901728051587	7.02561080999645
g10909	0	0	0	0	0	0
g10910	0	0	0	0	0	0
g4434	1.40454379195465	3.84397069062378	2.96270375564562	20.6557846670691	18.7881187506763	15.6416387805677
g4435	1.92606961616196	2.05508312882156	2.8757233057295	10.8642429024751	11.7486194363108	9.76405682490277
g4436	2.81127957407213	4.92975589070704	4.92736894596458	20.644332921523	17.5330265969293	19.7445209038331
g4437	0	0	0	0	0	0
g4438	13.4799621481174	9.05327771263164	8.5283335738963	40.7093565991246	31.3199096257166	28.6044128246404
g4439	17.2384278082602	19.8645542235894	12.5862122303476	65.5953027157854	38.1645825991964	31.5912450938558
g4440	0	0.357510034844894	0.193903761338085	1.86609872772972	0.863370855014705	1.27521941420459
g4441	0.938437945265344	1.2893626186459	1.25200009383639	14.9277938702696	9.42344154367684	7.43272023592462
g4442	0	0	0	0	0.104161989305088	0
g4443	29.8763934859466	6.06863010872345	39.4025815712184	21.7836782793409	38.585910989886	58.5703879635842
g4444	16.0424445865288	30.3603129590831	13.9407027741848	205.709314843776	169.099987150134	139.500966816834
g4445	0	0.281143176135937	0.457453335688425	7.2200304635978	3.64163170045975	4.7634085950688
g4446	1.21795081485404	3.22803886912479	1.48437464692579	17.3182806003117	13.495888837048	12.7657924533348
g4447	2.77200131524532	3.46048289907545	3.46499485429315	0	0	1.28181043589598
g4448	0	0	0	1.12825329015583	0.451946879012371	0.550717493578288
g4449	10.3983430840429	1.71177733446929	22.2821200890239	7.07650525629944	43.7438208611707	45.6104705682255
g4450	2.65247522865541	1.17972377274606	2.39943835046471	7.99396483868673	5.82746013955149	5.36521580519512
g4451	0	0	0	0.216630906319806	0	0
g4452	135.430202532582	3.93102848048479	278.663299527062	47.1112312255998	3.53839660350656	1779.01219466973
g4453	0.888868682173231	0.662769535604285	0.784294359186394	7.81210054974997	5.19850978058285	2.93358842554582
g4454	20.5976908643406	12.3692418264586	23.1179616116484	103.371968484407	141.796313772093	100.821150199597
g4455	0.108662842255477	0.751300157792442	0.305613644984233	0.156862759861593	0.164941501034906	0.334980998340211
g4456	2.93971080441338	0.764930757211185	7.11218962251131	8.14514221801613	13.9625110866836	11.0502938408191
g4457	990.6237685053	942.685541080838	1340.57134865067	298.335970820795	226.190928201528	259.297200217877
g10911	0	0	0	0	0	0.285488310297153
g10912	4.90698519237889	3.62469374373546	2.00525444252813	8.53663651036249	13.1779578195257	13.8082693631607
g10913	0.335931531940133	0	0	3.23294489823676	4.50426850701967	2.2783086723714
g4458	1.15500054801889	0	0	1.16712943348704	0	0
g4459	0.562952074335601	0.389227792591265	0	1.70659123078336	2.22174214647018	2.49903896593083
g4460	0	0	0	0	0	0
g4461	11.1718474060255	15.950535430225	9.78193448645023	30.3022290055938	33.1427003338898	25.0177914023558
g4462	4.97760324215916	3.47630202627366	6.85833193715902	34.0768521419648	76.9870204225178	80.5366084097554
g4463	4.77137427754969	4.9322556206565	2.82861248024315	26.1332287193852	26.5738209315807	30.4129820033007
g4464	4.03726777660982	7.87314143201223	2.91148547991022	36.761806670645	27.8128245884056	17.2327989115925
g4465	2.79986514169559	8.57300717020278	3.22483835296203	28.0617101256524	28.0498104709369	21.8988418438675
g4466	0.296524179154848	0	0.231659061021702	0.713423898216669	0.112524995177179	0.0914111608932231
g4467	20.3470612005636	25.1564208848728	14.4058500627104	132.252609981163	122.093099921729	107.220579812241
g4468	4.92658298270175	8.843183700615	4.08573990019474	78.0939442796288	79.2037686483372	63.9917442880903
g4469	0	0	0	0	0	0.671855882183406
g4470	5.9005100198611	8.42441636621631	3.51385816169236	24.8302423029865	13.1531022040077	9.51820087818147
g4471	84.8102247009239	70.5830189979112	111.668731769236	72.9104070199832	181.546196057201	93.3139846113134
g4472	1.47867145279136	2.68211888155258	1.59162240326898	9.30909862286769	9.372886474499	9.85961333335251
g4473	0	0	0.880897343556017	0	0	0
g4474	14.5631785754672	15.5722579823399	11.0699620225304	70.1714094348045	49.6383395019413	45.5014074643995
g4475	19.3842091973227	33.167397632677	22.3028106291065	98.4688047858595	89.4970228308243	80.8527365188134
g4476	21.4817142598576	30.3198260266658	18.7198716126598	73.9359308373437	72.1632947097927	67.245109812391
g10914	1.3194230297672	1.24398474201572	0.787154242351456	7.27242844203129	7.92007900710317	6.1381652339969
g10915	0.35203783826603	0.811335558529281	0	2.79505801219133	2.93900900645417	0.21704933180126
g10916	2.12386464408431	1.63161145379167	1.32741280144667	11.1396326586559	12.6805026704714	10.7376636377053
g10917	0	0	0	0	0	0
g4477	0	0	0	5.82969242542763	8.08036632034216	4.97973181246891
g4478	6.13498301699686	12.0968625318119	8.69120891005559	58.057944820391	68.6014453356041	48.416394183445
g4479	0.742500352297855	1.33095496118286	0.38671817570236	17.5069415023057	16.5301565948883	12.9198353459357
g4480	13.7321630041177	23.6393276475303	8.98544109315148	23.949881442423	25.9065179736161	19.7323168974306
g4481	18.0857454233393	9.3517098588375	20.9405856784009	22.8724774586156	23.6984972298964	23.1593268981808
g4482	3.55743499721462	6.66149195424041	6.80913958163862	94.8982375813861	84.7672071335201	67.1253617718003
g4483	0	0	0	0	0	0
g4484	24.9475407288946	34.7070709422254	20.70222537435	99.9200851163772	80.0857704175125	91.6423298385139
g4485	53.9252714878325	40.9252286363389	40.4043783938049	9.73063415272571	9.04873130616045	11.818514025867
g4486	129.990061677035	128.376655801365	86.7233087111439	36.3022726389801	26.21828556338	36.1237486479777
g4487	0.808404770985072	0.980587678354925	0.917431248284623	10.6871844885172	8.46048859985586	9.23393978471057
g4488	9.32044463256764	7.78285095566853	9.11780840436535	40.9979683532344	55.9756401764425	50.5528144097011
g4489	396.616551821002	512.279379020475	313.914164502117	376.674341537774	351.492480802801	343.380755633657
g4490	0	0	0	0.0427643143599617	0.314767325606094	0.109588019975737
g4491	3.91784902873274	5.58749960119222	4.00027118202004	8.56754797616878	8.77326956108458	7.77282324073192
g4492	22.3821951908086	40.1397592114486	26.7501912135803	164.547338669867	124.535233306976	98.7917169166999
g4493	0.841815686044701	0.323353025146338	0.0876889621337836	0.270049446458721	0.28395752498457	0.6343607404419
g4494	23.5796738566314	34.9859570231172	28.0297044388238	77.3107636628198	70.9992793157915	61.6680431349224
g4495	158.015529519873	165.725106235125	174.535820350216	100.738486690335	80.1358643339719	82.7585782808508
g4496	131.175917161973	143.355966822002	145.018915144162	115.605299628122	150.028884761472	134.825711060157
g4497	95.6147379041162	142.853183833705	86.5893163728164	221.92381368765	202.379282868312	197.891974658873
g4498	0.971801931683957	3.73282536382169	1.61966671235342	22.0561892566313	15.1609307227515	13.5145128065667
g4499	5.32222885662548	0.876146387169194	9.2663624408681	1.42684779643334	1.2695127661015	7.96917812915278
g4500	26.3385654015551	20.029215375394	22.3930684048198	31.3255256885012	37.3900481899937	29.6511002111738
g4501	3.83245832213391	8.24376080348227	5.34946259220952	46.1650871137653	52.7441104154438	42.1647548661411
g4502	47.9844075330268	63.9703225825557	42.6325065736502	187.011812944249	194.357625784415	168.65835284596
g10918	0	0	0	0.279985227979372	0	1.43498275213512
g10919	0	0	0	0.743447749644625	0.156347354688398	0.571548741456625
g10920	0	0.344847136958588	0.140276811331919	8.85601019503894	4.20180670976986	7.65707075041535
g4503	0	0	0	1.18713736663254	0.124827727983217	0.608432686905293
g4504	7.63787158422522	4.20450750870593	5.83785219180483	6.25030913572502	12.7382767848467	11.7878434075653
g4505	48.7830101190234	42.9142152992808	26.6034276528149	27.0640807839614	25.3120741839417	34.1661500284778
g4506	1.22699660339937	6.59828865371558	3.45092118487502	4.42814833375863	1.86248267879468	3.27819335617076
g4507	570.738016640557	733.847489225266	602.422904536969	202.495821615459	144.821881841346	316.029080944252
g4508	0	0	0	0	0.0563709031716117	0
g4509	0	0	0	0	0	0
g4510	0.462780185812857	0.799921158437423	0.759247254580976	1.33611408737483	1.09759890249734	1.7476318736142
g4511	3.12139253559802	2.67337896388598	1.54223906689212	14.4007995080322	13.445744191873	14.4077293011187
g4512	2.94903828449084	3.27693111856806	1.7773186976747	3.26888491068129	2.6378810344814	4.02608719562502
g4513	0.793784160414523	1.55500761101905	1.30229958628417	7.96390414874144	6.50646458599779	5.92184323644952
g4514	17.6879260982144	19.6440322637426	21.2687281560474	19.6129303090787	17.02373160619	20.4675896078126
g4515	52.4109966986936	77.746515577603	43.1629772738577	26.9613944182389	47.9092336273614	61.0575055521157
g4516	2.17113831690959	3.36793233475599	2.11372426758388	13.13951796943	11.217763938378	14.1069723304267
g4517	2.69653148611404	4.04893850273992	0.306423432066862	52.2557485510944	53.3345817098403	47.6093740995546
g4518	12.5172603905918	14.9684653302473	10.185015029779	73.0454281450376	78.510259702253	73.0617223470062
g4519	2.86204312130898	4.6722386456373	0.894386722830888	24.6172626781399	28.147783789719	20.5869528631915
g4520	35.3842253316439	20.8337924828373	20.3394327345286	66.1799254325613	116.339912936619	97.0581351205967
g4521	10.7382251761553	12.2539646426147	9.52950457914833	47.2567359435366	45.3386714847764	43.9342188027983
g4522	1.92525843857061	0.475404648342241	3.09415928460291	0.248147442857972	0.730597070135885	0.805478055406951
g4523	26.2794314489203	35.5594390371549	31.0450061479206	116.826502470011	125.160145270454	84.1635757588355
g4524	6.4167095663074	8.31392176684228	4.84843709328403	31.4987729073501	31.4249928560234	28.3431375887559
g4525	0.299306191835369	1.03470875824084	0.436487341116271	1.34421895283529	1.03484649937559	1.47630059909081
g10921	0	0.677660134698369	0.330790055097351	3.05613166467186	3.65985186449649	1.88539877235145
g10922	0	0	0	0	0	0
g10923	0	0	0	0	0	0
g10924	0	0	0	0	0	0
g4526	210.289988405713	169.975275089586	270.243194805378	61.1487081435136	72.3466682552202	64.6415149481737
g4527	0.61114773349394	3.80295454425972	1.03130977938794	11.2044029103992	13.2657291183115	11.379475788087
g4528	121.623844836187	126.078332585317	91.1222888739623	231.770940082033	268.425962092623	211.784273752616
g4529	0	0	0	0	0	0
g4530	12.697792284327	2.21948977912729	17.1874625481973	1.08127535996197	3.14018399680195	4.61813498475131
g4531	0.43136822817323	0.695916861785082	0.525728997904057	6.75642070287611	5.4019552867265	4.28196524827564
g4532	12.4409655606288	15.0602923236046	13.9018092755909	32.8349424450625	31.9985503807834	26.6917609819266
g4533	6.81859335153115	12.552973469782	6.11227289968467	57.0588288996545	53.977106213673	46.5958568691234
g4534	82.5535526831104	29.2707315015351	46.1386139140676	139.79802966136	131.0329673569	118.681568994959
g4535	192.402574842843	189.761779218911	195.910410131406	516.931937197309	523.793981936155	435.309570400991
g4536	0.94632956293377	2.6580809380125	1.38622222935886	31.5055874775177	27.1130421827758	24.6876755510934
g4537	6.90087735846485	9.4659040781622	6.96216592592468	19.5319393364209	21.6412017759283	18.466020166128
g4538	5.0745087546951	10.3585465103061	7.20397599070028	13.2904130432239	23.4382105610236	16.0904271924883
g4539	0	0.036548902050378	0.0594694041252874	3.91469626840026	4.8625426281645	4.57591692172678
g4540	0	0	0.0516176590171549	0.437148869608928	0.167150144594559	0.237626585003629
g4541	6.18196900874873	3.56186944507766	4.75535145770378	21.7954576275538	21.5946194805199	16.4676348855599
g4542	3.53045387889001	4.0004834007849	2.15136611678082	23.1464605328682	27.8665219882396	17.4136430138893
g4543	5.53475412173063	4.36097529849149	3.54791235655879	13.6919605389912	17.7720102829304	12.6873475036337
g4544	48.4705583055852	43.4424912045314	109.102446889201	153.969553103964	149.636883487854	137.873295366969
g4545	198.357800494804	124.788888841786	232.427491077774	164.609514076334	133.932189381618	116.590105048202
g4546	0.0449573797392	0.336740627616133	0.12644238274878	0.697667105362987	0.733598335785907	0.859274240745684
g4547	9.6802512298085	7.30383916478713	4.75368548536014	87.5048002870956	76.9677694963781	58.7600233640084
g4548	7.45060376162579	5.6343257586654	3.38332417999533	24.3679102720439	23.2373247873627	16.293202615079
g10925	0	0.312546151834499	0.127137426629325	0	0.823401899625441	0.668901370828158
g10926	0	0	0	1.41518419046794	2.12581280625369	0.51807960397249
g10927	0	1.05449547369681	0	27.0804703441769	17.5944126979312	14.6691857006098
g4549	28.6484962519548	26.9482660369308	37.2031826486381	217.411072744403	314.77512331028	232.448542775414
g4550	29.7639687938595	45.2561623572605	50.814982931976	35.0046286414543	32.6936637236339	31.3667406234902
g4551	58.7093060987758	19.639242845111	56.7535620959947	2.87160581625287	10.3234228490304	13.093342013576
g4552	2.8619342652645	3.29792536935727	2.41915076046397	22.1132103038295	26.7416772351084	21.2900529420687
g4553	3.70062175585251	6.5657909599381	2.14767806058063	33.7910171859333	40.4352676002778	30.4216343452646
g4554	3.73278110072025	5.2940778344257	1.88433292093631	19.0671504417237	19.8312207515236	23.3685738685692
g4555	0.266308416512126	1.68783019041195	1.12348643065447	14.0319021638885	29.408086822471	38.0106236557036
g4556	6.30206776750154	7.26213366327308	5.35080177036594	52.7826402891129	63.7134007780156	54.1044104174024
g4557	5.38576904959129	5.0569401306521	4.92447825447428	15.4055261436386	17.0063649459671	12.4625065235021
g4558	0	3.04992087865741	0.720375020319978	8.38095316974797	10.9509375151389	8.4223793868396
g4559	105.453541414379	85.1650542661719	101.853299712107	357.932149982526	496.755171812522	402.343597914024
g4560	0.962777834335627	1.70684425857745	0.520732183276449	9.70215382041631	8.23453807165944	7.28303716088753
g4561	5.79369415521303	4.42884175978428	4.30223970468876	6.83167081104801	17.8934836080853	14.182332789773
g4562	4.34590116010488	4.67409774981356	3.69400874756591	15.5585928828672	29.7292644153941	39.656160892573
g4563	0	0	0	0	0.106387268167514	0
g4564	8.93869989336354	7.87680250684693	15.7741453724854	45.9218738371282	60.4584424215389	35.3362973533018
g4565	1.05454331926613	0.52834518976483	0.945648406097511	8.43889463903035	6.71603242104172	5.85161900597474
g4566	78.8850109972475	65.1241539420719	90.6813576239737	64.5211773604798	65.7132753039402	72.2011255661292
g4567	1.47850562202872	1.79341395223732	0.510667059572443	0.112333210317235	0.531533663819527	0.767641542903473
g4568	924.632973658051	1498.82440382192	935.537603686932	3558.20667816433	2247.93008239154	2153.5772597974
g4569	0.0268464478385168	0.185617641491682	0.100673982120688	0	0.122252279952223	0
g4570	27335.7638544205	30309.8471616244	25197.7741329383	592.168182729863	1155.4696312316	6647.63267530244
g10928	7.54298139465576	8.2878065756933	10.8539781218632	46.3408997640261	46.1979752668262	40.0170815832904
g10929	0	0	0	0	0	0
g4571	57.9576299584629	101.948968133228	60.9366410631326	701.257263961835	308.689178026412	382.459730187162
g4572	18.0926486895883	24.4793152405297	16.4555017776537	81.4727592905648	52.8427362056799	56.2746957568928
g4573	7.86278411549037	9.61647749288248	5.11019668723988	68.2422934830998	68.3155034070515	55.3482925822555
g4574	6.82623370762724	19.4340220503967	16.1871768888915	136.219375565745	108.188094321392	69.0725584499417
g4575	2.54100120564155	1.33095496118287	0.649686535179966	3.66812107667357	5.08427543751867	7.12116908831101
g4576	7.2115432552285	10.1059995759494	6.6748660721497	58.5584443447047	68.8797473450792	56.2756526142647
g4577	6.27933555857326	4.28796349485158	6.32292966553352	32.9014315412864	35.4784690676281	30.8288621051654
g4578	16.7066522863535	35.5591466015453	16.2152483860086	121.153837369047	144.250015487298	105.186339275373
g4579	12.8055265537179	14.3520552896152	5.9203517028345	114.33287564731	111.168038466282	81.0075516375256
g4580	5.35656581699081	1.17573192600769	1.19565966978943	12.8876575161721	15.4873111641708	11.3231889622573
g4581	40.4490712528106	33.2496223556585	28.9737645916809	71.9750312307579	70.9094604459977	53.6722977602644
g4582	6.41176360560182	5.24348051105845	4.36283463010691	28.6632764579284	31.3168155591697	31.8804853551147
g4583	0.105000049819899	2.17792630011742	0.590624122890878	8.71557693837728	9.16444632154618	8.7396166083817
g4584	2.39827547420494	2.38244150332411	4.41922739738263	12.2963745739291	26.4242123295124	20.8541975851657
g4585	3.61590623827018	1.63694083793722	3.75310961172849	15.8458976387823	29.5015280487973	26.3545879613761
g4586	984.148656609106	1199.72149072456	889.64382969233	2691.1614625971	3227.15034444296	2959.89639173113
g4587	12.9923789785495	18.1731425820652	10.4183966902733	153.11052284271	122.54550402168	99.2491714033044
g4588	20.1309757195042	41.61723840888	17.9949503015635	169.197969666845	152.633774416694	116.448025633034
g4589	3.72163488567633	3.06549318075604	5.54213495352404	6.00279399707179	6.96455840842187	7.17366339449069
g4590	1.90235384379581	3.99286488354859	2.2293165422842	43.6937951780234	39.3953999418282	25.6780979478509
g10930	0	0	0	0	0	0
g4591	7.40684869450085	4.95965397901346	8.72680209620996	21.1679192078465	22.4100412335985	19.2541989526991
g4592	38.2806542464825	60.1864606232353	41.3121157888016	148.792612307789	167.04250222118	163.796771918092
g4593	25.1628396451959	35.6423658770788	16.7953969484334	102.231448374047	89.7935307426443	85.9416205280927
g4594	0	0	0	0	0	0
g4595	23.2236475077578	31.7162098991614	21.7986459093267	29.8499386010039	29.3262720874165	28.6196924650175
g4596	97.7583203259726	99.9876209257444	97.4433338547947	68.8255447108089	59.0777109051973	69.7303608322231
g4597	32.866613034618	32.2955048187915	35.5831898067395	27.1269918661202	28.0342398030407	31.0540409354332
g4598	0	0	0	0	0	0
g4599	0	0	0	0	0	0
g4600	0	0.261778986840387	0.212972750022162	2.41854643063949	2.93103781176062	2.73122407795884
g4601	0	0.049959928952035	0	2.12793496760366	1.44781211283782	1.09595723337186
g4602	0	0	0	0	0	0
g4603	0	0	0	0	0	0
g4604	0	0.836715379229995	0.972453777850941	7.18751180604967	10.2343621580589	6.33144508951648
g4605	4.39408887245008	6.7513207616478	7.61474136332477	36.3291713558208	43.455248569287	30.3756603728085
g4606	25.0313744399992	27.7660098225855	19.8915830231492	54.8025049098915	63.1243084805517	58.4620362101593
g4607	9.42533398497933	17.988866910887	7.45557184354087	72.7079117815773	58.7924291898031	49.576803821975
g4608	0.509390727322501	2.70016333552163	2.10123263277564	12.3537585229352	12.139465617793	9.73602850081768
g4609	28.0084555628466	55.6717420299818	21.9100917962409	138.007354611189	67.7351170495076	105.210403563811
g4610	1.09085654871257	0.963730033796012	0.818140808362461	6.11520619086888	5.40905436078673	7.06197295333566
g4611	0.743208667139129	0.481741944829406	0.304831082555444	6.52107483647843	5.81692699876604	6.50108355585844
g10931	19.4794270507203	10.2769170747042	11.2211841064759	71.1469312194157	67.6862680274293	69.3110866218691
g4612	15.6441418552209	15.698854301181	11.06087549695	70.902663741092	64.0662284948739	56.2649123908403
g4613	114.505177919312	148.434734166352	114.649948962092	145.282394008899	122.916072826032	113.202481376119
g4614	1.95928781757262	0.73961381510359	0.791736521401809	6.02248869450864	5.20457377189308	4.93614260860152
g4615	1.71573738882051	1.54730758186861	2.79739243497905	6.35351094260882	5.26532052904534	4.82926887737782
g4616	7291.61911111462	7036.3695840604	8546.76183843683	78.6772985111835	71.8917242698855	182.424813373243
g4617	7.92456376000739	14.1284499006728	6.65830261205649	0	0	1.42889494652001
g4618	331.921390365114	507.43243932017	269.497009884942	1743.39021051332	1978.52559556569	1707.37205804351
g4619	22.4895266436126	25.2275877443954	14.9266477266259	44.8911455799453	32.2491770624598	47.1810197069791
g4620	6.63504056630867	7.86745032714174	3.69614307276535	25.4723698289371	21.3106270878738	23.0628620211801
g4621	1.59495808803229	2.20552350433406	0.934543923438986	13.8721928509717	11.7116783188288	10.1779129646202
g4622	7.27865562745317	5.29736608152782	5.38715232587114	8.94039786982578	7.07486346488729	5.58989658000463
g4623	2.15653948476253	2.48506975269808	1.07826762948283	13.5420827225128	12.6300782465536	10.0607677686117
g4624	0	0.120626264302724	0	4.30669742222852	1.43005289186476	1.35534267067752
g4625	0	0.649513318959698	0.726574272265463	5.39053122271457	3.95701330995461	3.60548842051771
g4626	0	0	0	0.305019878374239	1.36309826292053	1.04219370829958
g4627	0	0.064800323602448	0	0.365298013528885	0.512148774548209	0.346708998282101
g4628	0.228772363739646	0.615122359656472	0	5.55920224545095	4.51435588960076	4.13746263350533
g4629	1.08021915660478	0.843238922864669	0.686024934605286	10.5383592504032	10.3934951477551	7.47650335603961
g4630	4.52902084049595	7.19586397237652	2.3159720279446	36.4541514453249	40.414851850374	28.3468166045384
g4631	10.5997861866036	19.9475393774313	9.6513151832187	82.0119935219992	86.3515254780043	74.1922276780842
g4632	0.15887951897014	0	0.44684777149163	6.88062615899847	6.02915996827748	7.39577985918173
g4633	0.188701328634568	2.12012146409625	0.751855382994713	17.7403214781881	21.4109056143769	17.451602997513
g4634	39.3554342490859	42.3275035233771	29.8318652612031	85.9955937625254	85.7782162188336	71.051837414701
g4635	3.20773645742835	5.52336761150852	2.45419010987697	15.5151785497393	11.7529693671429	10.434249584885
g740	31.1337484536474	6.61863399234696	27.2755257476163	241.495665999367	201.093232808472	106.336717962723
g741	0	0	0	0	0	0
g742	0	0	0	0	0	0
g743	0	0	1.15644203262034	0	0	0
g744	7.00875332547823	11.2581190311625	13.539610574756	43.6898436841778	42.2325216058921	39.9388708475625
g745	5.9142356828693	7.78882136188109	2.48186189649114	45.2901036448166	34.8833650802414	33.7902399748202
g746	13.5623553869098	12.9993763841301	6.06026959141361	53.3370133127904	44.8287000926164	34.9323637287641
g747	4.48212864560009	7.78974926530758	3.51313698258502	45.8223143660879	35.5232589015856	31.2588272847162
g748	7.94955350475679	9.58246942543817	7.15850660402652	44.1288343167589	34.3943100666044	33.4223946396875
g749	0.815025163716002	2.70016333552163	0.382042296868298	10.074195938346	10.1291082543369	10.175720110532
g750	0.15961964095292	0.275904483412908	0.374107800407718	1.78577534771005	1.02973183992366	2.16510078802996
g751	14.782581764796	18.7211733196851	13.218309896665	32.0096068542055	29.2518702855782	31.1327238049249
g752	8.4822977331428	14.1561766690212	8.10447836118163	40.6518545758415	30.1907087913882	33.582739990162
g753	6.57079598799189	7.06215991388548	5.62702279752777	23.2575313837813	21.1466764138747	20.6067462720818
g754	1.91204253697723	1.78364469111574	1.62181861675424	5.78322012088481	6.01196431274351	7.85914675291011
g755	1.87976045844184	1.52431076150371	1.72963731033068	3.99498055567587	2.95900472699803	4.57148670528655
g756	1.93344919323538	22.0942695828961	8.76092448954802	102.513870365065	41.8212019692988	77.4349006404578
g757	19.5770497966804	12.6762596756431	13.8670497664067	9.68945250879035	18.5845393082631	15.902078614073
g758	0	0	0.109948852692559	0.0423252055987071	0	0
g759	0	0	0	0	0.135682313025236	0.0551116564225809
g760	0	0	0	0	0	0
g761	55.9800579550267	66.541062642846	37.5153861565828	4.2548613234789	4.47399506427918	5.35891075218315
g762	1.30949106718065	1.50898078401624	1.08599406950301	3.08998885851805	3.32557947530006	3.1984202367735
g763	2.11577284535275	2.98277294234872	2.53216998603096	1.59212094824267	2.4770117907771	1.72080626359974
g764	0.348457792453155	0.401542344221271	1.47005343129704	0.817414500329607	1.58679315232903	1.55760486584159
g765	0	0	0	0	0	0
g766	6.29115194573335	7.18116288236367	3.44974047452179	8.9103843915837	9.99991181158854	9.80682015556549
g767	0	0	0	0	0	0
g768	0	0	0	0	0	0
g769	0	0	0	0	0	0
g770	1.7527741516074	0.35643427746823	0.869941348510786	1.78606424267684	2.11280632870289	1.33495135667535
g771	1.33500063342443	0.361970944370588	0.29448485679153	12.3565673188452	9.65531509419459	9.58664947854978
g772	0	0	0	0.169300822394828	0	0
g773	14.9642628378735	19.030474051536	10.1741621449112	87.8189732283495	76.0221326979756	77.3008741560003
g774	29.6402901371963	29.6500837732958	17.7959637944132	56.0339761627551	56.2873497347635	61.9786364344988
g775	1.86575158066277	2.22412014723395	1.64191178715799	1.33119541286159	1.33464973417382	2.17725535560975
g776	334.222987804746	431.580753922322	215.514527927192	70.0468154544905	85.3358528267707	191.126097716855
g777	2.36877692805409	3.29831469497165	1.15662709295521	9.01181450306144	8.98903466033727	7.88046416969069
g778	36.0369479246886	36.5150041096583	34.2376222999865	11.8095851197075	9.53603361859699	18.6432111081625
g779	2.75397335095476	3.93240216545176	2.02057431442109	11.1920711254305	11.1323505226733	9.92940647310739
g780	29.7109788689342	25.6067635846471	28.0854616942756	92.1362117517546	95.3198123010353	85.045801912636
g781	10.0587040566132	9.89480836297046	15.295026883304	41.7020957401495	40.3120571425514	35.1682079617841
g782	2.50997899336401	4.9958819963601	4.81316051312572	24.2928359570337	20.0022233380432	13.435377728324
g783	44.8535425020437	53.4147176729357	34.7648356402224	229.08287379978	230.740909650674	207.871081277187
g784	1.58503083855619	1.8710453722834	1.48596349935546	14.1751077061237	16.3428555111536	13.9675612121765
g785	6.45697542548246	6.69657615519771	3.14776935177228	30.4800501640106	34.6961492666919	25.9564824030472
g786	0.0819084053973552	0.471932237232171	0.153577959179328	3.54722320706933	4.91105105113254	2.57553677225846
g10932	0	1.04519110187007	0.850325023985543	3.27335670946471	4.35979197000206	2.98251317110438
g10933	0	0	0	0.413348665262025	2.60782161524826	3.35428883797602
g4636	0	0.0615670434227001	0.25044222813157	0.539888355407209	0.527144121550747	0.658819177608815
g4637	10.2795048773681	14.995897865838	6.15128740755499	52.5687158362546	52.620199163138	45.713360119879
g4638	1.39414623110779	1.071021623375	0.958473655728129	8.68751633018272	12.379784279529	9.62709947634957
g4639	337.354660066352	441.514059396025	314.517189174774	1011.42754617357	1056.42557290342	1014.05447817549
g4640	0.599388039496681	0.518024744367092	0.140481296479633	0.757102912393199	1.5921904079492	0.646718417203755
g4641	32.5442840004011	49.2700346929583	24.0925423462571	576.477663641086	362.32065696002	299.525234444711
g4642	11.3870084377522	10.7849764684621	6.50754558062785	72.1131907557037	60.9103433681384	42.2682988579407
g4643	27.2478375033791	32.1311453109672	21.5976422887621	24.9996083776944	30.8090074378979	25.860740169854
g4644	7.3568349805497	11.5603440024667	7.83752190834647	65.0241555324507	62.2311298419909	45.2761799380565
g4645	3.00320972070988	5.31925931375536	2.72860533696112	22.8408868895597	19.880701041511	19.6821664947947
g4646	0.828250169170212	2.9693283467034	1.03531068273978	11.1593038045135	14.2484649219876	9.13511475975008
g4647	3.48676672976053	6.39895054830003	2.9056332477898	30.7596836517538	34.6961492666919	22.7716379364156
g4648	3.08304013685862	12.9954568467192	5.32431875055405	46.4969943323912	42.1798508625215	39.4676885990756
g4649	1.87848820094036	3.24698961596185	1.076215089579	42.5591758976766	40.9491975680984	37.447950907242
g4650	1248.23968534874	173.589992408479	1308.30366230385	304.403325477093	1177.07336349817	1087.04304426298
g4651	34.8543408618377	72.3244850098301	41.7919776325737	191.05036244332	106.866490096197	131.428436667708
g4652	0	0	0	0	1.01321207778585	0.925983188269013
g4653	0.539134871190633	0.621267438174519	2.3587104394937	11.2202122174076	11.5934843515881	6.64808442859804
g4654	3.15731986782717	2.37889528206695	1.30922262011556	13.2352142913108	14.5620060701036	12.8403974458872
g4655	35.7142918700099	36.144876574238	46.8749162265545	96.6118211893171	88.6239156376313	79.8453016237119
g4656	10.8138355764392	10.8486007108296	5.72496055752643	32.8740081415879	29.6427231519551	30.2773072846332
g4657	1.4984700987417	2.41744880704643	1.12385037183706	32.4472676739943	29.1143388882139	27.7165035944466
g4658	4.16148165441858	5.40881885135337	3.13017810492717	15.9382458704686	13.8332940354852	12.6398795873318
g4659	2.74255564910018	4.44791470229293	2.85682320311348	22.2881521403342	25.2091570223023	16.0951087506855
g4660	4.95265224284329	7.10222647380664	2.88904148049335	52.906416366252	58.1371109986074	52.9962893104293
g4661	5.86649767277394	3.53145204777225	3.94017728320388	30.2093090529361	65.1251987987397	53.9310276670205
g4662	3.54465685426485	5.15021702370761	2.60069422628262	13.1261440463493	16.0245490383253	11.7824920627587
g4663	12.6762088447329	18.1194629924376	6.75370459302085	35.6981165673699	39.5869605674538	31.689202442984
g10934	88.0823864256587	117.116517064537	121.778500296335	78.2482256725777	94.4729626803301	66.3623222534806
g10935	1.45190746855481	2.67694896147514	5.98910657195091	1.67674769298381	2.64465525388171	2.86456067281211
g4664	0	0.124820855158351	0	0	0	0
g4665	0	0	0.436557958709075	1.00832732160181	0	0.358881114869581
g4666	0	0	0	0	0	0
g4667	0	0.218551644917481	0	0.821358879127677	0.791688772956288	0.233868652715749
g4668	0	0.180406627391525	0	0.54240208649065	0.451516682851264	0.444015629721981
g4669	0.616066216965553	2.23117278595552	1.15512189331369	19.5018820396077	23.5120720516333	12.6431235774234
g4670	14.039512155903	17.4800144509511	12.7081542046191	73.7884146155526	75.2616158219062	71.4623851010149
g4671	54.4015430259431	70.4660197903437	49.3038736885773	173.639037363236	190.264841591713	158.928073741274
g4672	78.5441041686223	87.5899585369991	85.002561376583	89.4794339946399	90.3792308681302	75.6523917476871
g4673	17.5069186306344	18.4779074980195	17.4294202354233	63.4049441296767	80.0162668543511	58.2202528681198
g4674	17.5920389592276	20.2720349962322	14.6100548338818	82.827058615816	75.2196239869713	77.7170760788284
g4675	19.5874711840093	19.9531654965745	13.3684228872524	56.382238687721	51.4961949473446	46.3744425994888
g4676	12.9003033467631	50.2299237596212	25.8429912617711	101.14974920449	97.4958971863633	73.5926260168638
g4677	1.78059378288854	1.2626781244	0.513631815509811	3.16359058396412	21.72634506037	17.6074582527972
g4678	0.491842338630052	5.9510880919875	0.69165193338537	9.94014541438727	15.491479399831	10.1587395391384
g4679	4.35026068477959	6.7768137796278	5.13571435594194	14.1298187740844	12.7175584935879	12.4173990764044
g4680	7.33522647344402	5.16552985925877	6.68574019519522	14.7803896613689	18.6344663304976	24.8111694053096
g4681	8.91210792597997	16.7135814675016	10.3209871164586	46.0375200617165	24.8674022491003	30.7868749616071
g4682	0.488466440846424	0.0625422341844113	0.966754603123303	1.09687982661401	1.23575496287504	1.20465817101101
g4683	49.7874814542406	34.5374794625982	43.6568478177959	84.9232302937432	110.540216948993	68.7235715630978
g4684	0	0	0	0	0.436516088445888	0.41908406079226
g4685	0	0	0.0721333603181349	0.12495598217268	0	0.0355791943596377
g4686	0.48488230553623	0	0.0909152541368191	0.769959376943273	0.883215056485025	1.25560990811823
g4687	0	0	0	0	0	0
g4688	0	0	0	0	0	0
g10936	71.5095991469084	112.936901877017	79.6101399267624	299.895047102532	313.765348870858	356.454320647478
g10937	34.1812387120308	18.8253654045058	22.3842691725616	17.4152180924088	23.2716730042061	31.6117227304095
g10938	32.8944156075778	87.1828737773224	37.7771063989311	274.822300375432	259.329604885133	292.301203334084
g4689	4.13336734579486	0.414178292116346	3.36958634213385	2.46455528474849	7.22887847804906	6.09407739288154
g4690	1.39087070398624	2.31095326488579	1.0916696343175	7.91456040136151	5.25352694076629	3.86891458397665
g4691	0	0	0	0.660107521481615	1.24938784680711	0.56386481215274
g4692	20.4246696619535	22.1601424163837	15.9761776449042	26.7730792238794	21.1847638548477	18.4367963874476
g4693	52.5337505436366	87.4934137811654	47.8717876529009	189.687261280849	187.383626125651	158.652053843288
g4694	4.28795581130348	5.40859882478426	2.17294632209759	53.0748773342971	51.0586922873854	42.6928939338961
g4695	13.6315173373794	17.5107378806059	20.3215357181473	36.9367468694091	29.5109030829888	27.2802699291775
g4696	1.26369496160947	1.50642210528116	0.571929788635182	8.42922886438957	7.9704012409801	7.87192565985105
g4697	0.727752557689775	0.677346445868148	0.970917976105118	7.11151043319695	7.44590174576541	6.48884417620802
g4698	0.726752112304106	1.20967391208843	0.075703196688946	7.46040764576614	6.55762318057944	4.82930500702191
g4699	14.0893913004486	22.1999564574362	17.11749861804	87.8938242602936	99.0765533293365	83.0567347946182
g4700	3.89408708225739	6.01708523561879	4.3144630288605	13.2869442670882	15.583315159334	12.6593111782562
g4701	7.88172971833139	6.43818782905409	3.64778706504313	16.9227564598014	16.4818235144453	11.9949423676128
g4702	0.61759375097672	1.26520685228598	1.54398135196307	10.9956815500844	10.5203609198138	11.7195047753092
g4703	31.3064983706343	53.5557889561055	30.7113726611628	637.830084348486	381.145888425992	379.772953610267
g4704	1.30326527763779	3.28520182574059	1.2599903287266	27.3090979992479	24.6972451115764	21.8710739523289
g4705	13.461959287995	8.5048098467314	11.1813751957356	11.5918065667738	20.4341771827782	20.2403177005159
g4706	0.480992875277918	0.870992584891728	0.579767061808325	3.79411800415228	3.65054351555197	2.64782774423329
g4707	89.0822705281799	48.1077090169052	76.27717952313	130.722944954657	154.801184406064	138.092275467944
g4708	22.5281356890372	24.8063212813969	15.331617856709	165.014021132972	148.688872415074	108.545807069312
g4709	5.50389931238204	16.8489252441359	6.1501784680548	78.529875152105	52.1943954553946	46.3426735564244
g4710	1.10913949906863	1.22698308031359	0.873445643973065	7.14101296825247	5.3201286742955	5.41602251507193
g10939	63.1095779665159	89.6777902094172	72.0507669413488	70.5631320797353	62.1493984662203	40.8199895875726
g10940	0	0	0	0	0	0
g4711	0.0806109228149943	0	0	0.0349103287709537	0	0.0298204539927704
g4712	0	0	0	0.0705733215737478	0.123679977789332	0.120567669408944
g4713	0	0	0.248376725219145	0	0	0
g4714	0	0	0	0	0	0
g4715	0	0	0	0	0	0.00983831184196957
g4716	7.24168104793691	4.31388327418613	4.54521992920432	19.490314974564	21.6119648448555	17.8216290753976
g4717	19.6083041013379	19.3088483328136	24.3989214974811	0	0	0.512888825666793
g4718	2.70157815436743	1.55657019113371	4.87549477177869	0	0.153779231253963	0
g4719	0	0	0	0	0.0746577320473785	0
g4720	0	0	0	0	0	0
g4721	0	0	0	0	0	0
g4722	0	0	0	0	0	0
g4723	0	0	0	0	0.594256049974509	0.275858127904104
g4724	5.2211205511698	4.53191920160023	4.00482893882373	9.29898168124101	11.1159256449435	7.27430240775622
g4725	0	0.0315039871131051	0	0.0986650072001776	0.0207492898908273	0.151703628716413
g4726	3.25300787258483	8.05943771589687	2.59223556890108	16.2010439670975	12.5914045236235	13.9893789265705
g4727	36.8901586324903	26.9867218641453	34.7787506450001	107.703994956581	119.228097040421	118.195613950646
g4728	7.44630039847982	10.036795753902	5.33932539133838	10.8860882191312	12.022162975818	10.4786668188847
g4729	16.2230349571089	18.6944749927981	14.794272775033	69.7251591772159	69.0626866621636	60.1049148201217
g4730	3.16292457765172	4.27864183508017	2.51400441873987	46.8006077230135	40.652508402561	37.0095969668562
g4731	2.99276724277805	3.4486896272675	4.02558935405814	18.1263854240569	22.8126623133885	18.3717148340338
g4732	30.3642654556169	16.607829851165	19.9784772961173	79.9752891915793	56.654885528632	48.1888530858558
g4733	8458.50585493372	5764.18408363087	7278.52402082052	20.7161347395034	23.17346435332	35.1405017189525
g4734	0.469077797533093	0.463318089486082	0.502582369674202	0	0	0
g4735	5.03034248953662	3.39105309782167	3.98496663226566	17.1012264400515	21.3989300020165	21.2295170758234
g4736	5.98806109361247	8.05033923123228	2.40591268922401	25.2122620340648	25.3204649341824	17.66859831079
g4737	83.584366414351	108.211350372758	79.8703435181778	18.4736625901537	24.7228451388699	23.9094388716652
g4738	37.5119028791053	34.1513382882547	27.2012574877096	1.34629993695726	4.7187901203333	4.98338264224345
g4739	44.4997887380581	60.3099826405447	40.1081070495392	93.5684314757694	79.5247144331721	76.3519478182392
g4740	5.58492784675903	13.8974753860204	8.27114052202211	15.7155488004012	16.2177756828589	16.7179256982671
g4741	5098.06596729195	5440.19560248945	5005.03137773856	972.071294163681	795.632955146483	753.823331846467
g4742	21.1161157882998	22.6762614933699	14.7419402468356	211.822041052331	294.133517696468	256.505257536741
g4743	1.62804955295662	2.58897510821159	1.251560641364	23.5255880582667	21.1786036746945	16.7630560911572
g4744	8.69999180253831	10.3173616300733	7.6811063519702	25.3924975966748	57.6315362864174	61.1651080842805
g4745	0.783064775976793	1.80471593767039	1.86867364458503	5.24099772318727	6.10523427203234	4.95966741836176
g4746	3.22443691259977	5.49916522857613	3.44611019758256	27.136962231288	26.5767943439801	24.4527722740717
g4747	1.95583499879127	6.02757700341001	4.17888345120919	30.4991873230538	30.9652853984916	25.3513619543872
g4748	2.81080211490533	12.9560147002645	9.78759532816693	34.4895865794121	36.8753786278546	24.7571894085812
g4749	0.477481978378079	0.0786031795257299	0.19184506181492	3.69257226681487	6.10885530110302	5.46728111159644
g4750	1368.45908679963	1405.72759497869	1784.73036349382	375.907510869726	313.5930959344	320.358030947041
g4751	206.477026354727	192.451034581323	272.231177365472	91.1606778518514	88.1817966231742	91.4858251718934
g4752	95.9842828302782	104.40100949753	84.639439983769	234.9352165283	226.358447411785	227.830228966045
g4753	0.133673665505437	0.154037700318953	1.12786934260761	0.964838561957523	1.11598261363409	1.89558298098474
g10941	0	0	0	0	0	0
g10942	0	0	0	0	0	0
g4754	0.111330377733228	0.256581209123339	0.347906748682412	3.2410564386854	3.91494905001515	3.98117055962398
g4755	9.43394397311142	13.6895639447293	8.25468480116489	67.8911835268267	61.9471389719567	59.5869027581874
g4756	23.0482172138298	27.7545888261911	19.122780247926	111.959563865428	131.457451764837	93.0070986499239
g4757	19.6556442850688	26.8253940293259	15.7747404256516	74.9126096580346	76.8871900089768	69.7743907001482
g4758	7.12112996107662	9.92350216858	6.27681425453694	36.1161612547154	32.0149365641651	26.2265528158735
g4759	19.7960374769776	24.2375308678396	19.815330716079	40.5585421774531	36.77848053668	34.6451661613366
g4760	2.14025208714338	2.39376284200494	1.53436889406659	14.8573912618202	11.1794581858821	10.2461107715221
g4761	3.01331255565753	1.42051288995	2.05452726203924	9.09532292889685	11.7987567672344	8.2759276200198
g4762	36.1995961231718	30.15217966607	25.8216721797205	114.524675381476	156.93055276359	126.635511389379
g4763	4.0942551431907	6.69784625024848	2.77595438128993	25.3037147626379	26.3572060775374	22.3807809572426
g4764	4.71416784185033	2.94251252883167	3.62155413612526	22.4478602368812	31.9523204988887	24.4228885070131
g4765	2.82726392579402	2.1514918028462	2.3504919362202	11.8975559901873	19.5549405215016	13.8794431042442
g4766	6.29531057317438	0.882285454268255	1.94069582485712	3.37720112921325	4.60571272213938	4.75556582868505
g4767	1.72041922633775	3.22157926796773	1.61288986418457	36.2055165751882	30.8886604613282	25.656320806349
g4768	2.09785813823838	2.07209897746837	3.65251370847046	22.713087371796	18.1964618051337	13.3039217253344
g4769	1.71884053822223	2.27054836975038	1.72931788456005	15.0086698065288	15.9089172083015	12.3034750104897
g4770	38.4652440572483	40.351119700584	28.8488765126794	177.017499266416	172.040796067192	165.029188464366
g4771	27.7136582663569	30.7950390674786	30.2233818704077	74.9104906386074	84.4561742802542	69.4808647787022
g4772	0.212914351229662	0.0981400095652651	0.399213626284293	0.076839359377106	1.13115432876258	0.498835829674147
g4773	6.5817551601309	6.20544193194106	5.6094394286978	28.9356095621289	34.3312581327532	29.7339897194937
g4774	0.448886675867602	0.646588381797353	0	8.99101035045111	7.83580170200324	6.01956465620002
g4775	0.328652020946049	0.589118963280231	0.171172592158132	9.72588117867242	9.86649004485462	9.07335601031798
g4776	5.78021447460475	8.63434509701761	4.48233345976876	42.1843762266595	43.0300372625242	36.6939185525146
g4777	5.3477193003649	5.20380309678665	9.02425863605467	9.09223705657868	19.481784136109	10.6973955067645
g4778	2.11096975160237	2.43255786209047	1.7208958818755	11.9906173750273	12.8867911143388	12.392741669667
g4779	8.83041167879637	14.3502743061456	8.91530201359292	76.3206429264034	81.7979054515573	79.7116061451271
g4780	27.3851648055251	16.2426041296166	24.4464974248015	40.4045283942024	50.4323582694192	50.9634382089909
g4781	12.7012004250841	9.36711630012059	11.2722932888583	30.925221762565	30.0758735050173	21.0913307857752
g10943	44.7655857562803	63.0486245321625	30.3099726291621	114.285905759483	120.801027080532	96.8565139184753
g10944	45.9151217855774	101.344826099846	57.8221016310169	223.412657192651	237.692798701376	256.048755739311
g4782	0	0	0	0	0	0
g4783	0	0	0	0	0	0
g4784	2.78728440275707	3.85428388975949	2.50855104689878	16.094595534606	23.2698110055482	16.7038529146315
g4785	0	0.636170738696428	0	0.398475217049052	0.335197980620883	0.204226868590659
g4786	0.496434556215458	0.0381374731311252	0.992867166877303	2.24547071119322	1.93410637771807	1.44876585541009
g4787	0	0	0	0	0	0
g4788	0	0	0.153211716033431	0	0.0620169554765585	0.151140870157316
g4789	0.290709979563577	0.33499714803528	0.327048086148286	1.38488168477353	0.838421532692704	1.72068067563714
g4790	2.24076400596579	1.9365938672252	4.20142427836635	2.83036838093588	5.73969457688497	3.45386402648327
g4791	0	0	0	0	0.600710914259947	0
g4792	0.161289302469164	0.247813789843672	0.302416849534607	2.25071807219819	1.87698597255099	1.7568281689102
g4793	0	0.307409147608845	0	1.21948583293783	0.944846556966391	0.493430487866533
g4794	0.754182309418054	0	0.0707044529604022	0.707666258539205	1.43098550971223	1.53447348586716
g4795	0.420000199279595	0.241991811124157	1.67343501485749	7.8819130573151	11.9536256367994	8.80435450918452
g4796	0	0.497361755963366	0	0.25960841642594	0.491361770402796	0.75397682509549
g4797	0	0	0.425006259691414	0.572626899560898	0.516101411176476	0.139753924776115
g4798	0	0.372109921084633	0.504555860654598	1.55384472072322	0.735241853304288	1.26093161553235
g4799	1.23354058528417	1.53991489008857	2.40925423462571	1.70650996453427	2.49655455966434	1.64783852703517
g4800	0.757872343505689	0.476360555812098	0.516730130750822	0.646480636989903	0.313742613898836	0.892055296652364
g4801	0	0	0	0	0	0
g4802	3.29539453152441	0.612487029706696	0.89693022178413	4.14331811001532	8.55205478685431	9.04469480275448
g4803	6.08106852550948	2.01584669566513	6.32575666141595	2.10442705794868	4.23594903508688	2.87616748266954
g4804	0	0	0	0.152981619411409	0.482581422615529	0.326692808690557
g4805	0	0	1.12188788573956	0.518249723500816	1.36235151320449	2.06588514180105
g4806	62.6115297076056	55.801111719675	116.361006174815	19.3768289181757	78.9844869728516	33.8367351705251
g4807	3.46694936842094	5.99266399048609	4.22533626308724	25.7746940900403	27.0363597181188	29.3378956849886
g10945	0	0	0	0	0	0
g4808	5.39449235547013	5.87094710282704	4.68270988265443	12.8346969910466	15.3911739435089	12.0104848909269
g4809	0.727752557689775	0.419309704585044	0.341133342955852	8.14187131982492	6.62802095486108	4.71131505347019
g4810	5.94140528398665	12.686212439188	6.18440101025893	52.3755622071994	61.8037837230972	48.3216567638872
g4811	319.128571846083	164.317612974918	342.903833108723	28.3742749447504	40.2132080943558	135.187191419476
g4812	11.4731790626769	12.5532910994993	10.375818688016	55.8352728457735	52.7298639557064	40.8351278380279
g4813	1473.61483582131	2500.77770522792	1123.10467751331	2192.36491222258	1956.01239601027	1349.77578452203
g4814	3.00685353165223	3.07633247588877	2.31836383430358	5.050526317173	5.18267118301013	4.36614489646362
g4815	7181.08510923211	2492.57543136395	10126.9092697608	3523.38046406261	6049.85643739189	6573.76765009615
g4816	4.09861101893228	2.06291919281414	3.26828255476264	2.55027791296518	2.07378787323172	2.41081925093279
g4817	3.90602131577471	6.0929119840248	3.70654497634724	24.995622843543	33.6580788786999	36.4763572142596
g4818	119.1947212948	101.063333827067	124.668461898089	60.471954008377	67.013729690412	66.4557378399687
g4819	1.15716752840916	1.88905708843309	0.904035360084693	20.1150738131334	16.6866334311524	19.9172285523445
g4820	177.973517279806	170.377917925686	144.668808872576	220.548301027961	290.312719686026	296.579071410614
g4821	8.89168160052879	8.44623551637846	10.7015383887524	114.568122539566	175.869574383134	91.6042053085908
g4822	914.875934085759	875.890051769062	770.823683409676	1205.68638798617	1129.57948491956	947.869315358856
g4823	6066.98035846921	5650.58968136658	6203.2079111329	50.7405487351004	58.7646662985507	246.051323484718
g4824	2.13859324771874	1.64292637372087	1.069294528544	9.57036885374704	9.63043324419756	9.84518910849988
g4825	16.8155483875155	22.1454317202462	12.3864287817174	146.152561629602	151.400719249362	124.164898374457
g10946	0	0	0	0	0	0
g10947	2.16410628997223	0.6234473239225	2.28245138017172	3.51455141437264	1.23185257878175	3.50249079632981
g4826	0	1.16513106437975	0.631935536951005	3.28408902654493	3.83691786833659	5.50664829337099
g4827	8.95167333297656	35.330189786	12.0987222812844	28.5907992417397	26.7229170936495	26.8139405286788
g4828	2.4162704547205	1.59106771719644	0.517771225708681	39.2656247862004	30.0227871618466	16.4724262531025
g4829	0	0	0	0	0	0
g4830	0.281168076514444	0	0	0	0	0
g4831	125.851304451722	128.14223078169	88.4890250456633	62.4621284307558	99.6914168537041	60.1008686140538
g4832	2.3665666314577	4.01626384058906	3.42882561646187	33.4177429493671	27.6277359443809	20.6928236965488
g4833	1.41677708876436	0.544203636502029	0	5.90841721524616	6.57113805424668	4.80433543928854
g4834	0.698335929169027	0.965665691945176	0.91656411099891	15.6255342924629	11.6601987756062	12.6584585845615
g4835	15.2617943583862	17.4006939661951	14.5350137642776	130.323996061977	99.8965026574252	78.6131196503876
g4836	1.58355048727061	2.81539152440354	2.29048818080613	17.0141551500757	14.6282493730332	10.7118430793185
g4837	0	0	0	0	0	0
g4838	0	0	0	1.0425679449349	0	0.148427177718895
g4839	249.325879168462	224.062738427016	246.266531751468	57.6588308297844	44.9913603905109	62.8787662425765
g4840	4.50243581920502	4.23836490414926	2.61584667053747	8.10160833952649	6.06427117746967	4.37901378607552
g4841	2.70888478044374	4.10731593430218	2.77348268341101	13.3264813608628	13.5799929454696	13.295400470184
g4842	40.1804750906896	31.6394439958063	35.5502334946399	66.4018712301078	145.424811356669	140.846634310917
g10948	0	0	0	0	0	0
g4843	11.1879262386239	12.7821200179087	8.33714023516988	57.3552995157929	55.7370320297155	45.3376682393576
g4844	3.59733392161011	4.59964252884337	4.25026633912876	22.4793509021981	27.5641285725164	21.4502175692682
g4845	23.5063892450668	25.5924969113466	17.3184150939273	35.6935231701416	32.3332801218517	29.6256450905635
g4846	2.64469319796877	6.73677677034739	4.76304831760803	15.6228724197156	15.952087783908	18.1081156817051
g4847	15.9840262433159	20.2200296556205	10.9223965301621	70.3504002686524	45.2360330761571	46.2526576085571
g4848	193.978696689205	300.663167908937	305.759175291369	155.294132262977	72.5742604553587	82.3287585063571
g4849	37.3506617010128	66.1115293127032	42.9881593277718	92.9976065352844	82.9189423448725	77.6468415880446
g4850	216.939708610702	222.523493581108	305.830884546809	22.3524484450724	27.8105939710243	38.6868181244
g4851	0	0.683394181991971	0	0.570739118573335	0.750166634514525	0
g4852	11.4620443202016	28.4718295873604	11.6746638361683	128.60336912789	85.7639093490089	65.1298646610943
g4853	0.854590666764567	1.89921898558339	1.14453882880081	5.59554800929083	3.56730071804769	2.52158736779089
g4854	1.28150550563805	0.843846778595013	0.858149326669886	3.63382430792462	2.84836200317893	2.65252451437266
g4855	0.765657950006135	0.983133575285321	0.389664443140144	3.99480945092083	3.12135731815875	5.00391321827924
g4856	0	0	0	0	0	0
g4857	0	0.860447880474152	0	3.23372769361163	3.68362696076382	3.14590145317759
g4858	2.06139803690536	3.12765519120211	2.12581255996386	18.1770490002851	16.3752951983331	11.8410856722113
g4859	0	0	0	0	0	0
g4860	0	0	0	0	0	0
g787	7.09951415990889	6.90277288860955	13.1035697940794	28.1304582830642	35.0797347075138	37.1607194115568
g788	3.54465685426485	4.75063122014409	4.29836962399489	13.9048136084208	14.4454876367385	11.8300021113988
g789	2.78083620749696	4.19896425253773	1.70805337529434	22.6325745620825	27.7281741847048	23.2348070150983
g790	110.034136715489	32.0328991221025	112.658085337427	15.8842323704353	41.755754078893	35.3490821617512
g791	57.078998804923	42.1748491748601	42.9825819750704	67.8064482387318	86.2402362351916	65.6593757559
g792	25.2233225812732	51.0959700628596	27.2126086871063	349.090053284349	375.956929034165	285.357102427182
g793	3.71159516765252	1.30170320379423	3.32832610120977	17.0056961860626	21.0659038590201	16.217708000648
g794	3.38981531287941	4.76863777527017	3.42557775544212	20.3046246594805	26.8633547372876	25.4599330976608
g795	7.77372050259533	5.05077598704712	6.51254563824808	35.8146832250363	57.1164684557157	53.1807532550801
g796	48.0517021622123	77.602785319827	49.9202816482002	104.151984165692	117.782395690535	85.982198872307
g797	19.5871292936032	6.3750322722548	18.8535095015073	13.9758444526285	25.8166437419835	28.6239923157717
g798	0.748390444336333	2.55938450497071	1.69745483886264	11.0823650360835	10.7186796721145	10.3894144223592
g799	10.2879376131165	9.32869498633831	5.21774502002614	22.0944864688069	28.4804855170896	19.8090010349088
g800	7.85829918311196	7.15869525351094	6.42135942699827	36.3315542215794	32.7624428106777	31.6237288842175
g801	9.95116688374207	18.6850379783947	7.71908482052069	29.8607341299769	30.0567993669662	24.4793249338432
g802	10.7111481614877	22.7514641614953	10.5287782259693	77.2250857910989	63.6999972698181	51.4025476641249
g803	4.97983103551112	5.17861522706795	6.03499682245746	27.2938730906555	39.607852838314	27.6328846824602
g804	496.265444704677	487.661174432314	628.867730329366	14.7182452045134	17.9779064758437	23.5602331206533
g805	0.892786729401792	1.72263368839826	1.24574648366831	4.67565717013421	5.70435739369881	4.62120867780942
g806	8.66288732200229	12.8909214422197	11.1270135852654	16.3457865677672	16.100457615619	21.2803403266754
g807	225.42944470898	356.933914921193	184.352395928597	868.732973595333	1085.96875698739	1014.95388789478
g808	13.7397395748237	26.5077243480718	18.0990549091155	47.113530950463	25.9368480616396	39.6684980221526
g809	144.085110205787	176.691232158538	155.442260660788	244.940215029569	206.468456980609	189.074488216298
g810	84.2934753946986	65.8181581102947	73.2672385615823	120.963446198601	165.124057647702	170.586834360738
g811	579.065545022395	611.483875274257	428.642606685531	1225.2380591427	1543.17676268827	1537.96631161509
g812	53.5429745881059	70.0840784823224	56.6677584042634	373.202269920834	400.139699728415	348.811275529397
g813	7.9673349828582	8.84981359127704	5.54426863421657	26.174647791064	31.8552581898841	29.0684813460213
g814	0.713500586431101	0.704739662143431	0.764463416043853	3.82567817705081	3.2491104209811	3.01652298911895
g815	32.8792986886405	30.0492441787646	27.9898653728575	29.8693799738655	33.9891676608713	27.1455300338797
g816	67.155885680089	93.476772112054	56.9120081814559	170.564610325519	102.896077521741	118.680777584009
g817	2.48447247791373	4.97439390477137	3.63935684988777	15.5565206276998	14.4249564814443	13.9394195640437
g818	7.6509210951671	11.0860603730655	9.51628791274413	17.168438334682	112.110385762377	149.502044244645
g819	201.613108775134	179.585534723066	248.224278914355	43.349975150393	47.7312582821071	47.7935512254841
g820	39.9706273822638	88.1097055135485	81.028532172773	157.624254650089	92.6500405547893	97.589986663389
g821	4.43932552285569	3.1830515962262	3.23700185074471	19.6527059255386	19.1674054484786	13.9286513616955
g822	3.59674768277399	1.82365977186567	5.46254983917935	21.6513419299234	28.6081741878961	18.7607174714937
g823	27.1081458843079	20.9404098239313	31.879746815234	13.8522446514882	17.8429366137037	14.1991292159928
g824	9.67390283026988	7.88491527501065	9.14300000286419	21.1461681843257	28.0850449579684	21.6999511755705
g825	13.6700755995505	26.9883155188949	13.5965539265817	106.625928276844	103.304167164376	84.5850970832747
g826	0	0	0	0.118713736663254	0	0.101405447817549
g827	0	0	0	0	1.00884478434712	0
g828	1.60516940620988	1.99767943268109	1.14368096084668	17.7959380382142	14.3998257413494	12.4896231989525
g829	0.123107842842731	2.97910757179733	0.577066882545079	13.861783622356	13.2676177946234	11.1576353511824
g830	7.72667278917866	12.7446048383273	9.58730498671983	44.2880097168549	62.1493984662203	46.7047935784584
g831	9.58942477662061	8.77826877188176	7.56173953326289	56.7952598029298	58.7680672283672	56.5819412408293
g832	59.7689137091738	72.3232932910642	65.9420995246053	104.239086333066	109.394636500306	91.1749391489676
g833	35.6675515581222	28.420246712059	26.8234350555305	26.5853731743511	30.7058131255945	30.0129474019193
g834	0	0	0	0	0	0
g835	2.76078130992171	5.415085327784	2.64329607456077	19.6725620756249	20.9532257686114	15.1383847099055
g836	0	0	0	0	0	0
g837	0	0.0427172706618374	0.104259108602627	0	0.0562692607208875	0
g4861	6.1948051991672	3.123107121721	2.17785693525487	15.7893741089309	16.3087073989372	15.7550837004666
g4862	55.6158957188057	59.0995746154612	53.2325503676479	179.520874051039	167.029542877111	136.681074035937
g4863	4.14558075711633	4.42326331386389	2.44703940186031	16.2910000835496	13.8671579817054	13.2531391845191
g4864	0	0.404590103949706	0	1.60500070915689	1.33236426927058	1.53936163669903
g4865	1.11582142495176	2.08943675724366	2.15754110563496	11.2250522709912	6.61612364225836	6.49263170812833
g4866	3.79056742352948	2.14699672175811	3.31272457261035	0	1.85291158725088	2.61435920154618
g4867	9.19939709360947	4.92182146252841	6.31430594452442	8.68535878004727	7.97939931175178	9.54600824690768
g4868	32.259098799418	37.9692583264125	19.23703957014	118.628290115751	118.673193889994	101.697402081899
g4869	25.0674564714728	27.7506900504509	33.7208980951806	21.9609743527739	36.227340168886	29.8854431667207
g4870	344.409997250791	431.68076601658	391.158074225938	1131.99465662657	1001.85093994083	750.871343686778
g4871	7.53657846578591	9.05744586076206	8.39979135294299	55.2618420944622	59.6790840794526	47.5836608111767
g4872	38.7005074928581	49.3952632728321	35.9959723592299	195.681177837342	205.142406227359	185.62607913242
g4873	3.07030599558285	3.46866739517643	3.1041635819482	17.8157511097855	19.7841896840164	16.3688881725985
g4874	13.1287154683777	10.3004340474152	11.391582522415	25.3032845639238	20.9883577960912	16.6196088899345
g4875	1.28723674671872	0.847620690842755	1.8963718483637	23.6259449083846	32.1001536629471	18.027131264524
g4876	27.6483234632659	34.9237992314518	26.2525633841973	148.136322258672	160.339064392236	138.230486518534
g4877	24.6323367484532	53.2517354180345	26.8174108459558	187.120233313545	145.909546770456	153.985286403174
g4878	61.4282061506867	53.7617208223638	46.945831379696	203.506055758774	205.488913028348	169.61633622281
g4879	14.9574826828891	12.7246572949026	14.7755044857905	109.192871796584	79.2363507705967	60.4075421569382
g4880	235.694361831082	82.4954405404594	302.533496033714	60.1518263896397	227.643423576536	246.496724717211
g4881	49.3570647277062	77.3389081065449	47.6680773460279	1085.63521115665	824.455668526491	545.754708596927
g4882	15.7772802131978	14.125093442825	14.677392975996	94.9569735411503	100.400105889689	88.2957706793887
g4883	490.763458661444	592.82083326345	459.645738771909	976.516220939667	1059.52567501884	878.535676944662
g4884	4.4496090016876	7.84816640096787	4.08636760643229	30.0848084852216	28.8774392805697	27.154175238246
g4885	1.33154208256063	2.5777770180837	0.699058223518339	16.684508326377	15.1992311274901	12.544326770176
g4886	9.74668604048806	23.5112941499471	14.5590837440087	72.1793776567428	67.3651534549124	39.4212075902607
g4887	3.73908087340756	5.81332233334202	3.50538144991731	10.9237885569896	9.594509981389	10.3191167308562
g4888	0	0.133245209837205	0	0.751141472138135	1.75517052844793	0.926793322291995
g4889	116.952450700595	138.163713406315	135.981688965444	170.225749428382	137.080920272416	133.154287767269
g4890	0	0	0.0538681774091829	0.497681959180773	0.436094633815039	0.354267215684561
g4891	4.49456489701566	9.18903319462641	9.65060934603245	17.4763699072315	23.3281720137888	22.4372068073032
g4892	0	0	0	0	0	0
g4893	0	0.294542042798031	0.159751627658563	1.10694532736146	1.29328354727742	0.840492729527964
g4894	0.148226458217276	0.427018715015411	0	4.43999645955752	3.3186895958047	2.83306496245855
g4895	0	0	0	0	0	0
g4896	0	0	0	0	0	0
g4897	0.245480713489387	0	0.0575344294835989	0	0.0931550208829977	0.264864975642851
g4898	1.39304413922549	2.54166554416739	1.90454880207566	12.2333466634917	14.2290217880361	11.058118074401
g4899	2.40011218662922	6.20607017207591	1.09761012967003	23.1123341240033	20.4373415690062	15.0866590218306
g4900	10.3243935449548	16.1647095449338	16.9384249683292	47.3040544564275	47.6961842730632	34.0416759867863
g4901	43.3183148678387	74.2819763034751	33.1977506577187	479.669007044459	456.884096359977	387.477338232607
g4902	2.80190933625024	4.8431342369448	1.06713134753438	14.2198630479302	9.90168838878797	10.6890325105806
g4903	23.0953770564739	7.84155410430105	15.7556044230287	47.7027991481605	90.8506721342244	61.2170550703984
g4904	22.7092583736947	12.2626832229367	31.0606095563271	34.8412781028759	33.6382084479853	23.2680589976233
g4905	2.81750883148418	4.00768493879089	1.44452074024668	20.1457465322545	20.2477524512391	19.4342346459756
g4906	0	0.159642845748349	0.25975786896234	2.69985755551537	5.04694317991443	2.81871612026542
g4907	2.22339687325914	3.24534223411712	2.01494946803592	15.9946860410566	15.9747092408226	12.0633733885332
g4908	0	0	0	0.0316536200573949	0	0
g4909	5.19917154202143	8.55888667234646	6.75426765198536	45.3539655062828	42.8982573135965	38.4208682798607
g4910	0.962700768952265	4.19091541367258	2.70759060707155	18.066476573362	10.9597706020644	23.5443189846936
g4911	95.4873438845565	46.0346412640405	73.0769056948081	79.4706886430549	58.4205598973586	65.1806344087917
g4912	32.6479172763348	36.110641555256	27.2884918411687	150.190290246001	129.464982546369	114.064960834312
g4913	13.8702020413415	9.2612982040442	12.7602368038184	32.6537626855892	31.2856380033598	34.2067557266006
g4914	1.67527784833248	3.24322662640257	2.95267142183594	6.1427006829503	7.12022568352769	7.47815598719701
g4915	4.19483371100001	6.67773195922038	4.90567542935987	10.8313174753232	13.4241009531804	11.5451616809525
g4916	0	0	0	0	0	0
g4917	21.5234484274412	49.8757859138	16.2087126997702	1058.10069634639	1656.84171846145	842.990797253293
g4918	16.1566839456831	37.5776469213562	14.729975421504	124.373394800858	84.7109581573201	64.6578535786912
g4919	33.2915782960216	21.8064870799256	27.0493543614795	102.778441045814	146.371149787139	118.186320929402
g4920	0.760037329195422	4.16015681951982	0.356266799944651	19.474758094018	27.399801659902	13.0037022963816
g4921	1.11229989655921	2.18965493839327	1.56416866450001	8.39640100948959	9.60267406994427	8.88669247950227
g4922	45.0228007318209	54.0635757564395	36.6072522264864	203.970900386413	213.869037633955	184.609385660478
g4923	7.43371470723601	6.46404789710241	6.19950069247076	30.5474566391691	26.374980236028	27.105937138453
g4924	2.17878441656805	2.2094190877457	1.22556383278968	5.66142237160493	6.15143000341202	7.76445909794182
g4925	14.8467757102746	24.7929052071506	10.2621844999969	92.4499571015852	99.7896081261182	100.459038344343
g4926	1.59318471819047	3.11303549209281	1.55854721377404	7.44960695873686	7.80699023143014	7.36709895069372
g4927	1.03173351060904	0.237781849873419	0.419140917365462	0.248230463079737	1.61829189004672	0.95417471390718
g4928	21.17178666973	22.2549398047218	14.0069167826866	86.9182541125379	75.9009858069418	83.584781795359
g4929	3.81466001308581	2.31357405361865	5.17613214470367	47.8216956773361	45.3323352966394	32.7413829928487
g4930	0.0543601527095086	0	0	0.0392364280351843	0	0
g4931	8.03784047752499	5.71177413619701	5.3166861476536	11.989984263339	13.8275719529628	9.52603305410292
g4932	0.406037059013881	0.623857756657143	1.07853382458557	4.93338026785246	4.26296141483172	2.7954925130743
g4933	0	0.0898748039038505	0	0.225177800954578	0.414356077334275	0.432781216975502
g4934	22.4790995040395	51.3349934885844	21.7326805674665	108.294172504242	116.71499196039	96.6917691853692
g4935	0	0	0.0906586729868563	0.977182686550771	0.0733935371491162	0.0596222059134224
g4936	0	0.0366223501453934	0	0	0.0482407358104873	0
g4937	0.993625251766686	0.520452511183106	1.5243084788493	0.717185359894437	7.19843554384764	6.29328624966115
g4938	2.64935692715672	3.05296369962049	0.49675345043829	0.573681072792785	3.61936066961647	2.2868496608339
g4939	7.93147435152159	4.52463680463235	6.3314244210179	7.70868419891258	10.6685271719804	10.9907547052061
g4940	0.512055037477862	0.0737577780481164	0.720075985442303	1.24738126163911	2.33177574065785	3.59117985343903
g4941	2.60540446200573	1.0371635204425	4.79630336109818	1.53862849937973	5.24909224814219	7.21403963448576
g4942	4.2272788362296	0.712868554936459	6.47623003891363	1.56280621234223	10.5640316435145	7.4375861300484
g4943	0	0.498757859138	2.4346148055165	0	1.47822309453809	0.667141104062821
g4944	0	0	0	0	0	0
g4945	0.883986905916174	1.01865471844831	1.42069045776454	1.0026498028991	1.15013262883799	1.5572089652572
g4946	0.0256027518738931	0.0885093336577397	0.0720075985442303	2.73499891440871	2.95358260483328	2.62037738756431
g4947	22.392746473855	12.5972718281424	22.4808628411044	45.5612325530069	31.5816292924948	33.1567984394858
g4948	34.0115965191236	47.8154247693461	27.7218976938637	131.669892333538	145.101908404002	127.324230290573
g4949	29.658720235977	43.3034188008232	23.4012579218692	99.3880612805733	68.2340728813679	64.5233920093064
g4950	28.5989846014887	36.387200178965	28.2654811835388	313.083300674966	304.535962807577	257.415005964131
g4951	1.04072299724849	1.36280478077859	1.06437370696764	7.34107609945914	9.33479327992303	7.58324218607992
g4952	0.903692736471919	2.99391736872673	1.58851927557739	20.954279067621	10.1165328997387	14.4864925453641
g4953	0.627093211664876	0.55586575103367	0.226114897665482	1.88014482045275	2.23325064728303	1.84395171418584
g4954	0	0	0.4993273025131	0	0.202117435205986	0.246289138157907
g4955	3.17419390512553	4.22048663462975	2.97580095488211	11.9841658151741	8.15383021268044	11.7423172947874
g4956	2.30667830965106	2.589925016525	4.54680891229707	13.1059828666639	9.20227425077656	8.0955154687485
g4957	35.8957807283855	47.0673403040993	47.2517820006281	36.092063685321	39.3324779305169	30.4090077676449
g4958	2.88052059750424	4.03527993176211	2.32982827084684	3.87287259031906	2.65773321942289	3.18633189399235
g4959	0	0.10304914445	0.125754896979158	0.645463987947225	0.339353327488084	0.578924098566911
g4960	1.56370592122224	0.643543959862052	0.663177551001643	2.25732385904412	2.37358048501227	2.61685554400592
g4961	26.8619000211326	27.7170518218662	18.1054118400565	37.7633363851938	36.3103713443922	33.4482102643281
g4962	1.0703688071305	1.46184332026564	0.929137768849096	14.3928387826881	13.5093641208215	9.99682514398801
g4963	2.78488578351008	7.55091579571474	5.45201755086614	53.090107332471	48.6753540890731	42.824611428925
g4964	3.76653613827227	9.04236576681488	4.85529097665028	56.6382331408653	47.6441709859607	35.8983026148002
g4965	0	0.0464347281635731	0.1133322258546	0.145425490816412	0.825742026545192	0.223600801244105
g4966	0	0	0	0	0	0
g4967	0.234223978977342	0.472335483233794	0.301928756261837	3.93063853235638	4.55526990824542	3.39365995971575
g4968	0.548373199083651	0.057446649633984	0.747780169815932	6.00909130175902	6.88610769063575	10.2352128162111
g4969	2.63456417909662	2.27693805258652	2.38168839670093	21.1891795417249	19.3525825420205	19.9562208519661
g4970	1.55002815148799	0.243567494609887	0.132104413139175	2.03416272555267	4.11743276846629	1.65070554192377
g4971	0.340193211606224	0	0.74417119216238	1.10496100727656	1.37702954201011	1.36335233897008
g4972	31.7074655839681	33.4486217133241	38.3487409648156	15.7466512210701	17.0136713331442	15.844601221492
g4973	0	0	0	0	0	0
g4974	6.8191493187904	8.359561859229	4.6246799704883	47.177609709594	40.1373560778781	41.9540887671404
g4975	9.66850883305685	7.96921236392118	10.7637485074068	16.4772495368657	22.4217016299051	21.2365262615948
g4976	8.94309345438265	13.0710963882596	10.6814810500486	58.4597320813454	68.2196264690781	64.3285358021744
g4977	0	0	0	0	0	0
g4978	2.18436775218636	2.49221526499632	2.08839205694465	4.04308565587296	3.38135282512922	2.37352326313955
g4979	17.5083179846785	17.577192293815	10.3209342696224	214.929305491133	202.442387882459	170.099460855243
g4980	0.040566317590245	0.210358114425311	0.11409254465473	0.702725355149489	0.815887626172861	0.612774632875381
g4981	4.84241138851224	7.44014822929	4.30081747668721	65.4887762171255	98.7789665652316	83.4918821390355
g4982	0.356514620024326	0	0	1.28663731932717	2.9763836874611	2.49117429609585
g4983	0.300444818962741	0.642970726550553	0.321904532392579	5.94807866371208	10.6194779025388	7.83298866231588
g4984	0	0	0	0	0	0
g4985	9.97617522524902	11.2629336223376	8.72071040992386	69.6713405335161	71.1108778265047	54.9002444946647
g4986	0	0	0	0.16094595534606	0	0
g4987	0.759195338062635	0.524911336241987	0.28469769389964	2.41109878747376	4.43673146912283	1.87233101583362
g4988	0	0	0	0	0	0
g4989	0.267521272019989	0.924827520197332	1.44210403113575	7.3375439056663	8.42607467681116	9.64902195401204
g4990	0.197936550912094	0	0.680405560484795	0.285735887347369	1.4521839343362	1.8305701026114
g4991	0	0	0	0	0	0
g4992	0	0	0	0	0.363293736854531	0
g4993	0	0	0	0	0	0
g4994	0	0	0.898257237943006	0	0	0
g4995	143.724164671318	103.035888511051	134.150817719741	141.858824869901	186.919008833981	162.7650612462
g4996	4.832540909441	8.03489197184202	4.85410524101888	20.9782081662314	24.1020629920583	20.0904010115359
g4997	57.9909052346646	93.5732228786006	57.9811521731378	112.713483094096	101.662492266902	81.1129472884181
g4998	0	0	0.76416874402225	4.44522802483549	3.16193584098457	2.68032020663125
g4999	23.4960111482699	17.537492254755	14.2677913115496	43.1686315139104	52.0791007981928	39.0147583324011
g5000	0.791407561131845	2.02660379033832	1.48388626940163	7.33075095413056	5.63940494791586	6.9938530626945
g5001	30.1851913132691	61.943479086427	36.7493646729713	102.310611746187	109.211708915325	95.3480427488014
g5002	18.6097942376074	8.96616010916244	19.2890740907216	18.5852075053182	18.598747024421	18.3236043778784
g5003	23.7442084491319	29.0298148294054	17.916707547639	123.520806985885	124.607960856486	96.5851184318554
g5004	22.1517380260292	19.0920333657122	29.0054472414422	72.2800689612642	115.810230714616	92.5561745440672
g5005	28.4882352259623	37.7523991529976	46.7384193322308	41.1248510380786	69.7291147943201	72.5997432412012
g5006	26.1385943092	27.6588060943124	28.6283021522761	96.2825729431875	107.67917549897	116.606967424672
g5007	4.3781387232801	3.15319409614751	3.97623147861918	19.0921603994807	23.225212255085	15.2962964764714
g5008	7.84367585277564	11.3688546281903	7.87046986929888	51.0637142241901	48.2986570456672	43.9020604932905
g5009	0	0	0	0.174853304197644	0	0.248933247784635
g5010	0	0.281365775641983	0.114453882880081	1.85049619204894	2.64072910297037	1.16670460300772
g5011	0.462891824648289	0.381006727389112	0.247977277285373	8.09021323754483	10.0627048329989	5.54484597265465
g5012	3.35094118725326	1.24928562511795	1.84794188657772	7.32713019913418	10.0981203725637	8.84137862982583
g5013	4.94633794222523	4.82296695989398	4.22102530927638	18.2171758143025	30.3213558873483	27.8771145488558
g5014	4.11977571038669	9.8776301934974	4.36064114864381	37.6256166824186	35.6045474935969	25.8716630158299
g5015	6.04240640104939	8.50073686170563	5.59523882834098	32.6965800131843	35.9279229702867	27.8608999480689
g5016	24.6128990021489	24.3583503740988	36.9192761587714	84.8552413473257	118.234714181286	104.083408587378
g5017	17.8966919447703	23.6057788906771	16.7781158209905	134.460387884324	125.501258889601	107.469712457717
g5018	2.18325767306933	2.09654852292522	0.950300026805588	14.3139350622728	12.9798743699363	9.88735165983369
g5019	11.5273060474532	7.80570464517997	7.01886782804252	58.499110118742	86.5857072715956	65.6497696853495
g5020	15.2918254374071	17.06199405965	12.856941134012	61.2314801709078	84.4650432117842	73.4800396670845
g5021	1221.04485687819	1579.58101111062	1135.44394525433	4193.4402219838	4576.3605836737	4126.86448328585
g5022	13.0249627017583	9.85898687395456	10.5348756594813	78.7123688745486	88.7749990936543	79.7544399372492
g5023	2.68525841694513	5.00411903058611	1.82906648016482	14.9906376653853	15.7786069427765	14.8745235956864
g5024	1.6744894822862	3.96636623273771	1.74425645945752	45.0548174779656	45.8925470526533	26.269058314727
g5025	20.9364041645696	18.5344785722065	21.8180715653167	41.3137293785471	45.760164705386	48.2540128109075
g5026	11.32299673317	10.7453772028111	10.4071457219253	65.5425462949119	74.8157548927488	46.5413772380758
g5027	18.2099289235927	13.0101142175501	15.0231619236182	93.0572692178738	135.856572860388	125.970895096645
g5028	1.16021499744561	0.66848189359636	0.217539885744985	5.94573596437007	7.83695526982668	6.36645376394035
g5029	91.9316354290382	76.0490434491462	95.3517263796382	36.1669161399774	45.8622349343886	54.6711999874995
g5030	521.237060500767	690.274613212026	434.649131307984	1492.19160164143	1632.24012051838	1623.36272232253
g5031	2.46426486786221	3.24534223411712	2.35739161900754	10.5268418640972	12.1758944553101	9.98426926285797
g5032	28.3656148738695	35.7599974476302	20.6832203161263	51.9722579436709	45.4487747816253	45.590597854293
g5033	5.3285807869598	7.3326441671207	6.40204446845683	11.5009533506172	11.9362195857127	8.38878736034705
g5034	24.7623700487207	30.5728976154303	27.0187620644259	52.1174931960387	66.3305234728632	52.0883246633664
g5035	17.3876731436332	21.4227112369114	8.30423800019924	95.1130669409712	107.896307432302	89.471429025191
g5036	0.78072188942036	0.299886054545	0.24397511236716	0.281757286384305	1.38258559475082	0.481354973817478
g5037	3.03482732942737	9.95344743491713	10.8699131251849	70.8822557101751	78.6079229493101	85.6400096301687
g5038	6.71236325947542	3.20447271904195	5.93323804049614	11.9045957941229	12.0810417707638	13.6571003065845
g5039	97.7045591379234	151.664018727696	125.773847264486	342.830953772425	241.155804360548	239.440778842355
g5040	0.551672891450881	0.847620690842755	1.03438464456202	1.19457024817675	0.418697656473223	0.90702547242888
g5041	113.142033989412	80.6116025614453	102.485563065916	115.271817602448	133.841546415265	156.851150822822
g5042	22.788596792248	34.4222114436539	22.8655404891978	127.498126404363	147.153118518262	149.579111351604
g5043	1.49597784078122	2.8320839974442	2.1538031619315	3.7406550338928	3.9738556855364	3.75526931237024
g5044	649.181827593501	459.318714547088	799.289383518672	75.3050660506226	75.6851393421373	95.6765813260769
g5045	2209.88877762064	2472.57097391865	2484.60342084806	92.9668082186087	97.7547819988091	193.954331685395
g5046	34.7337579303682	56.0676156972163	32.1673342406934	35.7278003637699	24.9740837449322	28.394565800485
g5047	14.2997383284925	18.7909077497081	10.4072727157718	83.1141017822352	86.3474292867432	82.094175456321
g5048	2.24916233135282	1.53588319669724	0.546670328764342	5.89239576225631	8.09255935061374	7.39585924115024
g5049	43.3597479762728	49.7952833899076	26.1319397615069	216.414120011114	227.336007473021	190.953587174366
g5050	0	0.269113952772302	0.109470090176102	5.0007206375566	4.7265326763808	2.95173941725637
g5051	12.7473118735235	15.1597297211517	11.227592549712	76.1279340638969	78.8092093318578	75.0695669523116
g5052	3.61260554795683	5.29830633109856	2.46313531974513	67.3216877243691	107.180357493577	74.5151852972403
g5053	1.37671940321894	4.75935233887266	2.32320944053193	42.4640095988536	37.1975484057131	32.9341353961012
g5054	4.45965504441131	2.82647485249029	2.19498216603643	17.3016901997014	12.100301722885	13.885507361134
g5055	3.86689838647075	1.48532904758965	2.41680675573738	12.7924285197472	11.7392847633119	11.7220247281257
g5056	7.14041623198569	3.41547813105642	3.78912854724882	6.12628228193396	10.1228252542091	5.48227355501165
g5057	0	1.56479513269848	3.05532901616998	5.19470611224607	4.94693770078799	3.01403246485449
g5058	0.570839655727403	0.506001672555639	0.267580564289912	3.55767218615181	3.46595571076852	3.58043316794928
g5059	0	0	0	0	0	0
g5060	4.23069533787838	6.85028866260138	5.22733928492027	21.5791907347461	18.4587224394769	16.1990815358605
g5061	0.639561955039869	0.33499714803528	3.10695681840871	1.38488168477353	6.66324481245254	30.0760643095742
g5062	8.77849125004548	11.9891188069018	4.72452596352537	55.2266065394419	49.105267268042	38.2208198152596
g5063	3046.07288357944	2029.96598487524	3047.37866838483	84.160713945705	70.3713484660377	225.505195606062
g5064	0	0	0	0	0.515533017551832	0.139600010762044
g5065	35.8999967290824	43.4134537541566	15.1648489895222	83.2352024193498	79.9182598572753	86.8638036508191
g5066	128.092267807829	140.665302460014	156.977971224831	6.666054548962	7.92363507705967	3.46600651720137
g5067	118.071894813094	128.301376232917	166.523768761031	11.7741898768655	19.0621687883691	13.7293270030057
g5068	9.98625762951718	9.86363846329198	9.36209818235432	24.1981064998826	20.5118808993239	17.4449425939018
g5069	2.6845279331538	4.89803011830299	4.71888751069235	14.6938928677313	20.3744931419832	18.551459101551
g5070	15.1439134354083	20.6238601351148	13.9822790402385	167.603657231044	180.240929774874	137.932912419238
g5071	2.18132729493222	5.02726754568806	5.24028772518058	26.1752768173288	40.1468488540187	26.7298842887769
g5072	6.94200329380701	7.5380449165175	3.87983798822841	32.2801150829464	34.7025136641654	30.9072610840013
g5073	0.317595413306944	0.548967520034745	0	6.91528911433088	6.4679660804898	5.6459650078643
g5074	5.07546323767351	2.41744880704643	1.96673815071486	13.6766977722642	11.5562207028571	10.5561135195194
g5075	17.3652077300191	19.3570338475937	17.0161249847928	152.801106295126	135.868041148965	118.121636610478
g5076	6.71206745206039	8.22181175249981	4.90521684787547	30.7846997066985	28.519445564289	23.4288293640159
g5077	7.2286073594729	10.9022691287792	8.67032547724659	47.8783426046214	37.2740501087424	30.8043953427145
g5078	13.200006263073	43.5412408729823	12.452325257616	49.1266215625924	18.9721115464059	35.1480560001636
g5079	0	0	0	0	0.373288660236893	0
g5080	380.752860657714	454.109055587966	447.928547301611	438.409829497396	345.523151057544	374.895940581478
g5081	1796.20822067695	1637.04142055229	1800.60053324658	5547.03088435691	4580.11433370553	3899.43975324719
g5082	5.53157213131914	2.52314443874465	2.26880443619461	13.3918943405156	12.1574090454506	18.7577341814972
g5083	81.5177611567158	74.5712043017387	127.180671792239	66.3949808505137	69.274451875986	76.7893923404148
g5084	3.21234527417752	4.74937466101338	2.32970338725599	16.1428983006857	17.4342972087409	11.7339735461049
g5085	85.8879683832727	88.4515890815047	103.661333516132	1413.63068000322	809.429798641172	664.430843327566
g5086	0	0.364103457618673	1.08613920413454	0.532144055227187	0.799357889236789	0.519495122016131
g838	6.74274453589738	8.64956002620201	12.1655411847437	32.5985276264349	35.339533138813	24.8650425109553
g839	3.19603895298881	3.75808983328918	2.38479480077164	20.6204856672371	15.1480348837501	13.0697852715353
g840	3.79428828678142	4.93943594088405	3.58690514622267	15.7903020387996	13.0731742144585	12.8812325606076
g841	22.5519749860626	31.2757439411632	20.1590660448273	171.48380965706	218.826669192518	206.869053703051
g842	25.5397503378683	45.3861343141106	17.2007679768613	287.779105208488	253.212838266765	240.693142591689
g843	12.7837113466417	12.5114301121074	14.0368815714138	94.3566912469323	107.390123733432	94.2578321387565
g844	5.61628577736998	1.76505782103887	1.75508586628363	18.1804977505811	22.3460233248101	20.9862267834331
g845	18.005314782339	51.0570169625598	21.9549670379171	381.003481541946	310.283004445976	238.639466136175
g846	0.602550110045022	1.24981819918813	1.1297792424974	5.13196839326785	1.92070800677576	1.11450887841679
g847	24.0719485943127	36.0833862869948	23.0719634462966	184.377801974907	117.007428270799	79.2154646504293
g848	0	0	0.467816356238001	1.98096344553366	1.70426206287766	0.922986478921864
g849	0	0	0	0	0	0
g850	0	0	0	0	0.0664825990536946	0.189028050362921
g851	0	0	0	0	1.39316660695555	0
g852	6.27642845877762	5.86580006209775	3.98453584957328	33.9589775551134	35.3328484856341	33.5174256608485
g853	22.6549807642145	37.1170813087893	25.2845271999699	139.38185161081	159.192782782195	146.14090961712
g854	6.57537625418001	27.7826206182948	11.3014057914212	119.125058245509	96.1492894113798	87.8378745754354
g855	0	0	1.14453882880081	0	0	0.903255176522109
g856	1.26329827805616	1.18616741647522	0.833424314208255	6.14642127694361	7.81238625293233	4.87526191430523
g857	16.6435780775092	24.4912766444803	19.027074794132	95.2406361407291	79.7439802746599	76.9252159477911
g858	3.1583767066834	3.47816987434287	2.59632059187756	17.7320446298696	17.34636866272	13.6119201654591
g859	0.732822771555728	1.15153912714136	0.0624563638269788	7.64561087550929	8.94949281149927	7.68098620458588
g860	3.68408828646933	3.31342633693077	2.3587104394937	16.5384630950228	11.0479086173957	9.52892101432386
g861	20.4620332936289	30.2842478384618	18.4557965897743	139.502639840722	103.556965372869	96.4427991330815
g862	19.6131283857767	21.158401737451	12.64939977043	52.0075402499707	53.4191731727907	41.1659463400063
g863	0	0	0	0	0.316500324501057	0
g864	0.250515959643414	0	0.156572167969177	2.65201280116935	2.21820190871882	1.90495611761236
g865	4.83587642037659	3.16281604888846	2.51187345504524	34.4801897253808	31.8417837592281	25.625343615687
g866	1.73974695911103	1.58999988651376	1.29355932060441	12.9469679246837	11.9063506228521	10.1901082848463
g867	16.3768889585432	12.5811782199302	11.6234047683112	71.5915423621782	82.5818002409221	77.1836019898422
g868	1.03983430840429	1.79736620119276	0.348158126390998	8.9528513469849	13.8108712770449	10.6699193196752
g869	13.1392167605457	14.3774586945393	19.6673815071486	126.23694876114	112.375123003151	107.967937861595
g870	0	0	0	0	0	0
g871	22.2893686356626	35.5533954652295	21.6386086465099	148.392170829067	198.549096578155	174.747191103565
g872	3.52990281949164	4.31417763172177	2.90815287426204	19.6878270350739	22.325458633835	17.2130735434315
g873	3.19984587622353	15.2101740116501	7.1246428728231	84.4449610262687	78.7762534329883	59.8025804857869
g874	38.4520132569878	40.1742614717142	52.7512523192361	144.691617940562	180.354276559293	184.287331912815
g875	19.0122504001479	15.5959549996914	9.36512617848236	43.0290777482404	61.6312450073877	42.9145312080536
g876	8.39582597313833	16.9930197295316	8.67836080325909	80.722233241571	65.3548314048256	60.4583527236826
g877	4.64715410369262	4.926699467525	6.44791368398923	10.1969303643844	12.2739741574818	8.93944951375317
g878	312.486012628503	353.159695537908	306.795459451805	506.546146965712	387.804228059562	394.597994250136
g879	218.033988604289	216.442333232236	245.387467001091	100.56582710092	97.2290470484899	104.953064687006
g880	6.40562618471008	5.09672812286791	4.36096463834326	33.9056295366118	36.7514870499549	26.4233409094318
g881	15.3587896403029	17.8379281385826	12.9249403645803	113.563655440362	119.595977619214	87.3130730840806
g882	62.7784047867836	63.8810847262019	77.0100907139288	70.1550486196348	73.0019302044706	64.4535742545692
g883	53.6717511296209	76.5240210867706	49.2937680571206	343.271800484231	367.578995455004	334.391194628444
g884	9.74266419711868	10.0812758761936	9.87934038183075	39.0354646668339	49.496487885028	44.1319647175019
g885	242.970115283245	238.877329978103	188.359876525282	767.319830891037	666.898138083413	516.833163619926
g886	18.7568783093299	25.534573311638	11.8954234124632	119.987944927975	111.966731635214	107.425829390795
g887	1.03771723821412	0.633072995194462	0.572269414400405	14.5836723706714	13.3426312571134	11.2906897065264
g888	16.8262375810175	13.865476237151	10.5463390715156	14.9591672287657	14.0681024075598	15.7140612145374
g5087	0.407593373408726	4.03930581795942	0.611388862077895	11.7678168778007	12.6832296969466	15.731515249253
g5088	71.0672229904933	79.611420460538	58.9798543270668	85.9127320723632	103.630121738995	107.91328704989
g5089	392.577522716818	300.213457756631	452.292961497787	19.730989579226	15.8420916461283	29.7237718751524
g5090	18.0033317465507	22.3821033748531	19.3272770645112	27.8747724209297	32.4138299182939	28.4327429654177
g5091	76.3029019756315	71.2319949158164	86.1510507522534	34.060484848014	50.1614779395645	56.9980285551658
g5092	6.8977106353262	7.79396309701436	4.43679996982329	14.189223417579	10.2229604813841	10.2893924800891
g5093	9.97838210382082	9.93361790098228	9.6314816042475	17.6860284015114	18.4624583318084	15.9811141556232
g5094	229.864082370715	255.395772325542	209.758479564948	602.557531446571	549.3253070514	486.465046126793
g5095	33.0682601753569	13.5003850658218	20.3723703663203	2.86418712078162	3.72876944802808	3.6116370431342
g5096	1880.75305397818	1739.02422370323	2019.97883343466	109.437704327589	131.39423992491	140.482731748881
g5097	230.235370110492	297.241096796839	162.931429233569	691.544383683534	794.32302682488	838.563217938441
g5098	912.002529179093	769.724265927072	925.001862049995	38.5585955697576	33.6334552513835	47.2842823853974
g5099	3.22036055210034	2.95562773470328	1.20228933249966	12.8562665328759	12.523436114202	11.0345545518126
g5100	10.6931061531012	12.728971122873	7.32942897678085	37.644137545941	42.3008585075609	31.5959074406985
g5101	4.59692416019315	3.38120813164439	8.43582833817564	3.52978522428799	3.93427068453288	2.77393589415274
g5102	10.755711972326	7.94745949664784	12.1617306412416	23.2307232288316	30.6585673760697	30.4742809435725
g5103	576.994281171784	834.525778255373	534.899836532781	1277.56072510207	1246.59722965743	1224.23535252142
g5104	59.8593119383324	79.0903754524854	64.932339738083	282.533264276684	255.459184172971	231.485759309115
g5105	10.201284168092	13.2576449002797	9.0136968828736	65.0450780504709	77.943122002837	70.0498159265962
g5106	2.06831084051672	0.23834002322993	0.969518806690425	0.597151592873509	0.549417816827539	0.255043882840918
g5107	29.9272235822651	13.4022894883926	42.9826247032913	38.7488352251134	36.5731464145377	42.2595573109956
g5108	18.4702298360988	14.1521956032455	17.4064652134764	27.5705115133967	23.6327189620154	28.3801700147891
g5109	19.5510447794406	20.4267271980018	16.6998180253007	51.4919578405174	49.3296389113727	39.3771154616961
g5110	1.63847895578542	2.24772279972059	1.28005917589222	11.5165840358802	12.7314807952522	10.5109536755856
g5111	43.2217321355383	37.1342624658211	29.5834008344738	396.517684378135	306.48110190298	266.189300521066
g5112	1.1891458084359	1.82706927833329	0.743214673920526	13.9236869801053	22.2620144700146	12.3824132939166
g5113	55.3781412292698	66.6417512103228	65.2481906698438	64.0045140132191	60.308574132174	55.4445276060392
g5114	13.3832888985125	14.3556949587418	18.5532597569514	23.8927837380596	21.1251911536694	18.609725534384
g5115	0.798629679706732	0.131470578851582	1.17655034765295	9.79948297927801	8.13943287348945	7.5969675113036
g5116	18.0144663787392	32.9546197727271	24.5939205549962	284.350605548141	327.963321467406	298.218649934412
g5117	18.9590868166244	13.735248046884	20.6239662108037	98.9666073155724	104.61000744897	75.8074772838388
g5118	1.80274898968769	2.43097930410079	1.47431975551722	7.9456255649146	9.78127719271476	6.88175963500623
g5119	14.7612267270164	35.2495822591476	19.1739956388897	130.99845184348	127.351818071113	116.449595136502
g5120	49.6302742646568	44.293342110769	57.9877810053178	35.8756143659098	44.8767306458288	50.9388039269743
g5121	13.540827613125	21.1479343089518	17.124071577945	83.3250320224316	77.2520254632682	67.339555191341
g5122	0.628331593971154	0.289621006223166	1.59046123068201	2.04084587020416	2.81358341649213	4.80374217962105
g5123	62.9846237133447	55.7961798966409	41.3275096670052	64.1506456386363	77.4769076785001	69.5246733698717
g5124	4.37425739462471	2.97855878160266	2.42323443327924	53.2432257036595	43.3094268993995	26.1114124578553
g5125	11.1446843178313	10.8147210540622	8.93589302428935	48.6878734531889	58.3182324030008	43.397481234329
g5126	2.35477644767903	1.87858136371361	0.849076382246945	22.4222531252731	20.7587961734204	16.6961612871405
g5127	19.3612846389342	22.8468054960061	17.9331367237977	40.7910605333295	35.919743558519	29.6817416547407
g5128	1.07921311048484	0.621810979240289	0	3.60269706081068	2.04769894985592	3.82599294587208
g5129	0.186560887066571	1.71985468668276	0.437251222255119	4.37635712517666	8.42473890086366	6.21131372748144
g5130	7.04880334448097	8.3933822580652	7.26906420504213	17.4678783947359	19.6157858259341	18.2891968385222
g5131	1.37133202739702	2.74962226906054	0.565673352847017	23.8543977920258	27.7265431019285	20.308821843129
g5132	13.4651661332936	23.8423784899435	8.31308170413981	63.2918683887554	82.005436314853	64.1883525522423
g5133	41.4176191002266	39.46944578468	31.996869945482	42.6357182433259	29.8364818510495	31.6018355989112
g5134	2.76943871498031	14.6426138518723	6.26177011852006	31.6303438613463	31.652038791307	22.2979491040965
g5135	13.0470638828133	13.9412413126362	10.8972422304609	68.9452855236588	88.9397561880421	65.5722727474053
g5136	13980.6069839158	8508.8323833363	11461.7455662978	3063.88227480483	9122.55910433422	9209.71148008854
g5137	1531.40662485179	1243.87842457804	1572.27465662964	257.09217771551	248.245023281007	278.771301081714
g5138	1.12380439173799	3.50413479812389	3.96636066922303	11.3083422786138	9.7835236964338	7.33640699644646
g5139	1.96736935452021	3.40062176685	3.22770902246506	28.2229128729924	27.8100051876485	27.5953820316894
g5140	120.036403841185	21.9751318495682	137.024421272994	67.5024106185591	207.781859794173	206.805265244175
g5141	6.56138609193707	3.26158925406264	5.06576610033941	3.06441904715846	7.90914108779769	6.34577270447739
g5142	6.03285096370278	1.2949625082625	7.26380448184045	0.725738464929269	10.3245028179444	17.576749801517
g5143	0	0.75811194588976	0.462576813048135	0	0	0
g5144	2.16714790106144	3.16323940879863	4.19884083054937	5.83974811414459	7.12737378681404	6.76986475240136
g5145	26.7621592496996	20.2190416603142	21.101743986032	81.9994668115793	81.2456332994214	64.1433166690745
g5146	4.31135614988475	6.8134686568882	6.75572787180845	15.870582680041	14.8648957080074	13.5566749816001
g5147	0.388198824674021	3.22083058582319	0.946232780970821	20.1181228578682	20.8006929654813	15.9403389932231
g5148	47.5888461091295	84.9726791909956	49.2525922983834	100.949754104877	91.3678891321006	89.1364731818694
g5149	1.37698667547738	0.551916093396738	0.505143578605273	0.216063149139585	0.545257984783999	0.147649166886355
g5150	8.73837354335772	8.97108900420166	7.59641211535771	29.0133069704436	25.5636382654965	22.2852969266734
g5151	35.5894042218089	21.6258290485617	27.8173761958429	35.9387288726647	37.3405312943217	37.4745667047788
g5152	11.5959909034676	11.0830483131279	7.6098541186585	75.7223486181503	77.7067102284375	62.0326126123443
g5153	3.25935520501915	3.61143266906326	1.99791814578717	16.55839467178	20.3606202655552	18.8589399904588
g5154	34.4257339701726	42.2259819767397	32.5452729630489	266.646532104201	238.662770258719	185.319407157188
g5155	26.8494530379017	29.7242469455961	19.5077674967828	26.5777022380419	29.0381666658719	20.6334545757489
g5156	18.1277575638234	16.5886139612159	18.7941824111881	30.4019229654987	53.7380779180861	32.1494190759734
g5157	11.689689661989	10.6908837134725	7.91487853252488	106.204865945352	96.5358839491146	73.045327652871
g5158	6.30834806357598	15.1345914751005	5.91406472081159	193.551760040126	178.953231766684	164.248260549551
g5159	20.7566925408394	21.2388191854367	14.880687919747	54.9756062743433	56.5272622831239	48.8601616852796
g5160	11.1643858281954	15.4382209415403	7.52043960607219	49.3048805731333	42.6804379669084	41.4024656214047
g5161	0	0	0	0	0	0
g5162	618.591977050732	895.159872816825	511.981773302485	1768.02697206151	2065.58287855773	1884.02336752161
g5163	56.6756350666455	50.5470950960894	55.8235976198419	166.145969931249	201.693855097508	182.805309406885
g5164	5.46889914658006	9.56976286375621	4.36751506572542	53.6551001913967	58.8781032236109	36.5284402544742
g5165	7.69760115621946	13.2684374305004	7.15634955183673	53.8471434240889	62.657287798128	52.5615601207185
g5166	272.911394827057	357.54512785445	299.604805741491	1634.24843962901	1388.75633720592	1117.6762260412
g5167	3.11893953295618	3.29457625031106	1.82750005154921	15.1956584540511	14.1535864140263	14.0217709924708
g5168	14.6138356899578	20.4760647743852	9.02983816531767	39.6751280649606	38.3154577008259	34.4024944130618
g5169	14.9701527340312	8.91287557743574	28.3028895523991	40.8798820123765	67.6023951608138	46.3031550259135
g5170	6.64265258634448	4.21003200968667	5.13766654233592	9.58915481932582	10.4611282538439	8.39584685080674
g5171	0	0.412256351085644	0	1.11896648537	0	1.17639730646808
g5172	0.521802278038989	0	0.244594338540681	2.49517292320449	2.27715557075983	0.683650306511076
g5173	1.30802083020402	0.354655663309207	1.22626712540829	9.0523667085097	7.59150666065597	7.02096102030184
g5174	0.673238141784238	0.14546253566755	0.433922170788093	0.364450685621941	0.73450617673301	0.389142887142661
g5175	0.455709525912454	0.225056982036621	0.122064812393956	0.234946438931392	0.691730601553609	0.521798140289794
g5176	0	0	0.207099217876135	0.106298116639733	0	0.31780002449984
g5177	0	0.122878621934933	0	0	0	0
g5178	6.56138609193707	6.77335722931759	6.34351513904109	87.4171963793573	90.1556645756445	74.0397987929826
g5179	0	0.592274957726375	0.361388135193856	3.29245129026993	2.92564987460665	3.05008573513721
g5180	0.942497390956731	0.796457767113707	0.294529857533705	28.7078985742052	27.9927706013708	19.9510259879422
g5181	42.3820454256767	25.3296613928187	22.3498629722059	35.1525757298513	41.936078371396	33.4369794312498
g5182	8.28614081369594	5.85518969615428	4.98340039405469	107.936966842588	102.6980974995	81.9822560540164
g5183	0	0.470806802644177	1.14908787025073	1.23856740358124	0.992271287624936	1.41064812146829
g5184	3.97549912384401	3.36572983080497	3.57489973251486	22.7214531498335	24.4458405728774	22.5100885546058
g5185	0	0	0	0.379196347944805	0.332271422442549	0
g5186	1.69649530372212	0.94126827022529	2.82748663232357	10.6123985250616	14.5924834821456	11.4282576047436
g5187	474.638871747609	473.012580649633	430.334563582998	943.670173013278	857.810798677267	617.18347348059
g5188	0	0	0.410960210597135	2.21480851983682	0.332696503153563	0.67567595827258
g5189	0.686340234604242	0.898748039038505	0.438710938019855	8.98459425808767	7.83724923415114	11.290781082872
g5190	0.39493158145761	0.780164598541877	0.26446259436067	0.122166990254446	0.171278441250298	0.834841776763574
g5191	62.3587852919743	70.0026836254021	77.2251372559064	10.6429736151362	11.1199023730106	13.824860451244
g5192	1.73250082202833	2.79500541848402	1.89491906094157	23.5510046400064	17.4881543066375	16.3074772122322
g5193	70.6809751421951	69.6895789675121	47.8333687458534	272.196733790836	244.416335996335	198.832397226197
g5194	4.10593632762206	2.53470024704583	2.06212915945139	21.0098758270826	17.3619165169239	12.5671872741078
g5195	0.581790159313368	0.628519587258268	0.545427205574974	13.8051435896868	8.00319267667424	6.23247136834068
g5196	68.9393415837143	71.7602764480761	75.8133926390751	119.650683816953	119.68870249244	108.046120274884
g5197	5.24538873969172	5.79262538385824	5.73713269195065	36.1778219455699	43.3491046858797	30.543809583599
g5198	6.14152593065086	2.32037201851665	3.96429687969754	11.4818623854028	21.3191332684363	12.4149666769771
g5199	0.52783080243225	5.01799065596158	1.42266617192275	19.8586441706422	22.8844157928154	17.4921143138423
g5200	0.90827226047431	0.554103390804301	1.70300715129468	10.7206402002289	10.4617833353918	9.9481695818931
g5201	1.95656754620476	0.780450163914696	2.04592599719313	6.78953929488777	6.33962198304222	5.98522271617121
g5202	1.82888677569666	2.54238332602115	1.71457799244755	14.4578647094121	13.439867634454	14.8199150651176
g5203	2.73133813514347	2.52450438665546	1.30698541374658	11.972410129165	11.3149961014402	8.66563299575649
g5204	13.4656742591619	8.61379773485496	9.34378125032765	12.2065761976463	15.168918724108	18.1408018110945
g5205	1.56939005761345	4.29512373923707	2.39086298092627	44.1778218498749	42.6564218358679	34.5315545705035
g5206	0.528509248193731	0.456767319583323	3.96381159424281	2.28882525700361	1.70474885581193	2.52536060599615
g5207	2.7988750903725	1.61262983539359	2.74321026714808	3.03028566668268	3.476019652998	2.9806675565183
g5208	15.5488309069433	6.71908565487904	16.0954379540121	9.0406994832835	8.44095061861301	10.3855369350956
g5209	1.26750984924391	0.766817146254863	0.742680096986962	3.27066591068998	3.87200682130432	2.53982510332177
g5210	8.18533480410902	12.6172328119579	10.4641859208149	19.7958531922954	29.85151199185	25.8888003412175
g5211	13.452962681295	23.4197062040904	12.1166513505831	55.1745603620111	36.7204726802698	49.0408737035382
g5212	0	0.172172952827435	0	1.29411776885814	0.680383691768988	2.39511413813251
g5213	0	0	0	0	0.0646373902150046	0.0525090347025418
g5214	0.594191033373877	0.978158476839595	0.358105501430741	6.4638208185246	5.18612309178827	4.16067975923572
g5215	0	0	0	0	0	0
g5216	0	0.281867915634206	0.343974429690761	0.353104511193497	0.742580178365359	1.13108396584119
g5217	0	0	0	0	0	0
g5218	0	0	0	0	0	0
g5219	0.431710424154516	0.939680287573343	0.179878990919325	3.91234608112099	5.0967924398187	2.66171555750682
g5220	0.099511179838994	0.229341706767231	0	0	0.302100019320467	0.368122390431566
g5221	90.3664282670393	33.1196575857066	72.3383135434217	89.5212214447394	94.9178095338378	63.2187615487237
g5222	0	0	0	0	0	0.348232993878945
g5223	6.58224426752452	7.48816295327079	5.8557350879731	16.9215595345953	17.1127930903422	16.7857791687087
g5224	17.1902711367989	15.8152989386139	15.4010317897854	40.72529570292	54.4490468908587	36.7962283255687
g5225	1.79048752986944	8.01027606761081	5.82565573126707	15.5842187602248	18.7049746081409	13.1172518309073
g5226	29.6952709228399	24.003603376281	23.3431984278532	75.6296572816381	134.74717927029	124.068753014284
g5227	3.31142377817889	3.0039991001886	3.63287136132731	6.25505038107445	9.25085544083984	10.0779917296399
g5228	0.512267684918675	0.491922722364099	0.240125006773326	3.75910399525461	3.62871302276793	1.68447587736792
g5229	0	0	0	0.306776490195945	0.184329190760805	0.336920049600539
g5230	0	0.156894028536788	0	2.40768753994182	0.155001317859955	0.503669442802395
g5231	1.84978236867806	2.43609237111105	0	6.67574033292718	1.2033521335143	1.30341192567543
g5232	0	0.983482402128667	0.266707110844174	3.90145467585647	0.14394341326478	0.0584671631789373
g5233	0.236673174459741	5.72729429574238	0.147920444182699	16.3424992432626	4.07151069784092	2.28609749013085
g5234	0	0	0	0	0	0
g5235	10.4628748489476	37.786272224306	15.9774257742229	142.0080375615	90.5836050717665	64.7417388840397
g5236	0	0.212237386867234	0	0.913949540380592	1.52015850147535	1.41944915758047
g5237	1.19710689711122	2.219156803633	1.75662080904355	9.35434190795891	11.1001872035709	11.5204290400316
g5238	0.0889230525723882	0.307409147608845	0	1.60458662228662	0.404934238699882	1.31581463431075
g5239	0	0	0	0	0.312069319958042	0.063378404885968
g5240	0	0	0	0	0.314374734679022	0
g5241	2.83107675311121	2.09723591588356	2.71732280888932	9.58467464043482	10.5387344116978	9.84962751342585
g5242	2.15491037089302	1.00669964486069	0.382204637787647	10.2150984451737	8.70788329061393	9.98254762509864
g5243	1.61198508330259	0.857334076322859	0.697492178902496	2.77452189125517	2.25864405277232	1.98774249340792
g5244	0	0	0	0	0.311653781582599	0.337568068633651
g5245	10.3534581498671	9.00890994280611	9.3101705264056	39.0425444319025	39.6902141262156	33.4804728791239
g5246	0	0	0	0	0	0.155244102598819
g5247	8.95167333297656	10.057499282146	10.1405475767991	92.2874386070468	79.0364242854548	78.9240513674318
g5248	0	0	0	2.14244015634671	2.13421267448509	0.192639528528778
g5249	0	0.497013950539615	0	0	0	0
g5250	0.414496164410003	0.57316931392875	1.7875112063352	1.61555992434871	2.5796052657822	2.24891114111499
g5251	0	0.49151448773973	0.29990716613598	0	0.809308402380815	0.854688032694589
g5252	0	0	0	0.346913315789753	0.227987521886355	0.0370417328380877
g5253	0	0	0.0711744234749101	0.109595399430626	0.172859667628162	0.421274478562564
g5254	1.03716977462234	0	0	0.249538403860539	0.962097118704727	1.1368323746362
g5255	0	0	0	0	0	0
g5256	7.50582802941286	8.36287657911516	11.5103635580764	8.46725152699706	9.58239933140023	10.4813416204067
g5257	6.75331151023712	4.72485888378619	3.6630613421808	14.2403561400958	25.2613597807425	24.5661954180242
g5258	6.82904170174802	10.768635595025	7.75004858690786	20.2352960221455	23.1869687031762	22.1602814286601
g5259	0.551762623541227	1.75331884037411	0.783752190834647	3.98254850143072	4.0480690088897	3.83486769967145
g5260	0.745723010076925	0.198306347453027	0.430223970468876	2.93968865202672	3.30877069151942	2.86476048870726
g5261	0.255285717153181	0	0.0797766302856194	0.491364804069758	0.516671059533183	0.655819586982285
g5262	3.33440844029548	10.5939820983494	7.50240428947393	39.5735376793921	26.7167779713848	26.4615119565603
g5263	4.88835150418319	11.9098768673238	7.07063742770587	16.1295837857682	24.3804156217221	17.5668404846977
g5264	25.5466985118023	24.602190551711	21.0417707118789	43.4200760206945	54.5659668920719	44.5898955085301
g5265	14.5933688586661	18.8493122271732	10.3736999806037	114.593018034927	80.4515680547059	59.1762485557751
g5266	0.955549255672399	0.338805839242832	0.206729001183471	4.64222915536052	4.15608944170078	2.85508724191347
g5267	30.4166774989077	14.0713272893955	30.3888655080219	32.5308970607998	53.4157529301833	91.8507768433791
g5268	16.2268795312545	18.6131304600468	15.2126697508589	67.3728393264483	53.2167450037067	58.4678405682282
g5269	18.6002249982801	28.1674399431118	19.0579918639728	106.690287753805	90.6350246715611	91.4902033702164
g5270	1.74228896226578	2.36201378953689	2.97853963203976	6.21382968576353	3.81141492471188	4.29684100921817
g5271	9.15240335330381	16.0153492278855	8.73925691043125	52.7874869849484	76.4737059831229	53.8690316879085
g5272	56.6871790924254	62.702122577938	45.0028984087644	21.8135993659222	16.3985470678589	21.0553131887343
g5273	6.8305159562495	12.5354338878921	1.97641856819172	31.1635732011822	10.6241811142402	6.03108692926357
g5274	0.155436061653751	1.49262842168945	0.825752459448326	9.83546898388222	6.13442715643329	7.76257680810999
g5275	0	0.110190689809558	0.17929333839075	0.483137300373707	0	0
g5276	156.605447295723	169.112592431196	181.15112868967	265.340470090174	241.025886347015	171.019798650496
g5277	3.43252359701219	0.312271506709864	0.677470435044135	14.2785085288074	16.385010428377	13.8675068687223
g5278	0.863823939274628	1.06652153252048	0.636297636995985	2.09316687544002	4.91705861278428	2.89121174749914
g5279	2.3753437565233	0.377545789785737	1.84293551015193	3.31074165993138	3.54341658119689	2.67653821430781
g5280	0	0	0	0.392802805135766	0.390086649947553	0.149125658555219
g5281	0.135912360652729	0.0522058138145769	0	0.0980997162818865	0.0687680299599035	0.0279323071335249
g5282	19.8630771255208	23.5573396444059	17.2623575626214	39.6619412864714	44.0154188939411	33.7898971042255
g5283	22.7258976723305	28.0150622677771	14.8642934784105	102.138827093786	101.582975937499	84.8032384142579
g5284	0	0	0	0.768302659617951	1.38492301756528	0.750040294508497
g5285	0	0	0	0.0573385513249873	0.482332797462198	0.636722769333527
g5286	6.99881183139954	7.99301158755351	5.56545051159737	30.9864502612672	37.1353005360406	30.9764361874275
g5287	1152.26666741138	1273.24527858025	1039.89584255125	1415.93908815716	1676.02746839535	1559.79561975515
g5288	6.53805193267153	3.1594478664107	3.36129027399565	20.3377041677917	28.0439807430494	23.6661257473249
g5289	11.5496357617036	11.6407434072981	9.34704267722905	93.9088737929147	87.3574328755787	85.5121564002417
g5290	714.649985653199	1028.90842968016	731.692013709196	2476.39075934495	2645.12810284603	2350.66682570825
g5291	621.605599814366	829.184940816925	527.517547400276	2569.71808021067	3112.53807797873	2649.4160718446
g5292	2.13542723097188	1.69706291612142	0.966463016755297	16.4230590208387	21.5162407206028	16.1624012459918
g5293	0.188097070034183	0.0541880107709401	0.0661277466045482	1.91769388194014	1.65956351533039	2.65284723104578
g5294	9.70862328354183	13.073207414972	7.77233767944338	50.4963807349001	41.6441991348325	37.1482196307212
g5295	9.99567701160641	18.9840832788646	10.007226472755	36.9644363109621	33.9511189930343	29.2925400733466
g5296	2.96727975841553	4.27414917946868	1.29155897113955	19.5051564749547	18.6598150078005	18.8828443423142
g5297	508.098575925807	972.5778253191	429.64305098788	1146.94220965207	722.970030719493	700.900744414965
g889	2.92446795942193	5.39197685554594	7.67671335072771	57.8370623146008	48.8301923120692	54.9039097803051
g890	0	0.0852194183778957	0	0	0.336765453192132	0.455959747381065
g891	0.360473578399816	0.900008702564918	0.450591090052733	0.650462467105788	0.729560070036335	0.48154252689514
g892	3.85678207496965	3.71872484943053	4.50121005550285	9.99885990272427	10.3346080307698	7.47341068333773
g893	16.724979391341	16.1170920941716	16.5048815312132	62.4066027654117	78.5369506459583	78.0923257158217
g894	10.4199992492683	12.54705491311	13.7201266208753	34.2248457777746	36.6539278139785	29.2349134155092
g895	56.4428798522997	58.8148913055704	94.8443592301038	19.8294794458095	17.6885396682994	18.3833498655943
g896	3701.21083922657	4165.95004649486	5405.56571885763	1260.90825958051	614.302644158095	493.952038079751
g897	0	0.642380648293248	0.209045920574899	2.17277039717181	1.60773239674696	1.99346392808359
g898	0.828992328820006	1.35750626983125	0.695370492167012	12.7859128515707	9.00709412442567	9.30769443571516
g899	0.719965322150293	0.829645855180914	0	1.73220432874397	1.45713301147724	2.66337265668659
g900	15.3210454860136	23.9927944658582	13.5041001686027	83.9313679593704	82.3902758742729	69.8777190175864
g901	22.1643565961246	35.5517230409019	22.6990148326561	119.114281083229	113.190310058689	107.26672832082
g902	1.39577941625605	0.756900904442652	0	10.7264308786187	4.73587626134409	3.84725141480317
g903	0.954014373769659	2.33611932281865	1.00618506318475	8.00491408764689	16.2008144641791	16.3960374588989
g904	18.7496071105055	20.2461337590138	23.8467000774177	76.2781184236148	103.492376516698	65.6419193461811
g905	30.5263136965711	37.4419039642545	29.3771832433551	121.601458322807	114.26160140196	89.8989522623236
g906	0	0	0	0	0	0.15401799486262
g907	1.67828651059071	2.41744880704643	1.57339052057189	4.08835572692328	2.70672369351363	4.26834155354478
g908	0	0	0	0	0	0
g909	0	0	0	1.26863772988581	0.606352305617958	0.820963793859689
g910	0	0	0	0	0	0
g911	0	0	0	0	0	0
g912	27.5702528682519	50.8115105829199	28.0723051139336	327.68839499687	210.563646392649	186.645462346243
g913	51.5905063307209	63.3044823402158	54.5172923179384	157.028260871059	147.832587739824	138.179200639995
g914	150.792736917034	170.538314676077	182.053374460822	233.703234019708	266.230343971987	227.866327294297
g915	19.4179546855833	27.6817896503077	20.1748650611305	56.6404391090499	71.4082669816358	81.3366481399278
g916	26.1987381115801	11.0619447357455	19.4990225993053	2.16525541092997	7.13388036869066	7.15164880036215
g917	8.46773016009493	18.1530341410695	5.03269768625575	76.2948867116185	70.7418562571969	54.8281320477615
g918	46.4965379538654	79.0665346989244	46.4179055473119	280.276166174705	280.213833140809	234.918488525984
g919	0.260901139019494	1.05226515332097	0.183445753905511	8.85080206721593	11.8808116735295	8.84723926073157
g920	3.6567408654669	1.63870541663424	3.80909760415131	9.23785253184904	12.1034790596375	16.971885102863
g921	1.8439444172016	3.44449937650535	1.94705591468996	14.3460708958615	15.2322355002179	15.689027342429
g922	0.149520070943536	0	0.140174791832768	0.485647104531492	0.397179134492054	0.691400780574196
g923	0	0	0	0	0	0
g924	0	0	0	0	0	0
g925	0	0	0.916066248907112	0	0	0
g926	0	0	0	0	0	0
g927	44.0769453684699	35.3702572544864	72.1984935763021	1.68375708913244	2.56252800801617	4.92038974928387
g928	30.074712412114	35.7565376955551	28.9408867812623	108.767326451336	99.9974446305182	111.844243916414
g929	35.2481272911851	27.1062157000034	38.7099210825796	26.0127633258791	29.2087274628329	25.990024676821
g930	25.1109588495634	35.6557110872786	44.3496753894503	31.9728785272144	32.477479547326	32.3560383589846
g931	30.3814485913494	35.4228963382993	38.9009489322302	265.993289646523	184.942563418901	179.581356477241
g932	5.03982487647801	5.50720586220636	5.86530194059343	17.5612036484103	17.0147685015163	21.5904456204946
g933	8.15069473381142	10.1057286196203	6.89970433201607	6.72704554946089	6.81248682745475	6.46718417203755
g934	79.9228255320021	80.717118132621	53.6066681787768	75.2747895640495	66.4774720770292	58.6911271541992
g935	41.7479613125422	40.3868829112581	27.4346276076598	200.226093452925	186.372318103076	171.315888861681
g936	5.38845013733004	6.68697532916875	6.41172497924583	18.8481991174017	15.8865934051221	16.6112754741448
g937	5.78448105643221	8.33212132792087	9.15121186422894	14.6130625435424	16.1888246285385	14.7858177869961
g938	4.0124461417236	2.42194220631603	0	11.1707860940097	12.7611989573921	10.2489242101844
g939	2.67000126684885	1.83421815080096	1.82920401430124	5.55914725883118	7.09248454450096	4.87526191430523
g940	0	0.485869530538454	0.316226970910675	0.791262600811268	2.24003818673738	0.831874059208768
g941	0	0	0	0	0.0865897114201005	0
g942	0.161797033746612	1.4294149032221	0.808983583504959	5.76129099756084	6.75386120056099	8.08024784222992
g943	87.8826936476824	90.199672461081	81.2847013562939	259.601211696952	418.180046296987	616.740200298029
g944	0	0	0.864306451883661	0.665435743628103	0.34985349771081	0.852624280977148
g5298	17.7796605234796	8.2423950379416	11.4954476403612	35.6967249906901	33.9677838324112	59.0943775179304
g5299	12.1153196959202	16.1252420297093	10.7381068820682	29.6707968950554	31.9216558629238	37.5442841089805
g5300	0.239988440716764	0.737462982383035	0.374981203832795	0.115480288582932	0.182141626434655	0.542538874510232
g5301	0	0.160725904403358	0.196140100512269	0.100673114538037	0	0
g5302	0	0	0	0	0	0.0694557861764033
g5303	0.529871385431344	0.305296369962049	0.248376725219145	0.764908097057047	1.20645355653882	0.653385617381113
g5304	0	0	0	0	0	0
g5305	0	0.597252058211471	0.323933342470683	3.7409790965311	1.44233719308339	0.639109965236652
g5306	0	0	0	0	0	0
g5307	4.80778624553963	4.74875244502216	2.68291117441615	16.5247406268449	15.3775806326764	12.9156437573855
g5308	5.37937933639624	3.94474282025178	3.66775145138071	11.0835256042643	10.3181816066051	7.41726336914754
g5309	0	0	0	0	0	0.08670096427629
g5310	0.818676346629613	0.707545992306272	0.335784562317171	5.31818631144491	4.83482209243109	4.05382032247232
g5311	0.769040265139756	1.18159592563865	0.480649223865477	2.59038702195379	4.96120178237536	2.05466150503138
g5312	7.41378992542496	7.88604659386019	5.21281082665201	7.7180393981831	3.46262768330699	7.03227793464277
g5313	0	0	0	0	0	0.490355163527799
g5314	0	0	0	0	0	0
g5315	0	0.253650945493094	0	0.158878127225982	0	0
g5316	0	0	0	0	0	0
g5317	17.3354716398821	17.6650649412466	11.987508874723	42.6821383342839	48.4686060527169	40.8757586912637
g5318	292.615451338716	282.554313510372	213.647090392841	45.6827137469649	36.066895837093	32.1147805749662
g5319	10.0263151020634	15.7550973976474	12.1530854002794	17.1784040122319	18.2937187561611	21.3550881487695
g5320	1.07195714967066	0.195041149635469	1.37520549067549	2.89128543602189	3.46838843531853	2.53931040432254
g5321	18.9021542580435	45.0424769213021	11.5950487568819	25.7707175219606	24.662686040952	22.7687459096582
g5322	47.4605390332454	70.3404552746011	40.9725597174575	100.474951928184	102.305226816885	80.5702982703557
g5323	9.52165858206117	29.3338447872042	17.4887263912339	104.631908732026	109.135773520298	80.031709761487
g5324	0.866250411014164	0.998216220887149	0.947459530470783	13.5470380672603	12.1628140854434	10.4147097916549
g5325	23.5746503008325	22.2016922453891	25.9156101605838	89.0525774882236	94.0930778453236	79.4627963471333
g5326	11.3485733846144	5.6858395941732	10.4850744290911	10.4468088263663	22.5938187649623	13.5883300075515
g5327	45.7265684838231	36.148625213188	46.4353469802161	47.1497470162189	56.497186591566	42.3555401367817
g5328	130.417714334085	119.92319917474	183.996788449055	52.0880797952303	40.8846394640122	44.1794929448047
g5329	20.5666982400595	39.4259321149195	15.7853904976224	188.40367238769	188.945485793594	159.559993153454
g5330	5.74211115822313	3.76253532838223	3.69436574860459	21.4542897584193	31.1898416716006	30.1967208383309
g5331	47.6449020065756	48.8028387592006	60.1214159722764	41.2576667917843	21.4115358054654	26.1942038446569
g5332	463.21002645996	357.134513173847	661.465196016218	36.1852613401284	29.2050813493247	35.4763127525146
g5333	0	0	0	0	0	0
g5334	11.6720375415972	18.0720460577623	9.54829385401858	132.453511533529	107.089986934308	108.585184697222
g5335	32.3085538314345	48.337579053834	37.9624763633008	167.942003706757	158.323277307158	118.224462964344
g5336	0	0	0	0	0	0.31689202442984
g5337	8.55755735983941	6.85475585591947	4.20702262289971	53.1048124032956	56.1566365102162	44.0109938497483
g5338	70.0540701782189	110.284142147316	59.9725403900044	375.427158162344	435.31494000555	438.273733900478
g5339	42.2878885346952	34.0337102574111	31.6439362159794	404.825469766424	543.865211764564	401.25861376965
g5340	0.984207913790561	0.378047845357261	0	3.31514424192597	1.74294035082949	2.22498655450739
g5341	0	0	0	0	0	0
g5342	0.266584670056226	0.0921589664511994	0.04998452768933	1.55857959506671	1.39605699410691	1.31490466568398
g5343	0.0700238751864311	0.322765644537534	0.131294508698949	1.61735336053479	1.70065024500296	1.20885240926914
g5344	0.168309535446059	0	0.276132290501513	1.18446472827131	1.21353194416758	1.32308581628505
g5345	0.452509385650832	1.99887366510735	0.63634007664362	4.24599755123523	3.54884406408632	5.20791001264007
g5346	0.287404609805258	0.66237646716836	0.134720646856983	2.28189265487382	3.30828379731848	2.36266187832127
g5347	15.3018421903342	35.1786010263418	16.5469782363387	167.911701037607	158.90928525498	138.246188992237
g5348	75.9591732088703	98.0136434467541	82.2984189880993	329.614467947751	366.612409065753	222.385287940587
g5349	1.61581993599524	2.42208289421649	1.19462063007639	12.1368676460834	11.8546460520803	10.9666914013547
g5350	460.728428901888	699.633979219952	374.600174545029	1744.02225337599	1388.87302649441	1224.12322340237
g5351	0	0	0	0.0979163119954253	0.0257397987428276	0.062730192892743
g5352	8.35044612146095	6.6992540205554	3.76562101453067	18.1580137055619	13.4374321575764	15.5106019155377
g5353	0.193223775890377	0.890639034175	0.543440804802791	0.976264281770178	1.02654381565145	1.90611744017949
g5354	90.4756421502202	109.421070011083	71.9963911358966	120.561421280581	127.195569126867	131.935589937715
g5355	0.777908477206233	1.15253505287295	0.208367933805466	0.88233182655121	0.253029178344359	1.78144705625424
g5356	0.987359059725856	2.02271063471121	1.00278458004699	8.53215389905655	8.80505084993676	6.6456011526642
g5357	0.221302580782951	0.191262096144147	0.570544598081437	4.27286390708024	4.70287457417932	3.85455314968481
g5358	7.56881352271965	11.1558639297776	6.93073135988217	37.9238553017778	37.4723648322906	36.1387137449098
g5359	1.14915944862779	2.80609375766023	1.89816144117436	12.5799591187271	11.1720318164378	11.5724210145792
g5360	17.1533000077441	17.1069708663686	7.54353874433777	66.5423630113353	58.6076787178484	43.1111601196421
g5361	3.42459907075005	1.7100665075942	1.60527766882335	18.5387220635981	14.9883376881569	11.5777319308626
g5362	9.18475616299133	11.653063247685	7.56697178384247	45.8033595880333	40.6281583068119	37.2376729068278
g5363	3.85481432901303	2.96137478863187	3.13203050501342	27.2670613898411	32.1821486206731	18.6966294413606
g5364	58.6319505424858	75.1922209441028	50.0025533883679	151.463765901426	158.977355958386	141.624788839021
g5365	0.195725530795279	2.12010076261536	0.807366232471676	17.7437706170324	11.467893897925	10.0401433482722
g5366	38.1664785050795	42.8079919940845	24.3310823694873	186.592135596946	183.842817203005	145.582078549946
g5367	0	0	0	0	0	0
g5368	0	0	0	0	0	0
g5369	2.21011810550198	2.971279052139	2.233135793203	8.36611378778305	8.75970976948638	6.5255834939924
g5370	9.77395545716965	6.01984383262873	6.63532313798555	14.2310524483614	15.6034659979021	12.1561858551775
g5371	309.326227753477	222.478494683978	289.042641838616	162.917883325715	199.823259980176	213.701269432405
g5372	1112.83326533276	1356.76406440934	969.215721747475	2499.41429475096	3125.76584782421	2971.61478097329
g5373	935.517843073377	1301.09434261826	692.272003062209	3478.68944821568	4362.52146624814	3992.83950781598
g5374	66.4898962297962	49.5298949763058	70.0281203785658	208.030160999883	235.635562295788	177.699668367694
g5375	100.499052151422	88.5955648315649	108.362628242769	205.731966257912	250.033842506268	220.388594909789
g5376	57.9132580413958	62.6073873353043	53.9613893684072	122.731862468545	127.40938149187	111.003234601123
g5377	36.1090971328639	40.4039207525338	27.7546087828881	141.431228997449	155.580740968173	144.779323452237
g5378	222.150568677011	288.029541211508	232.881168922919	755.895845145561	772.879526139826	677.905576134219
g5379	3.77328443322373	2.98156245106093	2.22353825534412	20.601377675404	18.5122400735467	15.5371810614526
g5380	10.8725532356778	6.15054763792774	7.96907169914656	36.0992492497634	31.8070653034158	30.3485054165501
g5381	3.80319947894168	3.13041732413517	4.88981831974773	9.56862835155718	12.5355540786529	8.57551355750941
g5382	21.5115094258301	21.7054435314611	17.3075004882013	27.4614350493146	17.9102772125842	24.2164233140554
g5383	0	0	0	0	0	0
g5384	0	0	0	0	0	0.482576686948995
g5385	141.967586541656	212.370713742296	178.691490547687	392.043765898788	329.229141899469	327.914355714356
g5386	4.31706623217518	3.4259961897009	2.36725455700149	16.6676626109511	18.0515533731673	13.8357769778797
g5387	1.62914456889096	0.824193988332025	1.52732004050489	5.21982510454005	12.515342847177	10.191502293221
g5388	16.3974108943484	16.8460212889647	18.2069593371022	36.276494356656	40.8713624927747	36.9305307363218
g5389	5.06484973138885	0.986439901834351	4.68141003258291	1.08127535996197	0.487269930538234	2.02318294570057
g5390	34.6700964222776	40.9402856731583	33.5754206271899	69.0364132716592	63.9112758884864	49.8476884047495
g5391	1.2372523423111	1.54454853569566	0.483300749172659	9.89777267816746	9.31199826354239	6.80189500782204
g5392	7.16677239108909	6.65615977465645	7.22024161885747	65.7805044466	43.5955319504341	52.7603786771846
g5393	33.9062202761355	73.8793239153449	41.4997195388407	239.340644638898	122.591367346083	175.659387887483
g5394	30.9999728238954	27.5361341602629	19.4758562212675	85.8499208199576	89.4544254853551	107.44464660773
g5395	0.332939429226496	1.63055453948962	0.975406572722957	10.4535375401853	8.97041365061579	8.57019725988393
g5396	1.94872130376646	4.4560971345527	1.655648644648	12.3513625601208	12.1324343141271	9.44293177062852
g5397	4.3850604550964	2.02123470081744	1.21165906725675	1.79909681741572	1.89175384797197	1.59370932807104
g5398	4.99655838733955	7.86423180383568	5.65539227570705	21.1549004649618	26.3603308204037	21.5268678124835
g5399	1.29464796944182	0.596750587129849	0.485492037204172	2.80337854211084	8.057205364156	2.71393673315228
g5400	683.163070622671	665.087834823118	726.94520125648	323.059011744569	199.36017924885	276.467568999555
g5401	1.43004568670423	1.0662887945974	1.97156647678045	1.51792318769504	2.74529066247869	3.73424316840401
g5402	11.2765931102768	16.2089105059066	10.4605033743564	48.9214373807144	39.1888435859551	29.7132013668626
g5403	206.303332924803	199.000276342756	202.185116862431	76.9631553822915	84.5131354352981	62.2790396667838
g5404	1.69801224149663	0.602058406837484	0.979620527420871	5.09096392933267	5.45229116826313	6.36199998220009
g5405	16.3753674819327	18.5047879906288	17.3327642778828	119.262772444327	120.353558390807	100.962515491521
g5406	0	0	0.0978377354162723	0.828585725441491	0.712848700411772	0.128687116519732
g5407	8.69330169496575	9.15792771492344	7.96749270396888	10.4188254999897	7.16410319562877	7.45981225069929
g5408	0.539134871190633	0.207089146058173	0.421198292766732	2.14027169465001	0.818363601288573	1.16341477500466
g5409	0	0.180159682958593	0	0.338537271853385	0.296643840264299	0.192786022466823
g5410	1.30347897439298	0.932308634811959	0.758488434162881	4.76905315082485	3.44545270176675	4.32314436476214
g5411	0	0	0	0	0.960804556521066	0
g5412	0	0	0	0	0	0.0709724578790235
g5413	0	0	0	0	0	0.190135214657904
g5414	7.97345625468855	12.160778599705	7.3285299912569	7.61708861670116	7.17878093439603	12.6756809771936
g5415	16.1992197483816	20.0497748335388	17.6241165801413	84.733661747726	76.3476984138596	84.2168298387474
g5416	4.61528790412444	0.966979522818571	0.786695260285945	10.2965996085475	13.0559613451834	6.8552152223598
g5417	4.05537928266665	3.86045426991462	2.31420646893721	15.908251589737	19.6716080762574	21.6334520965826
g5418	0	0	0	0.293845882829836	0.463469287066399	0
g5419	2.89193231844115	0.908861827713107	3.2041232787861	0.569279427732994	1.79579531945165	0.324186214250476
g5420	0.772895103561509	2.19234223796923	1.17048788726755	12.9596401360261	9.83677150822053	8.32093574847584
g5421	0.256506671924344	0	0	3.42514680017185	0.827382788410281	2.17455537662398
g5422	0.322916383582243	0	0	1.24307577657857	0.81693539256032	0.265459287480494
g5423	0.238227227748971	0.205889324817975	0.0558343970944544	0.429873032529163	0.678018510916952	0.257038722017251
g5424	2.05077404037268	9.15736842369956	2.52340842529376	14.3396424429585	22.8604395854551	16.042164827745
g5425	0.32148568811159	1.01876849648008	0.678132544538901	6.90331052723181	5.30688640272668	3.22095099107734
g5426	0	0	0	0	0	0
g5427	0	0	0	0.420374421612088	0	0.0897711117364986
g5428	4.85605650596702	2.76846573974536	10.1114399503933	0.996168227843066	2.36651274458486	2.2691422932818
g5429	0	0	0.221032498589514	0.680698031325996	1.96832713276288	0
g5430	0.340073845567064	0.641260104606	0.115934038357929	4.81995622542534	4.24695841446659	4.32688658920744
g5431	0.443320965061696	0.830142797891415	0.675370459302085	4.51976153738129	4.54224886192299	4.13411697638929
g5432	0	0	0	0	0	0
g5433	0	0	0	0	0	0
g5434	0	0	0	0	0	0
g5435	2.01975793867625	1.22497405941339	0.79727130825256	11.3557607459679	12.3440036074407	9.11023606944111
g5436	2.10828875670072	3.38653176574434	0.539050046280456	11.5744048719999	7.56414137872197	13.5895274615655
g5437	13.0326966278341	10.4903612970109	14.5009218536287	69.5226307746948	47.3354136733127	163.316681015712
g5438	0	0	0	0	0.0707961252173417	0
g5439	64.6326585735574	81.1404170415837	74.4067354321613	14.2117660434603	17.3848342090791	20.2864492594832
g5440	10.7879001728712	14.1460122593272	36.5020906958973	1.87951482955996	4.70550844327567	3.28742027755926
g5441	1.6396197411841	2.99155273286694	0.811268594734398	10.848342129728	8.67627373831066	6.06545655975591
g5442	1.27131685762503	7.01102865153129	1.61752051087945	10.5526234556006	12.8191019240715	8.67813847820233
g5443	10.5524120865017	12.7889459898438	9.04003358833008	72.7515598577904	51.7814137098522	37.5783462598217
g5444	180.330341804026	194.960416439497	153.799698709746	333.053650165633	255.888640806594	223.823210421865
g5445	0	0	0	0	0	0
g5446	0.890964669761047	0.77002161351208	0.469843729396129	2.41157374045071	1.39467599656221	1.30464755453239
g5447	3.08605578877383	7.53573570230841	2.47986139947178	22.1686659780379	25.0391573733311	28.4047604456769
g5448	0.0622622948356637	1.93718035840244	0	1.57290308268242	0.236272955752606	0.268715223623123
g5449	0.738306980142458	0.98167120065145	0.479188687549864	5.20602367273246	4.18103923148206	4.27191458347408
[truncated: 8,949 more rows]
