# Supplementary material for: A Genomic and Transcriptomic Study on the DDT-Resistant Trichoderma hamatum FBL 587: First Genetic Data into Mycoremediation Strategies for DDT-Polluted Sites
Source: Microorganisms. 2021 Aug 7;9(8):1680. doi: 10.3390/microorganisms9081680 (PMC8401308; doi:10.3390/microorganisms9081680)
Supplement: Supplementary file 1 [file microorganisms-09-01680-s001.zip › Table S5_CAZyme_FBL587.xlsx]

## Sheet: Foglio1
Gene ID	HMMER	Hotpep	DIAMOND	Signalp	#ofTools
g8620.t1	AA2(61-242)	AA0	AA0	Y(1-20)	3
g232.t1	AA1_2(116-482)	AA1	AA1	N	3
g8014.t1	AA1_2(215-573)	AA1	AA1	N	3
g6147.t1	AA1_2(38-374)	AA1	AA1_2	Y(1-22)	3
g7291.t1	AA1_2(42-398)	AA1	AA1_2	Y(1-21)	3
g9148.t1	AA1_3(54-360)	AA1	AA1_3	Y(1-19)	3
g8267.t1	AA1_3(63-380)	AA1	AA1_3	N	3
g9822.t1	AA3_2(26-638)	AA3	AA3	N	3
g3816.t1	AA3_2(12-577)	AA3	AA3_2	N	3
g2744.t1	AA3_2(12-578)	AA3	AA3_2	N	3
g4714.t1	AA3_2(12-593)	AA3	AA3_2	N	3
g1135.t1	AA3_2(13-531)	AA3	AA3_2	N	3
g9153.t1	AA3_2(13-580)	AA3	AA3_2	N	3
g9561.t1	AA3_2(16-620)	AA3	AA3_2	N	3
g5319.t1	AA3_2(3-554)	AA3	AA3_2	N	3
g6016.t1	AA3_2(3-593)	AA3	AA3_2	N	3
g9447.t1	AA3_2(48-580)	AA3	AA3_2	N	3
g7195.t1	AA3_2(7-599)	AA3	AA3_2	N	3
g9426.t1	AA3_2(9-552)	AA3	AA3_2	N	3
g6136.t1	AA3_3(14-650)	AA3	AA3_3	N	3
g137.t1	AA3_3(8-614)	AA3	AA3_3	N	3
g9490.t1	AA5(608-1115)	AA5	AA5_1	Y(1-23)	3
g5006.t1	AA7(38-259)	AA7	AA7	N	3
g3791.t1	AA9(11-236)	AA9	AA9	N	3
g10378.t1	AA9(10-233)	AA9+CBM1	AA9+CBM1	N	3
g10397.t1	AA9(10-231)	AA9+CBM18	AA9+CBM18	Y(1-21)	3
g9883.t1	CE15(2-315)	CE15+CBM1	CBM1+CE15	N	3
g2360.t1	CE5(31-236)	CE5+CBM1	CBM1+CE5	Y(1-26)	3
g6767.t1	CE5(32-237)	CE5+CBM1	CBM1+CE5	N	3
g8698.t1	GH18(28-278)	GH18+CBM1+CBM19	CBM1+GH18	Y(1-21)	3
g6137.t1	GH18(29-273)	CBM1	CBM1+GH18	Y(1-22)	3
g3317.t1	GH18(32-325)	GH18+CBM1	CBM1+GH18	Y(1-19)	3
g4027.t1	GH18(34-334)	GH18+CBM1	CBM1+GH18	Y(1-20)	3
g4448.t1	GH18(36-352)	GH18+CBM1	CBM1+GH18	Y(1-29)	3
g7852.t1	GH5_5(97-394)	GH5+CBM1	CBM1+GH5_5	Y(1-22)	3
g3498.t1	GH5_5(98-395)	GH5+CBM1	CBM1+GH5_5	Y(1-22)	3
g10662.t1	GH5_7(63-334)	GH5+CBM1+CBM27	CBM1+GH5_7	Y(1-27)	3
g3497.t1	GH5_7(64-337)	GH5+CBM1	CBM1+GH5_7	Y(1-20)	3
g7847.t1	GH6(137-429)	GH6+CBM1	CBM1+GH6	Y(1-20)	3
g182.t1	GH7(19-445)	GH7+CBM1	CBM1+GH7	Y(1-26)	3
g124.t1	GH7(24-393)	GH7+CBM1	CBM1+GH7	Y(1-23)	3
g7973.t1	GH74(88-182)	GH74+CBM1	CBM1+GH74	Y(1-20)	3
g9196.t1	GH142(32-507)+CBM13(679-815)	GH142+CBM13	CBM13+GH142	N	3
g3852.t1	GH18(200-546)	GH18+CBM18	CBM18+CBM50+GH18	N	3
g8987.t1	GH18(2-252)	GH18+CBM18	CBM18+CBM50+GH18	N	3
g2629.t1	GH18(487-816)	GH18+CBM18	CBM18+CBM50+GH18	Y(1-17)	3
g10005.t1	GH18(597-920)	GH18+CBM18	CBM18+CBM50+GH18	N	3
g5901.t1	GH18(607-947)	GH18+CBM18	CBM18+CBM50+GH18	N	3
g5003.t1	CE4(119-251)	CE4+CBM18	CBM18+CE4+GT2	Y(1-22)	3
g6001.t1	GH16_19(105-272)	GH16+CBM18	CBM18+GH16_19	Y(1-19)	3
g1980.t1	GH18(16-302)	GH18+CBM18	CBM18+GH18	N	3
g5995.t1	GH18(7-327)	GH18+CBM18	CBM18+GH18	N	3
g5906.t1	GH13_1(58-364)+CBM20(523-611)	CBM20	CBM20+GH13_1	Y(1-23)	3
g645.t1	GH15(63-460)+CBM20(526-613)	GH15+CBM20	CBM20+GH15	N	3
g6911.t1	GH15(66-467)+CBM20(552-642)	GH15+CBM20	CBM20+GH15	N	3
g5928.t1	CBM21(322-430)	CBM21	CBM21	N	3
g2121.t1	GH62(49-317)	GH62+CBM1+CBM13	CBM22+GH62	Y(1-48)	3
g9656.t1	GH71(46-416)+CBM24(499-571)	GH71+CBM24	CBM24+GH71	Y(1-29)	3
g9108.t1	GH71(48-437)	GH71+CBM24	CBM24+GH71	Y(1-31)	3
g8228.t1	GH65(368-725)	GH65+CBM32	CBM32+GH65	Y(1-22)	3
g9999.t1	GH43_24(9-242)	GH43+CBM35	CBM35+GH43_24	N	3
g10173.t1	GH32(30-323)+CBM38(318-431)	GH32+CBM38	CBM38+GH32	N	3
g9654.t1	GH54(28-343)+CBM42(361-500)	GH54+CBM13+CBM42	CBM42+GH54	Y(1-26)	3
g2427.t1	GH54(30-346)+CBM42(367-507)	GH54+CBM13+CBM42	CBM42+GH54	Y(1-36)	3
g8351.t1	GH72(20-330)+CBM43(381-468)	GH72+CBM43	CBM43+GH72	Y(1-20)	3
g3614.t1	GH72(21-332)+CBM43(382-468)	GH72+CBM43	CBM43+GH72	Y(1-21)	3
g9606.t1	GH13_8(236-529)	GH13+CBM48	CBM48+GH13_8	N	3
g10654.t1	GH43_29(134-414)+CBM6(434-563)	GH43+CBM2+CBM22+CBM6	CBM6+GH43_29	N	3
g2321.t1	GH43_34(31-311)+CBM66(327-488)	GH43+CBM66	CBM66+GH43_34	Y(1-18)	3
g752.t1	CE16(28-321)	CE16	CE16	Y(1-22)	3
g6629.t1	CE8(4-320)	CE8	CE8	N	3
g2937.t1	CE9(18-423)	CE9	CE9	N	3
g1540.t1	GH76(23-381)	GH0+GH76	GH0	N	3
g10694.t1	GH1(165-380)	GH1	GH1	Y(1-14)	3
g2792.t1	GH1(2-457)	GH1	GH1	N	3
g4610.t1	GH1(6-443)	GH1	GH1	N	3
g7961.t1	GH10(28-321)	GH10+CBM1+CBM2	GH10	Y(1-19)	3
g4354.t1	GH10(51-344)	GH10+CBM1+CBM2	GH10	N	3
g6062.t1	GH11(44-220)	GH11+CBM1+CBM2+CBM36+CBM6+CBM60	GH11	Y(1-28)	3
g7209.t1	GH11(56-219)	GH11	GH11	Y(1-20)	3
g1466.t1	GH115(20-631)	GH115	GH115	N	3
g4051.t1	GH12(87-226)	GH12	GH12	Y(1-24)	3
g1999.t1	GH125(616-1050)	GH125	GH125	N	3
g8924.t1	GH125(93-482)	GH125	GH125	Y(1-26)	3
g6641.t1	GH127(279-600)	GH127	GH127	N	3
g3376.t1	GH128(42-281)	GH128	GH128	Y(1-19)	3
g2106.t1	GH13_40(29-379)	GH13	GH13	N	3
g2999.t1	GH13_1(59-346)	CBM20	GH13_1	Y(1-21)	3
g3040.t1	GH13_25(1091-1542)	GH133	GH13_25+GH133	N	3
g6203.t1	GH13_40(34-386)	GH13	GH13_40	N	3
g1422.t1	GH13_40(35-392)	GH13	GH13_40	N	3
g5152.t1	GH132(135-434)	GH132	GH132	Y(1-22)	3
g5743.t1	GH132(54-313)	GH132	GH132	Y(1-27)	3
g4283.t1	GH15(284-661)	GH15	GH15	N	3
g9184.t1	GH152(64-313)	GH152	GH152	N	3
g9067.t1	GH154(21-346)	GH154	GH154	N	3
g7180.t1	GH16_3(32-283)	CBM4	GH16_3	Y(1-22)	3
g3098.t1	GH16_4(143-463)	CBM6	GH16_4	N	3
g8405.t1	GH17(423-689)	GH17	GH17	N	3
g9112.t1	GH17(67-315)	GH17	GH17	N	3
g1281.t1	GH18(150-506)	GH18	GH18	Y(1-19)	3
g86.t1	GH18(15-353)	GH18+CBM12+CBM18+CBM5	GH18	N	3
g3775.t1	GH18(184-534)	GH18+CBM18+CBM5	GH18	N	3
g1263.t1	GH18(21-359)	CBM18	GH18	Y(1-19)	3
g7378.t1	GH18(26-260)	GH18	GH18	Y(1-28)	3
g9381.t1	GH18(27-266)	GH18+CBM1	GH18	Y(1-18)	3
g4903.t1	GH18(27-303)	GH18+CBM1+CBM19	GH18	Y(1-20)	3
g5697.t1	GH18(31-268)	GH18	GH18	Y(1-20)	3
g920.t1	GH18(39-293)	GH18+CBM12+CBM16+CBM5	GH18	Y(1-26)	3
g8831.t1	GH18(40-390)	GH18	GH18	Y(1-23)	3
g8072.t1	GH18(6-350)	GH18+CBM14	GH18	N	3
g945.t1	GH2(102-720)	GH2	GH2	Y(1-19)	3
g7966.t1	GH2(118-807)	GH2	GH2	N	3
g6873.t1	GH2(20-686)	GH2	GH2	N	3
g3335.t1	GH2(2-688)	GH2	GH2	N	3
g8052.t1	GH2(40-676)	GH2+CBM6	GH2	N	3
g5902.t1	GH2(43-792)	GH2	GH2	N	3
g5977.t1	GH2(4-743)	GH2	GH2	N	3
g9494.t1	GH2(56-504)	GH2+CBM42	GH2	Y(1-21)	3
g1720.t1	GH2(6-736)	GH2	GH2	N	3
g4631.t1	GH2(91-813)	GH2	GH2	N	3
g3022.t1	GH20(161-495)	GH20	GH20	N	3
g2612.t1	GH20(182-527)	GH20	GH20	Y(1-20)	3
g146.t1	GH20(213-556)	GH20	GH20	Y(1-20)	3
g5717.t1	GH27(140-373)	GH27+CBM35+CBM51	GH27	N	3
g2884.t1	GH27(16-355)	GH27+CBM35+CBM51	GH27	N	3
g9788.t1	GH28(39-348)	GH28	GH28	Y(1-18)	3
g3179.t1	GH28(55-392)	GH28	GH28	Y(1-18)	3
g1853.t1	GH28(56-375)	GH28	GH28	Y(1-20)	3
g3596.t1	GH28(81-433)	GH28	GH28	N	3
g7377.t1	GH3(108-320)	GH3	GH3	Y(1-23)	3
g5823.t1	GH3(108-331)	GH3	GH3	Y(1-21)	3
g519.t1	GH3(114-317)	GH3	GH3	Y(1-31)	3
g4331.t1	GH3(172-384)	GH3+CBM1	GH3	N	3
g8276.t1	GH3(183-432)	GH3	GH3	Y(1-30)	3
g6040.t1	GH3(262-474)	GH3+CBM6	GH3	N	3
g3582.t1	GH3(34-245)	GH3+CBM6	GH3	N	3
g3167.t1	GH3(42-253)	GH3+CBM6	GH3	N	3
g144.t1	GH3(69-291)	GH3	GH3	N	3
g3176.t1	GH3(73-279)	GH3+CBM1	GH3	N	3
g8422.t1	GH3(78-295)	GH3+CBM1	GH3	Y(1-44)	3
g9264.t1	GH3(81-304)	GH3+CBM1	GH3	N	3
g4126.t1	GH3(87-200)	GH3+CBM1	GH3	N	3
g7830.t1	GH3(90-311)	GH3+CBM1	GH3	Y(1-22)	3
g3175.t1	GH3(97-345)	GH3	GH3	Y(1-22)	3
g310.t1	GH3(99-320)	GH3+CBM1	GH3	Y(1-22)	3
g7507.t1	GH30_3(57-471)	GH30	GH30_3	Y(1-29)	3
g5460.t1	GH30_3(68-487)	GH30	GH30_3	Y(1-24)	3
g7355.t1	GH30_5(26-470)	GH30	GH30_5	Y(1-21)	3
g9882.t1	GH30_7(20-456)	GH30	GH30_7	Y(1-22)	3
g10148.t1	GH30_7(22-457)	GH30	GH30_7	Y(1-22)	3
g190.t1	GH30_7(28-445)	GH30	GH30_7	N	3
g5394.t1	GH31(208-657)	GH31	GH31	N	3
g947.t1	GH31(232-715)	GH31	GH31	N	3
g9260.t1	GH31(243-770)	GH31	GH31	N	3
g4024.t1	GH31(257-698)	GH31	GH31	N	3
g3586.t1	GH31(274-834)	GH31	GH31	N	3
g7429.t1	GH31(341-921)	GH31	GH31	N	3
g3520.t1	GH31(368-816)	GH31	GH31	N	3
g8541.t1	GH35(37-326)	GH35	GH35	N	3
g6984.t1	GH35(54-385)	GH35	GH35	N	3
g4646.t1	GH36(37-728)	GH36	GH36	Y(1-39)	3
g5799.t1	GH37(312-852)	GH37	GH37	N	3
g4061.t1	GH37(52-626)	GH37	GH37	Y(1-22)	3
g9980.t1	GH38(338-600)	GH38	GH38	N	3
g5360.t1	GH43_11(4-295)	GH43	GH43_11	N	3
g4634.t1	GH47(102-585)	GH47	GH47	N	3
g3417.t1	GH47(105-531)	GH47	GH47	N	3
g7803.t1	GH47(118-587)	GH47	GH47	N	3
g10502.t1	GH47(127-579)+AA12(610-1004)	GH47+AA12	GH47	N	3
g5645.t1	GH47(166-659)	GH47	GH47	N	3
g10681.t1	GH47(216-1087)	GH47	GH47	N	3
g8041.t1	GH47(37-579)	GH47	GH47	N	3
g1252.t1	GH47(42-509)	GH47	GH47	Y(1-20)	3
g3768.t1	GH49(7-591)	GH49	GH49	N	3
g5241.t1	GH5_12(825-1358)	GH5	GH5_12	N	3
g3659.t1	GH5_15(82-387)	GH5	GH5_15	Y(1-24)	3
g8702.t1	GH5_15(98-402)	GH5	GH5_15	N	3
g8514.t1	GH5_22(69-360)	GH5	GH5_22	N	3
g3889.t1	GH5_24(161-474)	GH5	GH5_24	N	3
g7702.t1	GH5_5(24-316)	GH5+CBM1	GH5_5	Y(1-20)	3
g10051.t1	GH5_9(408-731)	GH5	GH5_9	N	3
g10092.t1	GH51(205-618)	GH51	GH51	Y(1-21)	3
g10461.t1	GH53(1-268)	GH53	GH53	N	3
g2622.t1	GH55(110-883)	GH55	GH55	Y(1-25)	3
g550.t1	GH55(26-751)	GH0+GH55	GH55	Y(1-21)	3
g6912.t1	GH55(28-779)	GH0+GH55	GH55	Y(1-29)	3
g5626.t1	GH55(30-754)	GH55	GH55	Y(1-25)	3
g4629.t1	GH55(30-757)	GH55	GH55	Y(1-20)	3
g2336.t1	GH55(35-766)	GH0+GH55	GH55	Y(1-25)	3
g763.t1	GH55(53-767)	GH55	GH55	Y(1-21)	3
g6392.t1	GH62(24-292)	GH62+CBM1+CBM13	GH62	Y(1-40)	3
g9441.t1	GH63(588-799)	GH63	GH63	Y(1-21)	3
g9365.t1	GH64(4-374)	GH64+CBM6	GH64	N	3
g1027.t1	GH64(71-444)	GH64+CBM6	GH64	Y(1-24)	3
g6772.t1	GH64(71-445)	GH64	GH64	Y(1-27)	3
g361.t1	GH65(406-769)	GH65+CBM32	GH65	Y(1-26)	3
g4157.t1	GH67(39-717)	GH67	GH67	N	3
g10149.t1	GH67(7-682)	GH67	GH67	N	3
g7094.t1	GH71(31-217)+GH71(219-359)	GH71	GH71	Y(1-26)	3
g4505.t1	GH72(17-332)	GH72	GH72	Y(1-32)	3
g4594.t1	GH72(18-294)	GH72	GH72	N	3
g2572.t1	GH72(32-331)	GH72	GH72	Y(1-26)	3
g2033.t1	GH75(10-230)	GH75	GH75	Y(1-26)	3
g6113.t1	GH75(6-231)	GH75	GH75	Y(1-19)	3
g6283.t1	GH75(9-253)	GH75	GH75	Y(1-19)	3
g5489.t1	GH76(222-579)	GH76	GH76	N	3
g2317.t1	GH76(26-387)	GH76	GH76	Y(1-20)	3
g1669.t1	GH76(29-398)	GH76	GH76	Y(1-53)	3
g7079.t1	GH76(30-396)	GH76	GH76	Y(1-24)	3
g9409.t1	GH76(31-402)	GH76	GH76	Y(1-22)	3
g3103.t1	GH76(43-411)	GH76	GH76	Y(1-30)	3
g1426.t1	CBM67(142-316)+GH78(339-868)	GH78+CBM67	GH78	N	3
g9007.t1	GH78(22-518)	GH78	GH78	N	3
g10583.t1	GH78(255-653)	GH78	GH78	N	3
g1345.t1	GH79(36-517)	GH79	GH79	Y(1-20)	3
g1464.t1	GH81(639-1177)	GH81	GH81	N	3
g730.t1	GH81(67-713)	GH81+CBM6	GH81	Y(1-30)	3
g4020.t1	GH88(118-386)	GH88	GH88	N	3
g3352.t1	GH89(68-733)	GH89	GH89	Y(1-27)	3
g5851.t1	GH92(238-756)	GH92	GH92	Y(1-20)	3
g153.t1	GH92(255-740)	GH92	GH92	Y(1-24)	3
g5829.t1	GH92(257-757)	GH92	GH92	Y(1-18)	3
g9234.t1	GH92(259-767)	GH92	GH92	Y(1-22)	3
g5366.t1	GH92(262-769)	GH92	GH92	Y(1-26)	3
g1488.t1	GH92(265-784)	GH92	GH92	N	3
g7846.t1	GH92(342-846)	GH92	GH92	Y(1-24)	3
g6095.t1	GH92(342-848)	GH92	GH92	Y(1-32)	3
g7495.t1	GH95(16-791)	GH95	GH95	N	3
g1051.t1	GH95(17-774)	GH95	GH95	N	3
g3838.t1	GH95(27-772)	GH95	GH95	Y(1-21)	3
g3182.t1	GH95(28-769)+GH43_13(840-1146)	GH43+GH95+CBM51	GH95	N	3
g9413.t1	GT2_Glyco_trans_2_3(361-572)	GT0	GT0	N	3
g7816.t1	GT2_Glyco_trans_2_3(513-721)	GT0	GT0	N	3
g6141.t1	GT1(196-525)	GT1	GT1	N	3
g2237.t1	GT1(253-578)	GT1	GT1	N	3
g10557.t1	GT1(258-570)	GT1	GT1	N	3
g10428.t1	GT1(351-657)	GT1	GT1	N	3
g7363.t1	GT1(939-1356)	GT1	GT1	N	3
g2740.t1	GT15(114-411)	GT15	GT15	N	3
g5290.t1	GT15(75-352)	GT15	GT15	N	3
g4882.t1	GT15(93-363)	GT15	GT15	N	3
g4063.t1	GT17(72-365)	GT17	GT17	N	3
g803.t1	GT2_Chitin_synth_1(213-381)+GT2_Chitin_synth_2(358-569)	GT2	GT2	N	3
g1319.t1	GT2_Chitin_synth_1(238-400)+GT2_Chitin_synth_2(378-584)	GT2	GT2	N	3
g1985.t1	GT2_Chitin_synth_1(522-684)+GT2_Chitin_synth_2(662-874)	GT2	GT2	N	3
g10508.t1	GT2_Chitin_synth_2(1048-1313)	GT2	GT2	N	3
g9747.t1	GT2_Chitin_synth_2(1205-1711)	GT2	GT2	N	3
g8330.t1	GT2_Chitin_synth_2(1-239)	GT2	GT2	N	3
g7327.t1	GT2_Chitin_synth_2(656-1179)	GT2	GT2	N	3
g6182.t1	GT2_Glycos_transf_2(12-181)	GT2	GT2	N	3
g4242.t1	GT20(11-474)	GT20+CBM20	GT20	N	3
g2839.t1	GT20(158-614)	GT20	GT20	N	3
g1024.t1	GT20(178-606)	GT20	GT20	N	3
g1387.t1	GT21(51-359)	GT21	GT21	N	3
g1121.t1	GT22(16-407)	GT22	GT22	N	3
g2460.t1	GT22(26-517)	GT22	GT22	N	3
g2852.t1	GT22(43-473)	GT22	GT22	N	3
g3142.t1	GT22(5-401)	GT22	GT22	N	3
g5543.t1	GT24(1189-1436)	GT24	GT24	Y(1-24)	3
g407.t1	GT3(17-657)	GT3	GT3	N	3
g8325.t1	GT32(109-188)	GT32	GT32	N	3
g3626.t1	GT32(114-194)	GT32	GT32	N	3
g6645.t1	GT32(115-196)	GT32	GT32	Y(1-32)	3
g684.t1	GT32(94-178)	GT32	GT32	N	3
g5500.t1	GT33(52-465)	GT33	GT33	N	3
g2700.t1	GT34(216-480)	GT34	GT34	N	3
g9144.t1	GT34(66-294)	GT34	GT34	N	3
g10078.t1	GT35(163-877)	GT35	GT35	N	3
g5516.t1	GT35(163-878)	GT35	GT35	N	3
g5640.t1	GT39(221-465)	GT39	GT39	N	3
g2677.t1	GT39(64-302)	GT39	GT39	N	3
g1804.t1	GT39(66-311)	GT39	GT39	N	3
g6411.t1	GT4(218-354)	GT4	GT4	N	3
g8001.t1	GT4(228-406)	GT4	GT4	N	3
g3541.t1	GT4(327-484)	GT4	GT4	N	3
g5544.t1	GT48(837-1617)	GT48	GT48	N	3
g4726.t1	GT50(136-401)	GT50	GT50	N	3
g4846.t1	GT57(16-491)	GT57	GT57	N	3
g7469.t1	GT57(67-558)	GT57	GT57	N	3
g4874.t1	GT58(26-389)	GT58	GT58	N	3
g6104.t1	GT59(161-674)	GT59	GT59	N	3
g8719.t1	GT62(74-338)	GT62	GT62	Y(1-40)	3
g8094.t1	GT62(84-347)	GT62	GT62	N	3
g2560.t1	GT62(99-362)	GT62	GT62	N	3
g6471.t1	GT66(22-664)	GT66	GT66	N	3
g2132.t1	GT69(101-342)	GT69	GT69	N	3
g5940.t1	GT69(177-417)	GT69	GT69	N	3
g5639.t1	GT69(63-318)	GT69	GT69	N	3
g2115.t1	GT71(155-427)	GT71	GT71	N	3
g1247.t1	GT76(16-416)	GT76	GT76	N	3
g10167.t1	GT8(100-278)	GT8	GT8	N	3
g3446.t1	GT8(53-300)	GT8	GT8	N	3
g8290.t1	GT8(7-282)	GT8	GT8	N	3
g6247.t1	GT8(9-223)	GT8	GT8	N	3
g2414.t1	GT90(1097-1364)	GT90	GT90	N	3
g9846.t1	GT90(282-549)	GT90	GT90	N	3
g1724.t1	GT90(349-614)	GT90	GT90	N	3
g3628.t1	GT90(362-647)	GT90	GT90	N	3
g4042.t1	GT90(366-644)	GT90	GT90	N	3
g2260.t1	GT90(665-933)	GT90	GT90	N	3
g648.t1	PL20(24-257)	PL20	PL20	Y(1-21)	3
g1149.t1	AA2(129-231)	N	AA0	N	2
g3149.t1	AA3_1(212-736)	N	AA0	N	2
g2919.t1	N	AA1	AA1	Y(1-26)	2
g8936.t1	N	AA1	AA1	Y(1-20)	2
g8631.t1	N	AA1	AA1	N	2
g6632.t1	N	AA1	AA1	Y(1-21)	2
g9105.t1	AA14(18-286)	N	AA14	Y(1-18)	2
g880.t1	AA14(25-287)	N	AA14	Y(1-27)	2
g5282.t1	AA2(83-335)	N	AA2	N	2
g10377.t1	N	AA9+CBM1+CBM2	CBM1	Y(1-20)	2
g183.t1	N	CBM1	CBM1	N	2
g10800.t1	GH18(1-183)	N	CBM18+GH18	N	2
g10725.t1	N	GH27+CBM35	CBM35+GH27	N	2
g5306.t1	N	CBM48	CBM48	N	2
g8989.t1	CBM66(336-489)	N	CBM66	N	2
g6539.t1	CE4(45-175)	N	CE4	N	2
g768.t1	CE5(78-244)	N	CE5	Y(1-18)	2
g1983.t1	N	GH0	GH0	N	2
g4010.t1	GH106(41-1019)	N	GH106	Y(1-21)	2
g962.t1	GH12(178-319)	N	GH12	N	2
g3658.t1	GH128(42-263)	N	GH128	Y(1-31)	2
g6919.t1	GH128(44-255)	N	GH128	Y(1-30)	2
g4019.t1	GH154(21-364)	N	GH154	N	2
g1474.t1	GH16_3(52-237)	N	GH16	N	2
g9306.t1	GH16_1(112-343)	N	GH16_1	N	2
g5484.t1	GH16_1(3-187)	N	GH16_1	N	2
g2701.t1	GH16_1(63-294)	N	GH16_1	Y(1-22)	2
g6153.t1	GH16_18(68-223)	N	GH16_18	Y(1-20)	2
g2681.t1	GH16_18(70-226)	N	GH16_18	Y(1-24)	2
g9231.t1	GH16_18(70-227)	N	GH16_18	Y(1-22)	2
g2494.t1	GH16_22(103-320)	N	GH16_22	Y(1-28)	2
g9364.t1	GH16_23(117-300)	N	GH16_23	Y(1-26)	2
g4304.t1	GH16_3(31-281)	N	GH16_3	Y(1-21)	2
g8963.t1	N	GH17	GH17	Y(1-20)	2
g6189.t1	N	GH17	GH17	Y(1-20)	2
g3516.t1	GH18(13-229)	N	GH18	N	2
g1521.t1	GH18(19-342)	N	GH18	N	2
g8458.t1	GH18(37-233)	N	GH18	Y(1-19)	2
g2214.t1	GH18(536-863)	N	GH18	N	2
g6127.t1	N	GH27+CBM35	GH27	N	2
g8220.t1	GH28(120-437)	N	GH28	Y(1-47)	2
g2938.t1	GH3(82-307)	N	GH3	N	2
g1423.t1	GH32(11-337)	N	GH32	N	2
g9513.t1	GH32(53-420)	N	GH32	Y(1-23)	2
g9734.t1	N	GH36	GH36	N	2
g1473.t1	GH55(26-719)	N	GH55	Y(1-25)	2
g27.t1	GH71(194-577)	N	GH71	Y(1-22)	2
g9832.t1	GH78(344-882)	N	GH78	N	2
g1492.t1	GH79(23-433)	N	GH79	Y(1-20)	2
g7913.t1	GH93(5-308)	N	GH93	N	2
g6893.t1	GH95(3-773)	N	GH95	N	2
g7157.t1	GT1(12-184)	N	GT1	N	2
g9536.t1	GT1(180-510)	N	GT1	Y(1-28)	2
g3028.t1	GT1(262-450)	N	GT1	N	2
g7324.t1	GT1(314-501)	N	GT1	N	2
g2523.t1	GT1(6-421)	N	GT1	N	2
g2811.t1	GT109(3-408)	N	GT109	N	2
g4830.t1	GT2_Chitin_synth_1(116-275)	N	GT2	N	2
g10568.t1	GT2_Chitin_synth_2(180-481)	N	GT2	N	2
g5002.t1	GT2_Chitin_synth_2(302-656)	N	GT2	N	2
g10740.t1	GT2_Glyco_tranf_2_3(63-298)	N	GT2	N	2
g961.t1	GT2_Glyco_trans_2_3(299-487)	N	GT2	N	2
g9496.t1	GT2_Glycos_transf_2(123-281)	N	GT2	N	2
g8410.t1	GT20(154-626)	N	GT20	N	2
g8373.t1	GT20(194-580)	N	GT20	N	2
g8926.t1	N	GT31	GT31	N	2
g570.t1	N	GT31	GT31	N	2
g10405.t1	N	GT31	GT31	N	2
g10251.t1	N	GT31	GT31	N	2
g8012.t1	N	GT31	GT31	N	2
g9056.t1	N	GT31	GT31	N	2
g3084.t1	N	GT31	GT31	N	2
g9825.t1	N	GT31	GT31	N	2
g8324.t1	N	GT32	GT32	N	2
g6289.t1	GT4(248-404)	N	GT4	N	2
g931.t1	GT4(449-618)	N	GT4	N	2
g5116.t1	N	GT41	GT41	N	2
g3645.t1	GT69(202-456)	N	GT69	N	2
g4933.t1	AA11(18-215)	AA11	N	Y(1-20)	2
g1665.t1	AA11(27-215)	AA11	N	Y(1-19)	2
g3311.t1	AA11(39-219)	AA11	N	N	2
g2269.t1	AA6(4-198)	AA6	N	N	2
g1663.t1	CE16(25-316)	CE16	N	Y(1-34)	2
g1820.t1	CE3(32-143)	CE3	N	N	2
g135.t1	CE4(80-209)	CE4+CBM18	N	Y(1-23)	2
g7962.t1	CE5(22-227)	CE5+CBM1	N	Y(1-23)	2
g10721.t1	CE5(47-224)	CE5	N	Y(1-23)	2
g3178.t1	CE8(29-307)	CE8	N	Y(1-43)	2
g1561.t1	CE8(33-303)	CE8	N	Y(1-20)	2
g9483.t1	GH11(57-221)	GH11	N	Y(1-25)	2
g1852.t1	GH11(57-225)	GH11	N	Y(1-20)	2
g9125.t1	GH114(90-286)	GH114	N	N	2
g6628.t1	GH12(98-245)	GH12	N	Y(1-35)	2
g10790.t1	GH128(45-278)	GH128	N	Y(1-21)	2
g2425.t1	GH25(26-209)	GH25	N	Y(1-21)	2
g6085.t1	GH75(8-228)	GH75	N	Y(1-19)	2
g4335.t1	GH75(8-250)	GH75	N	Y(1-20)	2
g138.t1	GH75(9-231)	GH75	N	N	2
g3571.t1	GH76(21-388)	GH76	N	Y(1-20)	2
g3433.t1	GT32(78-154)	GT32	N	N	2
g1551.t1	GT64(102-346)	GT64	N	N	2
g557.t1	GT64(99-344)	GT64	N	N	2
g6648.t1	GT8(59-308)	GT8	N	N	2
g5850.t1	PL20(23-242)	PL20	N	Y(1-25)	2
g6114.t1	PL7_4(30-241)	PL7	N	Y(1-19)	2
g9400.t1	PL7_4(30-249)	PL7	N	Y(1-26)	2
g4159.t1	PL1_4(126-308)	N	PL1_4	Y(1-25)	2
g230.t1	PL38(80-355)	N	PL38	Y(1-20)	2
g4017.t1	PL38(835-1119)	N	PL38	N	2
g6287.t1	PL8_4(793-1035)	N	PL8_4	N	2
g6049.t1	N	N	AA0	N	1
g402.t1	N	N	AA1	N	1
g672.t1	N	N	AA1	N	1
g3957.t1	N	N	AA1_3	N	1
g4918.t1	N	N	AA3_2	N	1
g5081.t1	N	N	AA3_2	N	1
g6634.t1	N	N	AA3_2	N	1
g8806.t1	N	N	AA3_2	N	1
g5627.t1	N	N	AA4	N	1
g2976.t1	N	N	CBM1+GH5_5	N	1
g3982.t1	N	N	CBM12	Y(1-27)	1
g9198.t1	N	N	CBM12	Y(1-28)	1
g4573.t1	N	N	CBM13	Y(1-21)	1
g9402.t1	N	N	CBM13+GT27	N	1
g2927.t1	N	N	CBM18+CBM50+GH18	Y(1-23)	1
g8437.t1	N	N	CBM18+CBM50+GH18	N	1
g8601.t1	N	N	CBM18+CBM50+GH18	N	1
g8988.t1	N	N	CBM18+CBM50+GH18	N	1
g45.t1	N	N	CBM18+GH18	N	1
g122.t1	N	N	CBM18+GH18	N	1
g1456.t1	N	N	CBM18+GH18	N	1
g3434.t1	N	N	CBM18+GH18	N	1
g3697.t1	N	N	CBM18+GH18	N	1
g4065.t1	N	N	CBM18+GH18	N	1
g4885.t1	N	N	CBM18+GH18	N	1
g6950.t1	N	N	CBM18+GH18	N	1
g7820.t1	N	N	CBM18+GH18	N	1
g9155.t1	N	N	CBM18+GH18	N	1
g9688.t1	N	N	CBM18+GH18	N	1
g9219.t1	N	N	CBM20+GH15	Y(1-25)	1
g4480.t1	N	N	CBM24	N	1
g2848.t1	N	N	CBM43	N	1
g1147.t1	N	N	CBM48+GH13_8	N	1
g2044.t1	N	N	CBM48+GH13_8	N	1
g3719.t1	N	N	CBM48+GH13_8	N	1
g3740.t1	N	N	CBM48+GH13_8	N	1
g3832.t1	N	N	CBM48+GH13_8	N	1
g8825.t1	N	N	CBM48+GH13_8	N	1
g9630.t1	N	N	CBM48+GH13_8	N	1
g10512.t1	N	N	CBM48+GH13_8	N	1
g1067.t1	N	N	CBM50	N	1
g3375.t1	N	N	CBM50	N	1
g8020.t1	N	N	CBM50	N	1
g8100.t1	N	N	CBM50	N	1
g9854.t1	N	N	CBM50	N	1
g1101.t1	N	N	CBM66+GH43_34	N	1
g10075.t1	N	N	CE1	N	1
g1573.t1	N	N	CE3	N	1
g4036.t1	N	N	CE3	N	1
g4052.t1	N	N	CE3	N	1
g6540.t1	N	N	CE4	N	1
g6381.t1	N	N	CE5	N	1
g458.t1	N	N	CE8	N	1
g6278.t1	N	N	CE8	N	1
g6599.t1	N	N	GH0	Y(1-24)	1
g7972.t1	N	N	GH0	Y(1-31)	1
g2149.t1	N	N	GH1+GH95	N	1
g1917.t1	N	N	GH10	N	1
g3770.t1	N	N	GH115	N	1
g2476.t1	N	N	GH12	N	1
g6879.t1	N	N	GH12	N	1
g3042.t1	N	N	GH13_25+GH133	N	1
g2704.t1	N	N	GH131	N	1
g4570.t1	N	N	GH132	N	1
g9185.t1	N	N	GH152	Y(1-36)	1
g5483.t1	N	N	GH16_1	N	1
g5760.t1	N	N	GH17	Y(1-19)	1
g85.t1	N	N	GH18	Y(1-22)	1
g1470.t1	N	N	GH18	N	1
g3120.t1	N	N	GH18	N	1
g3121.t1	N	N	GH18	N	1
g3641.t1	N	N	GH18	N	1
g5527.t1	N	N	GH18	N	1
g7075.t1	N	N	GH18	N	1
g8073.t1	N	N	GH18	N	1
g8593.t1	N	N	GH18	N	1
g9379.t1	N	N	GH18	N	1
g10326.t1	N	N	GH18	N	1
g10457.t1	N	N	GH18	N	1
g9046.t1	N	N	GH19	Y(1-36)	1
g2800.t1	N	N	GH2	N	1
g4224.t1	N	N	GH2	Y(1-21)	1
g5953.t1	N	N	GH2	N	1
g151.t1	N	N	GH20	N	1
g981.t1	N	N	GH23	N	1
g4016.t1	N	N	GH27	Y(1-24)	1
g5714.t1	N	N	GH27	Y(1-21)	1
g5903.t1	N	N	GH27	Y(1-29)	1
g7504.t1	N	N	GH27	Y(1-25)	1
g7610.t1	N	N	GH27	N	1
g8119.t1	N	N	GH27	Y(1-23)	1
g9530.t1	N	N	GH27	N	1
g10312.t1	N	N	GH27	N	1
g8122.t1	N	N	GH28	N	1
g9138.t1	N	N	GH28	N	1
g2024.t1	N	N	GH3	N	1
g104.t1	N	N	GH31	N	1
g1021.t1	N	N	GH31	N	1
g1153.t1	N	N	GH31	N	1
g2825.t1	N	N	GH31	N	1
g5780.t1	N	N	GH31	N	1
g6871.t1	N	N	GH31	N	1
g8070.t1	N	N	GH31	N	1
g9690.t1	N	N	GH31	N	1
g10185.t1	N	N	GH31	N	1
g10361.t1	N	N	GH31	N	1
g2025.t1	N	N	GH36	N	1
g10636.t1	N	N	GH36	N	1
g8038.t1	N	N	GH37	N	1
g8129.t1	N	N	GH42	Y(1-40)	1
g1081.t1	N	N	GH43_11	Y(1-19)	1
g5815.t1	N	N	GH43_11	N	1
g2551.t1	N	N	GH43_21	N	1
g2972.t1	N	N	GH43_30	N	1
g3647.t1	N	N	GH47	N	1
g4760.t1	N	N	GH47	N	1
g4970.t1	N	N	GH47	N	1
g6376.t1	N	N	GH47	N	1
g6420.t1	N	N	GH47	N	1
g9663.t1	N	N	GH47	N	1
g6631.t1	N	N	GH5_15	N	1
g8462.t1	N	N	GH51	N	1
g1289.t1	N	N	GH55	N	1
g3257.t1	N	N	GH6	N	1
g8755.t1	N	N	GH6	N	1
g6782.t1	N	N	GH64	N	1
g10507.t1	N	N	GH64	N	1
g3228.t1	N	N	GH71	N	1
g4110.t1	N	N	GH71	N	1
g5018.t1	N	N	GH71	Y(1-33)	1
g7112.t1	N	N	GH72	N	1
g8307.t1	N	N	GH72	N	1
g3107.t1	N	N	GH76	N	1
g10538.t1	N	N	GH76	N	1
g5911.t1	N	N	GH78	N	1
g8872.t1	N	N	GH78	N	1
g2529.t1	N	N	GH78+GH79	N	1
g1463.t1	N	N	GH81	N	1
g2330.t1	N	N	GH93	N	1
g999.t1	N	N	GT0	N	1
g3769.t1	N	N	GT0	N	1
g4353.t1	N	N	GT0	N	1
g8156.t1	N	N	GT0	N	1
g8305.t1	N	N	GT0	N	1
g9182.t1	N	N	GT0	N	1
g722.t1	N	N	GT1	N	1
g7273.t1	N	N	GT13	N	1
g8723.t1	N	N	GT13	N	1
g4179.t1	N	N	GT15	N	1
g3026.t1	N	N	GT2	N	1
g4865.t1	N	N	GT2	N	1
g5860.t1	N	N	GT2	N	1
g5942.t1	N	N	GT2	Y(1-54)	1
g9055.t1	N	N	GT2	N	1
g741.t1	N	N	GT22	N	1
g3547.t1	N	N	GT22	N	1
g4663.t1	N	N	GT22	N	1
g4544.t1	N	N	GT30	N	1
g7225.t1	N	N	GT31	N	1
g8011.t1	N	N	GT31	N	1
g9815.t1	N	N	GT31	N	1
g10000.t1	N	N	GT34	N	1
g8594.t1	N	N	GT4	N	1
g4847.t1	N	N	GT57	N	1
g4873.t1	N	N	GT58	N	1
g4311.t1	N	N	GT7	N	1
g6334.t1	N	N	GT7	N	1
g7077.t1	N	N	GT8	N	1
g7172.t1	N	N	GT8	N	1
g10545.t1	N	N	GT8	N	1
g10262.t1	N	N	GT90	N	1
g4520.t1	N	N	GT95	N	1
g6764.t1	AA2(69-247)	N	N	Y(1-24)	1
g3629.t1	AA2(72-287)	N	N	N	1
g2145.t1	AA3_2(122-452)	N	N	N	1
g7511.t1	AA7(115-336)	N	N	Y(1-30)	1
g8873.t1	AA7(116-348)	N	N	Y(1-22)	1
g5082.t1	AA7(121-321)	N	N	N	1
g1655.t1	AA7(127-311)	N	N	Y(1-20)	1
g1173.t1	AA7(129-354)	N	N	Y(1-27)	1
g5461.t1	AA7(129-577)	N	N	Y(1-32)	1
g6018.t1	AA7(130-546)	N	N	Y(1-18)	1
g6206.t1	AA7(131-311)	N	N	Y(1-23)	1
g4386.t1	AA7(175-365)	N	N	N	1
g9475.t1	AA7(19-241)	N	N	N	1
g7563.t1	AA7(198-408)	N	N	Y(1-44)	1
g3620.t1	AA7(310-507)	N	N	Y(1-18)	1
g9587.t1	AA7(311-695)	N	N	N	1
g1740.t1	AA7(31-232)	N	N	N	1
g3123.t1	AA7(32-209)	N	N	N	1
g1862.t1	AA7(35-214)	N	N	N	1
g2886.t1	AA7(37-467)	N	N	N	1
g6355.t1	AA7(41-249)	N	N	N	1
g2752.t1	AA7(41-489)	N	N	N	1
g1379.t1	AA7(41-497)	N	N	N	1
g366.t1	AA7(56-282)	N	N	N	1
g5890.t1	AA7(58-252)	N	N	Y(1-45)	1
g3172.t1	AA7(624-836)	N	N	N	1
g6043.t1	AA7(6-249)	N	N	N	1
g9154.t1	AA7(64-275)	N	N	N	1
g10615.t1	AA7(64-498)	N	N	Y(1-24)	1
g8578.t1	AA7(64-498)	N	N	Y(1-24)	1
g3444.t1	AA7(78-498)	N	N	Y(1-66)	1
g5897.t1	CBM66(281-438)+CBM66(451-604)	N	N	Y(1-19)	1
g2511.t1	CE1(24-281)	N	N	N	1
g32.t1	CE1(49-265)	N	N	Y(1-19)	1
g5682.t1	CE5(28-222)	N	N	Y(1-20)	1
g5471.t1	CE5(65-179)	N	N	Y(1-25)	1
g4910.t1	GH128(211-428)	N	N	Y(1-20)	1
g9639.t1	GH16_1(1-198)	N	N	N	1
g3402.t1	GH16_1(62-305)	N	N	Y(1-21)	1
g6509.t1	GH16_18(85-242)	N	N	Y(1-21)	1
g1851.t1	GH16_21(61-214)	N	N	Y(1-21)	1
g10618.t1	GH16_3(20-151)	N	N	N	1
g4031.t1	GH16_3(29-279)	N	N	Y(1-18)	1
g4009.t1	GH28(38-243)	N	N	N	1
g7338.t1	GH43_30(61-338)	N	N	Y(1-21)	1
g6442.t1	GH5_31(42-313)	N	N	Y(1-24)	1
g7850.t1	GH79(41-451)	N	N	Y(1-20)	1
g9414.t1	GH93(43-297)	N	N	Y(1-35)	1
g9009.t1	GH99(102-397)	N	N	Y(1-28)	1
g5356.t1	GT109(17-420)	N	N	N	1
g4180.t1	GT15(45-380)	N	N	N	1
g8749.t1	GT2_Glyco_trans_2_3(267-542)	N	N	N	1
g558.t1	GT32(225-302)	N	N	N	1
g9101.t1	N	GH0	N	Y(1-27)	1
g6079.t1	N	GH0	N	Y(1-25)	1
g588.t1	N	GH0	N	Y(1-28)	1
g5849.t1	N	GH0	N	Y(1-25)	1
g8881.t1	N	GH0	N	Y(1-26)	1
g3288.t1	N	GH18+CBM19	N	Y(1-18)	1
g6088.t1	N	GH45+CBM1	N	Y(1-27)	1
g9997.t1	N	GH88	N	N	1
g10630.t1	N	PL0	N	Y(1-26)	1
g10873.t1	N	GT31	N	N	1
g7845.t1	N	GT32	N	N	1
g6741.t1	N	GT34	N	N	1
g3529.t1	N	GT87	N	N	1
g2577.t1	N	CBM18	N	N	1
g924.t1	N	CBM5	N	Y(1-24)	1
g4728.t1	N	CBM5	N	N	1
g6958.t1	N	CBM57	N	N	1
g9754.t1	N	CBM57	N	N	1
g7860.t1	N	CBM57	N	N	1
g889.t1	N	CBM57	N	N	1
g6993.t1	N	CBM57	N	N	1
g2043.t1	N	CBM57	N	N	1
g5747.t1	N	CBM57	N	N	1
g3181.t1	PL1_2(70-241)	N	N	Y(1-33)	1
g4334.t1	PL7_4(31-248)	N	N	Y(1-21)	1
g10890.t1	PL7_4(33-242)	N	N	Y(1-25)	1
