# Supplementary material for: A Genomic and Transcriptomic Study on the DDT-Resistant Trichoderma hamatum FBL 587: First Genetic Data into Mycoremediation Strategies for DDT-Polluted Sites
Source: Microorganisms. 2021 Aug 7;9(8):1680. doi: 10.3390/microorganisms9081680 (PMC8401308; doi:10.3390/microorganisms9081680)
Supplement: Supplementary file 1 [file microorganisms-09-01680-s001.zip › Table S6_SM FBL587.xlsx]

## Sheet: Foglio1
Region	Type	From	To	Most similar known cluster		Similarity
Region 174.1	NRPS	4.502	62.245
Region 179.1	NRPS	16.297	65.843
Region 221.1	NRPS	28.238	57.612	dimethylcoprogen	NRP	1
Region 369.1	NRPS	1	33.911
Region 4.1	NRPS-like	108.675	152.532
Region 13.1	NRPS-like	102.897	147.111	nivalenol / deoxynivalenol / 3-acetyldeoxynivalenol / 15-acetyldeoxynivalenol / neosolaniol / calonectrin / apotrichodiol / isotrichotriol / 15-decalonectrin / T-2 toxin / 3-acetyl T-2 toxin / trichodiene	Terpene	0.12
Region 40.1	NRPS-like	20.395	63.19
Region 262.1	NRPS-like	1	24.707
Region 476.1	NRPS-like	1	23.056
Region 134.1	NRPS-like,T1PKS	1	64.818	leucinostatin A / leucinostatin B	Polyketide	0.15
Region 132.1	NRPS,NRPS-like	1	35.732	dimethylcoprogen	NRP	1
Region 2.1	NRPS,T1PKS	212.848	295.319	BII-rafflesfungin	NRP	0.3
Region 21.2	T1PKS	128.692	162.673
Region 64.1	T1PKS	73.464	119.369
Region 77.1	T1PKS	58.765	106.262	neurosporin A	Polyketide	0.26
Region 89.1	T1PKS	71.133	100.383
Region 277.1	T1PKS	10.763	48.154
Region 297.1	T1PKS	8.345	45.063
Region 397.1	T1PKS	1	27.813	alternariol	Terpene	1
Region 708.1	T1PKS	1	10.756
Region 395.1	T1PKS,NRPS	1	30.695
Region 21.1	terpene	69.042	91.415	clavaric acid	Terpene	1
Region 51.1	terpene	1	14.972
Region 126.1	terpene	4.917	26.698	squalestatin S1	Terpene	0.4
Region 218.1	terpene	29.885	51.071
Region 290.1	terpene	1	17.804
Region 435.1	terpene	5.094	25.843
