# Supplementary material for: A Genomic and Transcriptomic Study on the DDT-Resistant Trichoderma hamatum FBL 587: First Genetic Data into Mycoremediation Strategies for DDT-Polluted Sites
Source: Microorganisms. 2021 Aug 7;9(8):1680. doi: 10.3390/microorganisms9081680 (PMC8401308; doi:10.3390/microorganisms9081680)
Supplement: Supplementary file 1 [file microorganisms-09-01680-s001.zip › Table S7_SM CBS 433.37.xlsx]

## Sheet: Foglio1
Region	Type	From	To	Most similar known cluster		Similarity
Region 1.4	NRPS	2,200,941	2,250,372	enniatin	NRP	1
Region 5.4	NRPS	2,097,663	2,141,451
Region 6.1	NRPS	71.103	112.599	dimethylcoprogen	NRP	1
Region 6.3	NRPS	1,607,482	1,672,219
Region 8.3	NRPS	1,720,352	1,765,316
Region 10.1	NRPS	91.998	146.745
Region 11.1	NRPS	25.415	83.906
Region 28.1	NRPS	57.426	84.71
Region 29.1	NRPS	7.67	64.482
Region 30.1	NRPS	14.837	58.326
Region 5.5	NRPS,T1PKS	2,311,829	2,378,501	cyclochlorotine / hydroxy-cyclochlorotine / cyclotine / cyclochlorotine B / deoxy-Cyclochlorotine	NRP	0.25
Region 16.1	NRPS,T1PKS	1	39.482
Region 1.2	NRPS-like	556.704	597.743
Region 3.1	NRPS-like	820.371	864.24
Region 4.1	NRPS-like	2,237,614	2,278,685
Region 4.2	NRPS-like	2,755,272	2,798,561
Region 8.1	NRPS-like	35.387	79.266
Region 13.4	NRPS-like	618.611	662.093
Region 16.2	NRPS-like	154.137	195.479
Region 16.3	NRPS-like	325.31	368.968
Region 21.2	NRPS-like	80.704	124.537
Region 24.1	NRPS-like	25.995	69.222
Region 1.1	NRPS-like,T1PKS,NRPS	40.423	148.051	fusaric acid	Polyketide	0.54
Region 2.1	T1PKS	332.108	379.228
Region 5.1	T1PKS	1,656,802	1,700,108
Region 6.4	T1PKS	1,679,200	1,725,016
Region 13.2	T1PKS	384.835	432.283	neurosporin A	Polyketide	0.26
Region 15.1	T1PKS	111.358	157.473
Region 15.2	T1PKS	813.415	861.022	leucinostatin A / leucinostatin B	Polyketide	0.1
Region 16.4	T1PKS	424.348	474.074
Region 18.1	T1PKS	487.468	535.825
Region 21.1	T1PKS	1	40.018
Region 26.1	T1PKS	59.263	106.089	naphthopyrone	Polyketide	1
Region 27.1	T1PKS	27.49	73.11	neosartorin	Polyketide	0.31
Region 6.2	T1PKS,NRPS	856.2	957.368
Region 7.3	T1PKS,NRPS	1,886,673	1,963,761
Region 5.3	T1PKS,NRPS,NRPS-like	1,853,861	1,926,893	ascochlorin	Terpene + Polyketide	0.5
Region 1.3	terpene	1,917,285	1,938,533
Region 5.2	terpene	1,742,740	1,765,112	clavaric acid	Terpene	1
Region 7.1	terpene	771.609	784.58	squalestatin S1	Terpene	0.4
Region 7.2	terpene	1,125,847	1,142,242
Region 7.4	terpene	2,038,709	2,059,002
Region 8.2	terpene	1,422,301	1,443,703
Region 11.2	terpene	1,256,638	1,277,760
Region 13.1	terpene	17.383	38.121
Region 13.3	terpene	482.953	501.04
Region 13.5	terpene	750.462	771.464
Region 16.5	terpene	487.983	509.656
