# Supplementary material for: A Genomic and Transcriptomic Study on the DDT-Resistant Trichoderma hamatum FBL 587: First Genetic Data into Mycoremediation Strategies for DDT-Polluted Sites
Source: Microorganisms. 2021 Aug 7;9(8):1680. doi: 10.3390/microorganisms9081680 (PMC8401308; doi:10.3390/microorganisms9081680)
Supplement: Supplementary file 1 [file microorganisms-09-01680-s001.zip › Table S8_SM IMI 2060.xlsx]

## Sheet: Foglio1
Region	Type	From	To	Most similar known cluster		Similarity
Region 1.1	NRPS	331.092	401.406
Region 3.1	NRPS	1,617,109	1,662,565	enniatin	NRP	1
Region 5.1	NRPS	426.923	469.317
Region 5.4	NRPS	2,954,221	2,999,468
Region 6.1	NRPS	105.645	160.356
Region 7.1	NRPS	76.226	119.313	dimethylcoprogen	NRP	1
Region 7.3	NRPS	1,606,649	1,652,878
Region 8.2	NRPS	1,833,884	1,899,288
Region 16.1	NRPS	65.423	108.698
Region 20.1	NRPS	42.997	99.153
Region 7.2	NRPS,T1PKS	838.352	938.656
Region 17.1	NRPS,T1PKS,NRPS-like	773.146	871.873	fusaric acid	Polyketide	0.5
Region 3.4	NRPS-like	3,271,640	3,312,099
Region 4.1	NRPS-like	93.575	135.732
Region 4.2	NRPS-like	267.742	311.489
Region 5.2	NRPS-like	2,139,256	2,183,129
Region 8.1	NRPS-like	31.337	74.587
Region 12.1	NRPS-like	6.201	49.975
Region 13.1	NRPS-like	762.86	803.601
Region 13.2	NRPS-like	1,363,524	1,406,810
Region 19.2	NRPS-like	100.463	144.296
Region 20.2	NRPS-like	144.563	187.788
Region 3.3	T1PKS	2,107,173	2,153,316
Region 3.5	T1PKS	4,866,743	4,913,108
Region 4.3	T1PKS	420.579	466.7
Region 4.5	T1PKS	1,048,691	1,095,711
Region 5.3	T1PKS	2,586,418	2,634,632	ankaflavin / monascin / rubropunctatine / monascorubrin	Polyketide:Iterative type I	0.16
Region 7.4	T1PKS	1,657,486	1,703,274
Region 9.1	T1PKS	57.277	112.83	naphthopyrone	Polyketide	1
Region 9.2	T1PKS	192.601	236.787
Region 9.3	T1PKS	717.479	764.87	neurosporin A	Polyketide	0.26
Region 10.1	T1PKS	116.665	158.872
Region 10.2	T1PKS	818.683	866.293	leucinostatin A / leucinostatin B	Polyketide	0.1
Region 19.1	T1PKS	13.402	60.803
Region 3.7	T1PKS,NRPS	5,118,004	5,196,367	ascochlorin	Terpene + Polyketide	0.5
Region 15.1	T1PKS,NRPS	192.509	277.011
Region 1.2	terpene	1,087,358	1,104,003
Region 1.3	terpene	1,443,837	1,465,419	squalestatin S1	Terpene	0.4
Region 3.2	terpene	1,949,761	1,970,559
Region 3.6	terpene	5,010,704	5,033,077	clavaric acid	Terpene	1
Region 4.4	terpene	500.69	522.333
Region 9.4	terpene	1,102,634	1,123,637
Region 12.2	terpene	704.877	725.548
Region 18.1	terpene	387.004	408.412
