# Supplementary material for: A Genomic and Transcriptomic Study on the DDT-Resistant Trichoderma hamatum FBL 587: First Genetic Data into Mycoremediation Strategies for DDT-Polluted Sites
Source: Microorganisms. 2021 Aug 7;9(8):1680. doi: 10.3390/microorganisms9081680 (PMC8401308; doi:10.3390/microorganisms9081680)
Supplement: Supplementary file 1 [file microorganisms-09-01680-s001.zip › Table S9_SM T6085.xlsx]

## Sheet: Foglio1
Region	Type	From	To	Most similar known cluster		Similarity
Region 9.1	NRPS	663.022	717.769
Region 10.2	NRPS	626.688	676.122	enniatin	NRP	1
Region 22.2	NRPS	321.887	375.719
Region 24.1	NRPS	333.69	411.774
Region 30.1	NRPS	1	61.43
Region 32.1	NRPS	293.153	338.352
Region 36.1	NRPS	1	39.57
Region 55.1	NRPS	74.875	120.316	dimethylcoprogen	NRP	1
Region 92.1	NRPS	1	26.384
Region 3.1	NRPS-like	919.839	955.151
Region 5.1	NRPS-like	129.096	174.203
Region 6.2	NRPS-like	500.675	547.172
Region 9.2	NRPS-like	840.939	884.16
Region 11.1	NRPS-like	243.959	287.726
Region 16.1	NRPS-like	410.857	454.716
Region 41.1	NRPS-like	94.031	137.317
Region 48.1	NRPS-like	12.977	60.211
Region 52.1	NRPS-like	54.339	99.554
Region 53.1	NRPS-like	19.48	63.313
Region 64.1	NRPS-like	28.367	71.179
Region 5.2	T1PKS	432.258	478.54
Region 5.4	T1PKS	1,032,411	1,079,432
Region 6.1	T1PKS	38.104	86.318	ankaflavin / monascin / rubropunctatine / monascorubrin	Polyketide:Iterative type I	0.16
Region 12.2	T1PKS	99.239	147.451
Region 13.1	T1PKS	112.399	145.031	neurosporin A	Polyketide	0.26
Region 13.2	T1PKS	615.731	660.653
Region 13.3	T1PKS	737.592	794.721	naphthopyrone	Polyketide	1
Region 17.1	T1PKS	282.605	331.271
Region 21.1	T1PKS	22.201	69.813	leucinostatin A / leucinostatin B	Polyketide	0.1
Region 30.2	T1PKS	66.647	112.418
Region 46.1	T1PKS	19.782	67.181
Region 54.1	T1PKS	44.576	92.2
Region 14.1	T1PKS,NRPS	663.866	770.184
Region 39.1	T1PKS,NRPS	80.094	164.681
Region 22.1	T1PKS,NRPS,NRPS-like	73.082	151.901	ascochlorin	Terpene + Polyketide	0.5
Region 3.2	T1PKS,NRPS-like	1,403,245	1,462,910	fusaric acid	Polyketide	0.59
Region 5.3	terpene	502.461	523.824
Region 7.1	terpene	882.324	903.925	squalestatin S1	Terpene	0.4
Region 10.1	terpene	320.553	341.572
Region 12.1	terpene	15.421	37.799	clavaric acid	Terpene	1
Region 18.1	terpene	8.92	29.925
Region 27.1	terpene	505.35	526.359
Region 48.2	terpene	161.605	182.831	deoxynivalenol	Other	0.22
