# Supplementary material for: A Genomic and Transcriptomic Study on the DDT-Resistant Trichoderma hamatum FBL 587: First Genetic Data into Mycoremediation Strategies for DDT-Polluted Sites
Source: Microorganisms. 2021 Aug 7;9(8):1680. doi: 10.3390/microorganisms9081680 (PMC8401308; doi:10.3390/microorganisms9081680)
Supplement: Supplementary file 1 [file microorganisms-09-01680-s001.zip › Table S10_SM GD12.xlsx]

## Sheet: Foglio1
Region	Type	From	To	Most similar known cluster		Similarity
Region 19.1	NRPS	173.268	279.378	serinocyclin A / serinocyclin B	NRP	1
Region 32.1	NRPS	37.61	83.045	dimethylcoprogen	NRP	1
Region 325.1	NRPS	1	17.961
Region 373.1	NRPS	1	11.493
Region 478.1	NRPS	1	6.079
Region 8.1	NRPS,T1PKS	492.574	583.835
Region 171.1	NRPS,T1PKS	9.62	59.817
Region 41.1	NRPS-like	56.935	100.94	nivalenol / vomitoxin / 3-acetyldeoxynivalenol / 15-acetyldeoxynivalenol / neosolaniol / calonectrin / apotrichodiol / isotrichotriol / 15-deacetylcalonectrin / T-2 toxin / 3-acetyl T-2 toxin / trichodiene	Terpene	0.13
Region 57.1	NRPS-like	144.205	174.711
Region 75.1	NRPS-like	5.995	49.852
Region 181.1	NRPS-like	17.551	56.683
Region 232.1	NRPS-like	1	36.614
Region 244.1	NRPS-like	1	26.718
Region 37.1	NRPS-like,T1PKS	169.449	236.759	leucinostatin A / leucinostatin B	Polyketide	0.15
Region 87.1	NRPS-like,T1PKS,NRPS	22.516	81.271
Region 22.1	T1PKS	103.214	151.395
Region 72.1	T1PKS	99.433	147.127
Region 173.1	T1PKS	1	46.052
Region 178.1	T1PKS	1	29.902
Region 212.1	T1PKS	1	38.997	neurosporin A	Polyketide	0.26
Region 247.1	T1PKS	1	33.136	BII-rafflesfungin	NRP	0.23
Region 270.1	T1PKS	1	27.274	alternariol	Terpene	1
Region 16.1	T1PKS,NRPS	198.08	249.914	tryptoquialanine	NRP	0.09
Region 10.1	terpene	85.188	106.374
Region 22.2	terpene	188.715	211.088	clavaric acid	Terpene	1
Region 28.1	terpene	155.42	177.412
Region 128.1	terpene	73.701	95.482	squalestatin S1	Terpene	0.4
Region 172.1	terpene	40.161	59.765
