# Supplementary material for: A Genomic and Transcriptomic Study on the DDT-Resistant Trichoderma hamatum FBL 587: First Genetic Data into Mycoremediation Strategies for DDT-Polluted Sites
Source: Microorganisms. 2021 Aug 7;9(8):1680. doi: 10.3390/microorganisms9081680 (PMC8401308; doi:10.3390/microorganisms9081680)
Supplement: Supplementary file 1 [file microorganisms-09-01680-s001.zip › Table S11 SM MUT 3171.xlsx]

## Sheet: Foglio1
Region	Type	From	To	Most similar known cluster		Similarity
Region 14.1	NRPS	5.612	30.42
Region 25.1	NRPS	37.894	81.316
Region 154.1	NRPS	34.811	77.948	dimethylcoprogen	NRP	1
Region 207.1	NRPS	15.009	64.682
Region 14.2	NRPS,T1PKS	103.532	191.158
Region 16.1	NRPS,T1PKS	66.864	150.641
Region 26.1	NRPS,T1PKS	50.572	102.865
Region 69.1	NRPS,T1PKS	1	85.846
Region 203.1	NRPS,T1PKS	1	31.737
Region 385.1	NRPS,T1PKS	1	35.259
Region 19.1	NRPS-like	70.555	115.462
Region 47.1	NRPS-like	9.575	52.88
Region 51.1	NRPS-like	4.229	48.588
Region 77.1	NRPS-like	53.878	96.636
Region 218.1	NRPS-like	2.344	46.195
Region 279.1	NRPS-like	1	37.938
Region 739.1	NRPS-like	1	9.432
Region 157.1	NRPS-like,NRPS	17.626	66.124
Region 1.1	T1PKS	77.61	123.071	naphthopyrone	Polyketide	1
Region 12.1	T1PKS	1	28.643	tricholignan A	Polyketide:Iterative type I	0.62
Region 22.1	T1PKS	58.893	107.466
Region 26.2	T1PKS	120.041	165.985
Region 35.1	T1PKS	20.583	70.494
Region 37.1	T1PKS	82.378	129.543	depudecin	Polyketide:Iterative type I	0.33
Region 42.1	T1PKS	17.502	64.891
Region 55.1	T1PKS	85.309	127.12
Region 82.1	T1PKS	5.117	50.591
Region 153.1	T1PKS	1	41.957
Region 193.1	T1PKS	1	33.204
Region 234.1	T1PKS	1	30.982	chaetoviridin E / 11-epichaetomugilin A	Polyketide	0.16
Region 316.1	T1PKS	1	34.612	asperfuranone	Polyketide	0.18
Region 364.1	T1PKS	1	36.843
Region 469.1	T1PKS	1	24.997
Region 486.1	T1PKS	1	23.303
Region 616.1	T1PKS	1	15.373	tricholignan A	Polyketide	0.33
Region 658.1	T1PKS	1	12.787
Region 687.1	T1PKS	1	11.539
Region 137.1	T1PKS,NRPS	1	73.019
Region 41.1	T1PKS,NRPS,betalactone	1	43.189	aspyridone A	NRP + Polyketide:Iterative type I	0.33
Region 72.1	terpene	58.673	80.542
Region 105.1	terpene	50.082	71.35
Region 173.1	terpene	3.693	25.186
Region 202.1	terpene	27.804	49.274
Region 304.1	terpene	9.239	30.609
Region 476.1	terpene	9.703	24.336	squalestatin S1	Terpene	0.4
Region 481.1	terpene	7.994	24.199
Region 808.1	terpene	1	7.159
